# Supplementary material
Source: HighWire-hosted journal article supplement (https://jitc.bmj.com/content/8/2/e000877)
Supplement: inline-supplementary-material-2 [file inline-supplementary-material-2.xlsx]

## Sheet: Additional File 1
	Additional File 1: Table S1. Mass cytometry (CyTOF) panel
	Marker	Metal	Ab clone	Ab supplier	Ab cat#	Dilution
	CD45	89Y	30-F11	Fluidigm	3089005B	1000
	CD11b	154Sm	M1/70	Fluidigm	3154006B	6400
	F4/80	174Yb	BM8	BioLegend	123143	100
	Ly6C	165Ho	HK1.4	BioLegend	128039	2000
	CD11c	167Er	N418	BioLegend	117341	2400
	CD14	156Gd	Sa14-2	Fluidigm	3156009B	1600
	CD64	158Gd	X54-5/7.1	BioLegend	139302	400
	CCR2	209Bi	MAB55381	R&D Systems	MAB55381-100	100
	CD24	161Dy	M1/69	BioLegend	101829	400
	CD48	162Dy	HM48-1	BioLegend	103433	100
	CD38	163Dy	90	BioLegend	102723	1600
	Siglec−F	175Lu	E50-2440	BD Biosciences	552125	100
	MHC−II	115In	M5/114.15.2	BioLegend	107637	400
	CD86	171Yb	GL-1	BioLegend	105002	6400
	CD40	147 Sm	HM40-3	BioLegend	102902	200
	PD−L1	160Gd	10F.9G2	BioLegend	124302	1600
	PD−L2	148Nd	Ty25	eBioScience	14-5986-82	100
	ICOSL	143Nd	HK5.3	BioLegend	107408	100
	OX40L	149Sm	RM134L	BioLegend	108802	100
	CD70	142Nd	FR70	eBioscience	14-0701-82	100
	CD103	173Yb	2E7	BioLegend	121402	100
	Siglec-H	153Eu	551	BioLegend	129602	100
	BST2	151Eu	129C1	BioLegend	127102	100
	B220	176Yb	RA3-6B2	Fluidigm	3176002B	400
	Additional File 1: Table S1. Metal-tagged antibody panel used for mass cytometry analysis of intratumoral myeloid cells.
	For each marker, the antibody clone, supplier and catalogue number is provided, as is corresponding metal tag and the dilution used for cell staining.
	Antibodies purchased from Fluidigm were already metal-conjugated, all others were conjugated in-house.

## Sheet: Additional File 8
	Additional File 8: Table S2-S9
	van Elsas et al. Leiden University Medical Center, the Netherlands, Feb 2020.
	RNA-seq raw data
	B6 = Bone marrow neutrophils from a BL/6 mouse (without a tumor)
	TC1 = Bone marrow neutrophils from a BL/6 mouse bearing a TC-1 tumor
	Balbc = Bone marrow neutrophils from a BALB/c mouse (without a tumor)
	CT26 = Bone marrow neutrophils from a BALB/c mouse bearing a CT26 tumor
	Table	Description
	S2	Normalized average CPM values per experimental group for all genes.
	S3	Differentially expressed genes, relevant comparisons of experimental groups. DE = differentially expressed, defined as p-value <0.05. E.g. for "B6 vs Balbc" comparison, DE = 1 means higher in B6 than Balbc, while DE = -1 means higher in Balbc than B6.
	S4	Metascape (MS): gene sets enriched for genes higher expressed in BL/6 than in BALB/c. Biologically related gene sets are grouped under their lead member as shown in orange. Corresponds to Figure 6b and 6c.
	S5	Metascape (MS): gene sets enriched for genes higher expressed in BALLB/c than in BL/6. Biologically related gene sets are grouped under their lead member as shown in orange. Corresponds to Figure 6c and Additional File 7: Fig S6e.
	S6	Metascape (MS): gene sets enriched for genes higher expressed in TC-1 than in CT26. Biologically related gene sets are grouped under their lead member as shown in orange. Corresponds to Additional File 7: Fig S6f.
	S7	Metascape (MS): gene sets enriched for genes higher expressed in CT26 than in TC-1. Biologically related gene sets are grouped under their lead member as shown in orange. Corresponds to Additional File 7: Fig S6g.
	S8	Ingenuity Pathway Analysis (IPA): predicted upstream regulators for BL/6 and BALB/c. A positive activation z-score ("activated") corresponds to BL/6, and a negative activation z-score ("inhibited") corresponds to BALB/c.
	S9	Ingenuity Pathway Analysis (IPA): predicted upstream regulators for TC-1 and CT26. A positive activation z-score ("activated") corresponds to TC-1, and a negative activation z-score ("inhibited") corresponds to CT26

## Sheet: S2 (CPM)
feature	AverageCPM_B6	AverageCPM_TC1	AverageCPM_Balbc	AverageCPM_CT26
ENSMUSG00000000001	219.55837699799	208.028915403446	240.248202813697	253.062652139518
ENSMUSG00000000028	28.2198380400522	29.0758680073056	34.0601500383747	33.6224798553304
ENSMUSG00000000056	74.2126853635109	67.9103680984291	60.1160003060126	61.1805233967566
ENSMUSG00000000078	427.565026382516	524.977107188792	420.374658763085	411.935041005971
ENSMUSG00000000085	8.73958989190582	8.99399378665715	17.4637703499479	18.2019441516489
ENSMUSG00000000088	61.2950900448561	77.2642828291784	59.7804394293236	62.9159159149668
ENSMUSG00000000127	11.5557099541725	11.747176546086	17.2761303519516	17.0106308429639
ENSMUSG00000000131	104.33163198374	89.0587308896259	116.598915291776	113.116260080857
ENSMUSG00000000134	135.036974112893	111.859700972109	115.249327265047	104.136729038056
ENSMUSG00000000148	25.6898643432483	23.4243916793022	19.9031963004491	21.89708107773
ENSMUSG00000000149	48.3161590277475	51.1204811293175	57.3827719478414	51.4837094151108
ENSMUSG00000000157	948.821322437878	820.241070767193	25.8050504625735	27.4154472696591
ENSMUSG00000000168	16.8807119654919	18.0765639424749	21.044536512006	22.0251722381877
ENSMUSG00000000171	64.1033352586812	67.3671333530246	60.8214518660655	61.736351691254
ENSMUSG00000000184	28.0460170851048	27.4236818582115	15.4057019428662	14.2693208470104
ENSMUSG00000000194	60.9150910781058	55.5664911624395	54.606790865152	57.6819472657538
ENSMUSG00000000204	20.3278686903427	19.3974153046966	15.8648827128423	15.9191639734585
ENSMUSG00000000244	48.6173660155249	60.2657158629759	30.253686752988	29.1314108293908
ENSMUSG00000000253	2.33019558399617	2.13013500300697	2.39118323782664	2.2703232788899
ENSMUSG00000000275	71.8643950330324	64.6318164567317	63.6249055665619	65.5649174189896
ENSMUSG00000000278	13.6038441502711	11.0675966750057	19.6155969054409	19.5920933280127
ENSMUSG00000000282	42.4683461054629	38.8038672743245	33.8821822389188	36.7926461535219
ENSMUSG00000000290	2403.5227501282	2061.56268342628	1757.00288178738	1686.12122582568
ENSMUSG00000000295	1.34491473725236	1.17472605585353	2.07952341439493	1.72235360158192
ENSMUSG00000000303	8.34746663134385	6.80677460559969	9.3807865462437	8.92039348340507
ENSMUSG00000000318	6.40971608664174	9.03287493471338	2.87650817154748	3.30304978311095
ENSMUSG00000000320	1.99602714006336	1.94774895934509	2.49368445883156	1.32064435068973
ENSMUSG00000000325	2.52143046179663	2.30177484473352	3.09304982185025	2.28966419674234
ENSMUSG00000000326	28.272133436646	28.32852851297	25.6900567220318	27.1694331295103
ENSMUSG00000000339	11.8815301957712	12.305945854343	14.5169972928363	15.7744566071505
ENSMUSG00000000340	2.16781949747385	2.6604819235682	2.97459677419623	2.39062198996272
ENSMUSG00000000346	428.264349866963	420.62468865526	385.018725679047	357.279997644408
ENSMUSG00000000355	15.8419388568956	18.5349438341957	12.2467965354894	12.4937702841411
ENSMUSG00000000374	48.3333774129593	44.5146573024591	53.3377767634202	53.8624340368736
ENSMUSG00000000378	132.032626463062	120.014294771362	120.432246226356	109.26832756262
ENSMUSG00000000384	35.8286801737012	32.3881529010735	36.13659238889	38.6348208357161
ENSMUSG00000000399	48.6782967682261	57.9707503956499	46.7835031143817	49.4705130481424
ENSMUSG00000000409	1.5920788075519	1.21190934921776	1.94084431058796	1.12709818632521
ENSMUSG00000000420	61.1011971891581	61.7869495232099	77.508851968306	70.7645907322206
ENSMUSG00000000439	10.1276520252041	9.59861365376463	11.4346968147201	11.0073319230162
ENSMUSG00000000440	7.17910599416305	8.70528532285587	4.1460442997143	3.3224318320556
ENSMUSG00000000441	172.569462176378	155.294905037995	156.585645227515	148.037264224468
ENSMUSG00000000486	275.048002896651	260.595653349992	279.27594897377	249.068239665741
ENSMUSG00000000489	1.49601777313753	1.99413553487807	0.861444426092175	1.14237511339597
ENSMUSG00000000530	350.392075726347	286.501014197678	4.3110489572728	4.3504575616703
ENSMUSG00000000532	40.9576866055982	40.0458215121154	7.61085087031906	9.56573471445465
ENSMUSG00000000538	5.55920777765288	4.35333253384101	6.19743480628633	5.82562092235089
ENSMUSG00000000552	26.3539180199681	27.8248698573746	27.9312900886822	25.0611756287878
ENSMUSG00000000555	7.63875689807652	9.43523060914089	9.81072166338032	14.5180664059949
ENSMUSG00000000561	12.1289142624028	13.246935897957	11.8469444472118	14.0658597838054
ENSMUSG00000000562	3.71935563557546	2.94952809045165	2.80368362754408	3.50953063397286
ENSMUSG00000000563	219.421765935795	255.264434437459	199.408332872948	201.892959258759
ENSMUSG00000000568	151.485347326576	157.984735461064	226.077347469184	204.272550118586
ENSMUSG00000000579	9.41614485878229	10.0712021783202	17.2181307971753	13.4307779416674
ENSMUSG00000000581	19.9878322860377	23.5932684703521	21.0038145236741	18.3759346501875
ENSMUSG00000000594	149.172419657808	166.176293278311	92.7481179573052	87.4695338176998
ENSMUSG00000000600	9.9806465593022	12.7442859327348	8.49806166202663	8.98441701942059
ENSMUSG00000000605	34.8229403279818	38.9822768845678	27.2933931317351	28.817568317538
ENSMUSG00000000627	70.7124795320795	56.0543470903184	48.5439638782751	42.0781847934278
ENSMUSG00000000628	138.875031717299	135.032405644411	117.636481259448	115.875306256368
ENSMUSG00000000631	217.178379407202	176.012578366848	198.101478011003	193.856108553958
ENSMUSG00000000673	16.6201122565447	16.896153137021	13.9374266401942	14.5631322335335
ENSMUSG00000000682	1201.30666581008	1244.85273273221	707.838388557075	725.926863975392
ENSMUSG00000000686	20.6173589443423	15.9578583372154	14.6833206258029	11.4264064017066
ENSMUSG00000000708	17.3872786141547	16.909509037274	22.606534246192	19.7201682375976
ENSMUSG00000000711	232.603251135579	206.713523947195	243.280071362544	228.745441985279
ENSMUSG00000000732	40.3794574015943	34.6335295505154	39.5879776995916	33.550457243928
ENSMUSG00000000738	27.7503492256815	28.9916102340529	31.8306906633581	29.9627552615211
ENSMUSG00000000740	418.439968043679	460.475840772824	441.623085961143	493.053255761527
ENSMUSG00000000743	120.69359099387	123.067058151258	94.7348651685508	81.2887507514426
ENSMUSG00000000751	40.8910095633242	49.5675740824855	60.3165901905363	67.2666223796678
ENSMUSG00000000759	9.34029136107406	9.78922880562521	13.1179754655928	14.1396490889909
ENSMUSG00000000776	1.45987966475436	1.63116997311444	1.69686346534447	2.10325766891082
ENSMUSG00000000787	270.704481818895	257.204450504667	311.918766278378	287.662638648659
ENSMUSG00000000791	1.58439930702975	1.21330917528929	2.03740330832863	2.4853421486565
ENSMUSG00000000804	64.6225015641788	60.0855044368451	55.766378293354	59.4366711445008
ENSMUSG00000000823	2.65122412895419	3.34543287079382	5.42429993674316	4.65950927032801
ENSMUSG00000000826	197.131525149683	171.697892670104	218.403503096561	226.304523025529
ENSMUSG00000000827	35.607342899473	35.702266639496	59.2973181434884	51.7810492437662
ENSMUSG00000000838	21.8889283386526	21.9371440924677	30.7613893044914	28.5384331527408
ENSMUSG00000000861	10.7077583343686	12.4338772775512	14.7253147528299	14.2018171195071
ENSMUSG00000000876	44.4432225175697	46.0158930159544	35.7265096923838	34.6625939800298
ENSMUSG00000000902	35.0578890076318	37.1160846950089	36.3831448452041	35.7956377304889
ENSMUSG00000000903	9.03816918576432	8.39454883199163	13.7335480220216	10.2253906770309
ENSMUSG00000000915	186.878417605216	151.676228460195	166.379815463229	161.127435411456
ENSMUSG00000000916	3.32439719566261	2.37413366160509	4.09658102095378	4.48697659016071
ENSMUSG00000000957	3.96315126124555	3.59804970697555	1.17950465903651	0.772548077433273
ENSMUSG00000000958	16.3160466336141	14.9516244396408	64.4943049142673	65.4796632695827
ENSMUSG00000000959	26.3555665326807	24.8643226443029	32.2712670919898	33.2182712315101
ENSMUSG00000000976	27.4800484167109	26.0816906246669	28.156163110453	29.5486117238191
ENSMUSG00000000982	6.47277028060885	5.82903389264328	4.40273099798502	2.18715465762721
ENSMUSG00000001016	37.2527091400996	41.7789112294426	47.917362077782	48.7846480042022
ENSMUSG00000001017	87.7115329659342	83.5176526995876	97.6967495016719	94.5439682203522
ENSMUSG00000001018	11.0271878575944	10.8337695815457	10.8758449571604	9.69265355640996
ENSMUSG00000001025	1330.36656060466	1516.92855521968	712.652737818235	750.699624106081
ENSMUSG00000001029	11.0232708081789	10.6026826288496	8.95026613530469	8.88734405429567
ENSMUSG00000001034	39.0362902098149	35.1267650478842	42.1753952080692	40.2078174377347
ENSMUSG00000001052	42.50016771864	38.854713475352	37.4924705771591	40.0773219769377
ENSMUSG00000001053	5.74094496573589	5.92504095786103	5.07518641088863	3.61499008952732
ENSMUSG00000001054	66.9895574220187	59.6034760534817	69.0826587999363	62.4806880371583
ENSMUSG00000001056	22.8817501794099	26.8924371897793	22.7686049847304	24.0722171069957
ENSMUSG00000001062	22.2837853334454	21.4239608398554	11.8351097884324	12.0670011901871
ENSMUSG00000001065	36.7070769287239	28.6610032398825	17.3229093359278	16.3422212700029
ENSMUSG00000001082	26.5646668066245	26.2978002060419	35.5022994741911	39.5984767366408
ENSMUSG00000001089	2.03382122287141	2.51034219857332	2.35371964082015	1.9900527608957
ENSMUSG00000001098	198.771667458698	172.390114848559	197.740528723391	192.544052167138
ENSMUSG00000001100	15.3058074569311	15.1844254718531	16.3910995885915	16.4028986310872
ENSMUSG00000001105	22.7239409407239	31.2474057987375	19.5332451319124	21.0813085164472
ENSMUSG00000001123	251.069832344618	225.168442756728	190.479015969461	169.520894329536
ENSMUSG00000001127	31.6391382081931	27.3416743712526	28.3648680979229	27.0836006383389
ENSMUSG00000001128	487.291880980864	475.2026318265	245.84707773539	243.039355212751
ENSMUSG00000001134	7.32487352771008	8.86620945913427	6.60661146343583	6.38508438514595
ENSMUSG00000001138	19.8073943848881	18.2805943397678	23.2620849051372	20.1649270915765
ENSMUSG00000001143	65.8751952772645	61.1163895490246	53.2998405168068	55.3108596047882
ENSMUSG00000001150	77.4605379144193	69.386986499286	71.2393480359613	73.5613661309439
ENSMUSG00000001151	37.0672543133634	39.2899199068913	41.8045506151202	44.3422652803107
ENSMUSG00000001156	691.321779805145	764.30972791831	592.29068602962	617.730201656565
ENSMUSG00000001157	16.532508299674	15.1531777201723	18.1764558058036	19.5306370404554
ENSMUSG00000001158	33.94873864587	55.5027653485902	24.9697550225017	26.0178044532598
ENSMUSG00000001166	5.73570007787814	5.02233817923755	4.23063180880142	3.01324041769751
ENSMUSG00000001173	5.72499282656856	5.51828799508098	9.82896555460989	8.83880717584749
ENSMUSG00000001175	956.197815874328	1012.65597868136	859.835176279607	861.602940181231
ENSMUSG00000001211	8.50474544752723	9.83380008493827	7.02196448458394	6.07812169275326
ENSMUSG00000001227	9.55975237733917	18.2638070206083	6.80856319542739	12.151997530438
ENSMUSG00000001228	52.0051739969449	53.6541123672657	79.6175526199228	85.0873895716276
ENSMUSG00000001229	43.131324187314	44.7420009153987	43.6757599716922	50.6656568131153
ENSMUSG00000001248	44.7132739589927	42.1813776196544	33.9819768506244	33.5555883668963
ENSMUSG00000001270	14.9267410419673	18.7712388586352	11.085119793694	8.29644046977162
ENSMUSG00000001280	105.590749022574	86.8215239800535	93.5632740372647	101.542221425115
ENSMUSG00000001281	86.022093092978	69.823593385273	78.6835261480175	74.1045845701774
ENSMUSG00000001285	15.0831459354903	18.8176097357407	15.7798009254461	15.5308763656224
ENSMUSG00000001288	43.6434407734486	31.5845866607154	36.6357410440453	29.1571089622021
ENSMUSG00000001289	228.429143043724	249.191541174855	185.640626002459	172.92096615667
ENSMUSG00000001305	4.58417166995392	6.44499023253489	5.91578163082217	6.07549758587267
ENSMUSG00000001323	2.86171602259334	3.25690987382129	4.22694732771797	4.09192008027319
ENSMUSG00000001348	10.7942266309105	13.5337422235081	8.96425335995443	7.74182270575327
ENSMUSG00000001366	16.8135639123211	15.9692119768302	21.0679125209556	19.5150930320585
ENSMUSG00000001376	4.06524478249009	5.67902714741056	5.48141955586715	6.29074807296182
ENSMUSG00000001380	35.2538906875272	34.3571998530388	36.0712494841069	39.7640288412195
ENSMUSG00000001383	90.0224247649452	111.691043964218	111.134856011316	99.9406452515266
ENSMUSG00000001403	66.798118281781	74.7777087705345	96.3235501351545	95.6767604364443
ENSMUSG00000001415	26.4232091428373	26.1901385592286	33.6776374011874	31.9325238045196
ENSMUSG00000001416	41.2107704868539	44.6525213002827	41.8618431442327	48.6162916417442
ENSMUSG00000001418	68.2183841259653	68.0767196170579	55.5800516919692	62.4877310457795
ENSMUSG00000001419	45.8411137708726	37.174237329055	44.0228120868921	40.0514180705368
ENSMUSG00000001424	69.0986483490399	74.7504209696419	67.9833212753174	79.4001463356262
ENSMUSG00000001436	2.15097616282414	2.45786899097732	2.53745221458968	2.92063182394776
ENSMUSG00000001440	139.054680790629	134.303398694957	167.817492177488	185.282729440799
ENSMUSG00000001441	276.985309472125	292.659587908171	229.342001956553	265.149693785569
ENSMUSG00000001445	39.0460668769663	40.5702579933497	34.4039228940169	33.8881231335018
ENSMUSG00000001467	13.5141621063005	17.941407991542	11.6322534161125	12.3716993082766
ENSMUSG00000001472	163.460766236109	153.867776679051	164.742597794646	163.773680748341
ENSMUSG00000001473	2.28964163022168	4.61109617288717	2.01909951161124	3.65000750467488
ENSMUSG00000001482	89.5420993860511	79.7415863949489	107.857807126315	103.770910922775
ENSMUSG00000001506	3.22514207832977	2.94999491696866	1.68332385406568	0.416356136251519
ENSMUSG00000001517	26.6603219349668	27.2786505552917	40.0888389453298	45.9154378364482
ENSMUSG00000001518	1.73331015734702	2.98520753516037	2.8484356047595	3.4073650508108
ENSMUSG00000001524	5.27040498531221	5.37153675957898	5.89276809808883	6.31884414933919
ENSMUSG00000001525	379.851439721025	405.883894402716	526.067636866166	517.197413115497
ENSMUSG00000001542	28.9523002092636	28.3541558619534	22.8854198099434	24.9900479654562
ENSMUSG00000001552	30.8902661121465	30.4018485825959	13.8454124028982	14.7115163487423
ENSMUSG00000001569	11.2811509029346	10.649378118559	14.4119636561296	15.2292470407163
ENSMUSG00000001576	12.9551034316571	12.024985403619	10.9526898413093	12.7285604229298
ENSMUSG00000001588	303.647193092656	264.053540996	224.346910013433	211.835655485357
ENSMUSG00000001604	3.26770103847885	2.92888691956449	0.137610979107138	0.190955654066228
ENSMUSG00000001627	33.1982721926136	31.7286105765712	32.2837838356147	25.4876792542758
ENSMUSG00000001630	4.44798573121765	4.41750610955969	1.6777191899195	2.19385513910743
ENSMUSG00000001632	100.924382876045	100.048772340375	97.0549543395936	100.106498465446
ENSMUSG00000001642	22.3089795120747	22.5925363569965	25.5305330131557	27.3257289675987
ENSMUSG00000001674	11.1587142452889	14.5879480973157	11.3067711556199	12.2914692361709
ENSMUSG00000001687	148.405682235109	143.001351236436	157.802921157088	159.742458450971
ENSMUSG00000001700	2.12562478613064	2.42134336700947	2.58836683027638	2.33967077913995
ENSMUSG00000001707	3.54822185200199	4.92528987351427	3.46440992276378	4.42530015642967
ENSMUSG00000001729	320.557749186176	296.904685911601	338.058678416773	322.70381434296
ENSMUSG00000001739	80.3981478281456	78.7480559866743	56.4554104740713	56.8812645210265
ENSMUSG00000001741	564.714864268733	478.53799304951	444.715981171836	415.642422914509
ENSMUSG00000001750	99.7373028601994	91.1901378225231	95.4898410875927	101.418998369217
ENSMUSG00000001751	12.1332877637101	12.4197807862409	13.3621811992416	13.4508200756421
ENSMUSG00000001755	14.2429803312503	15.6698324401297	15.0774203774732	16.2593565343582
ENSMUSG00000001761	1.37697664370484	1.83094646377246	3.13664903545294	3.78403252405469
ENSMUSG00000001763	3.22943740759128	5.34287505032391	3.51336141837763	2.97616139500236
ENSMUSG00000001767	75.1669062812658	72.4930135245117	62.3742238450013	61.9410122204186
ENSMUSG00000001768	112.163345445166	91.4785214210426	88.127937491355	82.3177308114388
ENSMUSG00000001774	37.9917509426161	35.5289254516211	35.7351645875524	43.1428531180466
ENSMUSG00000001783	49.4468549679766	49.2836379607554	49.597092877056	50.15703947136
ENSMUSG00000001785	47.6029490824658	41.9246479436633	49.0909360798813	48.8562066097124
ENSMUSG00000001786	11.1369265501412	12.0262925772035	10.2664071648915	10.2440455379293
ENSMUSG00000001794	408.086652282142	414.849900560831	274.749397081373	269.820478585337
ENSMUSG00000001829	12.9454557674762	11.7066202546514	17.7866482042081	18.5395066536245
ENSMUSG00000001833	145.339579125426	155.586185434952	149.668396570359	146.480218676199
ENSMUSG00000001844	15.0479192376439	16.5909742511191	19.3730650140768	19.6127434260155
ENSMUSG00000001847	297.620362486848	290.831752080034	264.698203128249	277.712523476969
ENSMUSG00000001855	41.6420053780663	39.3535620627933	41.6584984857293	45.0023938310058
ENSMUSG00000001865	28.8401231910415	21.3667394832825	39.6827335209495	30.4242716680579
ENSMUSG00000001891	168.427578218467	161.683922401628	157.911791084031	159.285332637692
ENSMUSG00000001909	7.97256905106873	9.24977673984326	8.06375485249004	9.33238976224099
ENSMUSG00000001910	78.5159845088837	74.5552781691339	74.1210642745225	86.240788091747
ENSMUSG00000001911	8.02326466152664	7.17709694722451	7.00214180603575	7.16090834402753
ENSMUSG00000001918	16.9245055042266	19.1946746139597	31.2986437625412	34.6091066796439
ENSMUSG00000001924	535.067915828872	471.884017698097	445.738146915546	462.646676710816
ENSMUSG00000001930	7.57493611559979	11.691689423495	8.40982628580678	5.6670931038584
ENSMUSG00000001942	4.3522947122117	3.78182357377835	5.23467283457613	5.20044992832065
ENSMUSG00000001962	64.6478993022815	64.2330763467052	48.6059453408965	44.4205226335116
ENSMUSG00000001964	35.0921534546336	37.2812282196413	32.8206837384118	36.11470269998
ENSMUSG00000001983	5.74965082885468	6.12056754361385	5.99683132951174	6.64805376831412
ENSMUSG00000001986	1.87435815641497	1.91095163517656	4.09194790370849	5.38759996733645
ENSMUSG00000001995	55.0277925423457	48.6515342409716	51.2344344522109	53.0330226460454
ENSMUSG00000001998	6.00514911656102	6.49766983734694	7.08397528609266	8.93106818884613
ENSMUSG00000001999	8.83303202540742	10.552289781134	9.36089236491316	9.34428847315544
ENSMUSG00000002006	1.91745914568872	2.7068184803415	4.8329040553438	4.21841229292799
ENSMUSG00000002010	57.7546864767891	56.1968876872926	55.0504898665858	57.34258182226
ENSMUSG00000002014	32.5860497092205	39.0623216709248	43.2093165977997	46.3004367235825
ENSMUSG00000002015	130.003795969816	138.080696924723	112.23110991623	113.111745962088
ENSMUSG00000002017	9.59538082435826	10.9037466868171	15.0693183136082	15.7967723426504
ENSMUSG00000002028	34.6787412180027	38.4494619751107	35.8726407598551	36.5369287907692
ENSMUSG00000002031	10.6429466664327	12.2414317781785	8.73026158905746	10.3294214117716
ENSMUSG00000002043	13.8739427021293	15.0662542903173	14.7798577687877	13.9701516175397
ENSMUSG00000002052	143.367338308372	119.017578108624	135.660499553168	133.428007629011
ENSMUSG00000002055	30.4535310604336	34.7357497046735	38.4598419231777	42.8570422422909
ENSMUSG00000002058	121.235265683036	120.87764737531	106.355129268547	97.9136607317936
ENSMUSG00000002064	45.4469375693118	43.7268600732066	29.964448943897	29.7545512774544
ENSMUSG00000002068	7.25668111327808	8.5322943520834	9.87327801582178	15.5034548301605
ENSMUSG00000002083	10.0885520756857	8.2360448089868	8.51211644317575	7.20622791918431
ENSMUSG00000002102	140.637493468998	150.229480137944	130.191100928491	139.063937430493
ENSMUSG00000002103	30.7330714201666	33.7279345806902	23.1777683501639	23.5337506610464
ENSMUSG00000002105	4.19984319587602	6.0529877875934	3.26435479968104	3.31419803568607
ENSMUSG00000002107	259.091276195162	289.854075301836	182.107036785476	192.895750758203
ENSMUSG00000002108	8.25309817655901	7.6591253837554	3.34971938004735	3.18803712939569
ENSMUSG00000002109	2.38619138344535	2.45560056096782	2.4047320043338	1.7191359973748
ENSMUSG00000002111	1027.75792957685	1010.83819426161	744.87466793859	742.212872784836
ENSMUSG00000002129	69.6029385628645	67.8009261081003	68.0562032253409	78.3593686286642
ENSMUSG00000002147	334.778640673332	289.249582728984	259.192854932371	258.194798275045
ENSMUSG00000002204	155.072101295304	168.191397104742	144.144453225278	162.13145686697
ENSMUSG00000002205	61.5381005835732	62.2851363098618	48.5327574237985	47.1360193919392
ENSMUSG00000002210	99.0434457954906	88.9915105724503	68.3542751833915	60.4541905695075
ENSMUSG00000002221	9.04875513596052	10.8195480077936	13.106986491793	13.7855255832361
ENSMUSG00000002222	40.0785166070588	34.097448630959	45.6188359414973	43.1473123652819
ENSMUSG00000002227	150.737133753262	129.083335851039	79.3107252652685	97.4860644669452
ENSMUSG00000002233	32.5230473912676	36.1043468708817	23.0350083201202	20.4702737623365
ENSMUSG00000002250	23.5024573457473	24.833630576747	19.4645957028609	23.4460009690324
ENSMUSG00000002257	222.185061378914	208.583121765018	202.568215349697	188.528860153448
ENSMUSG00000002274	5.12783534415099	5.41896234009515	9.7616734615724	10.7030609024702
ENSMUSG00000002279	2.97137181231832	3.61550736045214	4.28807381544558	3.97090191394801
ENSMUSG00000002280	26.2577825973397	25.3594438747202	23.5748953710461	23.5900339179542
ENSMUSG00000002289	1.48592415957816	1.80467526294134	2.16041497983884	1.4256170697732
ENSMUSG00000002297	16.4994482632369	19.3695046587747	22.8577832552447	27.6733746544433
ENSMUSG00000002307	41.938281351089	37.5083138021306	38.8263922174677	38.4064019199353
ENSMUSG00000002320	16.3692888374368	17.2007379043955	21.169749373069	20.6584217897238
ENSMUSG00000002325	124.218772149672	104.148772697697	85.8168636089644	82.2574701641325
ENSMUSG00000002326	16.3505107512702	14.9757755663762	16.0689368629997	17.8042622019229
ENSMUSG00000002329	5.84639269876695	5.08570864755863	6.06242487076398	5.45279068677856
ENSMUSG00000002332	79.5653529047402	80.1430127833506	53.7014897957199	57.0653838684154
ENSMUSG00000002342	5.94269918578089	6.44071035592174	12.1927153981985	11.5937222225034
ENSMUSG00000002343	5.482380133685	4.25604911036018	8.66657159538486	8.41597804575153
ENSMUSG00000002345	20.036029700842	21.5869516693799	22.1164093057887	22.1909880291947
ENSMUSG00000002365	30.6793766040803	31.514726961697	30.8107363723435	29.0454505411865
ENSMUSG00000002372	46.055618982405	45.9886311406964	47.3493298530421	47.8251085624617
ENSMUSG00000002379	22.2276788891478	26.606308629016	25.2491162081369	27.7000339004004
ENSMUSG00000002393	8.28626344581473	7.33712086613543	8.32837263932261	7.25391096063238
ENSMUSG00000002395	134.784073177228	141.57153143656	88.6761630040558	83.4088110388328
ENSMUSG00000002396	13.9761208554784	13.2587786734769	28.142985862648	27.6974058168998
ENSMUSG00000002409	15.5713814755449	13.9599025228931	14.4840213898036	13.2193225429999
ENSMUSG00000002413	52.0763557976386	45.8172005955691	51.6596708199245	52.6946385821443
ENSMUSG00000002428	31.7282028003642	32.136207708211	24.82908145188	28.0108814493983
ENSMUSG00000002455	104.096395445431	101.278356339412	84.4348728651594	75.8478474265744
ENSMUSG00000002458	220.064212851828	202.159715633115	196.900806830631	206.2032703636
ENSMUSG00000002477	16.6190079330377	22.7391151190447	22.9063579792679	23.6400944170596
ENSMUSG00000002486	1.64812084932217	1.56610749122581	2.69321176327833	2.37248567269931
ENSMUSG00000002489	76.6369983146192	71.76753701469	102.12725072504	104.818953982317
ENSMUSG00000002496	51.0258948104421	39.5425261571718	41.3972735480385	41.7454955981436
ENSMUSG00000002504	6.27099541490542	5.46814834760959	7.08453537719552	7.10652298171543
ENSMUSG00000002524	103.604295289453	99.1340433934576	101.264378536191	98.2399522311942
ENSMUSG00000002546	109.218883351113	94.3958435688091	102.783680311388	101.122240575221
ENSMUSG00000002550	11.981984652002	12.3878377221736	15.1112738696759	14.1967348681885
ENSMUSG00000002580	40.8147477610238	49.5236830427828	28.1931617494338	25.1956156842435
ENSMUSG00000002602	160.05006929629	168.331156714967	125.027002925101	94.0348370671472
ENSMUSG00000002603	249.139278945076	231.807633457211	278.750582419862	269.37925196764
ENSMUSG00000002608	95.6205427690939	89.9385031222239	80.9862245714601	80.2178423595646
ENSMUSG00000002625	22.9574397473433	20.7353853834062	20.3849632027228	15.125120426727
ENSMUSG00000002635	8.48656350335575	8.37772824776036	6.71098871393655	6.66265214089441
ENSMUSG00000002658	88.7002876624436	99.7760304703202	80.7058065888225	86.0625191724818
ENSMUSG00000002660	6.36961201214452	9.13769366397876	7.54087232920033	7.74393532558051
ENSMUSG00000002661	5.35766194319749	7.50896515540181	5.10234675650798	4.70762117272282
ENSMUSG00000002668	75.4203667944982	71.2976586007482	55.4010494684674	52.7455858421519
ENSMUSG00000002679	6.68009151144028	6.55372295797207	6.6008532612209	7.05700164122536
ENSMUSG00000002699	257.716561026345	226.015507460267	220.17081323849	215.097060097089
ENSMUSG00000002718	21.4829347084821	22.1448518781592	28.8252205824886	33.4379502767385
ENSMUSG00000002728	7.22207059905751	7.96283315418452	6.26735136294257	7.99589493417939
ENSMUSG00000002731	10.7921294374273	12.2426641488925	12.167567811644	11.5038409300337
ENSMUSG00000002733	5.27524074174085	4.72324104996175	5.27339792526756	6.09909016300789
ENSMUSG00000002741	84.3844202892305	83.7368974467668	81.3997716444121	80.8767353535644
ENSMUSG00000002748	163.125010743757	156.659062935143	179.290626214166	181.104403958004
ENSMUSG00000002763	43.2977120476441	45.7835096923927	33.1354906343166	35.0983618116299
ENSMUSG00000002767	12.6196601392323	15.788821277221	15.3520280174452	15.7717984549221
ENSMUSG00000002768	68.3671079074264	72.9923916266658	54.1619302622916	49.1433714945611
ENSMUSG00000002778	67.1428329920561	68.0416179939484	61.5096649603796	63.2826125495684
ENSMUSG00000002781	4.98224352417056	5.93655012525539	5.37337792101602	6.00990905826387
ENSMUSG00000002797	3.71499903293708	4.79515503218756	1.93740342944583	1.7823485114222
ENSMUSG00000002803	3.18291283719403	3.73399497150519	4.16212287483006	4.4730778217205
ENSMUSG00000002804	2.78279628846809	4.09674649828148	3.97121224158243	3.77877657598588
ENSMUSG00000002812	348.579871020007	304.750589188798	277.087039569388	281.492994158893
ENSMUSG00000002814	9.97867296250388	8.56221608702111	11.5334828893965	10.3746669753013
ENSMUSG00000002820	51.9098560535715	53.4140573378474	49.9864268540413	49.4013727696337
ENSMUSG00000002833	38.8312234926786	39.5775328011016	41.5129001471023	36.4599870454046
ENSMUSG00000002835	39.5227245100962	44.1833062737154	60.0351356539463	61.6736759651459
ENSMUSG00000002844	150.520633939835	154.028313887334	119.197312199218	113.483619509462
ENSMUSG00000002845	7.3733001117571	7.37415035812798	8.05064359063634	9.94791135676721
ENSMUSG00000002846	10.6166381351431	14.2307516363345	10.6296938527045	11.4307082215633
ENSMUSG00000002870	45.274636383466	48.5067394821649	68.7370559135027	69.7106279232281
ENSMUSG00000002871	13.281026222802	13.6829496983075	12.7390703955837	12.7659242460906
ENSMUSG00000002881	53.722475119653	54.2689484650532	61.106032485821	65.0475677338535
ENSMUSG00000002885	457.629457613896	457.771392578847	293.187615260001	294.764968844572
ENSMUSG00000002897	567.62437605112	489.607879993685	434.739353731359	402.683307215494
ENSMUSG00000002910	2.39528925566827	2.44831771510269	2.60638075645129	2.22305647955396
ENSMUSG00000002944	5.75786518118828	3.95106964398243	2.32060326176587	1.72571195181331
ENSMUSG00000002948	17.0739758012535	17.0157265431575	22.8009837181677	19.9560410688588
ENSMUSG00000002949	13.9493247024106	18.8105433511233	18.0020869181635	19.3252113586901
ENSMUSG00000002957	188.197535392691	170.642933956525	202.948649023135	224.118490438736
ENSMUSG00000002963	728.842905250331	654.804604627968	498.340211907201	477.03207417669
ENSMUSG00000002968	26.2690206000419	26.8084365346571	25.3053464302117	25.5147568473162
ENSMUSG00000002981	115.410396784685	105.079692227248	100.775113120502	104.095770107336
ENSMUSG00000002983	16.9295111972723	17.9162423662819	13.0260732334355	12.3441073533356
ENSMUSG00000002984	18.5516992401541	19.802301814733	21.8237826790331	21.385207700593
ENSMUSG00000002985	294.448816840011	327.464807395606	197.50360398512	138.804390837868
ENSMUSG00000002996	127.505732337122	114.789236479734	97.4014062708995	106.159939928482
ENSMUSG00000002997	55.0680198016213	56.0195967146551	57.4968572035036	54.4664289011379
ENSMUSG00000003031	65.2315598417166	59.5367781404157	76.8877234330874	65.1847208577535
ENSMUSG00000003032	8.78437183517081	9.13742625187035	15.5237907947971	21.691922375007
ENSMUSG00000003033	165.454485600604	154.140742408981	175.460631274258	186.834997874234
ENSMUSG00000003037	254.319750163812	244.250668756123	223.554583916342	222.168138256885
ENSMUSG00000003038	1053.20225255528	1109.68257162335	407.828129586919	270.617197252541
ENSMUSG00000003039	263.232830900653	271.452691830645	234.937588818343	208.856558010973
ENSMUSG00000003062	6.62424224491457	7.02815379905715	7.43131800562578	7.54205604499297
ENSMUSG00000003068	155.50912420903	147.504346593537	154.984741641073	144.223766705858
ENSMUSG00000003072	93.9697599405481	103.773620439258	86.7526279365521	94.5851052555762
ENSMUSG00000003099	18.1164892958635	19.6386129687298	22.5375997931594	22.7117586692689
ENSMUSG00000003119	36.3169076667274	31.5248571336686	34.2297400345821	34.3706299604932
ENSMUSG00000003123	81.4495756721446	71.5131414038338	54.3622054601952	53.8078537102992
ENSMUSG00000003131	28.3870530723736	30.1220627839313	36.2124563682207	37.7396513070493
ENSMUSG00000003134	127.660515814755	123.951229383741	126.72357428547	131.786925871177
ENSMUSG00000003135	25.511333394775	24.5385277748705	26.0990769881042	28.4626940915246
ENSMUSG00000003153	757.298649063577	674.169343919967	558.706652509629	531.518213540335
ENSMUSG00000003154	35.423148136615	30.3788975038854	30.28774430667	30.2365192749143
ENSMUSG00000003161	312.979989476673	322.248200514237	316.033356094196	296.320933714671
ENSMUSG00000003166	24.642132816234	26.0423615038523	27.2814822411704	26.2149816703838
ENSMUSG00000003184	34.0001925983619	31.9776759819798	28.5849168808728	29.8012753183836
ENSMUSG00000003190	2.97676013188277	4.26968046907554	3.37850848652094	3.37819410483421
ENSMUSG00000003198	6.85050311508337	6.52886844614764	5.32434804111216	5.74790047154922
ENSMUSG00000003199	59.3395107179307	59.4466098492654	68.467178348375	64.7128280169585
ENSMUSG00000003200	50.1122506000307	47.7693320008807	50.8605989196432	50.1556154067159
ENSMUSG00000003206	114.845876834511	98.7548467051376	79.5289396142576	74.6996721343841
ENSMUSG00000003208	15.8334677009015	17.2003878892244	14.9135685497134	14.8995311052119
ENSMUSG00000003226	51.7872707856841	58.9175992432379	51.9269057692317	59.5189308633959
ENSMUSG00000003228	22.0615214938351	20.6341101236585	27.1770830481718	22.9347711116548
ENSMUSG00000003233	12.8819238020473	13.1484925731839	13.4056645050031	14.4962585469314
ENSMUSG00000003234	42.565757314346	36.9485575890067	35.5259297000489	35.5624897729044
ENSMUSG00000003235	27.515160335406	26.4442085336068	27.5620634683092	30.238638826011
ENSMUSG00000003269	47.5208106603423	47.0444971408188	39.2345765095462	41.8647376029541
ENSMUSG00000003283	453.732008222444	434.245355715177	315.116063714038	339.590461008536
ENSMUSG00000003299	16.2927828343701	15.9392011900044	16.4950850411999	18.0215596446343
ENSMUSG00000003308	61.9595526219256	62.5233346408609	61.5342104799866	58.4569769034288
ENSMUSG00000003309	2.01327465926018	2.07576832234171	1.6052329763792	2.21558869749303
ENSMUSG00000003316	210.207786453765	188.827742085964	186.744384685265	195.549289171603
ENSMUSG00000003344	18.172669648829	15.9698407523521	21.4768399575614	21.4990188165865
ENSMUSG00000003345	136.44543334572	146.936374331684	154.368051956409	143.894551083963
ENSMUSG00000003346	60.3689762303766	61.7364248310329	61.5910735708646	58.6426269024151
ENSMUSG00000003348	349.898143442726	301.248906657764	291.947905968662	273.669532256782
ENSMUSG00000003360	64.0232838948114	66.3049073671603	77.9201762815396	75.9704370460341
ENSMUSG00000003363	93.2221626360448	96.0535150341914	69.9663199608755	57.2702950380473
ENSMUSG00000003379	57.4037540382175	57.3129905434075	76.561791867759	52.9215732846384
ENSMUSG00000003380	206.417358690125	224.086239731204	154.66545529672	129.634734459959
ENSMUSG00000003382	21.4770268952304	19.5443818686293	23.0349345867677	23.5604431099336
ENSMUSG00000003402	49.0611434128897	56.441915004976	55.3795100505674	61.9932761825102
ENSMUSG00000003418	1.87226964873831	2.53661298253154	1.4078353859389	1.15437903348648
ENSMUSG00000003420	27.2765550545817	29.2578118036517	34.6109320603119	24.861373630394
ENSMUSG00000003421	41.3548501749478	39.3579903838834	35.1946582645789	32.0373546313883
ENSMUSG00000003423	49.2632031789405	53.0930054135552	53.6857622549255	51.1204815150026
ENSMUSG00000003429	367.04996816551	382.35818986911	403.680052085192	392.201763790823
ENSMUSG00000003435	144.390727983012	134.014772546111	152.564264270622	138.650006232615
ENSMUSG00000003437	65.9545856233515	63.6988367808293	59.8714871117848	55.8302054214344
ENSMUSG00000003438	16.465321927449	17.6489528691874	18.7237837870891	20.8277812241985
ENSMUSG00000003444	5.5053016830983	5.30051694880611	5.91364637695842	6.08201050556085
ENSMUSG00000003458	65.2688620882962	60.7532844190047	94.5570155629573	85.006729646057
ENSMUSG00000003464	31.3246025806837	33.1536633709897	37.6301297268593	33.8455501698446
ENSMUSG00000003484	381.385695775883	363.815055037268	260.627917839424	233.770455976157
ENSMUSG00000003500	18.1488774725838	19.1166686484909	27.8235816547467	26.8515299937191
ENSMUSG00000003518	3.79272738780298	5.11991985957705	4.07318101932395	5.4231755834581
ENSMUSG00000003526	6.88437817673694	9.39326181801208	17.4476933792872	13.638251588413
ENSMUSG00000003527	21.5593078794147	22.1346626488937	21.1768220815424	22.2017284461768
ENSMUSG00000003528	15.9376093315375	17.8579918408056	18.1603277503456	17.8783986611598
ENSMUSG00000003531	11.1119065498469	12.7834914681043	15.1477292599895	12.6682616536855
ENSMUSG00000003534	1.21663077039629	2.93314003947998	2.63778042516626	2.15910546140783
ENSMUSG00000003541	31.0947786516916	32.0721715424268	22.4148980974498	17.0910176730164
ENSMUSG00000003545	9.87646488492491	10.1145089126328	4.58234147588526	2.67022415319121
ENSMUSG00000003546	54.1235497305108	48.7709044239212	45.6944211466433	34.5922705382142
ENSMUSG00000003549	8.46973128409383	9.49540726781556	1.38341395502161	1.28423418091616
ENSMUSG00000003559	3.47842116857296	3.26135285553372	9.05845092400836	9.66235847273411
ENSMUSG00000003573	5.10135539955546	5.02430336051979	9.03049246239051	7.8846033351022
ENSMUSG00000003575	6.10167691002563	5.51225284737198	6.27062169505817	6.92301307411232
ENSMUSG00000003581	3.6684415157298	3.83830533402018	4.15341073809454	4.03430894891431
ENSMUSG00000003585	2.2420464723967	2.27428982429305	1.54928541370774	0.983251987281685
ENSMUSG00000003604	3.66134482438326	4.37263344569711	3.41993928712	4.40009088411932
ENSMUSG00000003623	46.5389078404704	40.2817979243672	43.9438179446747	44.8080433490209
ENSMUSG00000003644	671.576024831072	596.83901411339	508.195959832581	509.910240597789
ENSMUSG00000003660	191.732518244705	169.570291448586	183.139813131485	183.088146413344
ENSMUSG00000003662	23.7983901807895	22.732995347431	22.1707333423386	22.6410443493499
ENSMUSG00000003680	12.2090120135485	12.9358456929806	13.0960314754495	13.3718377202587
ENSMUSG00000003721	6.65947499999686	8.14547628126234	8.19542561869105	8.92436683648581
ENSMUSG00000003731	23.2559475732565	25.7193279866682	22.3787068802613	24.5994541409475
ENSMUSG00000003746	11.9849904457099	14.0756043424027	14.5125958069498	14.9130142468349
ENSMUSG00000003752	6.08542728361864	5.57799194364777	3.8075468366621	5.02105136902239
ENSMUSG00000003762	18.5552968598749	20.9946025724001	15.3250397527517	14.4461880077154
ENSMUSG00000003778	37.5423793605475	39.0649612433586	35.6855985072493	38.5539832026469
ENSMUSG00000003779	42.3865962299262	42.1134205344943	44.2698429674317	54.9645493644984
ENSMUSG00000003808	19.4708445276122	23.8363130391404	31.4224517995705	33.4915255231436
ENSMUSG00000003809	3.95492388999201	4.34941109890235	4.39623307353006	4.7703819434941
ENSMUSG00000003810	23.7369821023019	22.0514647632741	30.8200748770372	30.8957691129425
ENSMUSG00000003812	12.6983837646186	16.1032874895885	11.9831603705296	11.2720729387443
ENSMUSG00000003813	36.9157335996236	40.6483564744586	34.2955963422806	33.4365461493155
ENSMUSG00000003814	454.951376559667	489.242568279855	368.524315904661	431.740589598131
ENSMUSG00000003824	3.65682081469533	3.81596670417811	5.7554639088327	5.21738542825989
ENSMUSG00000003847	25.4860526132165	24.194326077492	20.5343233243772	20.2495605058141
ENSMUSG00000003848	3.85357947870756	4.07852405687326	6.5379074478612	5.88158716621548
ENSMUSG00000003849	2.53298612963714	3.11402692528509	3.43324343345684	4.42746073285536
ENSMUSG00000003865	201.022537107276	177.613772523582	212.016095481158	211.09127426284
ENSMUSG00000003868	50.6917232020576	49.4326920533755	48.3728479578387	53.8820022713387
ENSMUSG00000003873	3.19602274966397	4.26852311815505	4.40461923668407	4.47469092554273
ENSMUSG00000003882	3.91766913160484	3.29156009971296	6.57735349264703	4.54143772495049
ENSMUSG00000003923	8.41623237056759	9.35803698305095	10.700620937275	11.3418441263971
ENSMUSG00000003929	1.97518971733279	2.1282243974764	3.00954012908121	3.27310623812143
ENSMUSG00000003948	4.36537546789639	4.1481040837859	3.40003503353867	2.79868809478445
ENSMUSG00000003949	4.08499977455984	5.21848349793976	4.22329452641755	4.14624178270999
ENSMUSG00000003955	6.67689464198824	9.17686278563134	8.20152582944317	7.70695513991814
ENSMUSG00000003970	548.41247030477	639.532706147468	559.261482257763	601.04958340332
ENSMUSG00000003992	4.51155020498881	5.20076889935118	11.9791874418597	12.4244118080297
ENSMUSG00000004018	2.94895391247009	2.30521896628015	3.99998838476599	3.95685010866586
ENSMUSG00000004032	2.10000032685367	2.50298639114711	1.70593412262176	2.30852596594226
ENSMUSG00000004040	241.761345386828	225.573603408301	175.683436962763	198.705050852504
ENSMUSG00000004043	17.6189829840696	15.6614674037896	15.0559958283265	15.4939870582371
ENSMUSG00000004044	1.29277048815464	1.06567138209537	1.9749212949708	1.19848744614362
ENSMUSG00000004054	202.070216563606	181.928084334878	186.886932277998	177.447548316282
ENSMUSG00000004056	266.731107963898	247.446113484697	163.371378066809	156.647486558899
ENSMUSG00000004069	7.0980890467342	6.13846373804101	8.83959400510336	9.58046788322373
ENSMUSG00000004070	85.2926239000473	81.1667745193213	71.9911419778952	72.3369186038456
ENSMUSG00000004071	5.55216928683975	5.57484805962316	7.40858985655958	7.68425211147812
ENSMUSG00000004085	3.86145579744571	5.08697317496939	3.61303297122235	4.22606528787643
ENSMUSG00000004096	64.1193707660822	69.7624988309321	60.5020719225504	60.0968016675881
ENSMUSG00000004098	2.17963703761241	1.53646892929327	3.85995504742985	3.14142043341355
ENSMUSG00000004099	103.007714865666	108.710186505657	139.228504963338	154.263262760382
ENSMUSG00000004100	5.56859959967074	6.09836783845603	4.91660485754	5.9405308117736
ENSMUSG00000004127	2.09517464055823	3.1062615385414	3.05402031843439	3.11867305533878
ENSMUSG00000004207	1652.21355429381	1515.65556685994	1597.00868656927	1484.8148471218
ENSMUSG00000004221	35.33862675399	32.5804203855298	40.0034243416645	35.2185581212854
ENSMUSG00000004233	1.33810112422217	2.37070727006479	2.41121073852587	2.43449366917727
ENSMUSG00000004263	4.88660725976072	5.08042885708469	5.86617231802279	4.93810372233588
ENSMUSG00000004264	64.2240476004499	72.3072243095731	70.2094231851761	75.8172582447101
ENSMUSG00000004266	776.000105091704	700.655601007767	671.446870605753	639.920798474511
ENSMUSG00000004268	41.4347260881807	48.2103352751194	40.0030737275772	43.9751820094118
ENSMUSG00000004270	32.8139550918651	32.466917931495	32.50025558298	36.5700596003636
ENSMUSG00000004285	95.3058548975433	110.218464687573	87.0364156491844	74.2706140538615
ENSMUSG00000004317	5.26023177551515	5.77425834436868	7.68728874862062	7.83809857746218
ENSMUSG00000004319	9.9502082425157	9.80556289501605	9.46630505512123	10.18412631368
ENSMUSG00000004356	5.50771311719386	5.01805531763015	5.06653000152936	6.83178502981686
ENSMUSG00000004359	9.89537126860056	11.1273846169037	9.47906983563296	6.76345109243424
ENSMUSG00000004364	107.384771570604	101.261296556098	110.612384007412	108.958541672005
ENSMUSG00000004383	1.54269617084766	1.79456472504578	2.35721369808418	1.54101853170318
ENSMUSG00000004393	8.65635972333644	8.2222365855382	11.8813749386343	12.6819231323141
ENSMUSG00000004394	19.5323017047478	19.056501487617	21.3304825386529	20.1207632590268
ENSMUSG00000004446	54.159824331126	47.6475370395469	52.6637781530906	48.321557240304
ENSMUSG00000004451	131.502961939274	137.355648739163	123.579042004657	123.784397443253
ENSMUSG00000004455	142.311891842807	140.049235397795	132.62704322408	138.961817848667
ENSMUSG00000004460	82.220379501303	95.164513798347	71.830499579185	74.2940833612846
ENSMUSG00000004462	4.98919785282386	5.71476982506916	5.17793810330411	5.41869539504766
ENSMUSG00000004500	4.0574034881535	2.80584662990698	5.86061181703341	6.16007795214392
ENSMUSG00000004508	36.4543881036639	35.1120822940845	31.8272176489201	29.1014269512639
ENSMUSG00000004530	131.806794249997	130.222617485307	90.6545835152791	101.990222836914
ENSMUSG00000004535	278.011290114075	271.457086491656	235.453169031133	229.884934551323
ENSMUSG00000004552	141.326933123642	112.392886140783	482.636010929783	427.275359306284
ENSMUSG00000004561	1.42419402099845	1.79682696067149	1.91301393324888	2.07547209602987
ENSMUSG00000004565	5.88879093836629	6.40826190532559	6.89642832639723	6.05683286772278
ENSMUSG00000004567	7.51317312837805	7.51776445156862	9.36203057089886	7.87495515672759
ENSMUSG00000004568	104.37148037305	87.5071327246994	83.8791785506579	93.3479987514677
ENSMUSG00000004591	22.754281649221	27.2321505580582	26.3750404298044	28.5302169186816
ENSMUSG00000004609	401.399998419044	346.323257876358	387.919829473348	326.341055705716
ENSMUSG00000004610	1.35541843093534	2.37186919520517	2.29593348147491	2.78441423206846
ENSMUSG00000004612	18.1958768882652	23.0727962583227	32.6947983923729	31.655058227233
ENSMUSG00000004626	457.242716927329	445.444328916899	259.145544767691	221.104980782984
ENSMUSG00000004633	2.67247098773811	2.48591646314708	1.80021168025468	1.89265686594138
ENSMUSG00000004637	2.59999972152624	3.4567539783093	4.02901174017525	4.88478403976578
ENSMUSG00000004642	50.4915931757454	53.9935876018303	66.3469462732763	67.9433138751678
ENSMUSG00000004655	15.2059045847266	17.035227557615	16.1799246130457	13.6459227191709
ENSMUSG00000004661	60.4198965637843	49.5598964544782	50.1508144723464	50.0566151260058
ENSMUSG00000004665	1742.38636504623	1735.58519022568	1420.12161722633	1396.25362268714
ENSMUSG00000004667	21.4647827977209	22.8367572745686	21.5830592160659	20.1892915464851
ENSMUSG00000004668	74.3064509148283	69.7117037734184	85.2618730966991	96.111291231076
ENSMUSG00000004677	225.294316028058	200.783630570736	234.80967895027	245.745600868796
ENSMUSG00000004698	2.99619460712735	2.36943062330001	4.44390647905523	3.15409385471151
ENSMUSG00000004707	16.2563612350375	18.3873398513596	13.6397388801245	10.9874481356249
ENSMUSG00000004709	4.31966283005588	6.81325139199276	2.99864198135406	2.69214013660861
ENSMUSG00000004730	51.810017485926	51.6815922550651	25.5949083986326	23.3916614405478
ENSMUSG00000004768	7.95750464921743	7.56701629441372	7.00933373535844	7.31466551324474
ENSMUSG00000004771	41.8900340239699	45.7248006370504	37.4069583117021	35.4810731306777
ENSMUSG00000004788	38.2346226802352	39.0972662227606	34.3085477351612	36.2611535602394
ENSMUSG00000004789	164.220974592206	151.404093135502	142.031625020834	145.940972144528
ENSMUSG00000004798	30.1560645231525	27.0220282492662	30.771583080832	30.6786958130753
ENSMUSG00000004815	4.68551528259205	4.30734991984662	4.32790829431829	4.35618114813738
ENSMUSG00000004837	5.64865068843856	5.76474371319838	7.39627119349504	5.74782947568063
ENSMUSG00000004843	28.5955065887615	33.5521367865109	28.5074237142777	29.6067114295289
ENSMUSG00000004846	131.496747432709	130.594825563057	81.0336305439498	90.7370868064826
ENSMUSG00000004849	34.8265359038723	43.533445729757	40.9281419931481	42.3003341505808
ENSMUSG00000004864	230.69898559646	205.972948227984	160.953338746117	151.776698908889
ENSMUSG00000004865	38.3137001967285	33.2638626401851	35.456264583084	40.573467511906
ENSMUSG00000004880	599.018093263124	542.517494874069	508.234015562613	520.157894643186
ENSMUSG00000004895	37.6021822037793	37.0198602780893	38.6566312234642	35.4458319572174
ENSMUSG00000004896	2.02339867184991	2.7235645453724	1.90713489172626	2.60040448789968
ENSMUSG00000004897	183.588442506787	199.960471330316	191.497683537645	186.051059248212
ENSMUSG00000004929	6.76988129094439	6.21892786941783	6.29399640162241	7.98065907483912
ENSMUSG00000004931	20.1187284429935	20.7031114393455	17.8835376123815	19.1966504216419
ENSMUSG00000004933	3.34147884503579	4.30004252803931	4.83734328143671	4.28404291839132
ENSMUSG00000004934	48.5242343994368	50.0803868295428	39.5336182451241	43.6158402909808
ENSMUSG00000004936	110.482585618514	105.132794977886	104.139002180425	101.474133619792
ENSMUSG00000004937	59.8788881385778	66.5834631866867	55.4878289686941	54.3542634041816
ENSMUSG00000004945	13.2741905756524	15.7761170755377	15.5264971809293	14.9886471570425
ENSMUSG00000004947	22.4467929478841	22.5960606661578	20.1130254608422	19.0083513537062
ENSMUSG00000004952	4.84840210298424	6.79672852017572	5.52683414689985	4.65295882191775
ENSMUSG00000004980	470.577454566352	533.829071529979	540.054093929136	530.768238315676
ENSMUSG00000004994	10.0721379719111	11.7429107290804	8.14682199519319	7.71922718706275
ENSMUSG00000004996	4.20631228813733	3.5852204083306	2.90104563811204	2.23284444547206
ENSMUSG00000005034	43.0842121055358	38.1353432744733	60.406379917224	57.9104792754759
ENSMUSG00000005043	17.5035918900549	18.2853653900866	26.6652378276598	20.9919078758342
ENSMUSG00000005054	24.8851001837357	26.0464738313775	22.5605553269543	24.3731457110684
ENSMUSG00000005057	22.1122651551001	20.0234292512391	8.46984393923904	10.2981761432002
ENSMUSG00000005069	43.6661834110994	46.0563572578963	43.0512468093985	40.6465382497516
ENSMUSG00000005078	12.6520397074712	15.681627777449	11.2968028036681	10.4473327461102
ENSMUSG00000005087	568.894191716833	581.965936910806	525.956343144651	572.299845808222
ENSMUSG00000005102	2.98123280116931	2.56106512854238	4.58073197509609	4.9460013831805
ENSMUSG00000005103	647.620942351766	623.606667544238	624.886803542019	658.803817058082
ENSMUSG00000005107	8.3106535252835	6.03169860117477	15.5879877205495	13.7090600912178
ENSMUSG00000005125	102.899064682956	87.2559754515458	99.594814066072	88.5894519059232
ENSMUSG00000005142	613.587605952374	517.958789934044	590.309430477267	574.026328425823
ENSMUSG00000005148	42.6691196631541	57.7626203331389	39.4369215519736	37.6273204856592
ENSMUSG00000005150	9.96289054072539	11.4404254798749	8.08773260818104	8.92628242207525
ENSMUSG00000005161	37.4760135905076	49.4052028298604	34.3970476207088	32.8645977171364
ENSMUSG00000005198	245.869534560595	202.459416081807	246.744116637451	236.973292276939
ENSMUSG00000005204	34.3903962077222	33.6883490194036	36.5802216784005	33.9540985542966
ENSMUSG00000005225	0.36697860436138	0.730721460500344	2.352101106225	3.77971761863423
ENSMUSG00000005233	25.0483685645028	31.2105186765395	34.0992017143079	33.491646112384
ENSMUSG00000005262	32.9426819378254	37.788815843056	32.8025727715482	27.5147490407307
ENSMUSG00000005299	41.1731203875916	43.057544599727	41.0900356727265	42.0675189236591
ENSMUSG00000005312	62.5666884892167	57.4236485902567	66.9760859576084	69.3854925626035
ENSMUSG00000005339	7.9155016495018	6.3401977304286	8.41832978357643	6.08253733499996
ENSMUSG00000005354	48.224183637378	61.2211576950468	34.9532418865595	38.0252622933287
ENSMUSG00000005360	2.74921947416103	1.96349753961022	1.33014782276908	0.888127578118881
ENSMUSG00000005362	19.1815062918212	17.6547796806769	23.1532625239117	24.3540018061485
ENSMUSG00000005370	23.2971228416945	26.8545224712099	27.5600842933042	31.0390327890113
ENSMUSG00000005371	28.8128089961752	26.5973893295769	36.2418827341162	37.1688140083327
ENSMUSG00000005374	11.6050653564797	10.4902794225799	11.1005632404192	14.887855417069
ENSMUSG00000005378	13.7439043139568	16.4743702118529	14.5777448443781	14.9479224092826
ENSMUSG00000005410	107.314261966599	119.033127080597	173.281620785421	195.203916458362
ENSMUSG00000005413	179.387580886495	186.163668181501	130.768838493737	122.268911240657
ENSMUSG00000005417	46.9562009112485	47.5322482107472	55.210019678533	50.0559854858078
ENSMUSG00000005442	113.412054219572	109.776190743791	115.786859118755	125.445498571928
ENSMUSG00000005447	6.57895337189833	6.97810368903069	14.5040195563748	8.29443920022779
ENSMUSG00000005469	25.0572181274083	24.8520762478768	28.6370699776247	28.6217502057185
ENSMUSG00000005470	31.9037101339802	37.4070621246871	54.8478073640462	55.8001550824484
ENSMUSG00000005481	29.7217056930376	34.2902739923681	34.2139920039885	36.1748939822881
ENSMUSG00000005483	57.1784850715242	56.5200112678421	62.1846412824909	58.2035096661192
ENSMUSG00000005501	1.55349584952341	2.09459147532883	1.41567593486133	1.86475454021644
ENSMUSG00000005505	16.5484418871436	14.6439091080247	14.8272989848229	15.5050525232672
ENSMUSG00000005506	37.6890211615794	39.6832494597247	42.7572355328811	43.1480894796436
ENSMUSG00000005510	18.2654423015318	22.2388938920431	20.4165387410221	20.4760023098449
ENSMUSG00000005514	351.162995289035	302.380213530889	287.685186674088	265.610275409407
ENSMUSG00000005533	242.684574219246	245.022800371378	209.280702625168	215.952552044682
ENSMUSG00000005534	37.5779414701166	34.9126444621419	38.224046969135	47.2387439582589
ENSMUSG00000005540	10.2095848798822	10.1915020533727	11.9533220625504	8.05137387565954
ENSMUSG00000005566	78.1533683505123	78.2431294734086	89.0563038737869	93.7396679167797
ENSMUSG00000005575	101.798191661876	112.166712681591	79.2102127179251	80.3315334039226
ENSMUSG00000005580	7.31593578599413	6.17952820491699	8.55478065129612	7.73970347996427
ENSMUSG00000005583	14.0741716572643	15.7194401770841	16.9358091642175	15.2493931985129
ENSMUSG00000005609	59.2647614379925	60.5097676157112	52.9134119985059	58.3616076896628
ENSMUSG00000005610	498.171307692007	488.665501382656	576.388893713541	626.657174072822
ENSMUSG00000005611	1.29943576009446	1.82573041623108	2.19048033819058	1.15543844843996
ENSMUSG00000005615	132.714703710228	111.078961507263	145.869978448396	143.838361835744
ENSMUSG00000005621	46.435010331486	42.5991739487525	47.127510979707	45.8658422126197
ENSMUSG00000005625	123.990866051864	125.945028402029	109.210549363082	97.5853102751503
ENSMUSG00000005656	100.538171013365	95.7181960989347	94.0398655784228	92.3546285883913
ENSMUSG00000005667	31.5142307830677	32.4115113708401	36.2261056919018	40.1068232876379
ENSMUSG00000005672	22.0932485310113	23.3485953821848	14.5452659107618	12.1683465705153
ENSMUSG00000005674	7.62278839640934	9.92910710026581	7.15786987550023	7.20599767277537
ENSMUSG00000005682	21.4293435906083	17.3381658704725	24.0458733618179	21.2228619512429
ENSMUSG00000005683	153.799276420223	141.050346192387	148.407561844233	154.477152993641
ENSMUSG00000005686	112.91476775971	89.850852810886	97.2361064055043	104.291510700334
ENSMUSG00000005687	20.4900435524887	24.2719632833112	19.5383955891399	21.2016967582425
ENSMUSG00000005698	119.373641745758	103.21669353626	128.794050474274	130.582827693128
ENSMUSG00000005699	2.6639522305471	2.61972633676886	2.45564474205232	2.87297785805346
ENSMUSG00000005718	1.55222571551009	1.4818955403846	1.81590963587075	2.38230039240552
ENSMUSG00000005732	6.50835579187786	9.95716851203331	8.59781464386293	10.0200183356073
ENSMUSG00000005774	7.90391482172594	7.64129965988511	8.44383036904016	8.00578987397847
ENSMUSG00000005779	113.253885530227	140.688240227838	117.979817093003	117.292495377271
ENSMUSG00000005800	4653.34761045749	4122.57641192627	2804.73719288326	2775.96666349726
ENSMUSG00000005802	0.927650683925336	0.670857475420556	2.44106021180118	1.91700119101761
ENSMUSG00000005803	347.227804762254	346.407674900267	250.532760599403	251.980564993317
ENSMUSG00000005804	30.8904446918833	29.846938811181	37.6211904474859	36.6185041564621
ENSMUSG00000005813	19.6143421811002	19.8019144819738	21.3723204538934	21.8638066230298
ENSMUSG00000005823	91.8194368789414	97.0058681885611	73.7496323001639	68.6163749872313
ENSMUSG00000005824	105.968652564243	99.4969123964648	83.4151580865574	69.6722908707819
ENSMUSG00000005846	15.9899750536502	17.4808188166547	17.6589068741686	21.5584797266654
ENSMUSG00000005871	22.2562431899366	20.3128773001758	19.0044286204715	23.3885119899109
ENSMUSG00000005873	124.545808580518	132.001626102106	105.452288263528	102.592668207935
ENSMUSG00000005881	67.9935096210461	72.5003382990121	62.1473143423081	56.725197298077
ENSMUSG00000005882	6.68193360234587	6.90386735893701	7.78361098892135	7.54384478562567
ENSMUSG00000005886	68.0031639623222	60.7000015026615	67.3991851451616	68.4006763891889
ENSMUSG00000005893	27.9243348195919	26.5444884762639	35.2404523803252	35.7201451833751
ENSMUSG00000005897	1.70386539658747	2.14070705813131	2.77068634194117	3.01517412902884
ENSMUSG00000005899	7.76246025690796	8.80692438509694	9.92566348814628	10.8208597994437
ENSMUSG00000005907	2.76998441350296	3.64163485504735	3.45684605102141	3.37989645441051
ENSMUSG00000005936	359.863862538434	312.523506919806	373.314843649837	378.903121864995
ENSMUSG00000005949	16.3715262618289	15.7659570377475	15.9422287863635	16.2756985925963
ENSMUSG00000005973	17.5726579253826	18.4638392540867	12.7146803927841	11.4532437807683
ENSMUSG00000005981	17.1553132084976	22.4679804370926	23.4226161464569	25.1148199230912
ENSMUSG00000005982	109.109702906923	94.8071872487565	102.837461481451	107.930426711309
ENSMUSG00000005983	2.81661614851085	3.62542985521334	3.19209036894184	2.30768443666862
ENSMUSG00000005986	17.8826844717357	15.1715329449967	9.84008208838585	11.1983029390468
ENSMUSG00000006005	162.018027807198	160.364458118216	173.93557237173	172.680267049671
ENSMUSG00000006010	11.3024003945309	14.7179480080569	11.4210965852209	13.1461487690359
ENSMUSG00000006019	25.5085309221637	24.5908594537003	16.3199508466725	16.3059610753258
ENSMUSG00000006021	8.76002062537371	10.7134796796053	12.8877080899714	12.4269496918559
ENSMUSG00000006024	65.3879027089801	63.4791366232498	62.6257161115622	54.7429845777977
ENSMUSG00000006050	49.8235602328309	46.6928181899325	35.9991593245688	38.2145269207348
ENSMUSG00000006057	24.5658650264157	26.4783048347225	24.0440519456214	25.56187736387
ENSMUSG00000006058	70.2611835437183	78.2408034075758	53.8434105841348	55.1365189648603
ENSMUSG00000006095	68.1497118968032	76.3625502449314	35.9859268378446	36.4688100440856
ENSMUSG00000006127	85.0405515705553	79.9638363196414	75.4406900832387	68.9843435931069
ENSMUSG00000006134	69.7591124638802	58.6137085543151	79.5412623553847	78.2836416666418
ENSMUSG00000006154	2.45627827957556	5.39583508583724	0.067582475127864	0.067582475127864
ENSMUSG00000006169	221.525627546577	192.58585231369	246.119694082678	237.928147936887
ENSMUSG00000006179	7.65616799030051	9.38938785996317	4.51671097400433	6.04559366259613
ENSMUSG00000006191	3.88491934378611	4.18630500823297	5.1161193890807	6.1059122015298
ENSMUSG00000006215	21.0718760457233	21.9206155196172	18.148798969082	18.6133461933047
ENSMUSG00000006235	2.55197253590889	3.53232029569754	2.51706398002544	1.58239435014785
ENSMUSG00000006262	7.10861798409668	7.14954703639546	6.48314964973692	6.84559413326544
ENSMUSG00000006273	358.973344569413	333.246808424568	317.384702433243	324.222033376886
ENSMUSG00000006276	40.6126019885121	37.3918221314724	37.7860009336708	40.4879864906017
ENSMUSG00000006281	17.2053169391998	17.62786210966	14.87056025498	16.3704219130822
ENSMUSG00000006288	15.4932647163644	19.259874422723	19.5674590048471	15.1600389219329
ENSMUSG00000006289	10.4799872824734	12.3096282115999	12.0609371770588	11.2310465406282
ENSMUSG00000006299	86.74676549456	96.9782371802666	68.8761080629118	62.5989821537751
ENSMUSG00000006301	4.94194504344009	3.97237119727294	3.9834416482037	4.46688690102729
ENSMUSG00000006304	1327.43766766414	1411.77571160652	1150.91228682171	1118.34470610021
ENSMUSG00000006307	62.265314934537	56.1096941031037	46.5973695011626	55.540729246847
ENSMUSG00000006315	9.610764555401	9.87956560498647	12.0857159649745	13.3413653735424
ENSMUSG00000006333	1309.51449172977	1503.94692141153	1260.41080963134	1293.35132122712
ENSMUSG00000006335	14.9130742740541	16.3102174254463	14.1756838623641	12.2043199970086
ENSMUSG00000006344	45.8862001381783	43.3406051172527	18.2790845269846	19.4353017313983
ENSMUSG00000006345	14.9974701805034	15.7751806051302	4.55695583932893	6.77156293551175
ENSMUSG00000006356	4.21540836461708	4.88921601901549	2.02026985319963	2.20641156971941
ENSMUSG00000006360	33.7850381628678	35.7031555019761	31.2851052614468	34.9833529601704
ENSMUSG00000006362	12.7017752483363	14.4327450429717	18.4827606152622	19.0714395950732
ENSMUSG00000006373	16.2206637335309	16.8761333660827	17.2821957713959	15.9141027922276
ENSMUSG00000006390	103.399904078265	102.131970356214	104.703140319571	105.446277281841
ENSMUSG00000006392	53.0461012835525	53.6804128882917	54.0692147895319	57.7313384367387
ENSMUSG00000006395	0.813306413004101	1.20851602594512	2.55161271483148	2.68889542012622
ENSMUSG00000006398	69.9865924153304	75.7331566704488	104.553127120553	102.167995719619
ENSMUSG00000006411	2.87608070033621	3.22408678236107	2.07473454317349	1.71765161805639
ENSMUSG00000006412	25.5627272831555	29.7202562103443	29.1184725439033	24.3574613055141
ENSMUSG00000006418	116.83807338374	112.073117784183	86.4168233708191	80.1053801952353
ENSMUSG00000006423	17.9797183024348	18.1649794100417	20.7317328683625	18.1720338762897
ENSMUSG00000006442	8.03674844446541	10.6856850493373	8.79000400741712	10.9489355572283
ENSMUSG00000006445	1.19884160878909	1.32254169659582	2.7012560241098	2.22049510077401
ENSMUSG00000006456	20.5711474881973	19.0294577717967	20.3712115510201	25.2116912036122
ENSMUSG00000006463	5.75667182440753	5.38324360136317	9.31423173869271	8.23476045948568
ENSMUSG00000006476	1.65392343443021	2.37273400514306	3.13226907249531	2.89023272145419
ENSMUSG00000006494	3.97124498777797	5.07765943072751	2.5178726731232	2.87096887010764
ENSMUSG00000006498	119.246947995312	124.846519992078	138.079664793796	154.467044936679
ENSMUSG00000006517	15.8034685196138	16.8076694167179	13.7463072563381	17.8128556011188
ENSMUSG00000006519	1515.58944669588	1677.80825714721	1139.16242348898	1030.7535727186
ENSMUSG00000006526	14.3646820792358	13.5771981799292	9.99589927577843	10.8761734626539
ENSMUSG00000006527	8.01952407515184	10.217504328241	13.7817118442258	13.5185211582028
ENSMUSG00000006574	17.8021085101349	24.6242444221848	15.8762646182084	12.0471048486273
ENSMUSG00000006585	18.8162304199542	21.5202934256473	30.0026075903877	33.0308273777564
ENSMUSG00000006589	112.965696080902	131.061139543315	129.512865912975	126.774918189838
ENSMUSG00000006599	21.8930717145004	23.9849185272144	25.7578909353777	24.6436931279312
ENSMUSG00000006611	8.52011722749118	9.34287301006713	6.11448676954895	6.09023867967897
ENSMUSG00000006638	0.517484947780694	0.543644654835987	5.77308289554296	6.06521140315479
ENSMUSG00000006641	1.3356760260254	0.843284981818913	1.54961526001852	1.885110291277
ENSMUSG00000006673	16.8328852959381	20.3911953358213	21.6143760497725	21.014442040538
ENSMUSG00000006676	107.690656053705	93.5664226000296	83.8428545965927	85.7737193714296
ENSMUSG00000006678	17.2843055815822	17.2500069154269	22.2461912120976	25.5914666912658
ENSMUSG00000006699	1051.39220301625	1032.29946301062	862.378491054761	867.938239221412
ENSMUSG00000006705	27.6541944373948	29.6458391604638	25.9029604127546	23.2738313663913
ENSMUSG00000006715	12.9005784626176	17.0784072692594	19.2273844056925	19.4843649991373
ENSMUSG00000006717	5.28860470408552	6.32499851661963	5.98970685919432	5.59784427830207
ENSMUSG00000006728	27.3370902287144	30.7678548199755	35.7177454210302	38.165067284643
ENSMUSG00000006731	107.711989203015	109.680232929153	131.757767463167	126.952130204808
ENSMUSG00000006732	2.6863218018522	3.69360384478613	2.9332180894865	2.69328973790228
ENSMUSG00000006736	10.160663778696	11.6138885666301	10.4848408809301	13.8902184806976
ENSMUSG00000006740	184.568850548246	240.667097113398	151.91619297772	172.53178800095
ENSMUSG00000006763	6.44217111065378	8.99788612693609	9.18469317038378	9.64420881151442
ENSMUSG00000006782	43.9610246471334	44.8769564096905	56.0840603986157	46.7188201325153
ENSMUSG00000006800	24.3331384829412	22.1345281391232	20.8331431683007	16.2174974445813
ENSMUSG00000006818	21.1680096439574	23.5595731614057	25.3920328922906	27.5514686047099
ENSMUSG00000006850	15.4386714730312	15.5421561226462	13.9982525107064	12.2256420972457
ENSMUSG00000006906	19.9029191384128	21.0038695968303	19.6355900299511	19.2681271302715
ENSMUSG00000006920	55.3680896958601	47.013621788955	43.6966876386141	45.6562000019136
ENSMUSG00000006932	144.424552118329	124.837011047361	182.381183924154	187.45475794096
ENSMUSG00000006941	39.0259380179314	39.8020725675842	38.5192588993468	35.573234446559
ENSMUSG00000006998	160.317011624331	167.359256582559	159.667255178571	170.87056670301
ENSMUSG00000007029	80.4550755017933	82.0053393636084	100.88033017111	100.507305332184
ENSMUSG00000007035	0.615390712709081	1.21899402448021	6.32541713032736	6.21977121807095
ENSMUSG00000007036	34.8851629517227	36.4820295643512	39.9167370589661	36.882146575442
ENSMUSG00000007038	100.582421127365	106.650777354726	85.7566800105928	81.0836429110604
ENSMUSG00000007039	2.14504056464596	3.45535829239929	2.30607997606562	1.69032238005582
ENSMUSG00000007041	442.045308835367	493.755854592165	370.107750588134	370.742601976467
ENSMUSG00000007050	12.2161251661454	13.971130917653	12.0268622251894	13.2301094221151
ENSMUSG00000007080	13.8326817792001	15.5431420354251	19.9114999540065	21.900677421277
ENSMUSG00000007338	9.9312090138971	10.2034937294542	15.1437129712145	13.828393006762
ENSMUSG00000007379	1.31213693877362	0.753379752598267	2.02033175908824	1.96684689990923
ENSMUSG00000007411	32.5942793267559	32.4258331729992	33.9182449919987	32.8059299596099
ENSMUSG00000007415	64.3962056048896	66.3528866710275	67.2833540941842	69.3364194518223
ENSMUSG00000007458	76.8321881342371	90.1830024030014	79.9406292064124	84.9220386281263
ENSMUSG00000007476	2.72170825001552	1.93202724477024	2.48628306162111	1.99299846131265
ENSMUSG00000007564	241.49174872298	228.030466392448	271.012615570585	266.48872396784
ENSMUSG00000007570	5.51238077208918	6.40997465076534	5.75160756543147	5.52797971226619
ENSMUSG00000007589	26.2438605030522	28.0559026612945	26.1384508570969	27.7425978054002
ENSMUSG00000007603	8.41477674236768	7.18167476370038	10.1447585174814	9.96672533181646
ENSMUSG00000007610	9.58050495601848	9.7790371453252	8.26446848119876	8.79685000510396
ENSMUSG00000007613	35.9741836535612	33.2980066087003	36.9665665123542	36.0617058169732
ENSMUSG00000007617	4.21998431139882	3.93738061317694	5.13835339888363	5.41647999749359
ENSMUSG00000007646	4.6270909970203	4.84024942693497	5.75743170705306	7.9517046039982
ENSMUSG00000007656	111.380989502352	133.991511359945	105.672916263354	101.125854108251
ENSMUSG00000007659	48.9603097854242	49.6358796474953	39.5409170257824	40.3529502180186
ENSMUSG00000007670	53.9358167046668	50.307660681739	59.0531891419586	63.0586335677775
ENSMUSG00000007682	1.96744922467391	2.39171606935246	3.23888572619815	2.83138522615392
ENSMUSG00000007721	113.919380114614	120.080015936235	105.264659090249	91.0450637132967
ENSMUSG00000007739	63.8678495592924	62.8942214385441	66.8357889207754	78.0203802874906
ENSMUSG00000007777	4.25035133842794	5.66297226699138	4.95126867680487	4.92082087431737
ENSMUSG00000007812	12.6444673798359	10.0825761497386	14.0926646775456	15.9290361430202
ENSMUSG00000007815	662.729867535079	677.924722399857	570.249366465544	549.050086020873
ENSMUSG00000007817	52.95792302384	50.3477135925392	68.0030766991069	71.4205401402088
ENSMUSG00000007827	1.22171953580983	2.3054670159024	2.318713803662	3.19561721522497
ENSMUSG00000007833	58.6088988035051	60.2273798460792	69.718842105025	66.4345768341952
ENSMUSG00000007836	117.511654736886	121.15188793601	147.015930041506	135.456563454559
ENSMUSG00000007837	12.712314145705	14.848947571048	9.30042111137479	9.32845067015913
ENSMUSG00000007850	57.6782363400125	66.0807741100824	61.991871631059	61.4803509858995
ENSMUSG00000007880	134.406075422609	119.995259251776	143.897719036489	143.697426513473
ENSMUSG00000007891	579.430849171168	625.906721081247	381.069789173294	384.989273996791
ENSMUSG00000007892	364.928356513104	446.387196734651	405.725900957616	451.551459395773
ENSMUSG00000007950	7.87051590382333	7.81753433862476	7.00790585121852	7.68755200791026
ENSMUSG00000007987	2.73506733444411	2.64264463020601	2.59860844155323	3.08550101948336
ENSMUSG00000008035	170.716245562799	158.415417502252	195.141779754588	174.250805472066
ENSMUSG00000008036	149.475666159412	186.464592791977	132.564461723687	130.06170834946
ENSMUSG00000008140	40.6616871907839	43.9960755655393	48.4541622841988	46.4993955397584
ENSMUSG00000008153	0.835881770561691	1.16435571313732	1.73257856781381	1.86715439327135
ENSMUSG00000008193	25.5347791435626	23.7295666082175	63.1461261992895	43.1728700303934
ENSMUSG00000008200	13.8805445706187	14.1641222504853	13.4698306597099	11.7506441702536
ENSMUSG00000008206	1.0543852602858	1.80579982053793	1.57985649239333	1.27620195035692
ENSMUSG00000008226	10.8356681732512	11.0463106733882	10.0409583007604	10.04149638275
ENSMUSG00000008301	16.1708611417799	15.9973394891065	12.7233619553294	14.7081168238139
ENSMUSG00000008305	6.4095960908766	5.67673993599936	6.55317000992654	7.28975525426293
ENSMUSG00000008318	56.5553519186329	54.5713037806127	47.3730149612309	42.8037196123
ENSMUSG00000008333	27.2491893596998	39.6986342386351	23.5673437481519	25.7185448346216
ENSMUSG00000008348	129.793071467307	119.198886114673	39.1724109161105	38.1648962395322
ENSMUSG00000008373	29.4358246752382	34.6060242828498	32.8700385333862	32.6774606518172
ENSMUSG00000008384	41.3120560563328	46.4260788345115	30.412557935378	27.1422049656866
ENSMUSG00000008393	191.189991391967	181.303973594511	171.959059535406	167.764350502073
ENSMUSG00000008398	14.2809508647271	14.9833888409837	28.1335303463789	23.9516585970453
ENSMUSG00000008429	55.7624280837068	49.6844859192796	50.2299116188928	50.0217918597786
ENSMUSG00000008450	8.48671596302908	7.47541431288667	9.05784787716146	10.0601288680998
ENSMUSG00000008475	1209.92861658604	1194.03844751954	992.783204831126	962.936554252536
ENSMUSG00000008496	28.166295551118	30.4831905561496	24.6649832566202	24.0778586044646
ENSMUSG00000008540	402.651503133828	403.329175253227	280.785807151182	257.514975760289
ENSMUSG00000008604	16.0878728959243	17.1787518449179	14.7263316246911	16.8423919305778
ENSMUSG00000008668	345.333515352266	412.061413908584	327.138394730062	320.771732570311
ENSMUSG00000008682	289.76362307594	291.729406353191	302.748909570954	348.651470642101
ENSMUSG00000008683	213.156040568965	240.851178191475	214.577623518562	230.242791863185
ENSMUSG00000008690	108.327773082044	116.679170504056	138.342522825046	140.148331802778
ENSMUSG00000008730	310.821448327934	259.20703245356	384.837164896876	449.744729870621
ENSMUSG00000008763	24.6546091721823	25.7420857771527	31.2192101962871	32.2355303737982
ENSMUSG00000008822	9.52516591309178	11.5905470036407	9.02720370737122	10.0146149653623
ENSMUSG00000008843	4.98296566593401	5.07975367314488	3.18121457876014	3.23164790064424
ENSMUSG00000008845	48.3440662523322	56.5660662447973	30.3788384448647	25.1084129570416
ENSMUSG00000008855	61.8520789716739	60.3104240927196	71.1536377064932	64.701388939071
ENSMUSG00000008859	60.8433844743042	68.5775923872774	52.7638959586563	52.1083210521142
ENSMUSG00000008892	55.2000909867652	57.97059419682	62.8801859581274	66.9858677738514
ENSMUSG00000008958	40.6231736820739	39.490461593401	29.4199492135892	28.1349037293816
ENSMUSG00000008976	24.4643642916482	24.986587754028	30.5303949135844	33.0529552095002
ENSMUSG00000009013	111.464305825489	99.6521469921113	93.6925762461736	102.284941033352
ENSMUSG00000009030	35.6632455913025	34.5794740383583	35.2633078311546	33.7342256644704
ENSMUSG00000009035	79.6578003289797	66.2175840804694	73.4099838316941	73.8984986133324
ENSMUSG00000009073	23.4351762646222	24.5644679058946	32.9461128655256	33.2690513138401
ENSMUSG00000009076	22.775363592879	27.5920528300622	11.4174049678002	8.85930235101078
ENSMUSG00000009079	120.826807852948	126.223607338478	131.651500667389	121.289610787568
ENSMUSG00000009090	86.2065328359135	81.1908337358084	85.8293680325249	86.8259377190477
ENSMUSG00000009112	40.5710046931574	35.840551709978	46.3833191587337	51.4329235425902
ENSMUSG00000009207	25.2052220239737	26.6745436401844	27.7200172916031	24.9528198802785
ENSMUSG00000009248	3.89570975288614	3.12984943436285	3.00162235381354	2.43228938232188
ENSMUSG00000009291	108.639621509647	101.406129337731	98.8963951968621	92.7465891266798
ENSMUSG00000009292	129.223000831381	106.21256113319	82.7917168510811	80.6331871433369
ENSMUSG00000009293	31.1352086456924	34.1924387088147	39.1334324737086	39.7641365521583
ENSMUSG00000009350	704.377832097327	915.223573097916	1506.50606436661	1688.06591586074
ENSMUSG00000009376	1.9424716298096	2.03261956157736	2.89754159166872	4.82764409655101
ENSMUSG00000009406	11.6163776683504	10.6981831481898	11.0985343474944	11.4456177820427
ENSMUSG00000009418	9.98677214196322	11.2338778322236	7.37392786925322	7.35381423360066
ENSMUSG00000009470	50.0236852715552	49.9085401429276	70.0408190482796	71.5352064867055
ENSMUSG00000009535	10.3408153724095	12.3432272182576	11.8317004296337	12.3538263035014
ENSMUSG00000009549	60.9763105551411	66.2518699551077	43.145462244261	38.3933785144314
ENSMUSG00000009555	105.833732231493	109.984338733446	96.031301548149	89.082609497961
ENSMUSG00000009563	23.8184556349897	23.958933491517	23.1223822907262	22.1166506143607
ENSMUSG00000009566	1.70042765151162	2.79643245092369	2.21704432887409	2.42816024609407
ENSMUSG00000009569	4.39385646118806	2.95087755274792	5.15029918056118	4.34178579522857
ENSMUSG00000009575	27.0326450053307	28.6210966302769	32.6954627023987	40.161856553284
ENSMUSG00000009585	38.9690444392515	41.2011917337962	11.1852301070683	12.2046909786995
ENSMUSG00000009621	9.80375912121824	9.22267152961464	9.76399906528257	9.12947384889267
ENSMUSG00000009628	20.2645595725851	16.8290371784015	43.5986004218007	47.3286588344001
ENSMUSG00000009630	65.8237250541487	78.8469915938235	52.3932481103257	57.6489553666336
ENSMUSG00000009633	91.1176529909042	120.618161302735	109.529718646307	94.3900045769069
ENSMUSG00000009640	14.5074670338644	15.5171455077096	13.9844289388027	12.7309855039659
ENSMUSG00000009647	71.3476192181436	68.6501997043057	70.6329826535068	71.8745365295938
ENSMUSG00000009681	37.4399465640716	34.7683963484119	34.9975128103695	33.8379158282634
ENSMUSG00000009687	621.90408013527	624.390426477943	265.165496603039	248.344566029391
ENSMUSG00000009739	2.19958000512548	1.44064781560685	1.75925554703919	1.19174267227948
ENSMUSG00000009741	43.7681708502349	40.306232018984	44.6327466605514	47.0016181667448
ENSMUSG00000009772	33.3840901384966	31.8071625718314	23.9683960066671	29.160675574198
ENSMUSG00000009863	70.0037585570429	76.0343800315693	60.3357626138161	56.6811082011277
ENSMUSG00000009894	3.84366079329935	3.88818955003312	5.29591532158608	5.01233191925086
ENSMUSG00000009905	2.81484465954034	3.17961949675322	3.49036414190601	2.88671645631406
ENSMUSG00000009907	111.231326678718	105.649487983138	101.636172814574	102.186568939551
ENSMUSG00000009927	291.584834053099	315.788830892326	321.128112651678	331.655245345191
ENSMUSG00000009995	26.5288376128288	23.7134480309479	24.6136135061031	21.814014787368
ENSMUSG00000010025	114.437359082173	94.4440606642046	113.434236677746	109.369687314763
ENSMUSG00000010045	34.8988994787986	31.2230381280832	34.8058721685769	32.9047356278128
ENSMUSG00000010047	2.69717952839898	3.3072960033143	2.60055099371609	3.12915369514146
ENSMUSG00000010048	9.34447550943824	10.9618962718097	10.4465986273995	11.5661174551022
ENSMUSG00000010054	14.0214769609846	15.3611085157421	16.7738310407995	16.4140664292075
ENSMUSG00000010057	6.33926377111663	7.10169077217594	7.30837817238211	9.18514004764569
ENSMUSG00000010067	6.28927060536305	9.07364528479666	7.4448824519593	6.97755513271822
ENSMUSG00000010095	68.8154842822526	66.2817682598819	69.7328202654664	62.4602760386064
ENSMUSG00000010097	33.2790111511048	31.125905297614	29.0969053696681	30.4608231737341
ENSMUSG00000010110	69.0173420107891	61.924836364671	61.9110076021651	63.3976048271823
ENSMUSG00000010142	14.743235134091	14.7119713930584	26.3651175478854	20.7620721135953
ENSMUSG00000010277	87.6332241073546	83.7667898754892	107.170188577971	110.068711407573
ENSMUSG00000010290	7.92868397339385	6.45747107520615	5.94792722424414	8.0446010906986
ENSMUSG00000010307	9.18373615413579	12.6739592910336	6.92363880136476	6.29110319712686
ENSMUSG00000010358	32.9037060672627	37.0795597089263	20.3674430196023	18.2978838210189
ENSMUSG00000010362	13.9241871198765	15.8618213515463	12.7630012723297	13.2473695141195
ENSMUSG00000010376	83.8531278867956	95.1515451503488	71.4404788739298	64.8465846300783
ENSMUSG00000010392	24.5300526774991	25.8291178228645	24.5355680558548	23.9098493806937
ENSMUSG00000010406	5.44678500450777	6.39313287426294	5.62260846016755	7.16441613092196
ENSMUSG00000010453	15.6585315613362	12.960130239727	19.9873005750416	17.9794966376743
ENSMUSG00000010517	40.1858021912884	38.5399947229002	41.8473652386853	46.9304093263454
ENSMUSG00000010554	7.99106782272291	6.91766662492008	7.65609396761093	9.17666689475663
ENSMUSG00000010607	14.9854505258677	16.217457357267	14.3043738678617	13.7431909509136
ENSMUSG00000010608	142.030092168973	213.179955799264	129.209591579774	102.005268777472
ENSMUSG00000010609	35.375012295618	32.3408755462512	31.8415255734267	30.9859809479266
ENSMUSG00000010663	8.86643608429736	9.87860807269524	13.4744194835604	15.172166209934
ENSMUSG00000010755	23.0853667961035	23.2172769317937	22.0905850525968	25.1376489980466
ENSMUSG00000010911	8.10287594905466	8.06282049931591	4.73648176899878	6.12984552427178
ENSMUSG00000010914	6.26905730004032	6.60265937517144	6.65038935983138	7.54426357901989
ENSMUSG00000010936	33.3663906704323	30.1448289776832	37.5603180993858	37.0495495656404
ENSMUSG00000011096	14.1546525320945	16.5729947938128	14.2919195600561	14.2707410686786
ENSMUSG00000011114	58.6390276315561	53.7888402183393	61.1765866597544	59.3814040697487
ENSMUSG00000011148	214.110710281305	215.932088207456	211.151900408676	200.87279801162
ENSMUSG00000011158	26.7404790486743	27.6434894788807	31.976288435299	30.3218369018433
ENSMUSG00000011179	26.834906155347	33.0090074771556	17.561042611649	19.7750960101126
ENSMUSG00000011254	2.1277497092545	2.66600208986939	4.12341696119585	4.84948468054435
ENSMUSG00000011256	144.359728896452	120.888743095573	120.867203671054	123.683864584003
ENSMUSG00000011257	44.7921468809348	56.5962634660029	53.967755197621	59.1976492027402
ENSMUSG00000011263	1.53935061940491	1.93446002118496	0.7868884636191	0.620661060272614
ENSMUSG00000011267	6.3832227601266	4.39066431819542	6.15848445999729	5.000681740777
ENSMUSG00000011305	1.95972125651232	2.4183449751187	2.63088109944544	2.78863234449693
ENSMUSG00000011306	50.5900581146659	49.6115282941535	43.3316294261506	40.2098075944755
ENSMUSG00000011382	2.97270555008634	2.73835348051864	3.73241241916613	3.96925482342203
ENSMUSG00000011427	7.22792710652346	7.47134295965616	7.35311516593156	7.95379562538554
ENSMUSG00000011658	1.89892749598974	2.91167589285119	3.6582431740153	3.77141132255184
ENSMUSG00000011752	125.697163321212	129.652630286465	187.661048004925	197.456601864952
ENSMUSG00000011831	13.1125668591516	16.5558318996584	13.4290070277352	15.9804180312895
ENSMUSG00000011832	16.9191152258735	15.4193974987189	17.8606487997925	14.6784248501387
ENSMUSG00000011837	13.8426988080792	14.0448996488756	13.3783616739441	13.1740491172672
ENSMUSG00000011877	28.6062332375216	24.9011352947336	29.7770438068853	27.8682409330308
ENSMUSG00000011884	92.8751286515101	90.1046747722797	98.4715426767835	99.226730928075
ENSMUSG00000011958	125.836707910008	124.587877868806	129.477000354168	126.751548899128
ENSMUSG00000011960	43.1688766373025	45.7488073703864	38.0670566287626	41.4229838898507
ENSMUSG00000012076	1.83974202087355	1.97921474287924	3.09615111765149	2.79458118256905
ENSMUSG00000012114	41.4505384619561	35.0661563351746	38.8821740127227	38.9493814867105
ENSMUSG00000012117	142.973532946782	126.766739605871	146.825928448616	149.948830917595
ENSMUSG00000012126	2.57647578586967	3.57293334701547	2.54780658037237	3.20867370879041
ENSMUSG00000012296	10.3376341455692	10.5376117223034	11.1441413105418	11.7810650379353
ENSMUSG00000012405	142.244861602412	158.697275932289	180.067320775924	194.512534528167
ENSMUSG00000012422	34.2951227349404	37.8320083426106	34.2745435338113	35.8768797007459
ENSMUSG00000012428	11.1708162852118	16.2791756167881	5.94582988614537	9.65928694902679
ENSMUSG00000012429	14.1147239157884	13.164852091852	10.5919356733403	10.7129882933811
ENSMUSG00000012443	59.1648023079352	57.9548609633351	80.6201730210704	93.6364489726633
ENSMUSG00000012483	7.69512717107468	9.47236467454392	10.6031364491811	11.3883366750729
ENSMUSG00000012519	9.32035000509525	10.9213033225799	7.5909575500965	7.70650357478613
ENSMUSG00000012535	57.6080388392593	68.2895946054062	60.5839815515025	63.1872131404489
ENSMUSG00000012609	5.72932102335278	5.56587199540204	6.16753546641866	6.01583287569101
ENSMUSG00000012640	9.44206284937411	8.64607837211428	9.54308319311496	10.2014232168623
ENSMUSG00000012819	3.16207569731389	2.26042875220631	2.33674619332753	3.08650068616912
ENSMUSG00000012848	352.460552112906	397.909915834247	399.430946873089	419.545308590614
ENSMUSG00000013089	5.30990259075318	6.51644512318291	5.97496102277206	4.85416304046192
ENSMUSG00000013150	3.43732738684576	3.0172135521442	7.73706276446802	6.73629338664122
ENSMUSG00000013155	5.07866168081312	5.13689726578975	7.51405300900325	6.79279229061047
ENSMUSG00000013160	208.557733821072	198.576196237249	184.047125542294	190.545818216182
ENSMUSG00000013236	4.35110965346905	3.38177322836578	6.18581171133688	4.77265967763505
ENSMUSG00000013275	1.90682649671802	1.50205574024707	1.99864504743997	2.63394018965811
ENSMUSG00000013465	89.1114174865423	78.3399708224596	76.6405916886759	77.2587657363932
ENSMUSG00000013495	9.25915109090346	8.77785803682767	7.44804240739362	8.45254306399777
ENSMUSG00000013539	7.53620343047297	7.42855860002318	7.74429082209298	7.50582694087113
ENSMUSG00000013593	98.4445868595826	106.395252988808	89.7152171952088	91.2559339263719
ENSMUSG00000013622	16.6215880755104	16.5928462384638	15.2400738819331	12.1247954829917
ENSMUSG00000013629	16.7339981764036	21.0610535966605	17.9393644751248	20.7742935986679
ENSMUSG00000013646	53.9242661150432	45.8796557344953	57.4965868247638	55.8649153628345
ENSMUSG00000013662	24.8256404136535	24.4736074645623	26.3863588782857	27.4925774378413
ENSMUSG00000013663	341.322033303448	305.986411088275	315.191257370644	332.563426690955
ENSMUSG00000013698	13.1593098863439	14.5064454562417	12.7008932219191	11.9018957075706
ENSMUSG00000013701	22.8103043862417	24.9796723904546	23.3721039436898	28.5429166576474
ENSMUSG00000013707	159.464589991901	145.502878923493	110.825146363035	106.893678611013
ENSMUSG00000013736	15.5399300572718	15.7867137810958	14.1979647967106	15.0373462472266
ENSMUSG00000013787	54.238385625616	50.9615090564986	68.4462761525492	75.6124823647483
ENSMUSG00000013822	26.3830230585421	30.7876806134368	30.1588897922084	29.4567560245541
ENSMUSG00000013833	51.8566674985194	45.57363190509	53.2403099001869	53.5347804843168
ENSMUSG00000013846	44.935724446151	43.0473437471622	50.5877947758899	49.2969700590111
ENSMUSG00000013858	44.5094632880702	47.6022947593871	43.3511387897162	38.8140120138977
ENSMUSG00000013878	4.77925272091916	5.86486857962121	4.97107143292735	5.04006566239813
ENSMUSG00000013936	7.30247938033971	8.10911639964896	2.62269941765794	1.70594295947353
ENSMUSG00000013973	28.8766456151886	27.0300217124286	32.1798608951631	28.604398075528
ENSMUSG00000013974	698.166477626581	720.22959222342	438.696926554726	432.722606036046
ENSMUSG00000013997	22.5006820732675	21.4972610939469	15.8451571465461	15.9123415836196
ENSMUSG00000014030	20.6964511138919	22.6143721989976	29.7596226564778	19.2082147578767
ENSMUSG00000014039	5.62406936041917	4.01334150946017	9.21219918306344	8.02027712693208
ENSMUSG00000014074	21.0757888558916	26.4398972151852	34.0550895236766	34.439905919278
ENSMUSG00000014075	16.9602158028989	20.0023084637669	21.6116652683873	18.1139165971368
ENSMUSG00000014077	348.620865710724	320.439323068493	299.96083054837	307.901760942807
ENSMUSG00000014177	6.07359259001659	5.96986338969828	6.0010282834602	6.07464307881689
ENSMUSG00000014195	84.9464911973542	90.7235226172466	75.5075588602276	69.3787709509426
ENSMUSG00000014226	20.2201714471314	25.3889390158368	18.002664564567	23.3063411590045
ENSMUSG00000014232	6.42372730421549	6.42626696956458	6.46595147184948	5.59639351978177
ENSMUSG00000014245	6.56251837403961	5.66716326836015	6.85565747655932	5.18773426724706
ENSMUSG00000014294	49.0758350018927	67.3823273919072	39.9300033916103	43.1004488093691
ENSMUSG00000014301	2.39735323270974	2.22906036684093	2.89866922878763	3.65033790885266
ENSMUSG00000014313	58.1597124074075	78.2711950610689	52.2096456802214	58.8721293748567
ENSMUSG00000014349	59.7538554859636	65.9766139411468	63.9983906559166	67.355430369176
ENSMUSG00000014353	3.78814760972021	4.66832825294052	4.70552172486613	4.47808680993916
ENSMUSG00000014355	43.7977673828128	39.8146572565334	50.8156323588659	57.6853586027493
ENSMUSG00000014361	15.2694757323344	19.2941731103327	9.98885816579067	7.93755302858393
ENSMUSG00000014402	29.666122893651	31.2382990008732	29.6305142489281	29.2252662260847
ENSMUSG00000014418	14.7511708926521	12.9168144989245	13.0958720084753	14.8532166492734
ENSMUSG00000014426	20.3676381472212	16.2947245035975	23.8199808292287	24.7465245368224
ENSMUSG00000014444	22.0716209202916	21.1284545609144	24.1204125757627	31.8968520306148
ENSMUSG00000014453	5.61489509603048	4.67325823086662	9.25094511300325	4.92541597369267
ENSMUSG00000014470	59.9367755362399	58.7889132335814	67.2357856412971	58.8832935350966
ENSMUSG00000014496	20.1693080636556	23.2253285119793	36.7549869442704	39.776248119241
ENSMUSG00000014498	26.9604404273014	28.1335483886429	31.0788442556976	36.3968529083772
ENSMUSG00000014504	20.1122344111711	27.3522107606791	18.8468079926072	19.645669123206
ENSMUSG00000014543	28.3011002740422	30.0224576933099	46.4290064881071	54.6223780747274
ENSMUSG00000014547	77.9968809220344	63.8629149700222	59.9605905043368	63.2977483765102
ENSMUSG00000014550	18.4134209283997	16.0376503658423	20.1441241266311	21.3528251521037
ENSMUSG00000014551	9.92983860313466	11.8570646642134	9.83656340454872	11.0162778628285
ENSMUSG00000014554	13.5160191145572	15.1034825396488	11.8425203371636	11.4533856382353
ENSMUSG00000014592	1.81658814469219	2.31838713134727	3.09981910844697	2.8496408978904
ENSMUSG00000014599	26.3263029581316	28.8797279411791	15.8063490097254	15.5711753919338
ENSMUSG00000014601	64.4601682730164	57.3858396609436	57.3617049517429	56.564696759834
ENSMUSG00000014606	132.176792747838	124.818242079999	116.998350267536	110.293298755857
ENSMUSG00000014633	9.09244060954007	11.4942361035323	15.7735896637311	17.4239304241328
ENSMUSG00000014668	71.7316889730237	65.8747545280278	71.520772073195	70.44598450458
ENSMUSG00000014748	61.0069386423931	66.5696576069016	40.2449021616398	37.4585225690675
ENSMUSG00000014763	24.5592107001721	22.5277057689202	21.1995383216008	20.8366127117339
ENSMUSG00000014767	13.947497238515	15.5314374177978	14.5446191147582	15.5610376675948
ENSMUSG00000014769	104.677586210862	125.557676661336	97.1002439390608	100.232238275621
ENSMUSG00000014771	5.73167823949535	6.467495431668	7.66735020421584	8.05060818283181
ENSMUSG00000014778	43.0469793935381	42.4019752911081	28.123136856971	30.2749241773207
ENSMUSG00000014850	6.34403507321661	4.96492393394326	3.45854138668178	2.8022583635249
ENSMUSG00000014856	18.0220666777173	20.3601624350745	11.6659877393546	13.483148194652
ENSMUSG00000014859	31.2339294170658	26.293741388378	30.2504785219462	35.2744501156929
ENSMUSG00000014867	244.322708448956	249.216233016469	354.630232882839	356.931933936221
ENSMUSG00000014873	1.96502365486802	2.08937894723288	2.59257889420818	2.29734414557566
ENSMUSG00000014905	21.0515395123234	18.9631818752694	25.436578863356	25.7277819331631
ENSMUSG00000014907	1.57609585855174	2.16602152993344	2.5356848546493	2.92197641458904
ENSMUSG00000014956	247.742200281718	273.869511538723	221.864062493026	240.008263456151
ENSMUSG00000014959	49.6298921059856	50.8246329531683	46.7489086016776	55.4089342051584
ENSMUSG00000015002	16.9586447358193	20.278095804461	26.4422562953668	27.3908164537867
ENSMUSG00000015013	30.1746830316545	31.9232467115568	38.5379397408692	36.3966590812967
ENSMUSG00000015016	5.87284408056866	5.37111177798733	3.77273686493164	3.76211571985744
ENSMUSG00000015023	18.2322268103978	16.9107574612784	18.1724361252757	19.4269959715435
ENSMUSG00000015027	155.340311818976	143.306586331748	162.224295453422	159.982551889792
ENSMUSG00000015053	19.9070751921489	13.455173459065	21.1474645156026	16.0281280719823
ENSMUSG00000015087	23.8631503728798	28.6420191613188	32.3575748557014	31.7514762285461
ENSMUSG00000015092	139.456440053032	155.897037462846	109.765197364368	102.778230174923
ENSMUSG00000015095	18.9942228061381	19.0773229288403	20.0850957521177	18.0154463889334
ENSMUSG00000015112	3.39315139854685	3.08769580185848	5.30800049292185	6.93597651116427
ENSMUSG00000015120	83.4601615271418	86.8617602255121	70.3897240854794	68.3475414986582
ENSMUSG00000015126	7.12146043890896	6.96891520463481	6.33250550229339	7.34708735995351
ENSMUSG00000015127	8.55218024279733	7.12629244353827	3.97190394143755	4.5599460281044
ENSMUSG00000015133	16.9498265585674	15.8260519986441	17.9537838356151	18.3343487055712
ENSMUSG00000015143	1869.44247377224	1608.1146920389	1324.07397288572	1300.62626157523
ENSMUSG00000015149	77.4540573269089	79.3063918630924	58.8332299192587	60.4128990073281
ENSMUSG00000015165	167.605906484805	175.45409614358	202.016814290965	182.707946424917
ENSMUSG00000015176	23.770638285363	23.5633255816806	28.7744847519968	31.7263910350786
ENSMUSG00000015189	23.4983870073446	23.0634707277005	25.2641474152688	26.3037142702727
ENSMUSG00000015202	1.81861868365286	1.70533385244697	1.84461499859302	1.94939494766954
ENSMUSG00000015214	19.2717893706852	18.8425663474371	23.1323848529885	25.161596515402
ENSMUSG00000015217	15.0683950336145	18.6271533879102	22.5855379366591	22.3288623326035
ENSMUSG00000015243	15.689090978298	16.897970138657	9.97907755168791	7.78725711042747
ENSMUSG00000015247	16.1818284871459	18.0509919506991	19.5604550519566	19.8969180906511
ENSMUSG00000015289	10.7812541381678	11.8559268180941	15.0904059146372	13.5950281899893
ENSMUSG00000015290	28.295112262674	28.9353354230514	31.2586126733601	28.9915891047159
ENSMUSG00000015291	146.725029290326	142.973076694685	150.444847120384	124.239831605733
ENSMUSG00000015305	6.44735500420921	7.60514336871872	3.06362752302076	2.87618351751041
ENSMUSG00000015312	29.233742217347	31.2163845119935	26.1218400346054	21.1762519120126
ENSMUSG00000015314	2.51723516309301	2.71976161898821	4.38124251902806	2.80566747508909
ENSMUSG00000015335	4.21477715910044	3.50607219477191	3.31246550235359	4.38723994831578
ENSMUSG00000015340	3162.97093373318	2755.62909496715	3461.62698237601	3380.19130628971
ENSMUSG00000015341	42.2606743731255	41.6351616997729	41.7624370373334	40.2740863387014
ENSMUSG00000015342	10.8639965031772	8.98917721577504	14.2902110794023	16.3041835429631
ENSMUSG00000015355	11.7515980641416	12.2076430033809	15.6747896845783	16.1398302574727
ENSMUSG00000015357	19.7297189376051	20.5124220826807	20.7846778259923	18.6494904692655
ENSMUSG00000015363	108.021619996623	110.629879252259	106.462064663159	108.10496643569
ENSMUSG00000015396	4.9466879313644	5.50711551748458	2.24212948416766	2.12519903248815
ENSMUSG00000015461	92.6085390846373	87.6651203913758	67.9527333430265	68.3596025101367
ENSMUSG00000015474	14.8911192458054	16.35498805734	5.97449781126102	5.54366961610492
ENSMUSG00000015478	68.9125595896943	71.5753616886828	65.5970998834972	60.1767583270375
ENSMUSG00000015488	10.9670644077891	10.9105903755611	10.0130277021638	10.184601034996
ENSMUSG00000015501	2.73147234092237	3.93902056523313	3.07761499105199	3.5221217266324
ENSMUSG00000015522	52.1896172037589	44.9395989028445	51.4389303884603	54.0615778766515
ENSMUSG00000015536	12.7106995530756	12.0897339822809	10.3604827838571	10.6965288133791
ENSMUSG00000015542	29.672509583962	30.556596991631	28.5656286153112	25.789401705311
ENSMUSG00000015568	41.1915969611536	46.7343151826003	91.5269419302512	54.6263419923849
ENSMUSG00000015575	165.795573643533	189.297266227331	143.695626481064	131.603915756425
ENSMUSG00000015597	2.71240670615639	4.34470798464884	3.2111016124652	4.49895116422675
ENSMUSG00000015605	47.4498386360375	45.7066690106427	49.6054436341212	53.6023330139042
ENSMUSG00000015656	1193.75719234051	1007.28476545033	488.198013370739	662.264877137108
ENSMUSG00000015659	1.58592948451022	1.48053191276358	2.27794505079584	2.33514118443849
ENSMUSG00000015668	13.7561499046395	14.824987010683	14.3972156859959	14.5357704954537
ENSMUSG00000015671	108.919893125951	126.115934128307	103.200378390191	100.554163118691
ENSMUSG00000015672	12.151647019834	14.7198644602212	10.3882426349037	10.8667436694664
ENSMUSG00000015697	27.2652046414874	25.1043418113989	27.4673062382	26.4199297904398
ENSMUSG00000015711	35.4580619959316	36.9280343980406	30.4819796440901	31.9397178316506
ENSMUSG00000015714	108.692600301476	102.269922317176	105.360770237961	102.846296173703
ENSMUSG00000015733	206.997481433999	206.52468825199	218.261397296745	209.965140031305
ENSMUSG00000015745	12.468802008238	15.4852894088152	19.5937339089992	17.5004027564538
ENSMUSG00000015747	9.09364138057529	10.0672539051001	9.41467211087063	11.4218316170727
ENSMUSG00000015748	18.1736918824151	20.2031041875823	20.590473007514	19.747539711058
ENSMUSG00000015749	81.2147644590648	95.7723219917222	129.676021558533	125.021097662732
ENSMUSG00000015750	52.2768186715336	55.2015449091042	64.2901728066637	58.32963461461
ENSMUSG00000015755	138.768091046102	133.159129069574	146.124044765868	138.403022975541
ENSMUSG00000015757	38.1131614330552	36.9355714545129	43.3444030387499	41.7497096320464
ENSMUSG00000015759	12.7333512618513	15.7575187422549	14.6496098294387	16.3961876020514
ENSMUSG00000015766	2.27253372152461	3.77879664547817	3.05603104265131	4.49449318828124
ENSMUSG00000015776	37.2213370941929	30.3649283375818	47.3035666515608	44.455162453159
ENSMUSG00000015790	25.6194058254903	27.5278632976145	23.7917462752968	22.9926525110149
ENSMUSG00000015804	35.0578723350374	41.8956487938112	35.3512519669389	32.9478680416301
ENSMUSG00000015806	9.29972848250182	11.4167153675441	7.07590691289115	6.81191031307015
ENSMUSG00000015837	281.576268512631	259.219854545747	250.388850619076	220.024927257019
ENSMUSG00000015839	171.08208909611	163.795504302366	85.4640489350244	88.8307065577961
ENSMUSG00000015846	32.3484345156604	25.5180782953822	34.8161840655251	40.5409419297297
ENSMUSG00000015850	5.63545907251238	6.18844960683775	3.49386010648226	3.3789278258778
ENSMUSG00000015854	56.121774654892	49.6624066062505	29.3109390499431	23.5931471179708
ENSMUSG00000015869	17.3955501988954	16.1519110727609	15.2750756805762	16.993841284595
ENSMUSG00000015880	28.7153074380459	30.1655114544839	35.7572383808857	40.7059981723261
ENSMUSG00000015882	5.11927046727439	3.75411946302228	9.0088927075254	10.1655251884655
ENSMUSG00000015889	708.091453902547	724.267831348902	551.520423516538	572.89555889176
ENSMUSG00000015932	624.847703565368	594.146686923994	610.745487694412	623.222336723528
ENSMUSG00000015937	165.851871125299	177.788004871048	9.09155089332953	8.9061125053412
ENSMUSG00000015942	6.63588586605368	7.43194275700739	8.30391662552638	6.18370886691243
ENSMUSG00000015943	3.95155606940767	4.2719455552535	4.57624240511563	4.54593040705718
ENSMUSG00000015944	2.7385520208241	2.00832900783452	3.5754736630842	4.49597381223902
ENSMUSG00000015947	15.3575099666034	16.0461367794209	7.70810962297108	9.89699706451319
ENSMUSG00000015950	2681.95999833609	2558.21441328905	2338.72042921083	2192.57736357569
ENSMUSG00000015961	84.0482881115816	74.5829687269262	101.018542476631	92.8503535552136
ENSMUSG00000015970	25.8910210964422	22.3726253593927	36.0461129683726	39.0284216181193
ENSMUSG00000015971	19.4462043863398	20.2753253902462	20.8374916488484	19.98236080716
ENSMUSG00000015980	7.46269695608461	6.70006610094613	2.19250522391757	2.64580863464223
ENSMUSG00000015994	25.51759532181	26.6269304185725	32.4674395389133	33.2958088950094
ENSMUSG00000016018	53.2682372410412	50.5940220655628	45.2009099791682	46.7886673465707
ENSMUSG00000016024	155.180362841497	143.332531835415	113.749862651545	130.615668841978
ENSMUSG00000016028	5.55756538720472	5.5380157352146	6.13989309376058	5.0051276231198
ENSMUSG00000016087	99.657399729891	102.957213701163	100.366861311403	104.996228242719
ENSMUSG00000016181	2.66061079659917	2.73993404889463	2.68771549628703	4.32551366828975
ENSMUSG00000016194	169.016740287824	172.837460755891	88.6658136623464	93.9540058336811
ENSMUSG00000016206	5.34894581562209	5.72041432403893	3.80942714114166	3.30771964242384
ENSMUSG00000016239	4.24406175843856	4.10907644071572	6.06251714764455	6.01846413720578
ENSMUSG00000016252	114.47090079872	148.44500846143	109.998102893542	104.867274717666
ENSMUSG00000016253	42.8919964144769	45.9747794293807	47.8341034586079	42.9492532477949
ENSMUSG00000016255	1.80467129337159	2.00762969223487	2.16417063746551	1.59916496503375
ENSMUSG00000016256	168.271401992296	190.281613192767	143.334483480513	156.898847442006
ENSMUSG00000016257	32.57387883421	33.0638694308356	30.5090932699317	31.514583413523
ENSMUSG00000016308	26.9373214786978	29.1304562264108	24.6935355612608	24.7364153207206
ENSMUSG00000016319	142.626158646289	158.356496304352	153.148930824988	175.920958245192
ENSMUSG00000016344	18.8530535734523	20.5276921771143	22.5328691574718	18.3983066165057
ENSMUSG00000016356	1.25023346242055	0.807229788092405	2.29674843607779	2.96179580134371
ENSMUSG00000016382	0.430590553359971	0.416986721631649	6.43230221675158	5.57310642918964
ENSMUSG00000016409	21.533569528888	30.0958798351695	18.1508163167627	18.5392848270495
ENSMUSG00000016427	66.3308514063668	77.059590447298	58.7560238052118	58.1937329881661
ENSMUSG00000016477	12.345360036456	14.6576459102594	16.8316759586848	16.0907042791708
ENSMUSG00000016481	91.5997652534951	92.2373852463656	73.7710873679283	71.1272254186564
ENSMUSG00000016487	3.2812714835574	3.33655157775162	1.48777753235483	2.06333415023336
ENSMUSG00000016494	4.83398430975769	4.26519724209673	4.38094044385292	4.16489514725823
ENSMUSG00000016495	6.59558207870959	7.63056681022103	6.87516659956288	6.9502306548686
ENSMUSG00000016496	4.56473167807172	4.61817557050681	2.02784201681147	1.574478002112
ENSMUSG00000016503	17.820768600159	18.2823756339821	11.1857693422099	10.7111375738947
ENSMUSG00000016510	16.2422824708765	16.0302252474475	15.8154877228689	16.3663273853504
ENSMUSG00000016520	7.58437328428465	7.14958281482102	7.33805065220886	8.05091397256184
ENSMUSG00000016526	1.53969975250921	0.90905194718142	1.83595505008908	1.5822193825391
ENSMUSG00000016528	311.916960702228	305.720569945031	319.076597012448	324.935010635166
ENSMUSG00000016534	301.93986310019	293.986875978715	278.275663550451	306.999899588736
ENSMUSG00000016541	480.361535184997	449.366652182116	401.00743364095	424.785362645803
ENSMUSG00000016552	27.6516112910199	24.6755393265824	24.4322757044656	22.2680999459207
ENSMUSG00000016554	99.5519540197927	100.826698701268	96.3960613240354	95.3662895367894
ENSMUSG00000016559	675.817432559675	714.970182357715	606.404315766551	520.022915840375
ENSMUSG00000016619	58.4066377309903	58.370911572335	64.3964355559963	69.2468059776155
ENSMUSG00000016637	5.93766628473612	9.16485628146763	8.05434311636831	7.06025525387616
ENSMUSG00000016664	115.65482481405	105.25500652761	116.642702211888	117.127305239076
ENSMUSG00000016756	44.7016939061862	47.1605947200554	73.9053478502601	94.9845469343984
ENSMUSG00000016757	6.75258133216325	9.06566237977909	8.17001171807395	11.1677745922479
ENSMUSG00000016831	64.696165628445	60.4900189585465	53.0601785115303	57.5100409890025
ENSMUSG00000016833	5.36850581164421	7.24915471679712	3.65458353587857	4.48960054210319
ENSMUSG00000016921	46.8247825855466	51.0419200713184	54.9657224263985	62.2202756085736
ENSMUSG00000016933	4.21073749989888	3.78072619249273	4.69081873452556	4.26460982937878
ENSMUSG00000016940	23.2593244013378	24.5846672482556	17.8941241977374	14.6723497695736
ENSMUSG00000016946	10.7486125365806	9.76479307899008	10.1896099310643	11.2789134216172
ENSMUSG00000016984	3.75626815000562	3.8446092199159	4.89895653115312	5.55160742159694
ENSMUSG00000017002	498.21883520605	504.561320972805	319.256600146863	302.523546423702
ENSMUSG00000017009	8.57766383462649	6.7352556509713	11.8476349137107	9.51329134817238
ENSMUSG00000017057	21.3915540114936	27.8503339761932	7.8233886027495	14.4177273095774
ENSMUSG00000017119	59.4166547237911	54.8089102567026	53.8495089642669	55.4597210814334
ENSMUSG00000017132	62.6761736040843	54.7063532519595	91.5221661213007	76.4908580464324
ENSMUSG00000017144	2.17413807569283	2.29725869779239	6.19573897709201	6.29991054788778
ENSMUSG00000017146	12.5822883496151	12.4032520494844	17.5910316288024	20.3237974302691
ENSMUSG00000017176	2.64177688061013	2.40095591783984	4.79045820605641	4.41608997057553
ENSMUSG00000017188	36.5080993478689	42.9500754076058	30.9869114430914	31.151163983231
ENSMUSG00000017210	34.6915648910013	34.4822768142064	35.5019817258438	35.5898622918817
ENSMUSG00000017221	42.6985019018994	44.9626608410709	51.7152666475224	53.3133890324569
ENSMUSG00000017264	46.2331922054187	43.8232878781611	48.2245182096889	46.8453360071709
ENSMUSG00000017286	29.2418200339272	36.7520438860109	31.6607119996415	29.6495313885995
ENSMUSG00000017288	52.4336131639684	57.1350108035363	38.011876367783	36.1184586887575
ENSMUSG00000017291	22.3554920615515	22.43746724131	24.7420793422857	24.7415768489092
ENSMUSG00000017299	32.5337662062758	37.7534756941262	30.2574352833249	32.2573212450351
ENSMUSG00000017307	17.5488593249802	18.2111060830287	17.57231858454	16.8051917576408
ENSMUSG00000017309	3.26162691736336	2.12537998509797	4.4826956160168	3.23853875456555
ENSMUSG00000017376	11.6929089890225	13.9423796532059	14.1786170092458	13.0870046460148
ENSMUSG00000017386	3.40649755875554	2.24637148241459	2.74395495373708	2.92212471915877
ENSMUSG00000017404	96.7748600605862	116.887059082228	102.647549465625	125.13457126524
ENSMUSG00000017405	1.75620173687298	1.46754120704374	1.48307155535745	2.03847421444813
ENSMUSG00000017417	1.80663737053916	2.07072711254129	4.33703542937649	4.10550322978684
ENSMUSG00000017418	7.07767077517185	6.46760393036044	5.90994999796174	7.56183789934553
ENSMUSG00000017421	58.761762504993	50.9227586602627	75.7055788558677	78.9419954104717
ENSMUSG00000017428	37.2990598038165	44.9032324260914	40.6589352278534	44.6363893036905
ENSMUSG00000017466	379.248154400578	348.60950647815	247.345205794491	231.700116784427
ENSMUSG00000017478	82.4091233486503	73.9742304633171	91.1868655955327	76.4325959341071
ENSMUSG00000017485	81.0975708745542	71.6070054929975	94.4370206818478	90.9711298184121
ENSMUSG00000017493	74.1528582802047	87.5024313018731	143.852489532273	132.388492152981
ENSMUSG00000017499	11.7894184084364	12.1130313436242	19.8104415675557	24.0642749373158
ENSMUSG00000017548	46.3449802026765	45.8378375835268	55.9717325373278	56.5158957640329
ENSMUSG00000017550	6.71491488662422	8.38713402475321	9.37364653062111	12.5721548369932
ENSMUSG00000017561	121.802421131406	105.18498294104	135.48976919913	126.026318314507
ENSMUSG00000017615	6.28520123497093	6.38708880040283	6.42450074668518	7.94882864037947
ENSMUSG00000017631	194.894491515614	168.087924569385	118.364766657483	126.198393005718
ENSMUSG00000017639	80.8837095146957	68.3192767251943	45.8199125213564	39.8187276312196
ENSMUSG00000017652	1.65977641535947	1.86033284656463	2.74130701307743	1.99965232560725
ENSMUSG00000017664	102.004920710183	108.871039984175	99.6237309172575	97.5818904182137
ENSMUSG00000017670	29.3603098962443	27.0518288092723	35.6737900149195	35.9377677327091
ENSMUSG00000017677	33.8128631837361	32.0890022139047	46.5415568403711	36.8262601278195
ENSMUSG00000017679	21.404989653031	20.6693007485198	26.4878449422862	27.3206077713393
ENSMUSG00000017686	10.3234325635467	9.96565619798433	9.83608351311052	12.0090162531518
ENSMUSG00000017697	36.6890169699821	41.1058571502578	16.1395076186755	15.4259831293531
ENSMUSG00000017707	561.027753500402	527.483967256192	554.679761861984	544.848211523816
ENSMUSG00000017715	69.3298072275258	60.8930432497683	56.8135050031726	55.878455763041
ENSMUSG00000017716	38.4091893108302	49.8034694544689	53.3172995851016	58.3034889621285
ENSMUSG00000017721	80.2314643682123	86.847901578018	76.2497822982298	78.6789293363849
ENSMUSG00000017737	8767.5669854078	7484.87605587773	4253.77570264597	3840.34349953265
ENSMUSG00000017747	27.791745789176	25.3312876845013	19.3251053646042	17.3647799917263
ENSMUSG00000017754	14.3228134895529	17.3717265662955	18.310314464874	15.1014252885848
ENSMUSG00000017756	5.76848396986051	5.06624152411658	4.02705015428818	4.39315625834539
ENSMUSG00000017760	88.2932080056013	90.7143736893039	103.941306580006	103.276299323789
ENSMUSG00000017764	4.20808999552892	3.95196097201177	4.28301927907857	5.09989705437178
ENSMUSG00000017765	1.86697062688821	1.78737398666284	3.16418045841592	3.65600996089433
ENSMUSG00000017774	64.7496643773661	57.682658232249	70.9405027253952	67.2017642338451
ENSMUSG00000017776	37.0479949714676	37.8084099866715	38.0472933795074	40.3948637854806
ENSMUSG00000017778	86.6391557441486	102.979988155795	63.1970580272055	70.2866192991457
ENSMUSG00000017781	320.983361009354	348.445974505945	253.474428182901	254.533068301224
ENSMUSG00000017801	51.228866266303	51.2621470423329	43.3407210896647	45.3696167871885
ENSMUSG00000017802	67.2058489830788	62.9866612567513	66.5667863041636	63.4801263387382
ENSMUSG00000017830	39.3546036533784	36.7322181500399	28.7388636674911	27.2955760612484
ENSMUSG00000017831	43.2267206188225	39.0485977571852	41.0929689760996	38.0997976482401
ENSMUSG00000017837	58.8214403585588	61.5957441284069	50.4928675568757	50.7303144613191
ENSMUSG00000017843	152.28401047636	149.030743098365	154.768443956793	165.229267340615
ENSMUSG00000017858	18.8090552729494	19.3109338634118	20.3389263838628	18.8065271177385
ENSMUSG00000017861	20.1847246640712	20.9782865196543	35.2571881653206	33.5694907220726
ENSMUSG00000017929	32.0205862615155	32.6828185704431	30.4119785978371	36.7519829931072
ENSMUSG00000017978	0.474788390341816	0.160296783300359	4.71584689023299	2.90589544880366
ENSMUSG00000017999	20.7877281951599	22.2608896063546	21.1219696731932	21.1352800432231
ENSMUSG00000018001	5.75811555746004	6.29573025029291	7.46014958359719	6.19177303873123
ENSMUSG00000018008	147.832499314056	145.182036028961	208.68932098139	183.306885962883
ENSMUSG00000018040	35.9968147721363	39.6217427722013	35.6454698045847	38.0653869297849
ENSMUSG00000018042	27.6552432542616	30.732151299095	28.8681294226163	25.6566000008227
ENSMUSG00000018068	3.23075162780787	4.78803437121196	3.17686849173589	4.29581024691894
ENSMUSG00000018076	65.176964932295	61.9386568935079	77.5956452775781	80.4334737186003
ENSMUSG00000018102	35.9479307240438	37.3459294780046	8.93156920597072	6.45751271063376
ENSMUSG00000018143	36.0664148277144	34.5594866628145	32.4524162766108	27.5554341732351
ENSMUSG00000018160	26.0748537935044	24.9634888657545	24.0301619040722	29.1875105148799
ENSMUSG00000018166	1.1047576880061	1.316503449851	4.07871938322158	3.40423761909338
ENSMUSG00000018167	45.8724261794273	42.9875955150565	42.8922859167815	41.9552960054163
ENSMUSG00000018168	9.23769444890314	7.8884177838858	13.1336384939547	9.77050289794009
ENSMUSG00000018169	3.45415952468583	4.26047296319098	5.5396606443895	5.02625325579491
ENSMUSG00000018171	16.0160192455311	18.9071684560264	16.8046375945033	18.8555490394866
ENSMUSG00000018189	47.3886809121719	50.924105474863	46.6173520787679	46.9109212250148
ENSMUSG00000018196	11.9835967171054	13.2865777087636	11.8936680861363	11.2349549675766
ENSMUSG00000018199	7.7765242237259	6.41770038956079	5.31241389379689	5.25595656135746
ENSMUSG00000018209	439.968330669285	377.451534698959	405.783860517752	401.553773974685
ENSMUSG00000018239	3.4718823153592	4.67278351087911	3.00599259059247	3.05426905347894
ENSMUSG00000018286	72.5240210812293	84.1382672051119	70.5844656206475	70.0656445347112
ENSMUSG00000018287	55.288612390382	57.8031106731622	45.2771785728624	39.9036709051939
ENSMUSG00000018293	2495.75240930441	2693.52753300922	2106.28835765918	2042.16156537312
ENSMUSG00000018322	22.9396799663116	21.2742797279192	15.2148277171984	16.1804597319909
ENSMUSG00000018326	438.64399307446	422.310544405832	347.528596267645	363.690169435195
ENSMUSG00000018334	47.7887116094954	37.9715451445556	41.8805641135656	42.1843736792391
ENSMUSG00000018339	6.81311106781686	9.40999575942853	10.1800244632262	14.2686237042673
ENSMUSG00000018340	78.5673302581826	66.7152421710871	61.0491958092968	63.9036648213894
ENSMUSG00000018347	39.9789526023905	37.0981872112002	27.705693162351	29.4922839094512
ENSMUSG00000018362	118.201693558324	132.809252310297	103.101390506706	124.121081133117
ENSMUSG00000018363	27.838110036867	25.7423315712729	35.7510567752054	33.0235922788195
ENSMUSG00000018372	8.38711702767297	6.20626281116894	6.19148084436949	6.58390291953656
ENSMUSG00000018377	61.7482759890921	54.8708615239409	75.3700318087662	69.6964414454997
ENSMUSG00000018378	4.16467224852963	5.04253064878124	9.7680809579431	7.78598541136751
ENSMUSG00000018379	98.9922452341772	102.483447364583	114.42954327869	121.310986976361
ENSMUSG00000018381	19.1225892601643	21.9262639394007	11.9269095003076	10.8813337627027
ENSMUSG00000018395	5.26998010990561	5.29523203737893	4.72176121849992	4.8288261539208
ENSMUSG00000018398	7.7782394953915	8.84122844768878	7.60072316505433	7.86181380971378
ENSMUSG00000018401	31.7620667392396	27.1914207761527	31.9579438489175	38.3710582080326
ENSMUSG00000018405	2.4315121516553	3.19315564932807	2.13394284665897	2.34546922863163
ENSMUSG00000018412	40.8394320835143	38.0413945097232	44.4745179989723	44.9471336074244
ENSMUSG00000018415	7.98317047390623	8.5163787605169	11.1879604998749	10.6474308949007
ENSMUSG00000018417	3.84889917507533	3.61672019792362	2.80490655850999	2.06501831608007
ENSMUSG00000018425	47.0375939768195	46.7760918031765	34.1212475140153	33.8206240704567
ENSMUSG00000018428	1.68324833805798	1.39437334145223	2.3149839552502	2.25877112780016
ENSMUSG00000018433	8.69178285643314	6.63752177854797	9.98900913183368	11.141511319276
ENSMUSG00000018442	26.9744176757465	29.7490533176323	25.1330269071467	28.5840748571911
ENSMUSG00000018446	12.7396229473756	16.3102012170015	13.123453282804	17.2257177583613
ENSMUSG00000018449	4.91002549637782	6.2804601603896	4.38900800204471	4.14562899404228
ENSMUSG00000018474	15.7205327998803	12.4515176607027	15.8413208150904	11.7180953257718
ENSMUSG00000018476	360.746709371324	306.769930011017	280.376456759821	265.490133265498
ENSMUSG00000018481	40.9964800832219	36.6162920651435	45.2943903604438	46.5199035653606
ENSMUSG00000018500	1.01970435849055	0.856122082195175	1.55110402288098	2.53816324236332
ENSMUSG00000018501	486.037992487762	455.907548620214	406.225447495621	419.193949911259
ENSMUSG00000018507	103.519102776666	91.2556724631803	61.5874250758331	61.8629848281406
ENSMUSG00000018509	1.7890146041181	2.65121931818675	1.6248623822041	1.52331564977144
ENSMUSG00000018541	41.6782899046662	43.7969652279283	35.369142328158	39.2280353423389
ENSMUSG00000018547	91.9037874888631	79.5773497834922	105.974181858466	103.72515921
ENSMUSG00000018548	12.6422697763786	13.3792153094549	20.0980955868834	20.8974357555869
ENSMUSG00000018559	73.9549455767703	70.628718938273	70.7461014120351	75.4419565554485
ENSMUSG00000018565	15.4805904379368	13.7993468515518	17.4358115327767	15.8422512959826
ENSMUSG00000018567	894.583984405417	899.78197199418	655.658387569021	598.281208748211
ENSMUSG00000018572	99.9779300854939	99.1323874806371	89.9388207348459	82.1231329074733
ENSMUSG00000018574	52.9197899341498	51.9879570510391	51.4835273621618	54.8735948438164
ENSMUSG00000018583	67.0694513863959	70.2911754961811	85.2073700358563	91.5020694261759
ENSMUSG00000018585	45.4106977965234	50.5851133230234	37.6040261049577	38.2853130481307
ENSMUSG00000018593	1.8644050355291	3.14262957624284	3.54141534373875	2.35137424279691
ENSMUSG00000018599	14.3930799591799	14.5510876711276	12.4164132830546	13.2858484239596
ENSMUSG00000018651	1.48664474091549	1.6128063127978	1.6750567926821	1.57497652113765
ENSMUSG00000018654	415.63562285816	367.368610524854	457.400272909137	490.842388920292
ENSMUSG00000018659	9.21144877708713	11.9600278956875	11.926068488908	12.5791177935463
ENSMUSG00000018661	48.3267765262582	46.9931728451772	35.953544021834	37.5060321640583
ENSMUSG00000018666	29.2972797535982	33.0201645133474	34.5386486043397	30.6347575737366
ENSMUSG00000018669	25.8500652264377	32.4814931274404	26.6252255939586	29.0026189162968
ENSMUSG00000018677	43.1840302354574	44.5136876076027	52.447248312594	52.4808293479422
ENSMUSG00000018678	35.9769492938428	31.6527316349682	29.5053528943194	32.1493464698138
ENSMUSG00000018697	12.6386472995116	13.4598840241298	10.8531545149089	11.998016914549
ENSMUSG00000018698	13.0824800076778	8.66837550448419	14.2894938430236	11.2237368937162
ENSMUSG00000018707	283.03229673439	255.070065373734	267.983223847387	303.893754396236
ENSMUSG00000018733	3.87435314087519	3.31641320109057	4.00913098879364	3.90474671571318
ENSMUSG00000018736	153.997281219512	133.869689836812	119.646264140557	116.086850975904
ENSMUSG00000018750	7.01805899209832	6.07545405057141	8.81431873705769	6.78516622102881
ENSMUSG00000018761	29.9724657681243	33.6881946898817	26.0042079737104	23.2837066303619
ENSMUSG00000018765	46.9095943464748	45.5888398810985	43.5376326552696	41.7550876766846
ENSMUSG00000018770	75.3134769691864	86.8964029579953	88.4442715902037	94.2657900955212
ENSMUSG00000018774	91.6291489139469	87.5889215295069	47.4288530229855	45.4838845440498
ENSMUSG00000018796	259.047406674626	223.861041384936	261.036311423209	285.149721032656
ENSMUSG00000018809	2.75979924086496	2.69429430445855	3.40547156343995	3.01157085293293
ENSMUSG00000018819	2283.22143471995	2067.95798121853	1599.61466329061	1332.48483267885
ENSMUSG00000018820	69.5641727826117	63.8828354959331	69.1733748955849	65.7294020936255
ENSMUSG00000018841	17.1245180220906	18.4015081158022	21.1092649762228	18.9213090446437
ENSMUSG00000018846	25.7616210062906	22.2287614754863	33.0682933848155	31.5333584549405
ENSMUSG00000018848	44.9530298064099	46.7730937562591	41.2615047305636	45.2322770210975
ENSMUSG00000018858	20.0589878696475	21.9207898730605	10.4600538956089	12.3517824745447
ENSMUSG00000018861	9.17745750413301	9.58777235725662	7.85419335287605	7.84430349073238
ENSMUSG00000018882	22.2644593294399	23.0827219040039	37.5851915994317	38.7599684514001
ENSMUSG00000018899	93.682297327662	106.395594780369	71.780172337729	66.4925449692509
ENSMUSG00000018900	1.99674488982615	2.4643835191566	2.89227656755763	2.54860618603375
ENSMUSG00000018909	208.180655079968	184.817485209423	175.41809897603	167.425375801125
ENSMUSG00000018920	1.81943884090686	2.18032496858088	0.801752349487679	0.784699747487878
ENSMUSG00000018921	37.9581138317326	36.8259958166834	40.1706802467606	41.0946771241392
ENSMUSG00000018923	26.313754345685	29.1029332424068	23.8082423145219	24.2907866691005
ENSMUSG00000018924	20.66819229117	18.9799136133822	33.4851726381766	24.0679947947278
ENSMUSG00000018927	717.228582233527	719.38997983244	447.215982343437	305.428360242241
ENSMUSG00000018930	2.34575850746206	2.83327526581491	1.03075479357195	0.641689415988527
ENSMUSG00000018931	12.2528881676639	11.4321170249742	16.2437583403367	14.6665706254673
ENSMUSG00000018932	131.961559507249	125.852103883506	114.160783160544	119.974720522226
ENSMUSG00000018965	235.279001802727	224.203005380841	290.541621897591	275.204486463805
ENSMUSG00000018974	58.0037967381869	54.6511223977859	55.3898441518995	60.607912355771
ENSMUSG00000018983	346.531599121603	307.713948076306	293.004519046982	296.077618379331
ENSMUSG00000018986	6.64539268428793	5.60860862950837	6.67638972506516	8.44302922660162
ENSMUSG00000018999	17.9010459312514	16.8878699937671	22.5424148179258	22.2320219200234
ENSMUSG00000019039	7.51437220918415	6.43565278302544	9.72873036178633	8.84077537962068
ENSMUSG00000019054	331.720376327711	377.053941445657	253.057395473081	241.170123303463
ENSMUSG00000019055	49.2058868250527	39.8195825417095	39.5244999839369	42.403173612072
ENSMUSG00000019066	650.41501197953	575.485408586027	608.796690173127	559.042094940373
ENSMUSG00000019082	3.72091019338523	3.32690707362591	4.25710340468918	4.16801099312362
ENSMUSG00000019087	236.652574568754	230.72857410188	176.381481577726	165.168590969444
ENSMUSG00000019088	8.99075478051714	9.31684674000569	8.68696998030215	8.83568332475743
ENSMUSG00000019122	27.4864338706772	37.0553819555033	27.3781956791045	28.6681698632641
ENSMUSG00000019132	86.8008025819787	93.274521698763	126.246145233219	131.559548708402
ENSMUSG00000019139	50.4054420603017	47.8005428857428	29.7506977615508	30.918772072184
ENSMUSG00000019143	9.5883774370381	8.46883928168137	9.70497463117606	8.89002417186392
ENSMUSG00000019158	20.8023543428453	27.2132603966633	20.846387224481	23.0236831500962
ENSMUSG00000019173	291.520913977374	281.872100771781	282.200253112808	263.960085317191
ENSMUSG00000019179	322.040174471578	332.820767551025	301.177003271465	284.947082245128
ENSMUSG00000019188	196.173163176719	196.454682231802	150.129670479121	159.36602722997
ENSMUSG00000019189	57.218034131985	50.4737489520684	44.8653343143256	44.6629974497626
ENSMUSG00000019210	270.505352971653	276.778296574494	153.908938323251	144.728270317724
ENSMUSG00000019214	10.9649155919672	12.1098697724662	17.3778789599482	19.463817603737
ENSMUSG00000019254	106.374583054147	105.094550788289	99.3023318577478	89.6585539679728
ENSMUSG00000019256	0.847996577312283	0.561875013357495	1.67055456062752	1.90513418154068
ENSMUSG00000019261	25.6449638948733	25.657609302283	28.2961724218347	30.9030916578138
ENSMUSG00000019295	6.75208164930097	6.6410757092743	7.15380278574346	8.84818392788164
ENSMUSG00000019297	25.4083431742925	28.6455117746131	29.4162737771543	31.2894116792279
ENSMUSG00000019302	120.532089514937	103.991981946779	91.6635828223657	90.0610451747347
ENSMUSG00000019303	4.04777990350672	4.2095408539866	5.49025588286562	4.8985675632208
ENSMUSG00000019338	34.9024486857408	32.2333057755098	45.1900853968861	43.6525600851067
ENSMUSG00000019362	131.290439549067	154.223652342377	94.6419862826294	91.0512746313736
ENSMUSG00000019370	351.825252861717	355.684100611631	357.09043349744	352.17084159113
ENSMUSG00000019373	25.8659205403069	30.1285940509342	30.1272552845881	29.7899603072159
ENSMUSG00000019428	240.36365484272	257.462704490002	226.373985639177	216.706387762274
ENSMUSG00000019432	72.0545222645246	73.1788877351482	89.6839649119005	87.4081806589587
ENSMUSG00000019433	31.2039053373052	32.5424999772034	50.8365811431129	51.2396649641083
ENSMUSG00000019461	23.8838914444574	26.654916021324	40.0819755335322	38.4218570805534
ENSMUSG00000019464	2.08814627411482	1.65416644528365	1.49481986421497	1.50570052365357
ENSMUSG00000019470	66.5830700891708	63.5552370364323	55.2932574498405	56.1492945150706
ENSMUSG00000019471	181.907628022046	181.74003453558	191.446891451027	181.531003293548
ENSMUSG00000019487	2.16915715865881	2.55886829558668	2.54826529552547	3.59517175164297
ENSMUSG00000019494	76.8651298957308	85.6818034819463	79.1601976364269	75.6395714121895
ENSMUSG00000019505	977.2324097231	993.835967766157	975.016810799565	864.404631766808
ENSMUSG00000019518	7.78728040626729	8.00710311824396	8.21692972960953	8.17476688155375
ENSMUSG00000019528	154.427171407191	146.335988687941	131.613173786449	153.585280783361
ENSMUSG00000019539	3.43944411395666	2.7666061348082	4.73702896368826	3.95706504222721
ENSMUSG00000019564	296.015189793732	273.93057863846	271.856125175921	260.472241913234
ENSMUSG00000019578	67.4501902754614	68.5614058976794	55.9568247693519	50.2231015646899
ENSMUSG00000019579	13.4144413321004	16.2111326586105	13.9612037224844	16.8265558113242
ENSMUSG00000019659	101.104997147632	113.532773754861	78.1551190667202	70.6212397792842
ENSMUSG00000019689	5.0210792531805	6.5691181051669	5.6700418006822	5.0683647927456
ENSMUSG00000019699	5.89200335923818	5.24557581564013	8.46344094850774	6.9548592168189
ENSMUSG00000019710	51.8064037746497	53.5280063095228	42.7812374847725	38.8090978896484
ENSMUSG00000019715	28.2572316609379	26.9287860346598	27.6062790681802	30.6305870650761
ENSMUSG00000019726	322.121617462891	278.147896964483	282.603562498492	294.685233303088
ENSMUSG00000019731	197.269930729042	176.075188006943	199.884775995185	206.395443728063
ENSMUSG00000019738	11.5007820889983	12.7080219590446	10.6840464147474	11.0676235343267
ENSMUSG00000019763	5.35914404881638	6.07265616886859	3.53888326856576	4.34032554971655
ENSMUSG00000019768	1.78672395396949	1.93708691707714	2.30500665865154	2.06305146203132
ENSMUSG00000019773	20.8014136114959	26.0692269430658	28.8730934678414	34.5858782399228
ENSMUSG00000019774	2.73956725183477	3.56681538320307	3.03053047488053	3.19163391730982
ENSMUSG00000019777	22.1867250909689	28.3748396396748	29.9278501982567	30.9160555482619
ENSMUSG00000019782	27.6101119368566	34.939387445484	24.6330626007174	23.3376978948176
ENSMUSG00000019790	87.561321623493	84.7621675509066	101.673109261175	111.991494746668
ENSMUSG00000019791	6.83432412855638	7.94224388820704	6.53170897806385	5.63211334049472
ENSMUSG00000019794	37.7908623886564	41.7325863011432	31.9449665543897	33.4607394943184
ENSMUSG00000019795	97.6749292393842	94.015453553513	87.1963954889635	84.0305257881065
ENSMUSG00000019797	5.90373245963843	6.32580114471193	6.46624211058182	5.7246067392879
ENSMUSG00000019802	33.4896032850823	34.5972863228853	36.0541231950139	35.8441537059109
ENSMUSG00000019804	133.561235397778	131.024970577479	117.819649410002	116.595172812472
ENSMUSG00000019808	3.52642520862088	2.67848795517784	4.14251973414653	3.34436904613729
ENSMUSG00000019809	6.93291131961409	7.7290551367389	7.65702203308483	7.01909408054978
ENSMUSG00000019810	85.5516215526369	93.8881892685521	72.5537276721223	78.4596378429353
ENSMUSG00000019813	3.68991886226066	4.49890633350766	4.9668384466566	4.80175203180276
ENSMUSG00000019814	11.163875882117	12.1025835609043	13.807587903023	15.5295011039828
ENSMUSG00000019818	246.865795843713	231.941164807594	229.460469016849	224.831709440858
ENSMUSG00000019820	26.5636348736645	25.2273793868896	18.8230150828907	22.2012964792189
ENSMUSG00000019822	14.9175093719462	13.2170817301705	8.8237081144562	8.69981133503802
ENSMUSG00000019823	247.05797171033	221.141412528978	214.73420150321	190.381558345761
ENSMUSG00000019826	27.7808112319915	25.8051311606737	26.2158899993725	24.0348617312336
ENSMUSG00000019828	3.43617928640376	3.1901980357836	3.51556864372159	2.39757767555983
ENSMUSG00000019832	131.227968564066	125.751295399281	136.408016713741	141.076368864815
ENSMUSG00000019837	20.8805957059502	23.7252705198502	17.7580861011923	17.4351167758417
ENSMUSG00000019838	13.9476791739835	13.5252451511035	12.7361930215515	13.4223904550252
ENSMUSG00000019841	8.56943316761876	7.5077444559582	12.75354626977	11.8802625323237
ENSMUSG00000019842	1.37481126361183	1.76610118639354	2.63149307551179	2.09942150816904
ENSMUSG00000019843	8.91698756062128	8.86899389321019	13.3281908964129	10.306502725549
ENSMUSG00000019845	2.83792544917973	3.15943098041858	5.31082632439985	4.62256827059975
ENSMUSG00000019849	25.2905372703267	22.8517558976055	28.7498107538304	30.4870418189013
ENSMUSG00000019850	14.344278662927	11.6440066893835	17.7373009630905	14.9207515043009
ENSMUSG00000019851	2.69486455577115	2.89731357178842	0.193805376903644	0.233517760332157
ENSMUSG00000019854	46.800603637825	43.5197422126296	43.1312326369	40.2393082151213
ENSMUSG00000019857	10.4204480676146	11.5984169704298	13.2384385272223	14.1716196815829
ENSMUSG00000019861	10.0980614116191	11.0448005533899	10.8915461248065	12.4841184475669
ENSMUSG00000019863	1.36649589687809	1.52495310883565	1.71424097874773	2.26200112972868
ENSMUSG00000019864	4.82089592700073	5.03926155680904	3.39232565969672	4.19123500896703
ENSMUSG00000019866	33.1097344966152	23.2530571576176	35.4508968715273	29.426821216248
ENSMUSG00000019868	39.7111997951749	40.53455616674	35.3501126631422	33.872959768304
ENSMUSG00000019872	165.777354495419	170.657984998181	130.373583375123	150.643933383896
ENSMUSG00000019873	85.7385151596545	92.9793470613339	85.0960275910584	78.9919812889528
ENSMUSG00000019876	1.24458251288076	0.954752766239541	1.15010542073839	1.963993892493
ENSMUSG00000019877	54.1701981683338	50.923899178904	47.7533655138132	55.6051273245822
ENSMUSG00000019878	1.2554669077486	1.25086101199208	2.35635929528448	2.50878321070353
ENSMUSG00000019883	2.07950906072055	2.38538266353915	4.282652888312	4.40705550712251
ENSMUSG00000019897	14.106118161599	22.0178595802408	14.6971619831861	14.2419233185256
ENSMUSG00000019907	269.961630666938	301.890761686744	230.353360379896	223.330866629462
ENSMUSG00000019916	9.93812954744284	13.0525885962721	9.64226982993363	11.4386384942523
ENSMUSG00000019917	4.27375708278655	4.01579191784862	5.07197273368737	5.43157241408618
ENSMUSG00000019920	391.801585600823	316.301893744844	407.306953602896	425.152320201518
ENSMUSG00000019923	21.651816503189	23.2763081012372	29.6384263569746	31.6854799958452
ENSMUSG00000019927	12.8517148515224	14.2365895253665	12.7770833308348	13.6875802446878
ENSMUSG00000019942	35.1658072249488	40.3476031456876	48.9250994855317	51.5659581060382
ENSMUSG00000019943	58.3479157007492	71.9328713958483	58.7123162364942	55.959815272264
ENSMUSG00000019947	16.0842763829433	15.2588784402028	17.2477949422819	15.9639695747386
ENSMUSG00000019948	7.38133288965904	7.96993044122388	6.13371889790096	5.90298914734494
ENSMUSG00000019951	95.6684652327171	87.249115706543	96.1194268911861	94.3264936265568
ENSMUSG00000019952	17.3609752524637	16.8213797661579	17.6276853397738	18.4756084379167
ENSMUSG00000019960	162.648865104695	141.022742395236	98.4144058118057	87.2204373782882
ENSMUSG00000019961	146.877067141569	145.423092757955	175.148181091923	193.166551848909
ENSMUSG00000019969	215.46983482347	180.776378701896	209.011350991696	206.976914074451
ENSMUSG00000019970	27.4660632174845	26.3883193134751	38.2339565174102	35.313006590411
ENSMUSG00000019971	1.7402307361022	3.26128980773272	2.45338160865611	3.1853848270773
ENSMUSG00000019975	4.82103641980108	6.2391129851762	4.54043127767909	4.40034947145807
ENSMUSG00000019977	20.1475726951579	18.62495616025	20.8275424036779	20.4294449465239
ENSMUSG00000019978	18.003398175944	17.4524439415153	24.1402001505303	24.5457994784402
ENSMUSG00000019979	82.9611225518249	73.7413846768334	78.5773964547298	85.3073359561624
ENSMUSG00000019982	29.0566149431148	29.2953371163162	44.4457729206327	42.027498055235
ENSMUSG00000019984	13.3203255897844	14.3950251689731	12.9448141661172	16.048139278981
ENSMUSG00000019986	6.26626978074609	6.41594724464128	4.43107047851354	5.71871910267071
ENSMUSG00000019988	8.74960765269785	8.64887754165782	11.2962759122014	11.6056324283792
ENSMUSG00000019990	7.94669404640987	9.54067948990712	1.92252189215776	3.75930011221896
ENSMUSG00000019992	5.85441446126847	6.44088960834209	6.67455248932521	8.38564420990322
ENSMUSG00000019996	2.08108688842389	2.1637965461724	2.76892713073089	2.44500824645053
ENSMUSG00000019998	77.6800530327866	72.8353345494051	78.5222090113714	79.0818110423195
ENSMUSG00000020003	11.3419023352185	11.1119257228776	9.6846691414603	8.3229885150444
ENSMUSG00000020009	81.6922549631885	85.1390448311138	72.0835651046908	74.8839125762012
ENSMUSG00000020010	37.8684390013106	27.8899656468371	9.06064691130906	6.62241294948569
ENSMUSG00000020015	19.627026375142	18.4203580880203	17.3218549493445	17.6819911516648
ENSMUSG00000020017	6.28082262916763	7.04791716306454	12.1215572038667	10.1461606649851
ENSMUSG00000020018	15.5566163954275	16.8406641507838	23.0874909295455	24.874045742665
ENSMUSG00000020021	3.13005438316707	3.69911077193729	4.24892459563609	4.80706671921925
ENSMUSG00000020022	17.1709064207031	17.5976928734423	28.1734751382053	27.5717118219606
ENSMUSG00000020023	5.33625545141478	5.82856068766732	4.09938863633013	3.05789093989879
ENSMUSG00000020024	22.2684660224918	21.4618962274736	23.2195492137162	24.128352159456
ENSMUSG00000020029	437.767010425386	400.382221881179	422.497018839489	406.270520107215
ENSMUSG00000020032	2.99586627998195	2.80990253898815	3.89077728217276	3.16311236169347
ENSMUSG00000020034	198.494365255337	169.52878396446	189.118791255826	181.077855967555
ENSMUSG00000020038	26.7745971923225	25.9632313178363	26.0718031521714	27.5797530229622
ENSMUSG00000020048	219.471504891266	277.257126865735	178.578076662067	206.770374884257
ENSMUSG00000020053	8.88556241685545	10.3836984935482	7.09370917236361	4.84598236309222
ENSMUSG00000020056	13.4527231839665	14.7082716610667	12.8670733198823	13.6855093941597
ENSMUSG00000020057	58.9095999430569	55.3618291751343	66.4494990113402	63.7137179481645
ENSMUSG00000020063	13.0139244666213	13.7673583044077	14.0377504737313	15.8150511762312
ENSMUSG00000020064	72.9121637324856	66.882885441136	66.2413813867612	62.6197028600985
ENSMUSG00000020069	14.1681518720118	13.5134557177532	13.1838064015304	11.3266339607212
ENSMUSG00000020074	85.6122214576719	115.086387202376	61.4350240435513	57.8747637879147
ENSMUSG00000020075	30.679226271069	32.504628156722	34.1907270413828	38.1023312967796
ENSMUSG00000020076	25.1368501041062	26.6202736263287	31.4353209970617	31.9133428965636
ENSMUSG00000020077	483.812029643808	532.911131474738	242.031459511355	237.410162999317
ENSMUSG00000020078	63.5361944423653	60.6944945803193	75.4655353945234	73.0182240989969
ENSMUSG00000020079	6.42518246502311	6.425959584633	6.80551494255866	8.35539389694676
ENSMUSG00000020085	16.5163774566271	15.8194174553635	15.731387917763	14.3526189098852
ENSMUSG00000020087	15.2761259381212	17.1792982690555	17.5514879224681	19.9785687144351
ENSMUSG00000020088	59.8091935854765	62.5175844601654	60.8656836262912	65.7204166571472
ENSMUSG00000020089	9.55349376493923	9.70334742186736	9.53564481102534	11.6533286343849
ENSMUSG00000020091	377.203996429887	320.89044381568	307.302766067644	308.453801139549
ENSMUSG00000020097	137.047193277928	120.32000111981	104.658985620745	104.705377716243
ENSMUSG00000020100	38.0844090553976	35.4630253913562	36.2477858951601	35.9134348850221
ENSMUSG00000020101	1561.26892343148	1389.35404146253	1243.83546317748	1235.59245781909
ENSMUSG00000020102	6.08000146993594	5.24552105764081	7.48800981568792	6.94232725921043
ENSMUSG00000020107	12.9926699380301	15.1304217441915	11.4814739259052	10.9064375441576
ENSMUSG00000020108	7.34358028186471	7.43828875231695	3.99329549449326	4.39096942035903
ENSMUSG00000020109	25.0809657187846	24.6115712890943	25.8552760675899	25.5391806749509
ENSMUSG00000020111	172.912871245789	169.694525218821	162.672374261471	151.302631567387
ENSMUSG00000020114	45.5157318702553	41.7234766025692	47.5863168667666	51.1645460267324
ENSMUSG00000020115	27.0529881072492	30.013455680694	26.247729919694	25.2630607336599
ENSMUSG00000020116	3.90780754122848	5.72639784215736	5.45240181119556	6.83433045698154
ENSMUSG00000020120	488.391265206343	437.710041904817	356.993870271463	330.700173074175
ENSMUSG00000020124	81.0727492590751	70.1539991000644	75.9784204726864	79.0151755028041
ENSMUSG00000020125	257.339221876856	364.960558465758	488.201918603791	536.826661591188
ENSMUSG00000020128	39.945449356274	33.2621086899917	35.5272195919961	35.8074197180126
ENSMUSG00000020130	61.0292270298401	58.6541263472117	60.7982082925163	57.420125762274
ENSMUSG00000020132	114.899394132056	108.763049650746	114.371062931092	114.206788337055
ENSMUSG00000020133	52.5359944877265	50.9274265476554	41.5369624553315	40.1060577575066
ENSMUSG00000020134	47.2661703625435	55.2705613778946	45.2904400288274	43.4945302097117
ENSMUSG00000020137	5.55606335629902	7.47759299463906	5.84690885346252	6.30969895366642
ENSMUSG00000020143	478.966539910695	398.651576373644	449.951373711375	428.648469998168
ENSMUSG00000020149	108.325990640691	106.727800781983	105.008461997797	109.761110155482
ENSMUSG00000020150	2.5042768562364	2.19478757960459	2.61685909496222	2.80669407672466
ENSMUSG00000020152	530.293797100843	543.464938578968	597.429274510603	593.311716851521
ENSMUSG00000020153	34.1220246745726	38.3436777964305	29.4644691511739	28.092900765978
ENSMUSG00000020156	10.8628836911765	9.51234344422519	14.0795440913612	12.9577235465547
ENSMUSG00000020163	33.7791387302851	37.4682914211732	32.7528574034347	32.1868175128989
ENSMUSG00000020166	52.1114997667811	48.4476845263894	50.0430606547001	51.1865358890136
ENSMUSG00000020167	51.1073149028596	47.5697276810369	65.8431440857556	56.1165526238745
ENSMUSG00000020170	14.9399333298378	12.8499947272875	15.7436954498287	18.5229992815172
ENSMUSG00000020171	41.8990800031939	45.3693443981367	49.4979426924837	46.5040465191379
ENSMUSG00000020176	0.685640582257105	1.02782616976844	2.77079007619917	3.07418625737651
ENSMUSG00000020180	47.2399094005219	53.6968177668924	38.7420927892522	37.4207338610982
ENSMUSG00000020183	3.66623945982076	2.40959767689589	6.48914497786755	5.09604744888428
ENSMUSG00000020184	59.6053738112805	54.601431895216	62.2261783495727	60.228389811007
ENSMUSG00000020185	6.94386576834617	8.96299845906836	13.1240446231177	14.4801198713044
ENSMUSG00000020186	6.52738428627995	7.88040203689015	10.4134359091922	10.0332794536419
ENSMUSG00000020189	54.5906747312452	50.371231156742	58.8133847614104	65.7227996564594
ENSMUSG00000020190	254.282146942745	218.431221269673	236.874893223995	236.587300027171
ENSMUSG00000020196	51.9638938051677	42.24720092059	54.9443764301844	48.3924804912776
ENSMUSG00000020198	136.678557223478	120.786349641203	111.857966498956	122.762768903321
ENSMUSG00000020205	52.9053456479959	59.0393698501839	33.7146358273348	31.7190334801185
ENSMUSG00000020211	92.8331125552687	87.0583126330628	78.8210832024329	76.9922266542913
ENSMUSG00000020212	8.04284608717093	7.2219624036249	13.5501798766974	14.0401386377086
ENSMUSG00000020219	32.4869693864224	39.4977769896999	35.7015980680011	33.6358817437218
ENSMUSG00000020220	58.2742937699178	51.1549877902001	51.7809668229091	55.1870235057004
ENSMUSG00000020224	12.3748681306414	12.8120033354987	12.8346597729158	11.0990359240812
ENSMUSG00000020225	44.353132645643	47.9871644923486	32.2593035269912	32.5125258696674
ENSMUSG00000020227	103.847740389926	85.3266027292206	86.6908831762941	84.0784338070767
ENSMUSG00000020228	20.0687034456359	19.9302474682567	22.2736106123368	23.8980018364214
ENSMUSG00000020231	3.91635037190786	3.45513256248011	5.94138926958626	5.19898776159665
ENSMUSG00000020232	21.5223902368295	23.3261080418709	23.9474448989885	22.3139162242377
ENSMUSG00000020235	66.6324030946544	68.7027467446022	64.9083121858936	66.5992814602249
ENSMUSG00000020238	80.8303781743334	77.6612653515385	84.0905592673751	96.2928914438337
ENSMUSG00000020246	16.3334344121683	16.5846291627823	19.8064970280678	19.4755956052357
ENSMUSG00000020248	37.786947353143	37.8320018876071	38.4737397499648	40.5731176885984
ENSMUSG00000020250	46.0440667320827	42.7790482167265	50.1268701898	54.7901164352279
ENSMUSG00000020253	305.066588397419	305.813804651832	303.75630843919	284.62282866907
ENSMUSG00000020255	8.46486061335878	9.23029466392931	14.5227835786861	14.4360848419413
ENSMUSG00000020257	49.5135902237979	43.5546219443702	50.246316365522	50.7834265630275
ENSMUSG00000020258	2.58075810730702	2.3068577556642	2.55067725761911	2.43354375253645
ENSMUSG00000020260	12.8940394066446	14.7405734767265	11.3754232547171	13.1077890061737
ENSMUSG00000020261	14.8958227901987	12.1038974871111	17.1482490235118	18.1997706184837
ENSMUSG00000020263	3.12954360529999	3.14214160645822	3.61369837961979	3.9373799914163
ENSMUSG00000020265	28.6788031727322	32.7213171597612	43.8273385714768	45.265470245203
ENSMUSG00000020267	33.6252573316713	49.2586122816288	43.6402035935938	46.3479154696664
ENSMUSG00000020271	60.990795829332	53.8805992747736	53.8062753082726	54.8426217230321
ENSMUSG00000020272	381.585669076619	311.5740832114	350.001614966584	330.652854629917
ENSMUSG00000020273	15.8187639498719	13.6023908707977	14.3163028749985	14.9566613749299
ENSMUSG00000020275	16.2703304150233	18.6056739796608	14.686789688355	15.5261826999964
ENSMUSG00000020277	43.2158190034462	47.6865032161125	39.304708583056	42.1143819138797
ENSMUSG00000020280	8.58873262684022	8.4272543157633	8.16408793926708	9.14394861801942
ENSMUSG00000020283	9.45551681712521	10.5604421039906	7.2727643569932	8.66880985019731
ENSMUSG00000020284	6.6603617970826	8.08171232799251	5.59948454512636	5.34980203728702
ENSMUSG00000020287	2.17200562236098	2.36726892191299	3.00520948710177	2.80635832182773
ENSMUSG00000020288	9.61863310483765	9.26581800814043	8.9401276457703	11.2564280066232
ENSMUSG00000020289	2.39448841427122	2.43461744680919	2.19608090534906	2.34427743076379
ENSMUSG00000020290	46.0896589787154	46.6142399233406	54.2161993347891	59.3307387455501
ENSMUSG00000020300	24.5747359605018	24.5086150843652	15.7375665365409	15.1197492194478
ENSMUSG00000020305	10.0699847537948	9.50980596354873	6.37457428769355	6.57687685434581
ENSMUSG00000020307	88.8065831198617	98.7691429251023	78.6860141946106	78.0151379652871
ENSMUSG00000020308	26.1579669418146	28.1720359688105	19.3353979836469	21.0218967134763
ENSMUSG00000020309	6.6271896335358	6.95455777456358	3.16111870371146	3.08248192557476
ENSMUSG00000020311	12.5242632371174	15.1367938602465	8.83128071790741	10.5353327373717
ENSMUSG00000020315	189.221255913738	167.819476037881	294.405077993959	304.692636996293
ENSMUSG00000020321	67.3134007324793	65.764293059959	65.078565083968	67.5968377767721
ENSMUSG00000020323	22.8171894327993	32.7412080349573	30.6601748381787	30.7049410870658
ENSMUSG00000020325	12.5289015037875	12.8050312611704	9.94260622090699	10.2561647534782
ENSMUSG00000020326	67.5319607982773	68.5142415677488	62.2731916497651	65.986576404058
ENSMUSG00000020328	8.95945350720177	9.29208113656987	9.01705966280848	10.2765626560612
ENSMUSG00000020329	5.00456304123727	5.28781841061123	7.04475777948554	7.31145189558642
ENSMUSG00000020330	37.1559873316723	48.7200818156677	35.399237295035	41.3728428224939
ENSMUSG00000020334	4.02638902408467	4.6440997217433	4.41792097249285	4.40243643170731
ENSMUSG00000020340	1023.58447520523	883.924624212608	725.66955504064	756.904396292089
ENSMUSG00000020346	133.54855796719	130.985535344091	135.942426329689	131.539626006457
ENSMUSG00000020349	164.765135801104	163.076697672298	174.107330687519	177.214535053183
ENSMUSG00000020358	236.705311811186	264.698176001466	302.501526093583	298.19885820809
ENSMUSG00000020359	2.89629522547	4.07209662646675	4.91668476003627	3.64443571207192
ENSMUSG00000020361	128.67583425809	123.625155076149	124.488307876041	130.424723914782
ENSMUSG00000020362	41.0749582991324	40.3655519194535	46.8187672735493	53.3061386830281
ENSMUSG00000020366	18.1677284912103	18.4339544142032	19.4596142082354	19.6159299511518
ENSMUSG00000020368	129.241418953714	145.352616935399	116.649645882954	135.93818935156
ENSMUSG00000020372	353.964142674985	399.745944637277	427.378462496878	487.127849692521
ENSMUSG00000020375	41.6986159809471	37.7615769691492	44.5542690470295	42.4334744196452
ENSMUSG00000020376	257.075420368831	257.73550626113	235.645988348446	233.595850755006
ENSMUSG00000020380	19.4640137466224	20.1769138718941	25.3502473421136	26.0779628422834
ENSMUSG00000020381	2.65657205855723	2.40390918815994	2.98242957476769	3.15342066932219
ENSMUSG00000020385	14.5146992470092	17.7752929364561	12.3411050213497	12.0427374576328
ENSMUSG00000020386	20.196848997678	20.6363637438587	20.2304137579536	21.2505494370407
ENSMUSG00000020387	25.0496847930513	22.4545679164138	22.5037141099188	15.9708071901549
ENSMUSG00000020389	2.04099971674145	1.42815941576243	1.88596861522613	1.4875610657676
ENSMUSG00000020390	115.847915339391	123.237346692435	90.9274838868433	85.6674855958463
ENSMUSG00000020392	74.4910058430991	70.9511394933636	72.0376884567654	68.723493694198
ENSMUSG00000020393	3.86889182452027	4.27613462031368	7.27326786519932	5.46449609075761
ENSMUSG00000020395	8.39182302130749	7.4577493496814	6.12104839411058	5.33336039401581
ENSMUSG00000020397	11.8792631835244	9.97412385051644	10.186565094347	9.24109904435797
ENSMUSG00000020400	99.1017594462712	81.4631042322532	84.1022322383836	80.3022884335079
ENSMUSG00000020401	4.20129486187974	3.37098624763328	15.2837762204807	11.4412564303914
ENSMUSG00000020402	82.6580740928991	89.4971121387184	101.460517060281	113.872045857746
ENSMUSG00000020407	38.0409973129641	37.1360982258564	10.9725117750377	21.4714270411643
ENSMUSG00000020409	106.402797409879	101.777541027119	85.9216425746704	83.0018626284073
ENSMUSG00000020412	20.7117391008211	22.1605762518088	21.2089160396089	23.0110976629411
ENSMUSG00000020413	6.55994049544687	6.56480565696922	6.57220956270173	7.46235730744797
ENSMUSG00000020415	12.5671398760924	14.4737555135429	20.5878264384552	21.3874187497724
ENSMUSG00000020422	46.5950849555256	44.7689297505024	43.0547805967906	38.1407972475458
ENSMUSG00000020423	201.057384112894	196.12095540508	181.618355477195	152.046267148184
ENSMUSG00000020424	3.30237065067078	1.98234133900028	3.40630410390184	2.31476071635029
ENSMUSG00000020430	33.6174194403881	39.5349994999118	40.6560562925124	39.728083782167
ENSMUSG00000020432	393.943561509297	337.258542020794	271.368023096074	278.703101243657
ENSMUSG00000020437	186.568142723042	167.9426765813	150.085289879582	166.167776081608
ENSMUSG00000020439	27.2426862928477	27.6502616021427	39.6917050111618	38.0782381110763
ENSMUSG00000020440	104.043021322442	135.748077456949	95.9971809967409	88.2670600196206
ENSMUSG00000020441	21.3198350048557	23.7253265059149	19.1343570167088	20.5093363598992
ENSMUSG00000020444	15.4991142218506	15.8481949328166	13.4180818249445	12.6075755868807
ENSMUSG00000020448	27.3115383268348	26.3821400946074	32.2743517565042	33.6690401846802
ENSMUSG00000020451	59.6202099016188	56.4706422570952	50.4689541599634	50.4224023542072
ENSMUSG00000020453	23.5797303891778	24.1743685892296	29.719743088896	28.443780171527
ENSMUSG00000020454	44.0877965501397	44.9940958530212	50.7771952724898	47.2253297755678
ENSMUSG00000020455	58.8097790439158	58.8570670589269	46.5956683668777	48.674228696795
ENSMUSG00000020456	211.29488824918	196.506356196625	181.247026959513	194.303228566488
ENSMUSG00000020457	50.6454793182109	54.9653534904602	56.2511276066839	53.613181981292
ENSMUSG00000020458	121.379040764433	114.213916540398	102.162614820913	104.54381727926
ENSMUSG00000020459	9.1454739132301	11.2419856838389	7.7266483332714	6.59477129791513
ENSMUSG00000020460	383.952443834975	427.990737062766	184.143933171955	221.687191911301
ENSMUSG00000020462	8.69635303810705	11.8168678082329	8.38666209448703	8.88869201757548
ENSMUSG00000020463	84.1601982412114	77.3438468868505	79.1607108316111	80.9362379030346
ENSMUSG00000020464	4.85632262738081	5.78682537579593	5.51795209820997	5.27984010617701
ENSMUSG00000020471	10.7155804651624	10.6940489802024	8.25842894909942	10.56326838201
ENSMUSG00000020472	9.98952071058553	9.98212133378574	13.0364937461889	11.4545011892281
ENSMUSG00000020474	12.1552186167784	10.7834248762388	8.83397151440863	6.69712938442135
ENSMUSG00000020476	415.123934708356	380.654392595988	357.476612721744	323.887027211809
ENSMUSG00000020477	16.7033254449645	18.4597003539295	20.0093848934857	20.0026996630992
ENSMUSG00000020482	16.7301210243808	19.3085301051124	23.7320454379688	23.6667767982544
ENSMUSG00000020483	34.1380085411389	34.057218861807	59.1169877966856	51.3297505063439
ENSMUSG00000020484	152.101393575034	162.22607915793	146.226373543324	162.687956716673
ENSMUSG00000020485	103.281241149707	96.5497009262309	77.7395951257652	72.5526619920585
ENSMUSG00000020490	2.84248038123147	3.9161192188022	2.12516515274803	1.85630551187011
ENSMUSG00000020491	2.1396063555674	2.37364460707719	4.87722551799696	5.26795863998606
ENSMUSG00000020492	5.45155453570417	6.69136788610856	7.68815518546497	8.27237516241598
ENSMUSG00000020493	27.0958960113223	28.4923800752315	35.3702009081535	40.8463048542088
ENSMUSG00000020495	28.028126627049	24.1386398038325	26.2175437478132	23.9767407669037
ENSMUSG00000020496	65.5794677267014	65.7372801497414	53.7036262345365	50.3964487352273
ENSMUSG00000020513	4.83846070378433	4.4800026500855	5.56753851731421	5.61728609232187
ENSMUSG00000020514	8.37731646584325	10.2596288660992	6.02600626888131	7.13881355358893
ENSMUSG00000020515	50.0687985095803	48.0783315236075	45.1904678820921	43.0963991618539
ENSMUSG00000020516	19.0550893931726	20.7393941835004	19.8028315687635	21.4469696770921
ENSMUSG00000020519	14.5960279996238	16.4220737126505	19.5504802198936	18.566384920704
ENSMUSG00000020520	32.7966164436355	29.815149012809	114.545831746515	105.587907319435
ENSMUSG00000020521	6.66751372293736	5.86479354584617	7.33693525946354	7.42755802559901
ENSMUSG00000020522	31.564671306905	32.5831200482208	25.5486365976427	30.5940622344184
ENSMUSG00000020523	43.2079362876702	46.4437428815619	37.4255066796544	33.4164554190104
ENSMUSG00000020525	17.1740614416336	18.0570116029763	19.1568064357336	19.2117019793456
ENSMUSG00000020526	2.81948278477398	3.18301452606847	2.95384554855269	3.06357427822239
ENSMUSG00000020528	12.5111312596946	13.3026926908657	9.73147592074751	10.7722618595229
ENSMUSG00000020530	173.342183598565	217.204586586092	133.78158099047	133.962829869123
ENSMUSG00000020532	18.0570305816675	19.6351698226539	20.4064780334764	27.4867561838383
ENSMUSG00000020534	4.80822518013547	5.10555128432095	4.64040235588203	5.22901038716571
ENSMUSG00000020536	17.9691797080471	17.2795935398411	21.8376055979851	21.8289920321987
ENSMUSG00000020537	13.5571030271199	14.3760167430244	15.4932239834905	14.6450389746197
ENSMUSG00000020538	31.9064446010222	34.0241866422073	26.1912352525705	30.5163388944435
ENSMUSG00000020544	3.56195825639564	4.40595866621137	4.59623281607028	3.64214835953538
ENSMUSG00000020547	9.0409914737144	7.63149552603207	8.87925248232719	9.10916378300755
ENSMUSG00000020549	7.7361467226891	8.8609811694623	10.1970100025527	10.9400156754464
ENSMUSG00000020553	23.0248497363304	17.8267398989391	4.9317717779967	5.14211616446955
ENSMUSG00000020561	13.8761514399386	17.6024247519405	14.3884229327524	13.8113112323849
ENSMUSG00000020564	67.7885415978674	58.7654302463233	56.7715704639911	54.265393197546
ENSMUSG00000020570	72.2555993906713	70.5188125862372	85.196483276033	87.3781499272538
ENSMUSG00000020571	94.3605224742244	105.842920706283	76.3560265123792	95.2257660260307
ENSMUSG00000020572	81.3333115466163	80.1502726549512	69.4433872732224	70.7937064996882
ENSMUSG00000020573	253.190199831847	196.332534394489	223.15786575592	231.956800340635
ENSMUSG00000020576	10.1058060879731	11.2936254722584	10.7925360286331	11.2642697205321
ENSMUSG00000020577	60.5910328479112	57.576930570105	93.1158548126535	76.9938990218599
ENSMUSG00000020580	53.3762478775928	57.5679197428436	70.6224499866938	69.8554255069322
ENSMUSG00000020585	65.0330867936408	63.5368231577295	79.9150415385119	73.4114508129119
ENSMUSG00000020589	6.9276420197245	7.95097849570051	8.52178936852705	6.9044255420256
ENSMUSG00000020590	34.8179760871818	31.6229091945307	39.9986118021129	40.6115395646155
ENSMUSG00000020592	2.79145335931104	3.7160125296202	5.61335581343264	2.85445438092003
ENSMUSG00000020593	4.55209044090709	5.68044801780843	6.35935913248752	4.021840298421
ENSMUSG00000020594	145.845112070808	150.829851424572	151.888605529032	158.281641335617
ENSMUSG00000020599	2.17510843870865	4.11979485404828	3.59786131841251	1.34604142822058
ENSMUSG00000020601	1.3571302433822	0.989495246652352	14.2872597835359	10.5920095176421
ENSMUSG00000020604	35.3804494342954	30.4715036001947	23.2601186665463	18.507115666231
ENSMUSG00000020605	15.8259982039087	14.7369302805343	11.7308957640407	12.0867979496059
ENSMUSG00000020608	59.8423010287097	88.3484645110407	85.191540746671	85.7797254651463
ENSMUSG00000020610	16.1728692839434	17.9027376440266	15.8765363672014	17.2895361919335
ENSMUSG00000020611	75.7493848389309	70.5991939718074	83.6372766089276	91.8337503127424
ENSMUSG00000020612	427.15834783483	427.964413806587	354.900921570977	365.738537291156
ENSMUSG00000020621	5.99431064057457	5.52759022868604	5.53948307140495	5.01860425718319
ENSMUSG00000020623	3.56078926085184	3.17002761222157	5.6396378252255	4.12226934377055
ENSMUSG00000020628	22.26409675971	21.3598465983934	21.2377783562598	22.0408969032059
ENSMUSG00000020629	4.00348342714785	3.88815002794454	9.61071582596673	9.35417740662161
ENSMUSG00000020630	3.56584363654409	4.76643043944976	3.53164143647495	3.81219420504011
ENSMUSG00000020634	19.9514883249345	19.114359890408	19.6354096307329	21.2146223286109
ENSMUSG00000020635	1.33842280732428	1.59732963465222	2.92798822353167	2.80062145347693
ENSMUSG00000020638	170.587926690626	130.168180299842	97.3857908896968	83.3837684474375
ENSMUSG00000020640	149.146781800436	171.260669987859	137.16450384613	152.377879112232
ENSMUSG00000020641	115.280725352394	98.3352833586533	33.6169549308125	23.7503150570998
ENSMUSG00000020642	339.938600877114	294.612584234755	139.991167980623	148.250040286987
ENSMUSG00000020644	43.7327814852803	52.6368847073563	59.1241221707667	62.672518857229
ENSMUSG00000020647	49.6045606844197	42.3009362631381	51.2437095645548	47.9175366478119
ENSMUSG00000020649	53.3045489283184	65.9087043498431	90.7371346141626	106.603752234533
ENSMUSG00000020650	4.72348523688226	5.87080570963908	5.96418379245228	5.58593310445855
ENSMUSG00000020652	14.4217441951963	14.1813099148878	17.9533842105137	15.2125745468231
ENSMUSG00000020653	4.59661722441603	6.45945379905716	8.53427141000778	8.19101645436584
ENSMUSG00000020654	9.98915993900347	11.5714830900614	14.8324779579542	11.5493373482195
ENSMUSG00000020659	16.1203208259617	17.9335975454246	15.9306339374431	15.7437270266274
ENSMUSG00000020661	31.2113378056887	28.2254588812389	34.8150658409997	32.1798697590364
ENSMUSG00000020664	43.8517955462595	48.7088085752449	43.5870689184932	50.676740959778
ENSMUSG00000020668	1.92200397810185	2.00649243347132	1.76461194745336	1.92863813122873
ENSMUSG00000020669	3.13882101152678	2.56172684897548	2.52432383552504	2.37841061731624
ENSMUSG00000020671	79.478515880741	79.3446568899442	72.1352954936397	78.8187664154094
ENSMUSG00000020677	35.0143359018379	40.1981693835586	32.7599146185596	34.0815832919989
ENSMUSG00000020680	65.5586274689836	74.2148653796293	62.9711907589979	61.9712025110721
ENSMUSG00000020681	27.4828020396777	28.0079856677969	11.0848266875819	8.45799525002864
ENSMUSG00000020682	1.84667812171243	1.34391545469552	2.89901495823342	2.41267502898692
ENSMUSG00000020687	16.256725719059	15.1342921309774	16.8300182278909	18.4959068183022
ENSMUSG00000020689	124.954079069952	110.859844660904	109.081399571049	89.3944103039739
ENSMUSG00000020691	2.93018909768781	3.16918556550282	4.67797299198273	4.27717845359043
ENSMUSG00000020692	1.50313916205287	1.48437781204609	1.50250507600951	1.98411273279499
ENSMUSG00000020694	33.978962758049	34.882081581955	38.135457012778	36.4963640053008
ENSMUSG00000020696	54.7650106608094	48.9596453297325	72.5955671933754	68.1967511676838
ENSMUSG00000020697	49.1217765071403	47.3336304159345	44.7225334810164	53.6114228588842
ENSMUSG00000020700	202.495915852701	172.919266834097	228.269337759435	226.693060483953
ENSMUSG00000020705	62.619216868195	59.0226988180233	65.0375549940803	66.0630266245992
ENSMUSG00000020706	18.83086765259	20.6001221951937	20.8155702138747	24.21929015646
ENSMUSG00000020707	5.71063940866099	6.37701773647539	6.67491482252723	6.7537050362524
ENSMUSG00000020708	57.9428744393354	61.3127279583833	49.99660215976	52.0587334774919
ENSMUSG00000020709	6.07551123918295	7.38982790320746	2.86532412940546	2.83620253780767
ENSMUSG00000020715	17.5109611316238	15.1816939578187	16.377905384924	16.3238505712102
ENSMUSG00000020716	9.69176292119039	9.20749469337687	9.93358285602605	10.6258088533329
ENSMUSG00000020717	20.6671348174561	18.637558714961	19.4071691698067	16.849011695045
ENSMUSG00000020718	2.49526692015398	1.97103685831378	1.83897675310037	1.72442721680756
ENSMUSG00000020719	507.951200552481	471.630384390813	482.557357725522	452.620667549362
ENSMUSG00000020720	41.6764624585763	40.6248744905205	37.4245282966013	42.1852155408672
ENSMUSG00000020721	25.4862870981948	25.7646580887272	30.4420254671563	32.9975527967586
ENSMUSG00000020732	23.1119312513596	23.3923111965167	35.712792760409	29.1700160276204
ENSMUSG00000020733	456.783255032934	396.691142519672	443.974895947784	393.469827816219
ENSMUSG00000020736	20.9892306083394	23.6008041612731	23.4764200815109	24.9815732421772
ENSMUSG00000020737	176.339675812185	187.085290090815	178.968177035122	173.795334737906
ENSMUSG00000020738	59.8242458119214	60.5712725025284	73.7528878504078	74.0439108806181
ENSMUSG00000020739	10.8925679997869	13.1079336798432	12.6092038505628	13.607366513867
ENSMUSG00000020740	27.8272753811312	23.6800232113879	29.2428380392036	29.1059972082729
ENSMUSG00000020741	9.78760411557378	9.85992708538357	11.3161259900728	13.5930421664332
ENSMUSG00000020743	12.7765885423768	13.4235979854208	14.3896593535375	15.4348606700097
ENSMUSG00000020744	4.79015583183371	5.63955734542537	5.16793198704407	6.00897326519374
ENSMUSG00000020745	171.016654874291	163.083017768401	165.905521073416	168.843276846657
ENSMUSG00000020747	44.0332849797429	38.7802842189876	45.9429395018417	44.7945237349013
ENSMUSG00000020752	23.1031984137593	23.7404650630888	22.5029265307047	23.1803761763608
ENSMUSG00000020755	38.6954930330232	38.0927620241122	40.4124585979306	37.0143283930648
ENSMUSG00000020766	7.20491331842357	10.8369029660039	8.96710167274142	8.73552088851159
ENSMUSG00000020770	9.00227621311215	9.83793491827791	9.19547758849964	9.69764374159413
ENSMUSG00000020775	5.40050357106119	7.01785061244365	6.2320385874106	6.53704528785558
ENSMUSG00000020776	5.36151692500276	4.10295989420273	5.73649197130918	6.32060554509797
ENSMUSG00000020777	26.9331405774481	22.8883485026975	29.5361784321261	30.4988374842161
ENSMUSG00000020778	15.830918225733	21.7952986926258	17.0577296158102	14.5898096437484
ENSMUSG00000020780	60.6344370188586	56.0305248231386	60.9752377838435	68.0374784753034
ENSMUSG00000020781	3.218176804253	3.21349621034184	3.03908917415184	4.25678049593787
ENSMUSG00000020782	3.59320921164939	3.18301452606847	2.4057057486833	3.0824804404346
ENSMUSG00000020783	38.7735474220118	43.2877136166202	36.4223630939981	36.8346233859592
ENSMUSG00000020785	4.61127324597536	7.2033894912549	1.9784897727357	1.61844786095074
ENSMUSG00000020787	18.6519290319655	17.415661207804	20.4330436136974	18.7766664615719
ENSMUSG00000020788	788.732604914342	679.23864666978	929.161847012941	888.882652696465
ENSMUSG00000020790	120.546136680697	105.02277210988	102.203506342206	114.633686150197
ENSMUSG00000020792	49.0830707144966	47.7979772166297	42.2967354307358	41.2732590830321
ENSMUSG00000020794	23.6671900142812	22.6545896052544	29.4800053257085	26.6409274989765
ENSMUSG00000020798	12.8677539957586	12.3972294193857	15.5771191160078	12.2898705588865
ENSMUSG00000020801	21.0633457540856	21.1746359857499	16.5120562027949	14.7659188765713
ENSMUSG00000020802	13.2756753757439	14.651610605502	12.2393035703936	11.4439612794461
ENSMUSG00000020803	62.1085574753506	66.021068014699	55.0354154694382	56.7022551532118
ENSMUSG00000020806	65.1961069618787	68.8507951341736	56.5761768162269	55.357104441916
ENSMUSG00000020807	4.75500095048993	4.76995156539591	4.2220753614165	4.79866941918791
ENSMUSG00000020808	16.5647370374421	16.3361903213359	18.828100008228	17.3809211460102
ENSMUSG00000020817	11.9783701195507	11.696032657065	16.8337446439118	17.2406655593191
ENSMUSG00000020818	11.8769850943714	13.1808990943372	10.4994460638915	11.8547076618397
ENSMUSG00000020821	81.9104516398224	68.0425100968128	95.7680276675949	91.2339948636915
ENSMUSG00000020823	182.817691855243	166.563967647604	163.995338912867	159.962688063215
ENSMUSG00000020827	10.1031252216897	11.4514152301397	13.439384558496	14.4898118742802
ENSMUSG00000020832	9.61450323916277	9.83612785827306	9.76828299199638	10.1566421964613
ENSMUSG00000020834	3.68915295150238	3.4419286239877	4.13168245036155	5.12286451131845
ENSMUSG00000020840	39.1967728863513	42.2656222158645	45.7429457524283	45.6588826832033
ENSMUSG00000020841	195.155940378615	179.564835726542	189.864371793992	203.035707360445
ENSMUSG00000020843	11.4451939949834	13.2631929117453	13.0172243260166	12.1871927697575
ENSMUSG00000020844	87.4870862941764	85.0825378083939	94.1510344157366	91.7567774670996
ENSMUSG00000020846	628.161680927371	655.541912086643	600.519270389512	557.071687267905
ENSMUSG00000020847	3.15353567975593	2.2557807876096	3.59409904030509	3.06602007907481
ENSMUSG00000020849	170.830425086471	184.424505232339	219.99456262076	233.189528999115
ENSMUSG00000020850	239.236007380081	222.948341396933	237.960744540731	256.52996053334
ENSMUSG00000020859	34.1912742192563	30.8635947166037	36.2639595303394	35.1077692222863
ENSMUSG00000020863	77.8153560276877	106.79066724767	70.5031150184897	64.0738511439883
ENSMUSG00000020864	27.5666072003041	26.48315194746	34.6019519687289	33.58912542573
ENSMUSG00000020865	19.6388912384914	20.7862211101117	22.4020380781464	17.6571485076866
ENSMUSG00000020868	2.42945892504773	2.15397774937973	3.53423253540406	3.7827553025094
ENSMUSG00000020869	53.3327497838188	56.7620623622134	61.6495583567009	79.49555138444
ENSMUSG00000020873	16.2652024385565	18.5118817202959	12.142883863186	15.8360693729161
ENSMUSG00000020876	36.033369612886	33.5868950724761	45.1439938396183	40.8058214105631
ENSMUSG00000020877	2.5951613921126	2.64445892368109	2.64735109118506	2.69060017315916
ENSMUSG00000020883	18.6428060346505	18.9387218554595	16.6100659411277	16.2326367321085
ENSMUSG00000020886	1.80212809264511	1.82914321399119	4.70218918154059	5.0940810236892
ENSMUSG00000020888	14.6146501600402	13.2310984418338	12.4830356413029	12.1490246600052
ENSMUSG00000020893	19.3777755165164	20.1760696065339	10.1987343982454	10.7996008757617
ENSMUSG00000020894	22.8729865877868	24.0156611248283	20.3006605263998	18.1964982625097
ENSMUSG00000020897	34.6144359437126	35.1475453012675	54.0435284598013	54.2822057903413
ENSMUSG00000020898	24.5420242163219	24.7240767027159	24.4923056888567	26.6116860116487
ENSMUSG00000020899	7.70839699924417	8.23455807244352	7.19724165536496	8.12466119163386
ENSMUSG00000020900	3.73845511895205	4.11486317462088	3.54624090492277	3.0385559719263
ENSMUSG00000020901	107.975066051974	94.1750593787536	96.4655042303702	100.25649815966
ENSMUSG00000020903	27.8758696870079	29.9378656546742	23.7821115579856	21.0225311831708
ENSMUSG00000020910	17.9214372552156	17.127271280131	16.6852208067158	15.3810046579222
ENSMUSG00000020914	249.27004990901	271.090076013943	316.835224463509	336.915500737105
ENSMUSG00000020917	271.004928470903	249.313727440772	273.848399923319	273.628508062186
ENSMUSG00000020918	9.31445884054321	8.92763464784162	9.10871043338071	10.5075335154571
ENSMUSG00000020919	132.75801951491	118.915951756371	116.389860986008	116.061579381782
ENSMUSG00000020921	7.22531217403165	8.15612522115884	7.27305732984154	8.71749510381629
ENSMUSG00000020922	22.8232180381775	23.1191762498055	17.3101424943192	16.7593264187815
ENSMUSG00000020923	131.593612756553	128.305968160785	137.4770068474	126.754963650858
ENSMUSG00000020925	2.72053633233992	3.77029438757551	5.9195635262096	6.03832549563632
ENSMUSG00000020929	43.9277607280236	46.81840182956	51.8623591574223	53.79284368505
ENSMUSG00000020935	18.2226427852516	18.0384559349245	18.9476359500169	18.0388215985263
ENSMUSG00000020936	137.776012548928	150.659620841346	119.749194776938	122.331641232403
ENSMUSG00000020941	7.03804731698446	5.8239241395767	4.12809228043296	3.13326555004383
ENSMUSG00000020946	77.6562331807587	81.7807938538881	80.2703293406481	74.4568171499598
ENSMUSG00000020948	17.29264741421	15.2825710825511	14.577847312396	16.4054583397023
ENSMUSG00000020949	10.5462146641382	12.7936685424898	10.0084820263837	10.3907777860044
ENSMUSG00000020952	18.9529474129284	20.5051744305157	16.7602860629317	15.3705773191653
ENSMUSG00000020954	23.4154400692689	24.655485566059	24.3225409584107	24.3739945338399
ENSMUSG00000020955	15.5863287503437	16.0947613931962	11.790329889577	11.4716893919393
ENSMUSG00000020956	2.575761138897	3.56436258590545	4.17998849430916	3.44814593748051
ENSMUSG00000020961	29.3364992112744	28.849527249743	11.7679997135823	13.8488165944773
ENSMUSG00000020962	19.2935458267718	17.900865191314	16.5420666766778	14.5827207491498
ENSMUSG00000020963	5.6658770115972	4.92306712540793	9.03105563931674	8.52942990154349
ENSMUSG00000020964	85.2112202537448	80.6181474803619	85.2583278747372	97.2699296565937
ENSMUSG00000020974	2.11082528259223	2.7193557198718	3.64942111703864	3.85103901121282
ENSMUSG00000020978	16.655560341033	16.1866960920136	16.5676449060635	16.0762623443822
ENSMUSG00000020982	42.8682990753742	58.6373886210705	26.8234768161794	30.3705993531557
ENSMUSG00000020986	22.7472852876658	19.625553730152	19.5916442245132	22.6674659021545
ENSMUSG00000020993	34.0768137124734	35.6021680362869	37.1126206435508	35.5355814350017
ENSMUSG00000020994	34.1061036732821	38.0567002782172	37.5045777168743	39.7291999366278
ENSMUSG00000021000	120.652976726407	106.610087727819	101.249735578007	90.7279766031481
ENSMUSG00000021003	20.7521140552384	21.1096521178989	21.9845926042096	21.6403804077061
ENSMUSG00000021009	2.32726672410374	2.28282858649303	3.12446698484129	3.16681904067674
ENSMUSG00000021012	44.8598518891883	43.2501968623612	46.5983199475611	48.8843229998674
ENSMUSG00000021018	2.90428925546831	3.96071724995846	3.62943675053148	3.86819223900018
ENSMUSG00000021022	14.4615914407838	16.3295960479864	12.2187668013586	13.3564867849069
ENSMUSG00000021023	1.7675221491852	1.82960895301143	2.35484731049893	2.50475992523081
ENSMUSG00000021024	105.869993678417	109.187030357263	100.232674552856	100.073581130628
ENSMUSG00000021025	218.663445960844	230.068286996153	188.851819862138	192.168332137077
ENSMUSG00000021027	48.7765770576133	43.2776305786084	45.5149397834262	47.3691328165155
ENSMUSG00000021028	3.23284010850675	2.26949657621831	3.59393867964743	3.10169220884864
ENSMUSG00000021033	2.8420187683996	3.92744467855399	3.91090527526743	4.32173536662836
ENSMUSG00000021036	137.363627083881	129.121833553519	131.982616610353	130.700115659046
ENSMUSG00000021037	63.8281162476022	67.6495304913559	56.6432147918044	58.8546441885522
ENSMUSG00000021038	49.8269852356123	42.7644421991791	42.1579011622978	40.2462117416733
ENSMUSG00000021039	82.357461976671	88.0642633397446	78.9634071801409	79.142744506084
ENSMUSG00000021040	7.65029406928835	10.1763632634912	7.71792485684268	10.0875268769489
ENSMUSG00000021044	3.97985677360819	4.45167786514079	4.8823881577444	4.30056835047542
ENSMUSG00000021048	15.0373647689159	17.4264567745651	13.7725220675287	16.338519609429
ENSMUSG00000021051	40.5552783566058	37.3597643345071	41.1737875768043	39.3912942909475
ENSMUSG00000021054	31.9642901687151	37.5959083637959	44.2105951922927	47.5499327832491
ENSMUSG00000021061	17.390132754018	23.1451104842318	12.3911509154551	11.2984943692079
ENSMUSG00000021062	0.827436205276623	0.765558035483002	4.53555555325868	4.03797754882723
ENSMUSG00000021065	17.4062405183784	17.2975618785773	20.8630869854504	21.2402862373838
ENSMUSG00000021067	19.9387144424312	20.0487862577246	19.5265974155876	23.5257904859943
ENSMUSG00000021068	273.636639788462	254.750622616887	362.855536633279	360.077389257825
ENSMUSG00000021069	2485.40383713366	2284.05765170517	1696.84097839014	1649.08254156994
ENSMUSG00000021072	43.1524942352033	40.1067786049127	39.1919706799943	40.9325991457044
ENSMUSG00000021076	60.4775553515456	64.9349003890139	52.5292776669633	53.4209018240094
ENSMUSG00000021094	469.754645792049	459.310334889794	310.240034771839	287.967434583028
ENSMUSG00000021096	90.3097507453634	86.5861787204701	101.039300420024	97.7839760348251
ENSMUSG00000021102	17.5115471512068	23.3844295558337	20.8629277475303	21.0695964291104
ENSMUSG00000021103	6.36807395479444	8.9507046735072	7.44736700101237	7.28068269197418
ENSMUSG00000021108	3.76243891965689	5.53825990915963	1.81899145441949	1.91325165324339
ENSMUSG00000021109	49.3934927568329	53.5270252141969	36.0250197208715	49.9180672528008
ENSMUSG00000021111	101.522495495696	90.1011834251089	108.401842630427	115.229901380305
ENSMUSG00000021112	25.6998515658126	28.3756605635951	36.2243446999549	36.3662798914174
ENSMUSG00000021113	4.05950287196767	4.19118324687822	3.97670148935376	4.28931116352593
ENSMUSG00000021114	115.259839042765	121.632097910714	73.0901351977735	72.296400178246
ENSMUSG00000021115	78.9403288379585	78.1618326336476	76.7800114420172	70.1687031986646
ENSMUSG00000021116	31.7555825987149	32.4097477775011	43.1868614359051	46.7460379505163
ENSMUSG00000021120	1.85206320413576	1.74009086834779	2.29945307804326	1.74303569547773
ENSMUSG00000021123	106.489016151169	100.477417399134	76.0107105497308	78.9066299823147
ENSMUSG00000021124	72.047178105081	77.1140746893215	59.5882736485932	57.5907277130252
ENSMUSG00000021125	75.7928752651183	69.4661261828799	82.7017415063741	75.3330424733032
ENSMUSG00000021127	25.7650120570053	28.1378944228001	14.9645050924369	14.5533468681527
ENSMUSG00000021131	22.0648328464437	25.7552276225564	25.7627974529128	27.1799250241381
ENSMUSG00000021133	64.1935489767172	62.4743147399793	63.0593826086652	65.6282489526999
ENSMUSG00000021134	149.618069014988	154.502770415496	167.668830975563	147.637226415936
ENSMUSG00000021140	54.447599351727	48.8056847522764	63.732499523937	64.5378202818093
ENSMUSG00000021143	49.8086110112125	45.3812098889949	53.5676244177316	51.9501029135379
ENSMUSG00000021144	22.8250824588809	21.9836181240822	29.2000196448348	27.6036815981452
ENSMUSG00000021147	27.991673442618	27.3721112024847	29.1615874203417	31.268193962776
ENSMUSG00000021149	24.8835369385575	29.1228795444701	23.4533927967565	24.5634419298323
ENSMUSG00000021156	108.711155317361	91.9645114085192	108.291499906528	101.444464231125
ENSMUSG00000021171	94.4653191268989	85.2242107544072	65.3477076570279	67.0907131802517
ENSMUSG00000021175	28.4403384694885	27.0877616552995	48.4291812339055	47.971739397481
ENSMUSG00000021176	2.40314057815994	3.02830963939297	4.20818482743585	4.3127525678408
ENSMUSG00000021177	15.1465070427151	15.834081459063	16.4399618618242	17.1068054494752
ENSMUSG00000021178	117.108965346936	121.220375440685	107.160492864006	116.267548768773
ENSMUSG00000021179	26.3146728939845	23.8262913746699	19.1515271545832	20.7737128001668
ENSMUSG00000021180	17.6760327742441	16.4183457794484	22.2577184536002	19.8567570942004
ENSMUSG00000021182	189.468365203859	151.243409893788	192.153366007537	186.424703591042
ENSMUSG00000021185	23.2106540453584	18.8794399529148	9.60917319532651	10.1758927714839
ENSMUSG00000021188	41.5928599162223	46.5238836176354	47.0863446577498	51.2184495265708
ENSMUSG00000021189	19.0997768379741	15.8950576756322	16.3151047136709	16.4235992990753
ENSMUSG00000021190	31.8110981069936	39.0407093196205	24.6543537552789	22.6970149818763
ENSMUSG00000021192	27.6957887309897	28.5150931915009	23.4090247010798	25.3412265883097
ENSMUSG00000021193	7.41639520458755	9.28655534988574	9.4422070115244	10.8081140736163
ENSMUSG00000021196	66.7510992112448	65.3647913080943	50.255090812409	56.5532358466384
ENSMUSG00000021200	3.44547764916526	4.39353623317703	2.50533612419365	1.95042183115152
ENSMUSG00000021203	2.67313499108701	1.75009118540437	3.15895951166695	1.93869362824987
ENSMUSG00000021213	2.44121526523355	3.54088772110781	4.53271219200198	4.72687741612672
ENSMUSG00000021215	12.1684335543805	11.4004824863038	24.9479023233293	24.3497336999978
ENSMUSG00000021218	411.28541873818	410.398443954747	374.571228414209	388.571917026317
ENSMUSG00000021222	2.03573159629833	2.15351822242104	2.51109997580928	1.77038274493403
ENSMUSG00000021224	144.234035102301	123.259741070831	129.171607565603	141.681764930902
ENSMUSG00000021226	2.15081545052737	1.65400149802229	2.16521237995719	1.69765874632039
ENSMUSG00000021235	3.97201516004952	4.3918359954554	5.11746242738388	4.10010204888447
ENSMUSG00000021236	65.4824725639294	66.637412310227	86.1331850852093	77.7722918913078
ENSMUSG00000021238	4.09386067230272	5.01171607261952	4.34593136892439	3.69302778348447
ENSMUSG00000021240	3.12981271891036	3.6318953082133	4.28919394375399	3.70920266854153
ENSMUSG00000021241	8.60590168382596	11.2216624408279	10.8342491232022	10.2654524704262
ENSMUSG00000021242	167.051954201295	185.51789814785	170.867311593286	166.410342836798
ENSMUSG00000021243	22.0087664516098	27.1922042645921	21.3672562654661	19.0493272320977
ENSMUSG00000021244	28.3502328016871	27.8513248433445	28.8550725183225	28.2116410358078
ENSMUSG00000021245	2.62197520333606	2.86025464311476	3.45660803393604	4.40654482498682
ENSMUSG00000021248	257.998160517308	238.283663970443	223.92761449854	225.027599711107
ENSMUSG00000021250	253.539122055401	226.391034691216	171.792855222227	109.611497612858
ENSMUSG00000021252	7.79232602348649	10.1629227969808	11.3529509142746	10.6892972553385
ENSMUSG00000021254	53.4440696403752	52.3763460350071	50.5483841141683	49.3997465701392
ENSMUSG00000021258	48.0944196063322	44.492090299696	44.8154973337671	45.1361573591814
ENSMUSG00000021262	16.1611288095702	19.4322830128638	16.4320882794738	12.1751412166049
ENSMUSG00000021264	125.217223163747	115.148813137215	135.463584027075	128.827512916086
ENSMUSG00000021265	6.81617497268238	6.96524096996772	7.97181473492376	5.98625545556084
ENSMUSG00000021266	24.4107539518529	25.0801028774795	24.5722740283461	25.9692678586502
ENSMUSG00000021270	333.079147771721	472.322971741469	227.646503119441	303.594667507542
ENSMUSG00000021271	6.28534173484026	6.47305824706635	4.99323081559248	5.84536373417752
ENSMUSG00000021273	27.8115493984217	28.5603328973668	27.4321599271206	27.9301607514529
ENSMUSG00000021275	5.00900160928196	5.05843813691975	5.32144667951278	6.49610228465771
ENSMUSG00000021276	7.02043207363755	8.52143480035493	9.48142259237069	10.6183862668238
ENSMUSG00000021277	37.5993634100894	32.3768866689444	40.5134111228407	41.9359524123257
ENSMUSG00000021279	3.443133882759	4.90699350824124	4.5457186400559	5.43224675714112
ENSMUSG00000021281	299.204850687066	250.733748085563	213.20883720334	194.213392507284
ENSMUSG00000021282	176.036433491452	206.955186011069	180.713885197648	185.363063913377
ENSMUSG00000021285	5.54135236652737	3.74373768105148	4.84112695204217	4.73405458528576
ENSMUSG00000021286	1.6244144435323	2.26047527499727	2.49906750444835	2.48420263528525
ENSMUSG00000021287	1.16980876225777	1.52556174372612	1.83367215669469	1.96040206023648
ENSMUSG00000021288	34.9412465406698	34.4637488673391	41.2216237167112	37.5009315673523
ENSMUSG00000021290	31.7069596339387	39.6915188399998	31.9177268231227	34.2021933807657
ENSMUSG00000021298	5.65649563685828	5.7906903021386	4.83365632154895	4.50028900729328
ENSMUSG00000021302	10.5680242663143	12.4047981133987	11.9212138564194	13.2922216001161
ENSMUSG00000021306	1.8529194556305	2.25357606995551	1.90555377054277	1.63394362442835
ENSMUSG00000021311	15.0774416539242	14.3324825581305	16.7730302320713	18.3943562605231
ENSMUSG00000021322	79.8518383234606	66.9597915969367	26.4802362385604	25.567325833752
ENSMUSG00000021326	44.8579111189371	49.7962444526051	63.0976411239986	62.0228673137246
ENSMUSG00000021327	15.7776771554933	15.8247370623371	18.0662797314478	18.9651700130801
ENSMUSG00000021338	0.340577625781112	0.418716222042598	1.75311860941309	1.5403315489554
ENSMUSG00000021339	15.914387143714	18.5225653689971	23.6848599731511	24.2675551448341
ENSMUSG00000021340	1.4707144555207	2.02288464135915	1.31434553018399	2.69439549307312
ENSMUSG00000021356	6.01470804063854	4.0972085188256	9.05924221478106	5.2216976187758
ENSMUSG00000021357	81.5082526549583	73.4622829397287	80.6615185112109	71.3732095657951
ENSMUSG00000021360	104.191776746454	111.834889460673	75.9920043106001	80.5843206712789
ENSMUSG00000021361	65.5401414453864	76.4988073905389	58.1392132178966	60.1656563429506
ENSMUSG00000021365	236.750687073388	206.334019903913	250.004809562285	225.758912634919
ENSMUSG00000021366	46.7587743590912	43.8999573051262	46.9161897730559	47.6765226980575
ENSMUSG00000021368	2.81832030047785	3.14521399435829	2.30581694978356	2.30311924740943
ENSMUSG00000021371	37.7558781767341	37.7932279356045	41.3646285799547	44.2331317781343
ENSMUSG00000021374	34.5973301311895	31.6909251385445	42.1275294735121	45.5861654451752
ENSMUSG00000021375	21.3671740830886	22.2994133538881	15.5611022661901	15.1777856330355
ENSMUSG00000021377	100.184328172204	168.730031413536	121.744186300339	124.316359991355
ENSMUSG00000021384	22.7556536973724	16.9990788443883	22.1990821134286	14.136327373374
ENSMUSG00000021385	3.73357673420763	3.2399813411866	4.37364661408215	5.5352526458433
ENSMUSG00000021391	3.11216310156405	3.62025771369837	5.49762444608879	4.29311700534477
ENSMUSG00000021392	6.4266693636675	7.35587679120745	5.226283095506	6.78084009618678
ENSMUSG00000021395	37.7843655687339	36.9476333086671	50.2171603320262	48.5992692853015
ENSMUSG00000021400	10.0477040033175	10.6252049796555	13.9635264080533	15.5910483300588
ENSMUSG00000021408	80.7552494379494	74.8589847025422	72.2764652800032	74.6755521928241
ENSMUSG00000021413	22.4196536670809	22.0833280911884	27.9177070577208	30.1148253798186
ENSMUSG00000021417	11.5968092447032	14.1667331452575	16.0626411335512	17.6304260837171
ENSMUSG00000021420	6.02131125609308	5.60090912458241	5.97204453216381	6.53287186774547
ENSMUSG00000021423	17.694535442862	20.2750195606048	16.3676228972855	14.0277257249438
ENSMUSG00000021427	97.412309346669	113.26107818161	83.2561659424583	100.159369760705
ENSMUSG00000021428	42.685540397204	51.3761532765003	30.0877110435018	32.1405188241626
ENSMUSG00000021431	6.0960635205857	6.53875673783943	5.26323839199722	4.90460583739529
ENSMUSG00000021432	4.67376892428951	4.9844597026905	3.7248295521713	4.57804812266641
ENSMUSG00000021451	167.237315077355	145.651143224216	140.357548173144	145.545051505415
ENSMUSG00000021453	12.9101277976045	17.5689332712071	11.1397537039567	8.48115995469208
ENSMUSG00000021457	690.280029176725	574.106311671803	665.342590782573	663.235729371755
ENSMUSG00000021458	3.68994681114899	3.10722917053443	4.95848721771204	6.09012524874449
ENSMUSG00000021460	14.0282995284382	14.8243725771225	13.8426931790545	15.9182261915325
ENSMUSG00000021461	2.88832212786564	2.50153500745796	2.74543723175503	2.01508484266514
ENSMUSG00000021466	2.10655112842007	1.43754885781075	2.00579183540557	2.81779263711854
ENSMUSG00000021468	36.4023993394143	34.8270240116167	29.5162408026902	29.8152980553289
ENSMUSG00000021470	3.57034822311757	3.76224062648476	4.33653325318505	4.65680465871716
ENSMUSG00000021474	25.7605387666538	24.5849576680184	33.7612015758852	37.5500601358042
ENSMUSG00000021476	1.99947850597012	1.36869171071782	2.75457510939884	2.67623937022204
ENSMUSG00000021477	14.6520523846563	15.6774555273075	15.9620139256444	17.1637441516979
ENSMUSG00000021481	5.00668648570535	4.19500016719513	5.26890914735	5.21156296556696
ENSMUSG00000021482	16.1407253299613	16.0672956603403	15.8841971781167	17.7850609712874
ENSMUSG00000021484	175.771907433727	175.389235141886	145.171783170263	153.749124052628
ENSMUSG00000021485	14.0163805033046	13.7869335233465	19.6470191789353	20.2750424842315
ENSMUSG00000021486	334.988038436733	383.257999303432	271.54759594622	296.177321754459
ENSMUSG00000021488	64.0399339518029	58.2437960628994	57.0902626564933	64.7086704911878
ENSMUSG00000021493	121.150533000506	118.272994817621	83.8841644766518	81.2309141684087
ENSMUSG00000021494	41.8852451412348	41.1313489159209	39.6355993135871	38.6042321828764
ENSMUSG00000021495	11.5667320784155	12.0439578438395	9.68027263803118	10.385719261746
ENSMUSG00000021496	19.584537658846	21.6133994396707	21.9785748389445	21.8387999903673
ENSMUSG00000021497	16.9849335856201	16.6599923591978	19.8095203968144	19.282003838561
ENSMUSG00000021500	91.2536569241546	97.0375685894731	101.536148628246	101.601589306176
ENSMUSG00000021501	8.11774201663358	7.18673601472864	8.24755831422932	7.87437399544523
ENSMUSG00000021504	7.99687484696653	6.69253872190881	8.69444709207834	9.1401167306639
ENSMUSG00000021510	14.446886659295	12.493008156948	14.7765547828912	14.3739694658323
ENSMUSG00000021514	1.24405190695841	1.39213249351116	3.17872266420506	3.12991053126011
ENSMUSG00000021518	42.1994125197085	44.3003918534707	40.7592341011345	43.5636496328905
ENSMUSG00000021519	5.57530505319556	6.9320094645925	5.62177968978721	6.32066705325626
ENSMUSG00000021520	22.9866187432162	32.9051057698312	23.9778274025492	26.5361793115192
ENSMUSG00000021537	26.2967613905126	32.2344736718187	32.1821963844878	32.8421095930805
[truncated: 8,611 more rows]

## Sheet: S3 (DEG)
	B6 vs Balbc	geneName	DE	Log2FC	fold	adj.P.Val		TC1 vs CT26	geneName	DE	Log2FC	fold	adj.P.Val		B6 vs TC1	geneName	DE	Log2FC	fold	adj.P.Val		Balbc vs CT26	geneName	DE	Log2FC	fold	adj.P.Val
	ENSMUSG00000116957	Gm34680	1	13.9325	15635.6	3.2162e-280		ENSMUSG00000066258	Trim12a	1	14.3137	20363.1	8.26883e-300		ENSMUSG00000076547	Igkv4-70	1	5.85885	58.0348	4.21754e-06		ENSMUSG00000096844	Igkv6-14	1	7.28685	156.157	6.26032e-06
	ENSMUSG00000051490	Foxd4	1	11.62	3147.61	8.71131e-89		ENSMUSG00000116957	Gm34680	1	13.7437	13717.5	0		ENSMUSG00000090215	Trim34b	0	4.94925	30.8939	0.0694772		ENSMUSG00000076562	Igkv4-50	0	3.63367	12.4121	0.365382
	ENSMUSG00000066258	Trim12a	1	11.2397	2418.2	1.14098e-229		ENSMUSG00000087259	2610035D17Rik	1	10.5909	1542.35	4.58091e-65		ENSMUSG00000113036	Gm47021	0	4.82959	28.4349	0.0878369		ENSMUSG00000105703	Gm43305	0	3.465	11.0425	0.612619
	ENSMUSG00000085882	2610507I01Rik	1	10.7257	1693.34	8.72593e-167		ENSMUSG00000038775	Vill	1	10.58	1530.71	0		ENSMUSG00000089993	Gm5822	0	4.22964	18.7606	0.0532297		ENSMUSG00000066258	Trim12a	0	3.08872	8.50739	0.788849
	ENSMUSG00000087259	2610035D17Rik	1	10.2396	1209	2.41975e-47		ENSMUSG00000070868	Skint3	1	10.3776	1330.38	7.6508e-43		ENSMUSG00000076552	Igkv4-61	1	3.58067	11.9643	0.011153		ENSMUSG00000096490	Igkv10-94	0	2.81541	7.03917	0.403077
	ENSMUSG00000038775	Vill	1	10.1994	1175.75	0		ENSMUSG00000006154	Eps8l1	1	10.3257	1283.39	6.10863e-28		ENSMUSG00000076562	Igkv4-50	0	3.50231	11.3319	0.387977		ENSMUSG00000045868	Gvin1	0	2.5838	5.99517	1
	ENSMUSG00000070868	Skint3	1	9.99191	1018.27	4.98329e-31		ENSMUSG00000086938	4930481A15Rik	1	10.1754	1156.4	3.86871e-36		ENSMUSG00000076576	Igkv6-32	0	3.07662	8.43636	0.202235		ENSMUSG00000001506	Col1a1	0	2.44898	5.46028	0.203932
	ENSMUSG00000097295	Hmgb1-ps8	1	9.87534	939.234	2.06819e-23		ENSMUSG00000029306	Ibsp	1	10.081	1083.1	1.78111e-33		ENSMUSG00000081453	Gm6767	0	3.06452	8.36591	0.267823		ENSMUSG00000076596	Igkv3-10	0	2.26195	4.79638	1
	ENSMUSG00000084803	5830444B04Rik	1	9.5859	768.498	9.33144e-20		ENSMUSG00000084803	5830444B04Rik	1	9.84709	921.02	2.42965e-26		ENSMUSG00000094797	Igkv6-15	1	2.99967	7.99816	0.0329998		ENSMUSG00000076545	Igkv4-72	0	2.00269	4.00745	0.720402
	ENSMUSG00000006154	Eps8l1	1	9.42618	687.96	3.99117e-18		ENSMUSG00000105703	Gm43305	1	9.74957	860.821	2.63844e-28		ENSMUSG00000086513	9130208D14Rik	0	2.88202	7.37181	0.573337		ENSMUSG00000076549	Igkv4-68	0	1.87096	3.65775	0.239061
	ENSMUSG00000068417	Pnp2	1	9.35447	654.601	5.88507e-27		ENSMUSG00000113010	Gm34084	1	9.62461	789.4	3.61446e-139		ENSMUSG00000117278	AC166110.4	0	2.87248	7.32324	0.57564		ENSMUSG00000064357	mt-Atp6	0	1.85557	3.61894	0.462175
	ENSMUSG00000093954	Gm16867	1	9.34919	652.211	1.21784e-29		ENSMUSG00000051490	Foxd4	1	9.49684	722.494	6.30186e-110		ENSMUSG00000096638	Ighv2-9	1	2.77311	6.83582	0.0290463		ENSMUSG00000112539	Gm40787	0	1.84577	3.59445	0.091213
	ENSMUSG00000113010	Gm34084	1	9.13465	562.087	3.13308e-106		ENSMUSG00000097295	Hmgb1-ps8	1	9.32526	641.479	1.07406e-34		ENSMUSG00000117822	AC133509.1	0	2.72136	6.59494	0.21917		ENSMUSG00000086938	4930481A15Rik	0	1.81565	3.52019	1
	ENSMUSG00000073405	H2-T-ps	1	9.06051	533.93	8.73683e-24		ENSMUSG00000093954	Gm16867	1	9.22976	600.393	6.87341e-35		ENSMUSG00000096844	Igkv6-14	0	2.37259	5.1787	0.451199		ENSMUSG00000096459	Ighv9-3	0	1.61079	3.05419	0.183226
	ENSMUSG00000060441	Trim5	1	8.64322	399.822	4.77034e-82		ENSMUSG00000047507	Baiap3	1	8.73892	427.244	7.82955e-53		ENSMUSG00000103206	Gm8515	0	2.17316	4.51011	0.538073		ENSMUSG00000076569	Igkv5-39	0	1.48522	2.7996	0.239061
	ENSMUSG00000047507	Baiap3	1	8.62961	396.069	7.94216e-45		ENSMUSG00000085882	2610507I01Rik	1	8.64345	399.889	1.45779e-187		ENSMUSG00000022240	Ctnnd2	1	2.09898	4.28407	0.0451969		ENSMUSG00000020599	Rgs9	1	1.4453	2.72319	0.0140141
	ENSMUSG00000105987	AI506816	1	8.53459	370.825	2.60007e-77		ENSMUSG00000045868	Gvin1	1	8.52762	369.036	5.30751e-29		ENSMUSG00000057036	Gm7536	0	1.97916	3.94265	0.588893		ENSMUSG00000057596	Trim30d	0	1.44362	2.72002	0.612564
	ENSMUSG00000093896	Ighv1-76	1	8.52246	367.72	3.22973e-12		ENSMUSG00000060441	Trim5	1	8.43298	345.605	7.80295e-113		ENSMUSG00000076591	Igkv8-16	0	1.8605	3.63135	0.538073		ENSMUSG00000038418	Egr1	1	1.43045	2.6953	0.00175461
	ENSMUSG00000109876	Gm45449	1	8.39717	337.131	9.46919e-18		ENSMUSG00000057596	Trim30d	1	8.01948	259.481	8.36093e-95		ENSMUSG00000076535	Igkv1-88	0	1.80927	3.50465	0.611063		ENSMUSG00000025889	Snca	0	1.42606	2.68711	0.245664
	ENSMUSG00000029306	Ibsp	1	8.32545	320.783	3.0258e-16		ENSMUSG00000105987	AI506816	1	7.9096	240.451	1.32227e-94		ENSMUSG00000030470	Csrp3	0	1.78679	3.45046	0.0699263		ENSMUSG00000095007	Igkv12-41	0	1.42531	2.68572	0.811886
	ENSMUSG00000071562	Stfa1	1	8.0457	264.24	2.33204e-33		ENSMUSG00000071562	Stfa1	1	7.903	239.354	8.48323e-43		ENSMUSG00000067017	Gm3608	0	1.71284	3.27805	0.596081		ENSMUSG00000069919	Hba-a1	0	1.4058	2.64964	0.115506
	ENSMUSG00000086938	4930481A15Rik	1	8.02072	259.702	1.05007e-24		ENSMUSG00000106325	Ighv8-10	1	7.1389	140.936	3.57534e-31		ENSMUSG00000069117	Gm10260	0	1.66871	3.1793	0.56911		ENSMUSG00000073940	Hbb-bt	0	1.3743	2.59241	0.203932
	ENSMUSG00000048188	Gm8181	1	7.9318	244.179	0.000372421		ENSMUSG00000068417	Pnp2	1	7.10779	137.93	1.1287e-36		ENSMUSG00000097891	Gm3650	0	1.63835	3.1131	0.763282		ENSMUSG00000076564	Igkv12-46	0	1.36326	2.57266	0.951014
	ENSMUSG00000105703	Gm43305	1	7.1465	141.681	7.11526e-23		ENSMUSG00000067235	H2-Q10	1	7.0935	136.571	1.97336e-183		ENSMUSG00000076555	Igkv4-57-1	0	1.6127	3.05824	0.474383		ENSMUSG00000103297	Ighv3-2	0	1.35107	2.55101	0.0506627
	ENSMUSG00000045868	Gvin1	1	6.91733	120.871	3.77965e-31		ENSMUSG00000086773	Gm16192	1	6.67625	102.271	2.10574e-32		ENSMUSG00000017978	Cadps2	0	1.55345	2.93519	0.267823		ENSMUSG00000069917	Hba-a2	0	1.32299	2.50184	0.746762
	ENSMUSG00000082045	Gm11585	1	6.90409	119.767	4.97977e-47		ENSMUSG00000073405	H2-T-ps	1	6.52455	92.0632	1.61983e-26		ENSMUSG00000029108	Pcdh7	1	1.51778	2.8635	0.0356928		ENSMUSG00000032487	Ptgs2	1	1.32295	2.50177	0.00434161
	ENSMUSG00000067235	H2-Q10	1	6.8373	114.349	1.69948e-139		ENSMUSG00000109876	Gm45449	1	6.46757	88.4975	6.31727e-21		ENSMUSG00000095753	Igkv4-53	0	1.46477	2.76019	0.562821		ENSMUSG00000074903	Gm2058	0	1.31921	2.4953	1
	ENSMUSG00000057596	Trim30d	1	6.49486	90.1877	1.15308e-64		ENSMUSG00000082045	Gm11585	1	6.36179	82.2415	3.23477e-54		ENSMUSG00000076556	Igkv4-57	0	1.43716	2.70787	0.552791		ENSMUSG00000037849	Ifi206	0	1.31868	2.49437	1
	ENSMUSG00000000530	Acvrl1	1	6.38415	83.526	5.49326e-155		ENSMUSG00000093896	Ighv1-76	1	6.28621	78.0437	8.51126e-14		ENSMUSG00000076615	Ighg3	0	1.43094	2.69622	0.22823		ENSMUSG00000030865	Chp2	0	1.30827	2.47644	0.36452
	ENSMUSG00000106325	Ighv8-10	1	6.07458	67.3954	2.7578e-24		ENSMUSG00000102051	I830127L07Rik	1	6.05075	66.2912	9.58906e-214		ENSMUSG00000076569	Igkv5-39	0	1.42622	2.68741	0.269312		ENSMUSG00000029417	Cxcl9	0	1.30143	2.46473	0.365382
	ENSMUSG00000087366	Junos	1	5.9089	60.0835	2.6109e-26		ENSMUSG00000000530	Acvrl1	1	6.04741	66.1379	6.24205e-180		ENSMUSG00000079071	Gm14085	0	1.42014	2.67611	0.550929		ENSMUSG00000076940	Iglv2	0	1.28834	2.44247	0.755361
	ENSMUSG00000102051	I830127L07Rik	1	5.87911	58.8558	1.48111e-163		ENSMUSG00000060550	H2-Q7	1	5.89922	59.682	7.85917e-27		ENSMUSG00000100863	Gm12669	0	1.41199	2.66104	0.720913		ENSMUSG00000052305	Hbb-bs	0	1.26662	2.40598	0.40814
	ENSMUSG00000086773	Gm16192	1	5.80999	56.1023	8.30838e-24		ENSMUSG00000037849	Ifi206	1	5.79308	55.4488	1.57398e-23		ENSMUSG00000054072	Iigp1	0	1.40466	2.64756	0.139797		ENSMUSG00000067203	H2-K2	0	1.26652	2.40581	0.541816
	ENSMUSG00000073902	Gm1966	1	5.7856	55.1618	3.10757e-109		ENSMUSG00000102535	Ighv1-41	1	5.46767	44.2519	8.55875e-32		ENSMUSG00000076549	Igkv4-68	0	1.40433	2.64695	0.451199		ENSMUSG00000104913	Gm6560	0	1.25586	2.38809	1
	ENSMUSG00000069830	Nlrp1a	1	5.67127	50.9593	2.44292e-46		ENSMUSG00000116380	Gm39556	1	5.46763	44.2506	5.50267e-163		ENSMUSG00000032656	March3	0	1.39057	2.62182	0.202235		ENSMUSG00000047953	Gp5	0	1.23565	2.35488	0.772104
	ENSMUSG00000021696	Elovl7	1	5.56921	47.4786	1.25434e-71		ENSMUSG00000117465	AC102496.1	1	5.44147	43.4555	1.86202e-25		ENSMUSG00000044285	Gm1821	0	1.36054	2.56782	0.31538		ENSMUSG00000071041	Impdh2-ps	0	1.21632	2.32354	1
	ENSMUSG00000095028	Sirpb1b	1	5.51182	45.6272	1.04397e-84		ENSMUSG00000029561	Oasl2	1	5.4332	43.2072	1.75494e-67		ENSMUSG00000040380	Cbln3	0	1.31599	2.48972	0.149296		ENSMUSG00000024812	Tjp2	0	1.21364	2.31922	0.36452
	ENSMUSG00000060550	H2-Q7	1	5.47844	44.5834	1.95201e-20		ENSMUSG00000073902	Gm1966	1	5.3448	40.6391	2.50062e-120		ENSMUSG00000028373	Astn2	0	1.29228	2.44916	0.254328		ENSMUSG00000075279	Mrpl23-ps1	0	1.21325	2.3186	1
	ENSMUSG00000095589	Ighv1-55	1	5.2834	38.946	1.3754e-16		ENSMUSG00000095028	Sirpb1b	1	4.97448	31.4389	1.2e-90		ENSMUSG00000082791	Gm4875	0	1.28583	2.43822	0.624492		ENSMUSG00000106325	Ighv8-10	0	1.21221	2.31692	1
	ENSMUSG00000092418	Gm20406	1	5.25653	38.2273	3.28918e-14		ENSMUSG00000021696	Elovl7	1	4.90625	29.9868	1.34013e-73		ENSMUSG00000076563	Igkv5-48	0	1.27619	2.42198	0.252108		ENSMUSG00000025270	Alas2	0	1.17749	2.26183	0.64839
	ENSMUSG00000116380	Gm39556	1	5.22277	37.343	6.9248e-125		ENSMUSG00000000157	Itgb2l	1	4.87661	29.3769	1.59502e-170		ENSMUSG00000104222	Gm7292	0	1.2455	2.37101	0.773717		ENSMUSG00000076281	Gm24270	1	1.14048	2.20454	0.00100001
	ENSMUSG00000001604	Tcea3	1	5.2189	37.2432	5.19745e-20		ENSMUSG00000092418	Gm20406	1	4.87129	29.2687	4.93424e-16		ENSMUSG00000032556	Bfsp2	0	1.1726	2.25418	0.366536		ENSMUSG00000083833	Gm13841	0	1.1295	2.18783	0.24913
	ENSMUSG00000000157	Itgb2l	1	5.2107	37.032	1.8581e-152		ENSMUSG00000087366	Junos	1	4.79839	27.8266	2.83941e-27		ENSMUSG00000026390	Marco	0	1.1383	2.20122	0.602051		ENSMUSG00000094433	Igkv5-43	0	1.12835	2.18608	0.811886
	ENSMUSG00000029561	Oasl2	1	5.14843	35.4676	8.68003e-51		ENSMUSG00000097705	Gm26740	1	4.6925	25.8573	4.8178e-71		ENSMUSG00000104913	Gm6560	0	1.11676	2.1686	0.788494		ENSMUSG00000114554	5430425K12Rik	0	1.11859	2.17135	0.397382
	ENSMUSG00000117465	AC102496.1	1	5.08774	34.0065	6.01397e-18		ENSMUSG00000052749	Trim30b	1	4.68837	25.7834	2.87343e-106		ENSMUSG00000082536	Gm13456	0	1.11188	2.16128	0.43289		ENSMUSG00000094627	Gm10182	0	1.11656	2.16829	0.17316
	ENSMUSG00000094546	Ighv1-26	1	4.93365	30.5616	3.05569e-08		ENSMUSG00000093894	Ighv1-53	1	4.63566	24.8584	2.24349e-12		ENSMUSG00000095351	Igkv3-2	0	1.10209	2.14666	0.684876		ENSMUSG00000054072	Iigp1	0	1.0896	2.12815	0.72435
	ENSMUSG00000093894	Ighv1-53	1	4.85911	29.0226	8.95598e-13		ENSMUSG00000112539	Gm40787	1	4.38717	20.9252	1.51927e-21		ENSMUSG00000076536	Igkv4-86	0	1.08112	2.11568	0.664454		ENSMUSG00000073538	E330020D12Rik	0	1.08639	2.12342	0.832017
	ENSMUSG00000094088	Ighv1-64	1	4.83231	28.4885	1.25651e-29		ENSMUSG00000001604	Tcea3	1	4.34787	20.3628	3.87114e-19		ENSMUSG00000092060	Bend4	0	1.07919	2.11286	0.3947		ENSMUSG00000052336	Cx3cr1	1	1.08635	2.12336	0.000444566
	ENSMUSG00000037849	Ifi206	1	4.76131	27.1206	1.21921e-17		ENSMUSG00000034641	Cd300ld	1	4.32454	20.0363	1.17435e-161		ENSMUSG00000089956	Gm16553	0	1.06369	2.09027	0.467743		ENSMUSG00000085172	Gm6542	0	1.0753	2.10717	1
	ENSMUSG00000034641	Cd300ld	1	4.6979	25.9542	3.95343e-150		ENSMUSG00000015937	H2afy	1	4.31697	19.9314	4.21533e-166		ENSMUSG00000094006	Igkv4-59	0	1.03939	2.05536	0.664519		ENSMUSG00000076613	Ighg2b	0	1.06972	2.09903	0.746762
	ENSMUSG00000052749	Trim30b	1	4.60061	24.2617	9.14957e-85		ENSMUSG00000075279	Mrpl23-ps1	1	4.26359	19.2074	6.04267e-05		ENSMUSG00000094546	Ighv1-26	0	1.03791	2.05325	0.616734		ENSMUSG00000045954	Cavin2	0	1.06257	2.08865	1
	ENSMUSG00000102535	Ighv1-41	1	4.5627	23.6324	3.3582e-21		ENSMUSG00000094546	Ighv1-26	1	4.22919	18.7548	1.03779e-07		ENSMUSG00000067925	Rtl8a	0	1.02851	2.03992	0.237855		ENSMUSG00000025876	Unc5a	0	1.0458	2.06451	1
	ENSMUSG00000019851	Perp	1	4.51234	22.8217	4.02646e-11		ENSMUSG00000069830	Nlrp1a	1	4.15391	17.8013	9.07204e-40		ENSMUSG00000105606	Igkv2-109	0	1.01118	2.01556	0.616118		ENSMUSG00000000982	Ccl3	0	1.03828	2.05378	0.25915
	ENSMUSG00000074419	Gm15448	1	4.50141	22.6496	6.03271e-36		ENSMUSG00000048758	Rpl29	1	4.14867	17.7368	1.19967e-127		ENSMUSG00000063354	Slc39a4	1	1.01109	2.01543	0.0329998		ENSMUSG00000102975	Gm37347	0	1.03381	2.04743	0.772104
	ENSMUSG00000097705	Gm26740	1	4.45465	21.9272	7.13445e-56		ENSMUSG00000102153	Gm37474	1	4.07016	16.7974	6.55201e-08		ENSMUSG00000028992	Nmnat1	0	0.981013	1.97385	0.371257		ENSMUSG00000076598	Igkv3-7	0	1.03349	2.04698	1
	ENSMUSG00000048758	Rpl29	1	4.42567	21.4911	4.16808e-116		ENSMUSG00000035539	Ccdc180	1	3.97968	15.7763	1.17317e-17		ENSMUSG00000045868	Gvin1	0	0.973513	1.96362	0.252108		ENSMUSG00000065037	Rn7sk	1	1.0331	2.04641	0.00680152
	ENSMUSG00000040624	Plekhg1	1	4.33478	20.179	3.07714e-52		ENSMUSG00000114493	Gm47071	1	3.97294	15.7027	9.04047e-88		ENSMUSG00000022367	Has2	0	0.971467	1.96083	0.157595		ENSMUSG00000097534	Gm16675	0	1.02857	2.04	0.063503
	ENSMUSG00000015937	H2afy	1	4.19149	18.2711	2.47579e-130		ENSMUSG00000104449	Gm37255	1	3.96162	15.58	2.55159e-05		ENSMUSG00000045087	S1pr5	0	0.962175	1.94825	0.440274		ENSMUSG00000076577	Igkv8-30	0	1.02456	2.03435	1
	ENSMUSG00000087289	4933424M12Rik	1	3.97009	15.6717	7.02708e-28		ENSMUSG00000074419	Gm15448	1	3.89563	14.8834	1.02549e-35		ENSMUSG00000032733	Snx33	0	0.952009	1.93456	0.268215		ENSMUSG00000097347	Gm17275	0	1.02301	2.03216	0.373274
	ENSMUSG00000035539	Ccdc180	1	3.91809	15.1169	2.23556e-14		ENSMUSG00000051906	Cd209f	1	3.89552	14.8822	3.71289e-17		ENSMUSG00000046753	Ccdc66	0	0.94711	1.92801	0.343741		ENSMUSG00000095981	Ighv10-1	0	0.981987	1.97518	1
	ENSMUSG00000097352	C920009B18Rik	1	3.84325	14.3527	2.65532e-13		ENSMUSG00000025876	Unc5a	1	3.87287	14.6504	1.89704e-09		ENSMUSG00000105504	Gbp5	0	0.937111	1.91469	0.557885		ENSMUSG00000094117	Igkv3-12	0	0.981207	1.97412	1
	ENSMUSG00000052861	Dnah6	1	3.81763	14.1001	1.50992e-42		ENSMUSG00000022586	Ly6i	1	3.81661	14.0901	9.05972e-07		ENSMUSG00000096422	Igkv12-44	0	0.932808	1.90899	0.622636		ENSMUSG00000076258	Gm23935	1	0.977059	1.96845	0.00075007
	ENSMUSG00000073489	Ifi204	1	3.80881	14.0141	3.07675e-61		ENSMUSG00000073489	Ifi204	1	3.795	13.8806	7.6411e-72		ENSMUSG00000051977	Prdm9	0	0.928033	1.90268	0.43289		ENSMUSG00000030159	Clec1b	0	0.971111	1.96035	0.907317
	ENSMUSG00000085915	Gm8091	1	3.75231	13.4759	7.1321e-47		ENSMUSG00000103094	Gm37558	1	3.78606	13.7949	0.000103515		ENSMUSG00000079491	H2-T10	0	0.912904	1.88283	0.447011		ENSMUSG00000091649	Phf11b	0	0.966154	1.95363	0.670647
	ENSMUSG00000114493	Gm47071	1	3.64063	12.4721	5.16735e-65		ENSMUSG00000109429	Gm45223	1	3.78494	13.7841	1.76368e-07		ENSMUSG00000099397	Gm7809	0	0.903492	1.87059	0.67009		ENSMUSG00000095079	Igha	0	0.963899	1.95057	0.387294
	ENSMUSG00000026390	Marco	1	3.60442	12.163	5.41933e-05		ENSMUSG00000060938	Rpl26	1	3.65522	12.5988	5.1439e-127		ENSMUSG00000095630	Igkv6-23	0	0.900624	1.86687	0.509743		ENSMUSG00000102037	Bcl2a1a	0	0.963383	1.94988	0.536215
	ENSMUSG00000060938	Rpl26	1	3.60311	12.1519	2.33931e-103		ENSMUSG00000091509	Gm17066	1	3.62433	12.332	4.45161e-12		ENSMUSG00000059897	Zfp930	0	0.900182	1.8663	0.58191		ENSMUSG00000084012	Gm11956	0	0.952999	1.93589	0.911271
	ENSMUSG00000104449	Gm37255	1	3.55018	11.7142	0.00125223		ENSMUSG00000019851	Perp	1	3.62355	12.3253	5.61935e-10		ENSMUSG00000053541	Gm4759	0	0.885099	1.84689	0.447011		ENSMUSG00000117485	AC132455.2	0	0.951138	1.9334	0.327697
	ENSMUSG00000026536	Ifi211	1	3.51155	11.4046	2.98782e-16		ENSMUSG00000052861	Dnah6	1	3.58407	11.9926	1.87237e-43		ENSMUSG00000007379	Dennd2c	0	0.884572	1.84622	0.368565		ENSMUSG00000031613	Hpgd	0	0.944014	1.92387	0.25915
	ENSMUSG00000078684	5830417I10Rik	1	3.4677	11.0632	1.70837e-43		ENSMUSG00000086296	D030055H07Rik	1	3.55464	11.7504	3.56549e-22		ENSMUSG00000095794	Igkv6-17	0	0.878277	1.83818	0.602051		ENSMUSG00000117059	AC154766.1	0	0.942962	1.92247	0.397382
	ENSMUSG00000022586	Ly6i	1	3.42526	10.7425	3.97985e-05		ENSMUSG00000095589	Ighv1-55	1	3.54902	11.7047	1.11237e-10		ENSMUSG00000037845	Fdxacb1	0	0.876317	1.83568	0.368565		ENSMUSG00000105606	Igkv2-109	0	0.939043	1.91726	1
	ENSMUSG00000027230	Creb3l1	1	3.36093	10.274	1.30944e-37		ENSMUSG00000085915	Gm8091	1	3.5265	11.5234	4.48203e-50		ENSMUSG00000095589	Ighv1-55	0	0.871455	1.82951	0.509743		ENSMUSG00000076672	Ighv3-6	0	0.935526	1.91259	0.809446
	ENSMUSG00000118140	AC134576.3	1	3.34822	10.1839	2.60767e-10		ENSMUSG00000074896	Ifit3	1	3.424	10.7331	1.37341e-22		ENSMUSG00000105703	Gm43305	0	0.861935	1.81747	0.543601		ENSMUSG00000029372	Ppbp	0	0.935475	1.91252	1
	ENSMUSG00000030410	Dmwd	1	3.32798	10.042	6.87157e-41		ENSMUSG00000078684	5830417I10Rik	1	3.41376	10.6573	7.02505e-49		ENSMUSG00000073409	H2-Q6	0	0.85879	1.81352	0.125304		ENSMUSG00000075370	Igll1	0	0.928546	1.90336	0.491461
	ENSMUSG00000025876	Unc5a	1	3.25195	9.52651	1.19244e-06		ENSMUSG00000040624	Plekhg1	1	3.40261	10.5752	5.43065e-42		ENSMUSG00000078921	Tgtp2	0	0.851832	1.80479	0.447011		ENSMUSG00000092074	Dynlt1a	0	0.927404	1.90185	1
	ENSMUSG00000032135	Mcam	1	3.22314	9.33817	2.05581e-22		ENSMUSG00000022665	Ccdc80	1	3.37085	10.3449	2.22443e-24		ENSMUSG00000073968	Trim68	0	0.849572	1.80197	0.451199		ENSMUSG00000026768	Itga8	0	0.924254	1.8977	0.569413
	ENSMUSG00000048480	Cxcr1	1	3.21229	9.2682	2.20537e-11		ENSMUSG00000042821	Snai1	1	3.36012	10.2683	5.5911e-12		ENSMUSG00000030323	Ift122	0	0.847404	1.79926	0.584272		ENSMUSG00000106106	CT010467.1	0	0.92385	1.89717	0.288515
	ENSMUSG00000078502	Gm13212	1	3.20096	9.19572	2.09856e-11		ENSMUSG00000041025	Iffo2	1	3.29949	9.84568	1.19353e-16		ENSMUSG00000030785	Cox6a2	0	0.841115	1.79143	0.493244		ENSMUSG00000095571	Ighv5-17	0	0.921954	1.89468	1
	ENSMUSG00000025491	Ifitm1	1	3.18329	9.08378	2.65648e-79		ENSMUSG00000030410	Dmwd	1	3.23198	9.39557	1.83724e-45		ENSMUSG00000038637	Lrrc56	0	0.8266	1.7735	0.286609		ENSMUSG00000074896	Ifit3	0	0.918789	1.89053	0.403077
	ENSMUSG00000056973	Ces1d	1	3.18088	9.06858	7.11526e-23		ENSMUSG00000087289	4933424M12Rik	1	3.1977	9.17495	4.37274e-24		ENSMUSG00000046330	Rpl37a	0	0.822595	1.76858	0.582693		ENSMUSG00000076615	Ighg3	0	0.910631	1.87987	0.901892
	ENSMUSG00000051906	Cd209f	1	3.15706	8.92011	2.9294e-10		ENSMUSG00000062939	Stat4	1	3.18606	9.10122	1.88225e-34		ENSMUSG00000023011	Faim2	0	0.818884	1.76404	0.550929		ENSMUSG00000040380	Cbln3	0	0.905923	1.87374	0.536215
	ENSMUSG00000023011	Faim2	1	3.13466	8.78267	9.35961e-09		ENSMUSG00000044229	Nxpe4	1	3.10069	8.57831	0.000255339		ENSMUSG00000076522	Igkv16-104	0	0.817975	1.76293	0.756973		ENSMUSG00000025867	Cplx2	0	0.896677	1.86177	0.679994
	ENSMUSG00000027313	Chac1	1	3.13312	8.77331	1.57693e-26		ENSMUSG00000092341	Malat1	1	3.06224	8.35268	1.84666e-09		ENSMUSG00000076514	Igkv17-121	0	0.800106	1.74123	0.664519		ENSMUSG00000102535	Ighv1-41	0	0.889175	1.85212	1
	ENSMUSG00000022665	Ccdc80	1	3.13203	8.76667	1.66973e-17		ENSMUSG00000079547	H2-DMb1	1	2.99143	7.95261	7.49455e-35		ENSMUSG00000076596	Igkv3-10	0	0.789477	1.72845	0.872858		ENSMUSG00000020592	Sdc1	0	0.889158	1.85209	0.772104
	ENSMUSG00000062939	Stat4	1	3.07616	8.43369	1.0698e-27		ENSMUSG00000030409	Dmpk	1	2.98089	7.89474	6.88061e-31		ENSMUSG00000093894	Ighv1-53	0	0.783006	1.72071	0.604159		ENSMUSG00000053226	Dand5	0	0.883942	1.84541	0.402131
	ENSMUSG00000031776	Arl2bp	1	2.97239	7.84835	1.73088e-59		ENSMUSG00000025491	Ifitm1	1	2.98087	7.8946	9.25055e-85		ENSMUSG00000076564	Igkv12-46	0	0.77685	1.71339	0.739086		ENSMUSG00000060550	H2-Q7	0	0.877863	1.83765	1
	ENSMUSG00000074896	Ifit3	1	2.96446	7.80535	2.58751e-15		ENSMUSG00000056973	Ces1d	1	2.96958	7.83309	2.53798e-23		ENSMUSG00000049124	Gm8186	0	0.774927	1.7111	0.633917		ENSMUSG00000030149	Klrk1	0	0.865765	1.82231	0.929416
	ENSMUSG00000112539	Gm40787	1	2.95151	7.73559	2.85821e-12		ENSMUSG00000117485	AC132455.2	1	2.94672	7.70996	2.32006e-19		ENSMUSG00000076613	Ighg2b	0	0.772618	1.70837	0.590224		ENSMUSG00000044229	Nxpe4	0	0.861264	1.81663	1
	ENSMUSG00000041161	Otud3	1	2.93842	7.66571	1.82896e-33		ENSMUSG00000031776	Arl2bp	1	2.9436	7.69328	1.81264e-68		ENSMUSG00000042121	Ssh1	1	0.764549	1.69884	0.0270827		ENSMUSG00000043953	Ccrl2	0	0.860763	1.816	0.24913
	ENSMUSG00000075279	Mrpl23-ps1	1	2.88178	7.37058	0.0146922		ENSMUSG00000027230	Creb3l1	1	2.9085	7.50839	2.10951e-34		ENSMUSG00000024084	Qpct	0	0.7597	1.69314	0.561909		ENSMUSG00000064330	Pde6h	0	0.850864	1.80358	0.854372
	ENSMUSG00000025092	Hspa12a	1	2.8314	7.11765	2.46868e-06		ENSMUSG00000031494	Cd209a	1	2.89915	7.45986	1.83892e-10		ENSMUSG00000031189	Aff2	0	0.755627	1.68837	0.269312		ENSMUSG00000063354	Slc39a4	0	0.847037	1.7988	0.106314
	ENSMUSG00000022799	Arhgap31	1	2.80491	6.98815	1.24331e-68		ENSMUSG00000076612	Ighg2c	1	2.88455	7.38474	0.0320439		ENSMUSG00000095007	Igkv12-41	0	0.754611	1.68718	0.739086		ENSMUSG00000022586	Ly6i	0	0.846279	1.79786	1
	ENSMUSG00000075602	Ly6a	1	2.79104	6.92128	2.80206e-06		ENSMUSG00000003549	Ercc1	1	2.85802	7.25018	1.12754e-27		ENSMUSG00000094420	Igkv10-96	0	0.751132	1.68311	0.616118		ENSMUSG00000041202	Pla2g2d	0	0.845529	1.79692	1
	ENSMUSG00000076612	Ighg2c	0	2.74663	6.71146	0.0724905		ENSMUSG00000031613	Hpgd	1	2.84503	7.18523	7.27952e-19		ENSMUSG00000047880	Cxcr5	0	0.748289	1.6798	0.657974		ENSMUSG00000073409	H2-Q6	0	0.841525	1.79194	0.136838
	ENSMUSG00000058600	Rpl30	1	2.73875	6.67491	3.19522e-57		ENSMUSG00000115276	9930017N22Rik	1	2.84091	7.16474	5.96393e-05		ENSMUSG00000095981	Ighv10-1	0	0.74748	1.67886	0.777597		ENSMUSG00000032556	Bfsp2	0	0.840287	1.79041	1
	ENSMUSG00000047281	Sfn	1	2.71531	6.56734	3.38759e-42		ENSMUSG00000048480	Cxcr1	1	2.81625	7.04329	4.31002e-11		ENSMUSG00000073492	Gm10521	0	0.744506	1.6754	0.447011		ENSMUSG00000038352	Arl5c	0	0.828157	1.77542	0.392646
	ENSMUSG00000032578	Cish	1	2.71246	6.5544	3.90534e-16		ENSMUSG00000028927	Padi2	1	2.78608	6.89753	5.33547e-23		ENSMUSG00000108732	2310043P16Rik	0	0.742691	1.67329	0.418991		ENSMUSG00000107317	Gm19719	0	0.825558	1.77222	1
	ENSMUSG00000091549	Gm6548	1	2.70617	6.52585	5.07847e-21		ENSMUSG00000045573	Penk	1	2.77399	6.83998	1.43172e-10		ENSMUSG00000063902	Gm7964	0	0.738063	1.66793	0.605032		ENSMUSG00000081094	Rpl19-ps11	0	0.825298	1.7719	1
	ENSMUSG00000042821	Snai1	1	2.69212	6.46261	1.47211e-06		ENSMUSG00000049357	4933408B17Rik	1	2.77054	6.82364	5.31079e-32		ENSMUSG00000095335	Igkv3-5	0	0.733931	1.66316	0.785953		ENSMUSG00000076552	Igkv4-61	0	0.824992	1.77153	1
	ENSMUSG00000003549	Ercc1	1	2.67439	6.38369	3.32835e-21		ENSMUSG00000032487	Ptgs2	1	2.76832	6.81316	1.81867e-19		ENSMUSG00000076677	Ighv6-3	0	0.729775	1.65838	0.774219		ENSMUSG00000003545	Fosb	0	0.813119	1.75701	0.0659017
	ENSMUSG00000086296	D030055H07Rik	1	2.62035	6.149	5.34252e-12		ENSMUSG00000032578	Cish	1	2.76411	6.7933	7.33403e-19		ENSMUSG00000070873	Lilra5	0	0.729114	1.65762	0.491803		ENSMUSG00000105906	Iglc1	0	0.809979	1.75319	0.693124
	ENSMUSG00000030409	Dmpk	1	2.60408	6.08002	8.70957e-22		ENSMUSG00000058600	Rpl30	1	2.7585	6.76694	1.92251e-67		ENSMUSG00000046603	Tcaim	0	0.727326	1.65557	0.447011		ENSMUSG00000029661	Col1a2	0	0.804943	1.74708	1
	ENSMUSG00000079547	H2-DMb1	1	2.59536	6.04339	8.89143e-23		ENSMUSG00000067341	H2-Eb2	1	2.75578	6.75418	9.12883e-05		ENSMUSG00000027478	Dnmt3b	0	0.727247	1.65548	0.491803		ENSMUSG00000061086	Myl4	0	0.800491	1.74169	0.693124
	ENSMUSG00000039617	Gm7488	0	2.58918	6.01755	0.112492		ENSMUSG00000047281	Sfn	1	2.72877	6.62892	5.31956e-49		ENSMUSG00000061577	Adgrg5	0	0.726538	1.65466	0.749515		ENSMUSG00000014453	Blk	0	0.800262	1.74142	0.884482
	ENSMUSG00000069792	Wfdc17	1	2.52236	5.74522	8.54257e-20		ENSMUSG00000022014	Epsti1	1	2.69079	6.45667	4.48287e-85		ENSMUSG00000030086	Chchd6	0	0.715987	1.64261	0.542555		ENSMUSG00000051339	2900026A02Rik	0	0.796807	1.73725	1
	ENSMUSG00000022126	Acod1	1	2.51883	5.73116	1.30675e-13		ENSMUSG00000027935	Rab13	1	2.68968	6.4517	3.2612e-18		ENSMUSG00000051790	Nlgn2	0	0.709079	1.63476	0.638545		ENSMUSG00000076586	Igkv8-21	0	0.791678	1.73109	1
	ENSMUSG00000097431	Gm26782	1	2.5094	5.69382	1.38522e-08		ENSMUSG00000094088	Ighv1-64	1	2.63951	6.23118	6.48085e-14		ENSMUSG00000025279	Dnase1l3	0	0.705027	1.63018	0.570236		ENSMUSG00000029373	Pf4	0	0.789699	1.72871	1
	ENSMUSG00000021701	Plk2	1	2.50169	5.66347	2.02021e-09		ENSMUSG00000106518	Gm42759	1	2.63918	6.22976	1.75627e-05		ENSMUSG00000016526	Dyrk3	0	0.696176	1.6202	0.688754		ENSMUSG00000057278	Snrpg	0	0.785676	1.7239	1
	ENSMUSG00000084106	Gm6136	0	2.45211	5.47215	0.0704779		ENSMUSG00000001506	Col1a1	1	2.6146	6.12455	0.00320071		ENSMUSG00000076583	Igkv8-24	0	0.695688	1.61966	0.664519		ENSMUSG00000076522	Igkv16-104	0	0.784946	1.72303	1
	ENSMUSG00000049357	4933408B17Rik	1	2.44694	5.45259	3.7326e-22		ENSMUSG00000091549	Gm6548	1	2.61231	6.11481	2.93754e-22		ENSMUSG00000056370	Sftpb	0	0.691618	1.61509	0.48715		ENSMUSG00000028417	Tal2	0	0.781333	1.71872	0.747435
	ENSMUSG00000028927	Padi2	1	2.4387	5.42153	4.26636e-16		ENSMUSG00000025889	Snca	1	2.60149	6.06915	1.45997e-07		ENSMUSG00000085337	Gm15964	0	0.678584	1.60057	0.497331		ENSMUSG00000053411	Cbx7	0	0.775499	1.71178	1
	ENSMUSG00000000532	Acvr1b	1	2.43323	5.40102	3.31021e-79		ENSMUSG00000041161	Otud3	1	2.55405	5.87281	6.77297e-30		ENSMUSG00000029648	Flt1	0	0.67789	1.5998	0.637222		ENSMUSG00000097660	Gm26762	0	0.775311	1.71156	1
	ENSMUSG00000076677	Ighv6-3	1	2.42812	5.38191	0.0118418		ENSMUSG00000018102	Hist1h2bc	1	2.52064	5.73836	3.82388e-43		ENSMUSG00000094872	Igkv9-120	0	0.670643	1.59178	0.704203		ENSMUSG00000025089	Gfra1	0	0.770161	1.70546	1
	ENSMUSG00000041025	Iffo2	1	2.41693	5.34032	1.41928e-08		ENSMUSG00000102776	Gm38162	1	2.50503	5.67661	4.70889e-06		ENSMUSG00000009739	Pou6f1	0	0.66487	1.58543	0.595189		ENSMUSG00000094356	Igkv8-28	0	0.769174	1.70429	1
	ENSMUSG00000044533	Rps2	1	2.41115	5.31899	2.5928e-20		ENSMUSG00000075602	Ly6a	1	2.49902	5.653	5.30194e-06		ENSMUSG00000094356	Igkv8-28	0	0.664407	1.58492	0.869975		ENSMUSG00000028459	Cd72	0	0.763818	1.69798	0.391419
	ENSMUSG00000022014	Epsti1	1	2.40922	5.31188	1.79779e-62		ENSMUSG00000069919	Hba-a1	1	2.4966	5.64355	2.31796e-08		ENSMUSG00000084012	Gm11956	0	0.661948	1.58222	0.666808		ENSMUSG00000021356	Irf4	0	0.763169	1.69721	0.693124
	ENSMUSG00000027935	Rab13	1	2.40602	5.30009	2.2896e-13		ENSMUSG00000108633	Gm44694	1	2.49595	5.64099	2.88331e-06		ENSMUSG00000070583	Fv1	0	0.660617	1.58076	0.637658		ENSMUSG00000076556	Igkv4-57	0	0.760438	1.694	1
	ENSMUSG00000045573	Penk	1	2.38545	5.22505	4.0752e-07		ENSMUSG00000026390	Marco	1	2.49223	5.62647	0.00224772		ENSMUSG00000006641	Slc5a6	0	0.658412	1.57834	0.666808		ENSMUSG00000085213	Gm13091	0	0.760158	1.69368	0.788849
	ENSMUSG00000060636	Rpl35a	1	2.36264	5.14311	2.10164e-10		ENSMUSG00000097431	Gm26782	1	2.48353	5.59266	2.12681e-10		ENSMUSG00000076508	Igkv17-127	0	0.655659	1.57534	0.682729		ENSMUSG00000005447	Pafah1b3	0	0.760037	1.69353	0.476863
	ENSMUSG00000053846	Lipg	1	2.29951	4.92292	7.88343e-07		ENSMUSG00000022799	Arhgap31	1	2.48125	5.58383	3.98439e-62		ENSMUSG00000095497	Igkv1-122	0	0.649466	1.56859	0.871334		ENSMUSG00000031586	Rbpms	0	0.757582	1.69066	0.772104
	ENSMUSG00000102776	Gm38162	1	2.29151	4.89569	0.000289712		ENSMUSG00000095079	Igha	1	2.47539	5.56119	1.69534e-11		ENSMUSG00000044566	Cage1	0	0.649358	1.56847	0.495003		ENSMUSG00000068240	Gm11808	0	0.757356	1.69039	0.832017
	ENSMUSG00000089942	Pira2	1	2.29024	4.89136	7.4459e-27		ENSMUSG00000023011	Faim2	1	2.4681	5.53313	2.79074e-06		ENSMUSG00000051339	2900026A02Rik	0	0.646368	1.56522	0.628153		ENSMUSG00000097754	Ptgs2os2	0	0.754248	1.68675	1
	ENSMUSG00000101188	Eif4a-ps4	0	2.2649	4.80621	0.092913		ENSMUSG00000060636	Rpl35a	1	2.45465	5.48181	9.79491e-13		ENSMUSG00000096802	Gm15433	0	0.644453	1.56315	0.550929		ENSMUSG00000094872	Igkv9-120	0	0.752048	1.68418	1
	ENSMUSG00000027514	Zbp1	1	2.26023	4.79067	4.23002e-20		ENSMUSG00000104291	A130071D04Rik	1	2.42666	5.37649	3.09899e-12		ENSMUSG00000015053	Gata2	0	0.642673	1.56122	0.538073		ENSMUSG00000005611	Mrvi1	0	0.751387	1.68341	1
	ENSMUSG00000067341	H2-Eb2	1	2.26003	4.79001	0.00351146		ENSMUSG00000031586	Rbpms	1	2.39841	5.27221	9.95173e-13		ENSMUSG00000111514	E230014E18Rik	0	0.63872	1.55695	0.582693		ENSMUSG00000038298	Pdzk1	0	0.750959	1.68291	1
	ENSMUSG00000058070	Eml1	1	2.22939	4.68935	0.000239915		ENSMUSG00000029417	Cxcl9	1	2.38634	5.22829	8.331e-07		ENSMUSG00000081723	Gm15931	0	0.638542	1.55676	0.588893		ENSMUSG00000086773	Gm16192	0	0.749504	1.68122	1
	ENSMUSG00000054072	Iigp1	1	2.20604	4.61407	4.68019e-06		ENSMUSG00000027313	Chac1	1	2.37458	5.18584	1.26421e-18		ENSMUSG00000052794	1700030K09Rik	0	0.635743	1.55374	0.59377		ENSMUSG00000074364	Ehd2	0	0.74875	1.68034	0.891009
	ENSMUSG00000020553	Pctp	1	2.20477	4.61002	8.52464e-19		ENSMUSG00000038298	Pdzk1	1	2.37342	5.18168	1.08354e-07		ENSMUSG00000025555	Farp1	0	0.635522	1.5535	0.354229		ENSMUSG00000098178	Gm42418	1	0.746463	1.67768	0.0180697
	ENSMUSG00000037820	Tgm2	1	2.18038	4.53274	1.57724e-18		ENSMUSG00000069917	Hba-a2	1	2.36438	5.14933	0.000243344		ENSMUSG00000041115	Iqsec2	0	0.634109	1.55198	0.447011		ENSMUSG00000063171	Rps4l	0	0.746054	1.6772	0.876769
	ENSMUSG00000058427	Cxcl2	1	2.17152	4.50498	4.87681e-13		ENSMUSG00000044533	Rps2	1	2.34227	5.07098	4.49038e-22		ENSMUSG00000041992	Rapgef5	0	0.633731	1.55157	0.588349		ENSMUSG00000000320	Alox12	0	0.745946	1.67707	1
	ENSMUSG00000106518	Gm42759	1	2.16369	4.4806	0.00170024		ENSMUSG00000076677	Ighv6-3	1	2.32757	5.01958	0.00890866		ENSMUSG00000020424	Castor1	0	0.630348	1.54794	0.582693		ENSMUSG00000086765	Gm11827	0	0.743306	1.67401	0.627346
	ENSMUSG00000103094	Gm37558	0	2.15036	4.4394	0.0530107		ENSMUSG00000078502	Gm13212	1	2.29604	4.91109	6.89632e-08		ENSMUSG00000047193	Dync2h1	0	0.629171	1.54668	0.557972		ENSMUSG00000023966	Rsph9	0	0.743286	1.67398	1
	ENSMUSG00000045502	Hcar2	1	2.13039	4.37834	1.10267e-13		ENSMUSG00000020785	Camkk1	1	2.29091	4.89364	1.05516e-07		ENSMUSG00000039987	Phtf2	0	0.625673	1.54293	0.583317		ENSMUSG00000076937	Iglc2	0	0.738358	1.66828	0.772104
	ENSMUSG00000041608	Entpd3	1	2.10891	4.31365	9.95365e-05		ENSMUSG00000037820	Tgm2	1	2.28923	4.88794	5.31234e-23		ENSMUSG00000079164	Tlr5	0	0.623564	1.54068	0.222057		ENSMUSG00000015568	Lpl	0	0.733502	1.66267	0.39368
	ENSMUSG00000020010	Vnn3	1	2.10087	4.28968	9.37128e-20		ENSMUSG00000052605	Isoc2b	1	2.27268	4.83218	5.45028e-05		ENSMUSG00000026944	Abca2	1	0.621879	1.53888	0.011153		ENSMUSG00000058056	Palld	0	0.730142	1.6588	1
	ENSMUSG00000019990	Pde7b	1	2.09154	4.26203	7.88903e-05		ENSMUSG00000013936	Myl2	1	2.26337	4.80112	3.96301e-11		ENSMUSG00000094088	Ighv1-64	0	0.618957	1.53576	0.488183		ENSMUSG00000076555	Igkv4-57-1	0	0.727296	1.65553	1
	ENSMUSG00000105504	Gbp5	1	2.07935	4.22616	0.00069678		ENSMUSG00000041608	Entpd3	1	2.2374	4.71547	2.96539e-06		ENSMUSG00000032420	Nt5e	0	0.617256	1.53395	0.156349		ENSMUSG00000087477	Gm13822	0	0.72685	1.65502	0.811886
	ENSMUSG00000040263	Klhdc4	1	2.05932	4.16789	1.29484e-43		ENSMUSG00000073940	Hbb-bt	1	2.2341	4.70468	2.91857e-06		ENSMUSG00000018698	Lhx1	0	0.616479	1.53313	0.403954		ENSMUSG00000017978	Cadps2	0	0.724917	1.65281	0.743167
	ENSMUSG00000018102	Hist1h2bc	1	2.01417	4.03949	1.33703e-25		ENSMUSG00000032135	Mcam	1	2.23257	4.69969	1.37513e-13		ENSMUSG00000021466	Ptch1	0	0.615903	1.53252	0.666808		ENSMUSG00000027863	Cd2	0	0.723428	1.6511	1
	ENSMUSG00000044229	Nxpe4	1	1.98143	3.94885	0.0374554		ENSMUSG00000118140	AC134576.3	1	2.22014	4.65939	3.37189e-07		ENSMUSG00000112336	Gm47766	0	0.614911	1.53146	0.658313		ENSMUSG00000035337	Uchl4	0	0.719703	1.64684	1
	ENSMUSG00000034377	Tulp4	1	1.9596	3.88954	2.6691e-07		ENSMUSG00000053318	Slamf8	1	2.21775	4.65167	9.98135e-08		ENSMUSG00000026220	Slc16a14	0	0.613242	1.52969	0.486942		ENSMUSG00000030742	Lat	0	0.718408	1.64537	0.811886
	ENSMUSG00000052605	Isoc2b	1	1.95272	3.87104	0.00160533		ENSMUSG00000026536	Ifi211	1	2.19041	4.56434	6.17699e-09		ENSMUSG00000094117	Igkv3-12	0	0.612721	1.52914	0.816662		ENSMUSG00000041633	Kctd12b	0	0.715217	1.64173	1
	ENSMUSG00000054589	Gm9949	1	1.94629	3.85381	5.07445e-13		ENSMUSG00000035133	Arhgap5	1	2.1739	4.51241	2.7543e-12		ENSMUSG00000026707	Nsun6	0	0.610798	1.5271	0.410988		ENSMUSG00000092212	Slc22a13b-ps	0	0.715128	1.64163	0.772104
	ENSMUSG00000073492	Gm10521	1	1.93713	3.82943	3.62221e-07		ENSMUSG00000046727	Cystm1	1	2.16812	4.49436	1.08688e-11		ENSMUSG00000016356	Col20a1	0	0.61074	1.52704	0.642244		ENSMUSG00000076431	Sox4	0	0.703264	1.62818	0.907317
	ENSMUSG00000053338	Tarm1	1	1.93274	3.81779	1.81365e-21		ENSMUSG00000021701	Plk2	1	2.16736	4.492	1.431e-08		ENSMUSG00000071489	Ptgdr	0	0.610678	1.52698	0.582693		ENSMUSG00000045193	Cirbp	0	0.698451	1.62276	1
	ENSMUSG00000025059	Gk	1	1.92354	3.79353	1.17033e-32		ENSMUSG00000024812	Tjp2	1	2.14874	4.4344	1.8005e-06		ENSMUSG00000049858	Suox	0	0.610168	1.52644	0.486641		ENSMUSG00000025279	Dnase1l3	0	0.696661	1.62075	1
	ENSMUSG00000091509	Gm17066	1	1.8964	3.72283	0.00111275		ENSMUSG00000018930	Ccl4	1	2.14588	4.42562	1.8005e-06		ENSMUSG00000044134	Pheta1	0	0.607655	1.52378	0.615364		ENSMUSG00000073468	Sft2d1	0	0.696201	1.62023	0.627346
	ENSMUSG00000022584	Ly6c2	1	1.88773	3.70052	3.77965e-31		ENSMUSG00000029299	Abcg3	1	2.12888	4.37378	3.21731e-19		ENSMUSG00000020601	Trib2	0	0.602041	1.51786	0.674081		ENSMUSG00000024521	Pmaip1	0	0.69195	1.61547	0.409728
	ENSMUSG00000024121	Atp6v0c	1	1.88699	3.69863	2.44292e-46		ENSMUSG00000058427	Cxcl2	1	2.12558	4.3638	3.0283e-13		ENSMUSG00000052861	Dnah6	0	0.59946	1.51515	0.366536		ENSMUSG00000076614	Ighg1	0	0.690477	1.61382	1
	ENSMUSG00000047557	Lxn	1	1.87918	3.67866	9.29137e-20		ENSMUSG00000022126	Acod1	1	2.12293	4.35577	1.11332e-11		ENSMUSG00000022131	Gpr180	0	0.594151	1.50958	0.727014		ENSMUSG00000082127	Gm13577	0	0.689506	1.61273	0.772104
	ENSMUSG00000109429	Gm45223	1	1.87861	3.67721	0.0218069		ENSMUSG00000079339	Ifit1bl1	1	2.11318	4.32643	4.19087e-08		ENSMUSG00000039713	Plekhg5	0	0.593007	1.50839	0.664519		ENSMUSG00000049526	Tmem202	0	0.688041	1.61109	0.72435
	ENSMUSG00000049653	Spatc1	1	1.87689	3.67283	0.00145147		ENSMUSG00000024330	Col11a2	1	2.10596	4.30484	1.03454e-06		ENSMUSG00000060301	2610008E11Rik	0	0.590679	1.50596	0.548708		ENSMUSG00000033427	Upb1	0	0.68246	1.60487	1
	ENSMUSG00000046727	Cystm1	1	1.87391	3.66525	4.76094e-08		ENSMUSG00000049653	Spatc1	1	2.10234	4.29406	8.5797e-05		ENSMUSG00000078920	Ifi47	0	0.590638	1.50591	0.227052		ENSMUSG00000004044	Cavin1	0	0.680598	1.6028	1
	ENSMUSG00000066861	Oas1g	1	1.87194	3.66025	1.41629e-06		ENSMUSG00000096108	Ighv11-2	1	2.10192	4.2928	1.40196e-05		ENSMUSG00000005802	Slc30a4	0	0.589869	1.50511	0.674081		ENSMUSG00000040722	Scamp5	0	0.680473	1.60266	1
	ENSMUSG00000024570	Rbfa	1	1.8696	3.65432	3.25623e-43		ENSMUSG00000020010	Vnn3	1	2.09249	4.26484	1.24533e-21		ENSMUSG00000048696	Mex3d	0	0.588569	1.50375	0.605312		ENSMUSG00000038776	Ephx1	0	0.678795	1.6008	0.772104
	ENSMUSG00000045087	S1pr5	1	1.8463	3.59578	0.000178069		ENSMUSG00000025092	Hspa12a	1	2.08163	4.23286	0.000242136		ENSMUSG00000074259	Gramd2	0	0.588524	1.50371	0.477065		ENSMUSG00000042351	Grap2	0	0.677048	1.59886	1
	ENSMUSG00000095079	Igha	1	1.84533	3.59334	3.95409e-06		ENSMUSG00000000532	Acvr1b	1	2.06816	4.19352	3.53632e-67		ENSMUSG00000039853	Trim14	0	0.588405	1.50358	0.308345		ENSMUSG00000113101	Gm33424	0	0.674651	1.59621	0.653525
	ENSMUSG00000055652	Klhl25	1	1.84379	3.58951	4.00042e-18		ENSMUSG00000054589	Gm9949	1	2.06684	4.18969	2.95177e-16		ENSMUSG00000068114	Ccdc134	0	0.588276	1.50345	0.585768		ENSMUSG00000034833	Tespa1	0	0.673238	1.59465	1
	ENSMUSG00000020407	Upp1	1	1.81455	3.51749	1.2053e-14		ENSMUSG00000025058	5430427O19Rik	1	2.06558	4.18602	1.6167e-20		ENSMUSG00000020389	Cdkl3	0	0.587334	1.50247	0.570236		ENSMUSG00000094797	Igkv6-15	0	0.672997	1.59438	1
	ENSMUSG00000032841	Prr5l	1	1.81106	3.509	1.48085e-08		ENSMUSG00000052305	Hbb-bs	1	2.06499	4.1843	6.2872e-05		ENSMUSG00000050075	Gpr171	0	0.586213	1.5013	0.659654		ENSMUSG00000030313	Dennd5b	0	0.670118	1.5912	0.951014
	ENSMUSG00000020641	Rsad2	1	1.80697	3.49906	1.57521e-10		ENSMUSG00000032841	Prr5l	1	2.05808	4.16432	5.84398e-12		ENSMUSG00000024897	Apba1	0	0.58305	1.49801	0.783227		ENSMUSG00000024769	Cdc42bpg	0	0.667833	1.58868	0.116324
	ENSMUSG00000009585	Apobec3	1	1.80683	3.49873	1.00361e-28		ENSMUSG00000067203	H2-K2	1	2.05256	4.14842	0.000157523		ENSMUSG00000046748	Tmem45a2	0	0.582337	1.49727	0.269312		ENSMUSG00000001930	Vwf	0	0.667553	1.58838	1
	ENSMUSG00000043873	Chil5	1	1.80683	3.49872	1.26508e-19		ENSMUSG00000092305	Prps1l1	1	2.04954	4.13975	1.06411e-07		ENSMUSG00000011267	Zfp296	0	0.574438	1.4891	0.417829		ENSMUSG00000097142	Gm26778	0	0.667508	1.58833	1
	ENSMUSG00000034459	Ifit1	1	1.80179	3.48652	9.51406e-09		ENSMUSG00000048442	Smim5	1	2.0306	4.08573	3.15745e-35		ENSMUSG00000070304	Scn2b	0	0.571474	1.48604	0.543601		ENSMUSG00000020593	Lpin1	0	0.666537	1.58726	0.476863
	ENSMUSG00000060591	Ifitm2	1	1.79814	3.47772	3.72122e-28		ENSMUSG00000040263	Klhdc4	1	2.00479	4.01329	1.06258e-46		ENSMUSG00000034764	1700006J14Rik	0	0.570653	1.4852	0.447011		ENSMUSG00000086296	D030055H07Rik	0	0.665257	1.58585	1
	ENSMUSG00000024330	Col11a2	1	1.79753	3.47625	9.72016e-05		ENSMUSG00000020641	Rsad2	1	1.99463	3.98514	4.78216e-14		ENSMUSG00000050550	Gm11868	0	0.568736	1.48322	0.561797		ENSMUSG00000086894	Gm15708	0	0.661006	1.58119	0.788849
	ENSMUSG00000032739	Pram1	1	1.78017	3.43466	2.36131e-06		ENSMUSG00000003038	Hmgn2	1	1.94998	3.86369	4.23832e-15		ENSMUSG00000038217	Tlcd2	0	0.565263	1.47966	0.613369		ENSMUSG00000076536	Igkv4-86	0	0.658294	1.57822	1
	ENSMUSG00000006345	Ggt1	1	1.77499	3.42236	2.10856e-09		ENSMUSG00000073468	Sft2d1	1	1.93631	3.82726	8.60359e-11		ENSMUSG00000040522	Tlr8	0	0.563432	1.47778	0.316444		ENSMUSG00000031494	Cd209a	0	0.657486	1.57733	1
	ENSMUSG00000000957	Mmp14	1	1.77459	3.4214	0.00279192		ENSMUSG00000003545	Fosb	1	1.93186	3.81547	1.18144e-17		ENSMUSG00000108268	Gm44187	0	0.5633	1.47765	0.604159		ENSMUSG00000021384	Susd3	0	0.656969	1.57677	0.536215
	ENSMUSG00000031494	Cd209a	1	1.7543	3.37364	0.000470965		ENSMUSG00000069792	Wfdc17	1	1.93058	3.81209	1.18295e-14		ENSMUSG00000102975	Gm37347	0	0.56329	1.47764	0.695543		ENSMUSG00000102153	Gm37474	0	0.655809	1.5755	1
	ENSMUSG00000015980	Lrrc27	1	1.74633	3.35503	3.2072e-07		ENSMUSG00000024570	Rbfa	1	1.92694	3.80249	5.87042e-51		ENSMUSG00000052234	Epx	0	0.560307	1.47458	0.596081		ENSMUSG00000107411	Gm19040	0	0.654849	1.57445	1
	ENSMUSG00000025058	5430427O19Rik	1	1.74632	3.35501	2.42552e-13		ENSMUSG00000060586	H2-Eb1	1	1.91562	3.77277	2.22449e-14		ENSMUSG00000032278	Paqr5	0	0.559048	1.4733	0.573337		ENSMUSG00000067017	Gm3608	0	0.652386	1.57177	1
	ENSMUSG00000008348	Ubc	1	1.74375	3.34905	4.88904e-20		ENSMUSG00000074733	Zfp950	1	1.91079	3.76014	6.76386e-07		ENSMUSG00000062345	Serpinb2	0	0.556784	1.47099	0.664454		ENSMUSG00000076543	Igkv4-74	0	0.651056	1.57032	1
	ENSMUSG00000048442	Smim5	1	1.73972	3.3397	3.08716e-24		ENSMUSG00000000957	Mmp14	1	1.90993	3.75791	0.00049618		ENSMUSG00000022748	Cmss1	0	0.555274	1.46945	0.595189		ENSMUSG00000053310	Nrgn	0	0.646422	1.56528	0.905575
	ENSMUSG00000030851	Ldhc	1	1.73951	3.33923	0.000291684		ENSMUSG00000097352	C920009B18Rik	1	1.90347	3.74113	2.82137e-05		ENSMUSG00000089931	Gm8459	0	0.553082	1.46722	0.67009		ENSMUSG00000023031	Cela1	0	0.642296	1.56081	1
	ENSMUSG00000117485	AC132455.2	1	1.72685	3.31003	6.95008e-07		ENSMUSG00000025402	Nab2	1	1.8998	3.73162	4.46452e-06		ENSMUSG00000022425	Enpp2	0	0.552689	1.46682	0.658245		ENSMUSG00000101316	Gm12663	0	0.640805	1.5592	1
	ENSMUSG00000026073	Il1r2	1	1.72355	3.30248	8.41608e-19		ENSMUSG00000054072	Iigp1	1	1.89098	3.70887	0.000153653		ENSMUSG00000033706	Smyd5	0	0.552259	1.46638	0.44096		ENSMUSG00000029650	Slc46a3	0	0.640754	1.55914	0.583518
	ENSMUSG00000041831	Sytl3	1	1.7212	3.2971	0.000104073		ENSMUSG00000045502	Hcar2	1	1.88274	3.68774	3.30528e-12		ENSMUSG00000038418	Egr1	0	0.550074	1.46416	0.570236		ENSMUSG00000021250	Fos	0	0.638905	1.55715	0.246942
	ENSMUSG00000056144	Trim34a	1	1.71693	3.28736	9.04361e-12		ENSMUSG00000063171	Rps4l	1	1.88	3.68075	1.24184e-06		ENSMUSG00000032307	Ube2q2	0	0.548244	1.46231	0.466591		ENSMUSG00000024340	Btnl2	0	0.635116	1.55306	1
	ENSMUSG00000094797	Igkv6-15	0	1.70482	3.25988	0.0502206		ENSMUSG00000024672	Ms4a7	1	1.87863	3.67726	5.08131e-07		ENSMUSG00000045092	S1pr1	0	0.548102	1.46216	0.536603		ENSMUSG00000108954	Gm44901	0	0.63496	1.55289	1
	ENSMUSG00000033488	Cryzl2	1	1.70373	3.25742	2.20537e-11		ENSMUSG00000020553	Pctp	1	1.85444	3.61612	3.58676e-15		ENSMUSG00000033256	Shf	0	0.546173	1.46021	0.677756		ENSMUSG00000089849	Runx2os2	0	0.633792	1.55164	1
	ENSMUSG00000102153	Gm37474	1	1.69599	3.24	0.0482325		ENSMUSG00000056144	Trim34a	1	1.84486	3.59218	1.09197e-14		ENSMUSG00000026170	Cyp27a1	0	0.545178	1.4592	0.605316		ENSMUSG00000059970	Hspa2	0	0.632587	1.55034	0.772104
	ENSMUSG00000033287	Kctd17	1	1.6874	3.22077	0.000926083		ENSMUSG00000113669	Gm36723	1	1.83893	3.57745	3.04473e-08		ENSMUSG00000068959	Zfp619	0	0.544912	1.45893	0.674172		ENSMUSG00000038179	Slamf7	0	0.629357	1.54688	0.772104
	ENSMUSG00000023022	Lima1	1	1.68375	3.21262	7.27746e-33		ENSMUSG00000022584	Ly6c2	1	1.83662	3.57173	4.44383e-33		ENSMUSG00000048142	Nat8l	0	0.544544	1.45856	0.254328		ENSMUSG00000076677	Ighv6-3	0	0.629223	1.54673	1
	ENSMUSG00000031791	Tmem38a	1	1.67593	3.19524	2.58552e-14		ENSMUSG00000034459	Ifit1	1	1.80297	3.48937	1.09166e-09		ENSMUSG00000036885	Arhgef26	0	0.544401	1.45841	0.561909		ENSMUSG00000057098	Ebf1	0	0.628604	1.54607	1
	ENSMUSG00000113669	Gm36723	1	1.67537	3.19402	1.99622e-06		ENSMUSG00000020681	Ace	1	1.80077	3.48407	2.88984e-11		ENSMUSG00000028037	Ifi44	0	0.543274	1.45728	0.682102		ENSMUSG00000030724	Cd19	0	0.626582	1.5439	0.907317
	ENSMUSG00000073411	H2-D1	1	1.66185	3.16422	9.2707e-22		ENSMUSG00000058070	Eml1	1	1.79286	3.46501	0.00183422		ENSMUSG00000090137	Uba52	0	0.542675	1.45667	0.674081		ENSMUSG00000056185	Snx32	0	0.625705	1.54297	1
	ENSMUSG00000043263	Ifi209	1	1.65982	3.15978	3.23067e-11		ENSMUSG00000073421	H2-Ab1	1	1.79169	3.46219	3.26636e-12		ENSMUSG00000025092	Hspa12a	0	0.542058	1.45605	0.735161		ENSMUSG00000021203	Otub2	0	0.625477	1.54272	1
	ENSMUSG00000095630	Igkv6-23	1	1.65681	3.15318	0.00242992		ENSMUSG00000092074	Dynlt1a	1	1.79136	3.46141	0.0321137		ENSMUSG00000034171	Faah	0	0.541905	1.45589	0.573337		ENSMUSG00000027401	Tgm3	0	0.624045	1.54119	0.854566
	ENSMUSG00000031861	Lpar2	1	1.6568	3.15317	1.99164e-07		ENSMUSG00000108291	Gm44292	1	1.78428	3.44446	2.64453e-06		ENSMUSG00000040620	Dhx33	0	0.541585	1.45557	0.649155		ENSMUSG00000015314	Slamf6	0	0.623971	1.54111	0.95757
	ENSMUSG00000031698	Mylk3	1	1.65259	3.14398	0.00497693		ENSMUSG00000024121	Atp6v0c	1	1.7828	3.44094	2.11197e-46		ENSMUSG00000052942	Glis3	0	0.539086	1.45305	0.647691		ENSMUSG00000004383	Large1	0	0.622205	1.53923	1
	ENSMUSG00000022555	Dgat1	1	1.6516	3.14181	2.82334e-30		ENSMUSG00000079065	BC005561	1	1.78275	3.44082	7.63459e-05		ENSMUSG00000041477	Dcp1b	0	0.537183	1.45114	0.620216		ENSMUSG00000038587	Akap12	0	0.621508	1.53848	1
	ENSMUSG00000092305	Prps1l1	1	1.64965	3.13757	5.84715e-05		ENSMUSG00000031861	Lpar2	1	1.7769	3.42689	5.32651e-09		ENSMUSG00000029190	D5Ertd579e	0	0.536943	1.45089	0.28243		ENSMUSG00000024597	Slc12a2	0	0.621296	1.53826	1
	ENSMUSG00000031586	Rbpms	1	1.64025	3.1172	3.4142e-06		ENSMUSG00000025270	Alas2	1	1.76979	3.41005	0.00130274		ENSMUSG00000041481	Serpina3g	0	0.536622	1.45057	0.613369		ENSMUSG00000069515	Lyz1	0	0.620606	1.53752	0.907317
	ENSMUSG00000031709	Tbc1d9	1	1.63847	3.11336	2.1112e-05		ENSMUSG00000031791	Tmem38a	1	1.76859	3.40721	2.57583e-17		ENSMUSG00000076586	Igkv8-21	0	0.534977	1.44892	0.845551		ENSMUSG00000056267	Cep70	0	0.620411	1.53731	0.85761
	ENSMUSG00000030703	Gdpd3	1	1.63387	3.10345	1.93525e-13		ENSMUSG00000053411	Cbx7	1	1.76596	3.401	7.23297e-05		ENSMUSG00000021203	Otub2	0	0.53431	1.44825	0.697289		ENSMUSG00000032220	Myo1e	0	0.619657	1.53651	1
	ENSMUSG00000031613	Hpgd	1	1.60064	3.03278	3.67507e-06		ENSMUSG00000087497	2810001G20Rik	1	1.75856	3.38361	5.62201e-07		ENSMUSG00000029298	Gbp9	0	0.529819	1.44375	0.439147		ENSMUSG00000028927	Padi2	0	0.618887	1.53569	0.772104
	ENSMUSG00000032872	Cyb5r4	1	1.59982	3.03106	4.44325e-45		ENSMUSG00000052336	Cx3cr1	1	1.7526	3.36965	5.38765e-15		ENSMUSG00000090665	Gad1-ps	0	0.526716	1.44065	0.202235		ENSMUSG00000048058	Ldlrad3	0	0.618208	1.53497	1
	ENSMUSG00000021322	Aoah	1	1.5995	3.03038	4.17357e-25		ENSMUSG00000101585	1600010M07Rik	1	1.7496	3.36265	1.52984e-07		ENSMUSG00000027243	Harbi1	0	0.526544	1.44047	0.573337		ENSMUSG00000018930	Ccl4	0	0.618164	1.53492	1
	ENSMUSG00000025402	Nab2	1	1.59486	3.02066	0.000399971		ENSMUSG00000097754	Ptgs2os2	1	1.74853	3.36015	4.93749e-05		ENSMUSG00000027487	Cdk5rap1	0	0.526182	1.44011	0.538073		ENSMUSG00000062345	Serpinb2	0	0.615549	1.53214	1
	ENSMUSG00000037771	Slc32a1	1	1.59364	3.01809	0.000580603		ENSMUSG00000011263	Exoc3l2	1	1.74516	3.35232	5.93539e-05		ENSMUSG00000034930	Rtkn	0	0.523102	1.43704	0.698265		ENSMUSG00000018593	Sparc	0	0.613298	1.52975	1
	ENSMUSG00000060260	Pwwp2b	1	1.59211	3.0149	3.82434e-09		ENSMUSG00000009585	Apobec3	1	1.74191	3.34479	7.12848e-30		ENSMUSG00000084106	Gm6136	0	0.522496	1.43644	0.899183		ENSMUSG00000055546	Timd4	0	0.605333	1.52133	1
	ENSMUSG00000038298	Pdzk1	1	1.58714	3.00453	0.00111341		ENSMUSG00000063406	Tmed5	1	1.73875	3.33746	1.43454e-51		ENSMUSG00000032135	Mcam	0	0.521776	1.43572	0.558444		ENSMUSG00000048376	F2r	0	0.60311	1.51899	1
	ENSMUSG00000037847	Nmrk1	1	1.58093	2.99163	1.52509e-06		ENSMUSG00000073411	H2-D1	1	1.72774	3.31208	6.21164e-26		ENSMUSG00000034285	Nipsnap1	0	0.521273	1.43522	0.666808		ENSMUSG00000043243	Fam129c	0	0.603044	1.51892	1
	ENSMUSG00000029299	Abcg3	1	1.57751	2.98454	5.88296e-10		ENSMUSG00000042595	Fam199x	1	1.72028	3.295	0.000862657		ENSMUSG00000042275	Pelo	0	0.520707	1.43466	0.582693		ENSMUSG00000022240	Ctnnd2	0	0.60223	1.51806	1
	ENSMUSG00000062488	Ifit3b	1	1.57491	2.97917	0.000185247		ENSMUSG00000034353	Ramp1	1	1.71158	3.27519	1.05323e-10		ENSMUSG00000049553	Polr1a	0	0.519963	1.43392	0.0699263		ENSMUSG00000045005	Fzd5	0	0.601932	1.51775	1
	ENSMUSG00000063406	Tmed5	1	1.56971	2.96845	4.18821e-38		ENSMUSG00000020599	Rgs9	1	1.70928	3.26997	8.81203e-06		ENSMUSG00000025316	Banp	0	0.519386	1.43335	0.415463		ENSMUSG00000026185	Igfbp5	0	0.60082	1.51658	1
	ENSMUSG00000109274	Gm45133	1	1.56956	2.96813	0.000895347		ENSMUSG00000008348	Ubc	1	1.69217	3.23143	5.91856e-21		ENSMUSG00000021356	Irf4	0	0.51861	1.43257	0.611074		ENSMUSG00000045092	S1pr1	0	0.599186	1.51486	0.861813
	ENSMUSG00000030144	Clec4d	1	1.55511	2.93856	4.69398e-08		ENSMUSG00000023034	Nr4a1	1	1.68026	3.20487	1.24814e-13		ENSMUSG00000032773	Chrm1	0	0.518457	1.43242	0.570236		ENSMUSG00000072919	Noxred1	0	0.598934	1.5146	1
	ENSMUSG00000053332	Gas5	1	1.55292	2.93411	1.43008e-08		ENSMUSG00000009076	Zmat5	1	1.67722	3.19811	1.00234e-16		ENSMUSG00000021028	Mbip	0	0.515957	1.42994	0.582693		ENSMUSG00000000409	Lck	0	0.598358	1.51399	1
	ENSMUSG00000013936	Myl2	1	1.55057	2.92933	2.81375e-05		ENSMUSG00000030703	Gdpd3	1	1.67491	3.193	5.19825e-15		ENSMUSG00000112722	Gm3942	0	0.515859	1.42984	0.40929		ENSMUSG00000103009	Gm4430	0	0.597955	1.51357	1
	ENSMUSG00000092341	Malat1	1	1.54604	2.92015	0.00711382		ENSMUSG00000048498	Cd300e	1	1.66948	3.181	0.000741673		ENSMUSG00000028082	Sh3d19	0	0.51276	1.42678	0.613369		ENSMUSG00000061186	Sfmbt2	0	0.596634	1.51218	0.403077
	ENSMUSG00000082292	Gm12250	1	1.546	2.92006	8.72944e-06		ENSMUSG00000022555	Dgat1	1	1.66809	3.17793	4.20556e-34		ENSMUSG00000019866	Crybg1	1	0.51232	1.42634	0.0305198		ENSMUSG00000033752	Mnd1	0	0.59629	1.51182	1
	ENSMUSG00000060512	0610040J01Rik	1	1.54035	2.90865	0.00181904		ENSMUSG00000042401	Crtac1	1	1.66311	3.16699	3.00444e-11		ENSMUSG00000037007	Zfp113	0	0.510554	1.4246	0.657711		ENSMUSG00000031078	Cttn	0	0.595026	1.5105	1
	ENSMUSG00000029417	Cxcl9	1	1.53234	2.89254	0.00245732		ENSMUSG00000102975	Gm37347	1	1.66268	3.16604	0.00113633		ENSMUSG00000038967	Pdk2	0	0.50953	1.42359	0.602051		ENSMUSG00000046341	Gm11223	0	0.594456	1.5099	1
	ENSMUSG00000109675	Nxpe1-ps	1	1.51694	2.86183	0.000358829		ENSMUSG00000031584	Gsr	1	1.66083	3.16199	1.49833e-25		ENSMUSG00000027401	Tgm3	0	0.508757	1.42282	0.588812		ENSMUSG00000046668	Cxxc5	0	0.593621	1.50903	1
	ENSMUSG00000069206	Zfp874a	1	1.51673	2.86142	0.000105597		ENSMUSG00000059277	R74862	1	1.65933	3.1587	1.63349e-05		ENSMUSG00000020183	Cpm	0	0.508429	1.4225	0.679377		ENSMUSG00000054641	Mmrn1	0	0.593336	1.50873	1
	ENSMUSG00000042616	Oscp1	1	1.50218	2.8327	5.38535e-11		ENSMUSG00000026580	Selp	1	1.65642	3.15232	1.25416e-05		ENSMUSG00000042870	Tom1	0	0.508201	1.42228	0.250661		ENSMUSG00000061132	Blnk	0	0.593236	1.50863	0.820741
	ENSMUSG00000042401	Crtac1	1	1.4991	2.82667	1.21731e-08		ENSMUSG00000082820	Gm13803	1	1.65627	3.15201	0.0344448		ENSMUSG00000094335	Igkv1-117	0	0.506376	1.42048	0.604159		ENSMUSG00000029919	Hpgds	0	0.593217	1.50861	1
	ENSMUSG00000027360	Hdc	1	1.49829	2.82507	2.7858e-19		ENSMUSG00000032872	Cyb5r4	1	1.65232	3.14339	7.82955e-53		ENSMUSG00000037096	Gm9762	0	0.505958	1.42007	0.838427		ENSMUSG00000116927	Gm30881	0	0.59234	1.50769	1
	ENSMUSG00000032661	Oas3	1	1.49306	2.81486	4.26696e-07		ENSMUSG00000046721	Rpl14-ps1	0	1.64808	3.13416	0.0602952		ENSMUSG00000023132	Gzma	0	0.505805	1.41992	0.733746		ENSMUSG00000027368	Dusp2	0	0.591273	1.50658	1
	ENSMUSG00000048498	Cd300e	1	1.49271	2.81418	0.00626202		ENSMUSG00000030149	Klrk1	1	1.6435	3.12423	0.000706148		ENSMUSG00000021285	Ppp1r13b	0	0.50294	1.4171	0.550929		ENSMUSG00000057132	Rpgrip1	0	0.590618	1.50589	1
	ENSMUSG00000073490	Ifi207	1	1.48809	2.80517	1.80892e-06		ENSMUSG00000066861	Oas1g	1	1.63797	3.11227	1.11345e-05		ENSMUSG00000071041	Impdh2-ps	0	0.50258	1.41675	0.902781		ENSMUSG00000040724	Kcna2	0	0.589622	1.50485	1
	ENSMUSG00000100465	Gm29264	1	1.48397	2.79718	0.00111894		ENSMUSG00000016496	Cd274	1	1.62593	3.08641	1.23522e-06		ENSMUSG00000027259	Adal	0	0.501606	1.41579	0.778174		ENSMUSG00000014030	Pax5	0	0.588208	1.50338	1
	ENSMUSG00000025036	Sfxn2	1	1.47992	2.78934	3.69449e-11		ENSMUSG00000047557	Lxn	1	1.62553	3.08555	6.25388e-17		ENSMUSG00000009569	Mrtfb	0	0.501152	1.41534	0.570236		ENSMUSG00000035202	Lars2	0	0.587873	1.50303	0.0697212
	ENSMUSG00000079339	Ifit1bl1	1	1.47518	2.78019	0.00041449		ENSMUSG00000067613	Krt83	1	1.62201	3.07804	2.63591e-10		ENSMUSG00000067614	Krt86	0	0.501059	1.41525	0.447011		ENSMUSG00000107896	Gm8719	0	0.587421	1.50256	1
	ENSMUSG00000059305	Vpreb1	1	1.46078	2.75257	0.00295802		ENSMUSG00000089942	Pira2	1	1.61091	3.05443	1.27826e-15		ENSMUSG00000028630	Dyrk2	0	0.500005	1.41422	0.527161		ENSMUSG00000020424	Castor1	0	0.586647	1.50175	1
	ENSMUSG00000067613	Krt83	1	1.4583	2.74785	9.36271e-08		ENSMUSG00000053338	Tarm1	1	1.61031	3.05318	5.76826e-17		ENSMUSG00000021476	Habp4	0	0.499093	1.41332	0.57564		ENSMUSG00000059277	R74862	0	0.583498	1.49848	1
	ENSMUSG00000034681	Rnps1	1	1.45435	2.74033	5.03379e-16		ENSMUSG00000107624	Gm44005	1	1.60181	3.03524	5.93539e-05		ENSMUSG00000001288	Rarg	0	0.498839	1.41308	0.222057		ENSMUSG00000029587	Zfp12	0	0.579002	1.49382	1
	ENSMUSG00000001630	Stk38l	1	1.44664	2.72573	3.43261e-07		ENSMUSG00000040724	Kcna2	1	1.60069	3.03289	0.000103966		ENSMUSG00000004098	Col5a3	0	0.49861	1.41285	0.610256		ENSMUSG00000040270	Bach2	0	0.578099	1.49288	1
	ENSMUSG00000044788	Fads6	1	1.44559	2.72374	6.28845e-06		ENSMUSG00000041831	Sytl3	1	1.59919	3.02972	0.000158485		ENSMUSG00000032598	Nckipsd	0	0.498248	1.4125	0.674172		ENSMUSG00000048264	Dip2c	0	0.577879	1.49265	1
	ENSMUSG00000032690	Oas2	1	1.43898	2.71129	8.89832e-05		ENSMUSG00000015474	Ppt2	1	1.59594	3.02291	1.07382e-14		ENSMUSG00000042569	Dhrs7b	0	0.497683	1.41194	0.443391		ENSMUSG00000041797	Abca9	0	0.577822	1.49259	0.604247
	ENSMUSG00000031584	Gsr	1	1.43798	2.70941	1.00914e-17		ENSMUSG00000024597	Slc12a2	1	1.59469	3.0203	0.000298708		ENSMUSG00000021904	Sema3g	0	0.495057	1.40938	0.67009		ENSMUSG00000025880	Smad7	0	0.577367	1.49212	1
	ENSMUSG00000094090	Gm8494	0	1.42912	2.69282	0.473437		ENSMUSG00000034681	Rnps1	1	1.59092	3.01242	1.2204e-20		ENSMUSG00000056399	Prss34	0	0.494856	1.40918	0.548708		ENSMUSG00000028037	Ifi44	0	0.576114	1.49083	1
	ENSMUSG00000073418	C4b	0	1.429	2.6926	0.0664931		ENSMUSG00000038811	Gngt2	1	1.59049	3.01152	3.4194e-13		ENSMUSG00000089809	Rasgef1b	0	0.494794	1.40912	0.680691		ENSMUSG00000029561	Oasl2	0	0.57395	1.48859	0.951014
	ENSMUSG00000032556	Bfsp2	1	1.42603	2.68706	0.00803087		ENSMUSG00000034377	Tulp4	1	1.58419	2.99838	1.17796e-05		ENSMUSG00000048807	Slc35e4	0	0.494097	1.40844	0.67009		ENSMUSG00000009739	Pou6f1	0	0.571144	1.4857	1
	ENSMUSG00000036067	Slc2a6	1	1.42563	2.68632	1.93136e-15		ENSMUSG00000024521	Pmaip1	1	1.58391	2.99781	2.46674e-09		ENSMUSG00000026815	Gfi1b	0	0.493106	1.40747	0.674172		ENSMUSG00000021876	Rnase4	0	0.570315	1.48485	1
	ENSMUSG00000038843	Gcnt1	1	1.424	2.68328	1.9331e-14		ENSMUSG00000038179	Slamf7	1	1.58383	2.99764	8.47152e-08		ENSMUSG00000111394	Gm49759	0	0.492086	1.40648	0.702071		ENSMUSG00000013936	Myl2	0	0.56879	1.48328	1
	ENSMUSG00000053318	Slamf8	1	1.41231	2.66163	0.00209185		ENSMUSG00000081219	Bambi-ps1	1	1.58061	2.99096	1.38234e-06		ENSMUSG00000028572	Hook1	0	0.491907	1.4063	0.793959		ENSMUSG00000005540	Fcer2a	0	0.567925	1.48239	1
	ENSMUSG00000080921	Rpl38-ps2	0	1.41004	2.65744	0.058154		ENSMUSG00000114554	5430425K12Rik	1	1.57948	2.98862	0.00046291		ENSMUSG00000037847	Nmrk1	0	0.491345	1.40575	0.578023		ENSMUSG00000085148	Mir22hg	0	0.567778	1.48224	0.891009
	ENSMUSG00000040809	Chil3	1	1.39416	2.62835	1.81026e-19		ENSMUSG00000055652	Klhl25	1	1.5789	2.98743	7.16889e-15		ENSMUSG00000027305	Ndufaf1	0	0.489777	1.40423	0.396146		ENSMUSG00000078942	Naip6	0	0.565414	1.47981	1
	ENSMUSG00000017057	Il13ra1	1	1.39126	2.62308	1.94211e-07		ENSMUSG00000033739	Fkbpl	1	1.5787	2.98701	7.38994e-12		ENSMUSG00000103041	Gm37305	0	0.487435	1.40195	0.611074		ENSMUSG00000029648	Flt1	0	0.562725	1.47706	1
	ENSMUSG00000005057	Sh2b2	1	1.38945	2.61979	2.61623e-10		ENSMUSG00000052837	Junb	1	1.57109	2.97128	2.1599e-16		ENSMUSG00000001865	Cpa3	0	0.486376	1.40092	0.538073		ENSMUSG00000103271	Ighv4-2	0	0.561408	1.47571	1
	ENSMUSG00000030276	Ttll3	1	1.38761	2.61645	5.60878e-05		ENSMUSG00000029650	Slc46a3	1	1.56616	2.96116	3.31003e-09		ENSMUSG00000034422	Parp14	0	0.484019	1.39863	0.269252		ENSMUSG00000111752	Gm38575	0	0.560908	1.4752	0.788849
	ENSMUSG00000030107	Usp18	1	1.38596	2.61347	1.73535e-05		ENSMUSG00000026073	Il1r2	1	1.56266	2.95397	2.6736e-17		ENSMUSG00000058997	Vwa8	0	0.480525	1.39525	0.307307		ENSMUSG00000093894	Ighv1-53	0	0.559562	1.47382	1
	ENSMUSG00000024672	Ms4a7	1	1.38212	2.60651	0.000701946		ENSMUSG00000021108	Prkch	1	1.55936	2.94724	1.23664e-06		ENSMUSG00000106743	Gm42847	0	0.479808	1.39456	0.730447		ENSMUSG00000095335	Igkv3-5	0	0.558097	1.47233	1
	ENSMUSG00000033508	Asprv1	1	1.37284	2.5898	8.01562e-10		ENSMUSG00000027398	Il1b	1	1.55308	2.93444	1.35071e-12		ENSMUSG00000045039	Megf8	0	0.479271	1.39404	0.706775		ENSMUSG00000025014	Dntt	0	0.557815	1.47204	0.951014
	ENSMUSG00000034353	Ramp1	1	1.37132	2.58707	1.54446e-06		ENSMUSG00000053332	Gas5	1	1.55124	2.93068	1.89303e-09		ENSMUSG00000022157	Mcpt8	0	0.478579	1.39337	0.572354		ENSMUSG00000039976	Tbc1d16	0	0.557292	1.4715	1
	ENSMUSG00000002108	Nr1h3	1	1.37127	2.58698	0.00272346		ENSMUSG00000050666	Vstm4	1	1.53982	2.90758	0.00879682		ENSMUSG00000022827	Rabl3	0	0.478571	1.39336	0.509743		ENSMUSG00000026749	Nek6	0	0.556871	1.47108	0.25915
	ENSMUSG00000020961	Ston2	1	1.36732	2.5799	2.01645e-07		ENSMUSG00000025059	Gk	1	1.53011	2.88808	1.26539e-23		ENSMUSG00000025014	Dntt	0	0.47596	1.39084	0.56911		ENSMUSG00000083282	Ctsf	0	0.556089	1.47028	1
	ENSMUSG00000028270	Gbp2	1	1.36288	2.57197	4.73339e-10		ENSMUSG00000036594	H2-Aa	1	1.52659	2.88104	1.35384e-09		ENSMUSG00000113634	Gm36756	0	0.4759	1.39079	0.646887		ENSMUSG00000049971	Glt1d1	0	0.553052	1.46719	1
	ENSMUSG00000039236	Isg20	1	1.36247	2.57125	1.41706e-13		ENSMUSG00000056260	Lrif1	1	1.52443	2.87674	5.43695e-10		ENSMUSG00000049422	Chchd10	0	0.475425	1.39033	0.622068		ENSMUSG00000102777	Gm38161	0	0.552672	1.4668	1
	ENSMUSG00000025014	Dntt	1	1.36088	2.56841	8.65101e-06		ENSMUSG00000000982	Ccl3	1	1.52439	2.87666	5.17845e-05		ENSMUSG00000064330	Pde6h	0	0.473827	1.38879	0.726455		ENSMUSG00000026938	Fcna	0	0.552126	1.46624	1
	ENSMUSG00000030748	Il4ra	1	1.36086	2.56838	3.54013e-18		ENSMUSG00000033488	Cryzl2	1	1.51593	2.85984	5.84219e-10		ENSMUSG00000026768	Itga8	0	0.472923	1.38792	0.699057		ENSMUSG00000034664	Itga2b	0	0.551819	1.46593	0.871942
	ENSMUSG00000108633	Gm44694	1	1.35718	2.56183	0.0285996		ENSMUSG00000023827	Agpat4	1	1.51544	2.85887	1.83548e-11		ENSMUSG00000076545	Igkv4-72	0	0.471655	1.3867	0.890446		ENSMUSG00000086564	Cd101	0	0.550281	1.46437	0.627346
	ENSMUSG00000055407	Map6	1	1.35655	2.56073	0.00060797		ENSMUSG00000026628	Atf3	1	1.51434	2.85668	2.76497e-05		ENSMUSG00000102777	Gm38161	0	0.470332	1.38543	0.717758		ENSMUSG00000109429	Gm45223	0	0.550099	1.46419	1
	ENSMUSG00000002944	Cd36	1	1.35436	2.55684	0.00420731		ENSMUSG00000040809	Chil3	1	1.51011	2.84833	9.18472e-25		ENSMUSG00000037370	Enpp1	0	0.469261	1.3844	0.704212		ENSMUSG00000073529	F830208F22Rik	0	0.548973	1.46304	0.820741
	ENSMUSG00000023349	Clec4n	1	1.34965	2.5485	0.000618344		ENSMUSG00000027514	Zbp1	1	1.50292	2.83416	1.31005e-10		ENSMUSG00000031976	Urb2	0	0.468444	1.38362	0.646887		ENSMUSG00000003038	Hmgn2	0	0.547103	1.46115	0.749802
	ENSMUSG00000015474	Ppt2	1	1.34551	2.5412	7.20539e-10		ENSMUSG00000070348	Ccnd1	1	1.50287	2.83406	6.39929e-08		ENSMUSG00000070461	BX649560.1	0	0.468352	1.38353	0.550929		ENSMUSG00000103520	1110025M09Rik	0	0.54685	1.46089	1
	ENSMUSG00000006344	Ggt5	1	1.34525	2.54074	8.36048e-13		ENSMUSG00000062488	Ifit3b	1	1.50124	2.83086	0.000151955		ENSMUSG00000020010	Vnn3	0	0.467149	1.38238	0.447868		ENSMUSG00000063458	Lrmda	0	0.545471	1.4595	0.747435
	ENSMUSG00000027253	Lrp4	1	1.34096	2.53319	2.97498e-14		ENSMUSG00000033157	Abhd10	1	1.49974	2.82791	3.06185e-17		ENSMUSG00000076577	Igkv8-30	0	0.467118	1.38234	0.895587		ENSMUSG00000023132	Gzma	0	0.544482	1.4585	1
	ENSMUSG00000020681	Ace	1	1.3378	2.52765	4.65579e-06		ENSMUSG00000023022	Lima1	1	1.49554	2.81969	1.96388e-28		ENSMUSG00000026187	Xrcc5	0	0.466985	1.38222	0.667908		ENSMUSG00000003882	Il7r	0	0.544328	1.45834	0.895014
	ENSMUSG00000021773	Comtd1	1	1.33493	2.52263	3.90143e-16		ENSMUSG00000027488	Snta1	1	1.49287	2.81449	1.12938e-05		ENSMUSG00000036693	Nop14	0	0.466899	1.38214	0.582693		ENSMUSG00000055493	Epm2a	0	0.543358	1.45736	1
	ENSMUSG00000037185	Krt80	1	1.33152	2.51667	1.08576e-16		ENSMUSG00000030851	Ldhc	1	1.49196	2.81271	0.000816955		ENSMUSG00000051149	Adnp	0	0.466507	1.38176	0.719558		ENSMUSG00000036181	Hist1h1c	0	0.543172	1.45717	0.746762
	ENSMUSG00000003038	Hmgn2	1	1.32794	2.51044	7.88343e-07		ENSMUSG00000000318	Clec10a	1	1.4804	2.79025	1.46655e-06		ENSMUSG00000017386	Traf4	0	0.466063	1.38134	0.739086		ENSMUSG00000020053	Igf1	0	0.541821	1.45581	1
	ENSMUSG00000070348	Ccnd1	1	1.32276	2.50144	8.81622e-06		ENSMUSG00000109715	Gm45606	1	1.47707	2.78382	9.57877e-05		ENSMUSG00000040189	Ccdc114	0	0.465109	1.38042	0.683656		ENSMUSG00000018927	Ccl6	0	0.541115	1.4551	0.409728
	ENSMUSG00000074876	Spata5l1	1	1.31908	2.49507	0.00485965		ENSMUSG00000102856	Gm37084	1	1.47319	2.77634	0.0478399		ENSMUSG00000021895	Arhgef3	0	0.464767	1.38009	0.250312		ENSMUSG00000059657	Stfa2l1	0	0.538114	1.45207	0.785869
	ENSMUSG00000094594	Tpd52-ps	1	1.31592	2.48962	0.000166532		ENSMUSG00000038843	Gcnt1	1	1.47075	2.77166	1.10208e-16		ENSMUSG00000094627	Gm10182	0	0.464297	1.37964	0.72119		ENSMUSG00000054770	Kctd18	0	0.536292	1.45024	0.811065
	ENSMUSG00000048222	Mfap1b	1	1.31152	2.48202	8.18411e-13		ENSMUSG00000031712	Il15	1	1.46875	2.76782	6.3016e-14		ENSMUSG00000025867	Cplx2	0	0.464212	1.37956	0.704212		ENSMUSG00000003585	Sec14l2	0	0.533718	1.44766	1
	ENSMUSG00000038811	Gngt2	1	1.31069	2.4806	2.05058e-08		ENSMUSG00000076564	Igkv12-46	0	1.46864	2.76761	0.0807493		ENSMUSG00000069893	9930111J21Rik1	0	0.464099	1.37946	0.426162		ENSMUSG00000034164	Emid1	0	0.533251	1.44719	1
	ENSMUSG00000020785	Camkk1	1	1.31039	2.48009	0.00726977		ENSMUSG00000058809	Hspd1-ps3	0	1.4656	2.76178	0.416675		ENSMUSG00000032051	Fdx1	0	0.464036	1.3794	0.674172		ENSMUSG00000045763	Basp1	0	0.532236	1.44617	0.298298
	ENSMUSG00000029482	Aacs	1	1.31028	2.47989	8.13157e-17		ENSMUSG00000043263	Ifi209	1	1.46385	2.75844	1.05968e-09		ENSMUSG00000026110	Mgat4a	0	0.463414	1.3788	0.410988		ENSMUSG00000043557	Mdga1	0	0.531323	1.44525	1
	ENSMUSG00000033540	Idua	1	1.30933	2.47826	5.74277e-08		ENSMUSG00000027620	Rbm39	1	1.45365	2.739	3.22308e-08		ENSMUSG00000031959	Wdr59	0	0.462032	1.37748	0.579004		ENSMUSG00000054905	Stfa3	0	0.529779	1.44371	1
	ENSMUSG00000101585	1600010M07Rik	1	1.30759	2.47528	0.000321173		ENSMUSG00000002797	Ggct	1	1.45108	2.73412	1.83177e-08		ENSMUSG00000026070	Il18r1	0	0.461275	1.37676	0.410988		ENSMUSG00000044562	Rasip1	0	0.529422	1.44335	0.98304
	ENSMUSG00000018930	Ccl4	1	1.29742	2.45789	0.00913034		ENSMUSG00000044811	Cd300c2	1	1.45091	2.7338	1.28437e-15		ENSMUSG00000033253	Szt2	0	0.459769	1.37532	0.1918		ENSMUSG00000038264	Sema7a	0	0.526989	1.44092	0.365382
	ENSMUSG00000029545	Acads	1	1.29709	2.45733	4.80445e-11		ENSMUSG00000023216	Epb42	1	1.4508	2.7336	0.0131569		ENSMUSG00000091575	2010016I18Rik	0	0.4595	1.37507	0.802295		ENSMUSG00000005983	1700037C18Rik	0	0.52599	1.43992	1
	ENSMUSG00000025545	Clybl	1	1.29694	2.45707	0.0369502		ENSMUSG00000102037	Bcl2a1a	1	1.44699	2.72638	0.000468974		ENSMUSG00000068036	Afdn	0	0.459424	1.37499	0.254328		ENSMUSG00000030157	Clec2d	0	0.525923	1.43985	1
	ENSMUSG00000070605	Zfp992	1	1.29276	2.44996	0.00353423		ENSMUSG00000025014	Dntt	1	1.44273	2.71835	1.54439e-06		ENSMUSG00000074896	Ifit3	0	0.459254	1.37483	0.664519		ENSMUSG00000073771	Btbd19	0	0.525315	1.43925	1
	ENSMUSG00000081219	Bambi-ps1	1	1.29135	2.44757	0.00036424		ENSMUSG00000062933	Gm10123	1	1.44168	2.71638	0.00826606		ENSMUSG00000030109	Slc6a12	0	0.45821	1.37384	0.509743		ENSMUSG00000030409	Dmpk	0	0.524938	1.43887	0.951014
	ENSMUSG00000021185	Dglucy	1	1.28924	2.444	1.59133e-10		ENSMUSG00000027533	Fabp5	1	1.4327	2.69951	2.28809e-10		ENSMUSG00000031732	Phlpp2	0	0.457684	1.37334	0.666808		ENSMUSG00000049191	Rtl5	0	0.524045	1.43798	1
	ENSMUSG00000027533	Fabp5	1	1.28723	2.4406	7.11273e-08		ENSMUSG00000033508	Asprv1	1	1.43226	2.6987	1.40534e-11		ENSMUSG00000022801	Lrch3	0	0.457675	1.37333	0.364104		ENSMUSG00000057337	Chst3	0	0.522776	1.43672	1
	ENSMUSG00000057123	Gja5	1	1.28448	2.43595	0.00602997		ENSMUSG00000037217	Syn1	1	1.42826	2.69122	5.74436e-09		ENSMUSG00000030577	Cd22	0	0.457523	1.37318	0.717758		ENSMUSG00000110279	Gm45552	0	0.522506	1.43645	1
	ENSMUSG00000015656	Hspa8	1	1.28377	2.43475	2.25765e-08		ENSMUSG00000026131	Dst	1	1.42815	2.69102	0.00625546		ENSMUSG00000036172	Cd200r3	0	0.457368	1.37303	0.705249		ENSMUSG00000037966	Ninj1	0	0.519173	1.43313	0.387294
	ENSMUSG00000020642	Rnf144a	1	1.28351	2.43431	1.25689e-13		ENSMUSG00000052688	Rab7b	1	1.42742	2.68964	0.00420033		ENSMUSG00000060550	H2-Q7	0	0.457076	1.37276	0.756971		ENSMUSG00000058163	Gm5431	0	0.51878	1.43274	1
	ENSMUSG00000033355	Rtp4	1	1.27315	2.41689	9.64195e-05		ENSMUSG00000109274	Gm45133	1	1.42409	2.68346	0.00128804		ENSMUSG00000030340	Scnn1a	0	0.456914	1.3726	0.366536		ENSMUSG00000096638	Ighv2-9	0	0.517167	1.43114	1
	ENSMUSG00000039191	Rbpj	1	1.26741	2.4073	1.43049e-20		ENSMUSG00000017697	Ada	1	1.42057	2.67692	5.13982e-21		ENSMUSG00000039201	Tbc1d25	0	0.456796	1.37249	0.550929		ENSMUSG00000094942	Gm3604	0	0.516786	1.43076	1
	ENSMUSG00000078921	Tgtp2	1	1.2592	2.39364	0.00585916		ENSMUSG00000052684	Jun	1	1.41909	2.67416	5.92919e-10		ENSMUSG00000005107	Slc2a9	0	0.456172	1.3719	0.432909		ENSMUSG00000039328	Rnf122	0	0.51656	1.43054	1
	ENSMUSG00000074733	Zfp950	1	1.25772	2.39117	0.00373382		ENSMUSG00000029993	Nfu1	1	1.41679	2.66991	1.88579e-31		ENSMUSG00000058070	Eml1	0	0.456064	1.37179	0.78973		ENSMUSG00000111167	Gm39321	0	0.51655	1.43053	0.374474
	ENSMUSG00000104818	Gm43661	1	1.25601	2.38834	0.036206		ENSMUSG00000000440	Pparg	1	1.41657	2.6695	2.1848e-06		ENSMUSG00000022586	Ly6i	0	0.454928	1.37071	0.846589		ENSMUSG00000078153	Psme2b	0	0.515893	1.42988	1
	ENSMUSG00000038179	Slamf7	1	1.25579	2.38799	5.58362e-05		ENSMUSG00000030159	Clec1b	1	1.41614	2.66871	0.0106176		ENSMUSG00000081272	Gm13509	0	0.454163	1.36999	0.816564		ENSMUSG00000042066	Tmcc2	0	0.51577	1.42976	1
	ENSMUSG00000053175	Bcl3	1	1.25027	2.37886	1.55325e-10		ENSMUSG00000002944	Cd36	1	1.41251	2.66199	0.00160604		ENSMUSG00000074903	Gm2058	0	0.453805	1.36965	0.920406		ENSMUSG00000008193	Spib	0	0.514641	1.42864	1
	ENSMUSG00000009687	Fxyd5	1	1.24928	2.37723	2.86508e-14		ENSMUSG00000037185	Krt80	1	1.40943	2.65633	7.17709e-20		ENSMUSG00000041936	Agrn	0	0.453765	1.36961	0.373332		ENSMUSG00000042978	Sbk1	0	0.514317	1.42832	1
	ENSMUSG00000031712	Il15	1	1.2492	2.3771	1.05262e-09		ENSMUSG00000060591	Ifitm2	1	1.40937	2.65621	7.32638e-20		ENSMUSG00000038037	Socs1	0	0.450849	1.36684	0.63914		ENSMUSG00000029438	Bcl7a	0	0.514157	1.42816	1
	ENSMUSG00000032773	Chrm1	1	1.24915	2.37701	0.000288259		ENSMUSG00000020709	Adap2	1	1.40723	2.65227	9.24945e-07		ENSMUSG00000040624	Plekhg1	0	0.450667	1.36667	0.509743		ENSMUSG00000001053	N4bp3	0	0.512215	1.42624	0.772104
	ENSMUSG00000027506	Tpd52	1	1.24685	2.37323	8.51928e-23		ENSMUSG00000015396	Cd83	1	1.40386	2.64608	1.09163e-05		ENSMUSG00000005360	Slc1a3	0	0.449844	1.36589	0.751169		ENSMUSG00000005360	Slc1a3	0	0.51207	1.42609	1
	ENSMUSG00000034674	Tdg	1	1.24608	2.37197	6.38017e-20		ENSMUSG00000076672	Ighv3-6	1	1.40288	2.64428	0.00438889		ENSMUSG00000057802	Gm10030	0	0.449612	1.36567	0.666808		ENSMUSG00000039264	Gimap3	0	0.510901	1.42494	1
	ENSMUSG00000018920	Cxcl16	1	1.24572	2.37136	0.0243496		ENSMUSG00000040435	Ppp1r15a	1	1.39393	2.62793	3.15037e-05		ENSMUSG00000038456	Dennd2a	0	0.449137	1.36522	0.373332		ENSMUSG00000089956	Gm16553	0	0.510216	1.42426	1
	ENSMUSG00000058624	Gda	1	1.23844	2.35943	1.30346e-24		ENSMUSG00000052676	Zmat1	1	1.39204	2.62449	2.54622e-08		ENSMUSG00000090290	Tarbp1	0	0.448177	1.36432	0.719746		ENSMUSG00000026594	Ralgps2	0	0.507129	1.42122	1
	ENSMUSG00000020460	Rps27a	1	1.23769	2.3582	0.0211693		ENSMUSG00000041633	Kctd12b	1	1.38902	2.61901	0.00337548		ENSMUSG00000029417	Cxcl9	0	0.447427	1.36361	0.746157		ENSMUSG00000022309	Angpt1	0	0.50694	1.42103	1
	ENSMUSG00000067365	Tmem128	1	1.23455	2.35308	3.10343e-10		ENSMUSG00000021322	Aoah	1	1.38537	2.61239	8.85112e-21		ENSMUSG00000023460	Rab12	0	0.44708	1.36328	0.543601		ENSMUSG00000027200	Sema6d	0	0.505264	1.41938	1
	ENSMUSG00000036138	Acaa1a	1	1.2282	2.34275	9.37727e-14		ENSMUSG00000067719	Gm10221	1	1.3849	2.61154	0.00119659		ENSMUSG00000020847	Rph3al	0	0.447052	1.36325	0.642559		ENSMUSG00000076617	Ighm	0	0.504672	1.4188	0.866776
	ENSMUSG00000059588	Calcrl	1	1.22647	2.33993	2.49351e-08		ENSMUSG00000038267	Slc22a23	1	1.38366	2.6093	0.00333725		ENSMUSG00000043372	Hexim2	0	0.445587	1.36187	0.726828		ENSMUSG00000057802	Gm10030	0	0.503723	1.41787	1
	ENSMUSG00000058818	Pirb	1	1.22159	2.33204	3.72098e-20		ENSMUSG00000032221	Mns1	1	1.38293	2.60798	1.30043e-12		ENSMUSG00000073418	C4b	0	0.445573	1.36186	0.836008		ENSMUSG00000018924	Alox15	0	0.503138	1.41729	1
	ENSMUSG00000035493	Tgfbi	1	1.22119	2.33139	3.46266e-15		ENSMUSG00000034686	Prr7	1	1.38159	2.60556	8.44602e-06		ENSMUSG00000017309	Cd300lg	0	0.44537	1.36166	0.756973		ENSMUSG00000036172	Cd200r3	0	0.502902	1.41706	1
	ENSMUSG00000037762	Slc16a9	1	1.21453	2.32065	0.0176747		ENSMUSG00000030748	Il4ra	1	1.37949	2.60176	2.60173e-20		ENSMUSG00000056919	Cep162	0	0.444912	1.36123	0.690353		ENSMUSG00000022899	Slc15a2	0	0.501528	1.41571	1
	ENSMUSG00000096108	Ighv11-2	1	1.21276	2.3178	0.0280844		ENSMUSG00000101599	Gm20342	1	1.3768	2.59692	0.000539487		ENSMUSG00000029608	Rph3a	0	0.444722	1.36105	0.674172		ENSMUSG00000044617	Zbtb39	0	0.500912	1.41511	0.294629
	ENSMUSG00000022193	Psmb5	1	1.20477	2.30501	9.44439e-16		ENSMUSG00000039208	Metrnl	1	1.37251	2.58921	3.84847e-22		ENSMUSG00000070305	Mpzl3	0	0.444227	1.36058	0.580968		ENSMUSG00000050075	Gpr171	0	0.499334	1.41356	1
	ENSMUSG00000030470	Csrp3	1	1.20354	2.30305	0.0376002		ENSMUSG00000025036	Sfxn2	1	1.37195	2.58819	2.14687e-10		ENSMUSG00000029592	Usp30	0	0.443509	1.35991	0.474383		ENSMUSG00000022836	Mylk	0	0.498803	1.41304	1
	ENSMUSG00000022723	Crybg3	1	1.2028	2.30187	2.38893e-08		ENSMUSG00000015305	Sash1	1	1.36885	2.58265	0.00158769		ENSMUSG00000057137	Tmem140	0	0.443193	1.35961	0.537107		ENSMUSG00000026548	Slamf9	0	0.498034	1.41229	1
	ENSMUSG00000034880	Mrpl34	1	1.2005	2.2982	7.3728e-15		ENSMUSG00000053113	Socs3	1	1.36819	2.58146	9.98135e-08		ENSMUSG00000051650	B3gnt2	0	0.442799	1.35924	0.617824		ENSMUSG00000002289	Angptl4	0	0.497672	1.41193	1
	ENSMUSG00000026628	Atf3	1	1.19795	2.29414	0.00209414		ENSMUSG00000018920	Cxcl16	1	1.36593	2.57743	0.00671247		ENSMUSG00000035041	Creb3l3	0	0.442091	1.35857	0.673308		ENSMUSG00000025911	Adhfe1	0	0.497402	1.41167	1
	ENSMUSG00000015305	Sash1	1	1.19618	2.29133	0.0111056		ENSMUSG00000101609	Kcnq1ot1	1	1.36284	2.57191	0.00179205		ENSMUSG00000033792	Atp7a	0	0.440199	1.35679	0.447011		ENSMUSG00000020387	Jade2	0	0.497183	1.41145	0.0763955
	ENSMUSG00000054169	Ceacam10	1	1.19597	2.29099	1.16633e-10		ENSMUSG00000031709	Tbc1d9	1	1.36188	2.5702	0.000207552		ENSMUSG00000045349	Sh2d5	0	0.439958	1.35656	0.674172		ENSMUSG00000005339	Fcer1a	0	0.496016	1.41031	1
	ENSMUSG00000035692	Isg15	1	1.1941	2.28801	3.48621e-05		ENSMUSG00000036181	Hist1h1c	1	1.36069	2.56809	5.05258e-08		ENSMUSG00000082292	Gm12250	0	0.439361	1.356	0.651705		ENSMUSG00000076547	Igkv4-70	0	0.495924	1.41022	1
	ENSMUSG00000102975	Gm37347	1	1.19216	2.28494	0.0310936		ENSMUSG00000074361	C5ar2	1	1.35527	2.55845	6.52842e-10		ENSMUSG00000044452	Zfp507	0	0.438555	1.35525	0.6404		ENSMUSG00000054675	Tmem119	0	0.495131	1.40945	1
	ENSMUSG00000079065	BC005561	1	1.18798	2.27833	0.0222805		ENSMUSG00000069899	Gm12166	1	1.353	2.55442	0.00171357		ENSMUSG00000028270	Gbp2	0	0.438062	1.35478	0.459159		ENSMUSG00000053559	Smagp	0	0.494657	1.40899	1
	ENSMUSG00000037217	Syn1	1	1.18784	2.27812	4.44411e-06		ENSMUSG00000094594	Tpd52-ps	1	1.35273	2.55396	4.55126e-05		ENSMUSG00000000303	Cdh1	0	0.437215	1.35399	0.726455		ENSMUSG00000002985	Apoe	0	0.494194	1.40853	0.403077
	ENSMUSG00000059089	Fcgr4	1	1.18735	2.27734	1.41001e-10		ENSMUSG00000030917	Tmem159	1	1.34986	2.54888	1.38882e-13		ENSMUSG00000046668	Cxxc5	0	0.436505	1.35332	0.695543		ENSMUSG00000001166	Oas1c	0	0.494177	1.40852	1
	ENSMUSG00000015396	Cd83	1	1.18715	2.27702	0.000565984		ENSMUSG00000090394	4930523C07Rik	1	1.34909	2.54752	7.78372e-33		ENSMUSG00000048106	4632415L05Rik	0	0.43604	1.35289	0.674081		ENSMUSG00000032053	Pou2af1	0	0.493769	1.40812	1
	ENSMUSG00000024670	Cd6	1	1.18615	2.27544	0.00106888		ENSMUSG00000073490	Ifi207	1	1.34841	2.54631	4.79902e-06		ENSMUSG00000057337	Chst3	0	0.435094	1.352	0.674172		ENSMUSG00000030041	M1ap	0	0.49256	1.40694	1
	ENSMUSG00000017697	Ada	1	1.18478	2.27329	9.21523e-14		ENSMUSG00000035692	Isg15	1	1.34562	2.54139	6.70608e-07		ENSMUSG00000105906	Iglc1	0	0.434741	1.35167	0.699057		ENSMUSG00000040229	Gpr34	0	0.492463	1.40684	1
	ENSMUSG00000016496	Cd274	1	1.18323	2.27085	0.00112573		ENSMUSG00000053559	Smagp	1	1.34391	2.53838	3.68552e-05		ENSMUSG00000045757	Zfp764	0	0.432859	1.34991	0.832348		ENSMUSG00000070315	4930581F22Rik	0	0.492194	1.40658	1
	ENSMUSG00000023235	Ccl25	1	1.18137	2.26793	0.0480202		ENSMUSG00000076613	Ighg2b	1	1.34332	2.53734	0.0125859		ENSMUSG00000038421	Fcrla	0	0.432825	1.34987	0.729945		ENSMUSG00000033880	Lgals3bp	0	0.491082	1.4055	0.84355
	ENSMUSG00000033917	Gde1	1	1.17975	2.26537	8.06316e-19		ENSMUSG00000024610	Cd74	1	1.33733	2.52683	1.07164e-07		ENSMUSG00000041849	Card6	0	0.432057	1.34916	0.447868		ENSMUSG00000035356	Nfkbiz	0	0.490551	1.40498	0.743167
	ENSMUSG00000001552	Jup	1	1.17966	2.26524	5.75758e-11		ENSMUSG00000024290	Rock1	1	1.33538	2.52341	8.55259e-07		ENSMUSG00000034570	Inpp5j	0	0.432017	1.34912	0.440274		ENSMUSG00000003379	Cd79a	0	0.489481	1.40394	1
	ENSMUSG00000022901	Cd86	1	1.17477	2.25756	8.29256e-07		ENSMUSG00000054582	Pabpc1l	1	1.33454	2.52195	3.27546e-08		ENSMUSG00000037022	Mmaa	0	0.431331	1.34848	0.615364		ENSMUSG00000047604	Frat2	0	0.488465	1.40295	0.356128
	ENSMUSG00000005360	Slc1a3	1	1.17436	2.25692	0.0270604		ENSMUSG00000009687	Fxyd5	1	1.33322	2.51964	1.69884e-17		ENSMUSG00000026096	Osgepl1	0	0.430635	1.34783	0.718054		ENSMUSG00000028634	Hivep3	0	0.488257	1.40275	1
	ENSMUSG00000023249	Parp3	1	1.17422	2.25671	5.15985e-07		ENSMUSG00000073889	Il11ra1	1	1.33092	2.51563	1.66997e-06		ENSMUSG00000032661	Oas3	0	0.430606	1.3478	0.599374		ENSMUSG00000004359	Spic	0	0.488147	1.40264	1
	ENSMUSG00000033739	Fkbpl	1	1.17078	2.25133	2.32023e-06		ENSMUSG00000090266	Mettl23	1	1.32902	2.51232	1.35297e-09		ENSMUSG00000030823	9130019O22Rik	0	0.428206	1.34556	0.623682		ENSMUSG00000053318	Slamf8	0	0.487536	1.40205	1
	ENSMUSG00000052776	Oas1a	1	1.1641	2.24094	2.64639e-07		ENSMUSG00000015980	Lrrc27	1	1.32796	2.51048	5.63232e-05		ENSMUSG00000022309	Angpt1	0	0.427132	1.34456	0.756647		ENSMUSG00000076576	Igkv6-32	0	0.487031	1.40156	1
	ENSMUSG00000074151	Nlrc5	1	1.1573	2.2304	0.00106005		ENSMUSG00000075370	Igll1	1	1.32598	2.50703	0.000834665		ENSMUSG00000062743	Zfp677	0	0.426491	1.34396	0.738602		ENSMUSG00000108268	Gm44187	0	0.486191	1.40074	1
	ENSMUSG00000006356	Crip2	1	1.15354	2.2246	0.0208862		ENSMUSG00000024608	Rps14	1	1.32154	2.49933	1.45304e-17		ENSMUSG00000030559	Rab38	0	0.42638	1.34386	0.803798		ENSMUSG00000022389	Tef	0	0.485858	1.40042	1
	ENSMUSG00000016487	Ppfibp1	1	1.15267	2.22325	0.0123837		ENSMUSG00000056116	H2-T22	1	1.3201	2.49683	1.16256e-23		ENSMUSG00000078580	E430018J23Rik	0	0.425482	1.34302	0.793959		ENSMUSG00000080058	Gm11175	0	0.48564	1.40021	1
	ENSMUSG00000094392	Gm3788	1	1.15252	2.22302	0.000688876		ENSMUSG00000029923	Rab19	1	1.31781	2.49287	1.99701e-07		ENSMUSG00000025876	Unc5a	0	0.424876	1.34246	0.817357		ENSMUSG00000114585	Gm32401	0	0.485353	1.39993	1
	ENSMUSG00000032221	Mns1	1	1.14759	2.21543	2.54491e-08		ENSMUSG00000048222	Mfap1b	1	1.31527	2.48848	6.19932e-14		ENSMUSG00000026354	Lct	0	0.423279	1.34097	0.550929		ENSMUSG00000034765	Dusp5	0	0.485199	1.39978	0.687294
	ENSMUSG00000000318	Clec10a	1	1.14541	2.21208	0.000710413		ENSMUSG00000025150	Cbr2	1	1.3135	2.48543	6.14988e-05		ENSMUSG00000002944	Cd36	0	0.422838	1.34056	0.744193		ENSMUSG00000093861	Igkv1-110	0	0.48514	1.39972	1
	ENSMUSG00000056116	H2-T22	1	1.14514	2.21167	7.43033e-17		ENSMUSG00000004709	Cd244a	1	1.31156	2.48209	4.26415e-05		ENSMUSG00000059305	Vpreb1	0	0.420778	1.33865	0.756837		ENSMUSG00000002109	Ddb2	0	0.485092	1.39967	1
	ENSMUSG00000087497	2810001G20Rik	1	1.14486	2.21125	0.00334513		ENSMUSG00000036138	Acaa1a	1	1.31115	2.48139	7.1505e-17		ENSMUSG00000089844	A530032D15Rik	0	0.420758	1.33863	0.570236		ENSMUSG00000068105	Tnfrsf13c	0	0.485066	1.39965	1
	ENSMUSG00000069874	Irgm2	1	1.14218	2.20715	3.87211e-07		ENSMUSG00000039236	Isg20	1	1.30851	2.47686	1.30911e-13		ENSMUSG00000097660	Gm26762	0	0.420497	1.33839	0.786327		ENSMUSG00000076435	Acsf2	0	0.48474	1.39933	1
	ENSMUSG00000049184	Purg	1	1.13399	2.19464	9.06617e-06		ENSMUSG00000014361	Mertk	1	1.30774	2.47553	0.000314241		ENSMUSG00000024670	Cd6	0	0.42034	1.33824	0.67009		ENSMUSG00000040592	Cd79b	0	0.484344	1.39895	1
	ENSMUSG00000090394	4930523C07Rik	1	1.13289	2.19298	7.1877e-22		ENSMUSG00000024081	Cebpz	1	1.30482	2.47054	1.02332e-13		ENSMUSG00000007476	Lrrc8a	0	0.420332	1.33824	0.726369		ENSMUSG00000051977	Prdm9	0	0.484021	1.39864	1
	ENSMUSG00000024812	Tjp2	1	1.13253	2.19244	0.0196752		ENSMUSG00000082292	Gm12250	1	1.3018	2.46536	0.000131447		ENSMUSG00000041915	Ammecr1l	0	0.420273	1.33818	0.491803		ENSMUSG00000017652	Cd40	0	0.4838	1.39842	1
	ENSMUSG00000023861	Mpc1	1	1.13079	2.18979	1.65964e-14		ENSMUSG00000044788	Fads6	1	1.30114	2.46423	1.85552e-05		ENSMUSG00000042548	Asxl1	0	0.418715	1.33674	0.256894		ENSMUSG00000079339	Ifit1bl1	0	0.483613	1.39824	1
	ENSMUSG00000026580	Selp	1	1.12982	2.18832	0.00767608		ENSMUSG00000028825	Rhd	1	1.29874	2.46015	0.00752598		ENSMUSG00000024664	Fads3	0	0.418507	1.33654	0.815393		ENSMUSG00000028439	Fam219a	0	0.483026	1.39767	0.365382
	ENSMUSG00000030917	Tmem159	1	1.12927	2.18748	2.54623e-09		ENSMUSG00000041954	Tnfrsf18	1	1.29598	2.45543	1.3887e-09		ENSMUSG00000041945	Mfsd9	0	0.415414	1.33368	0.582693		ENSMUSG00000053469	Tg	0	0.482526	1.39719	1
	ENSMUSG00000047592	Nxpe5	0	1.12847	2.18626	0.0972675		ENSMUSG00000028439	Fam219a	1	1.29597	2.45541	6.37413e-14		ENSMUSG00000060397	Zfp128	0	0.415284	1.33356	0.673308		ENSMUSG00000061311	Rag1	0	0.48241	1.39708	1
	ENSMUSG00000044701	Il27	1	1.12698	2.18402	0.00308		ENSMUSG00000023861	Mpc1	1	1.29484	2.45349	3.01793e-20		ENSMUSG00000068105	Tnfrsf13c	0	0.414144	1.33251	0.726676		ENSMUSG00000019828	Grm1	0	0.48223	1.3969	1
	ENSMUSG00000060586	H2-Eb1	1	1.12698	2.18401	4.44916e-05		ENSMUSG00000020460	Rps27a	1	1.29243	2.44941	0.00926565		ENSMUSG00000004500	Zfp324	0	0.413434	1.33185	0.674563		ENSMUSG00000030737	Slco2b1	0	0.482075	1.39675	1
	ENSMUSG00000097589	Dleu2	1	1.12659	2.18342	6.35983e-10		ENSMUSG00000107317	Gm19719	1	1.29209	2.44882	0.0288849		ENSMUSG00000060429	Sntb1	0	0.413041	1.33149	0.515707		ENSMUSG00000111478	Gm18251	0	0.481251	1.39595	1
	ENSMUSG00000020709	Adap2	1	1.12612	2.18271	0.000298826		ENSMUSG00000074570	Cass4	1	1.29142	2.44769	4.3313e-07		ENSMUSG00000040270	Bach2	0	0.412287	1.33079	0.711238		ENSMUSG00000002944	Cd36	0	0.480983	1.39569	1
	ENSMUSG00000030745	Il21r	1	1.12571	2.18209	0.00162388		ENSMUSG00000021773	Comtd1	1	1.2896	2.4446	3.03407e-16		ENSMUSG00000024236	Svil	0	0.412123	1.33064	0.43289		ENSMUSG00000067149	Jchain	0	0.480953	1.39567	1
	ENSMUSG00000067212	H2-T23	1	1.12544	2.18168	2.09202e-12		ENSMUSG00000029810	Tmem176b	1	1.28703	2.44026	0.000124879		ENSMUSG00000074811	Hps6	0	0.41183	1.33037	0.454202		ENSMUSG00000027072	Prg3	0	0.48054	1.39527	1
	ENSMUSG00000048163	Selplg	1	1.12464	2.18047	3.69449e-11		ENSMUSG00000097347	Gm17275	1	1.28695	2.44012	0.00173993		ENSMUSG00000033540	Idua	0	0.411152	1.32975	0.542555		ENSMUSG00000113204	Gm46430	0	0.480423	1.39515	1
	ENSMUSG00000024079	Eif2ak2	1	1.12422	2.17983	6.23619e-16		ENSMUSG00000071203	Naip5	1	1.28622	2.43888	3.99005e-08		ENSMUSG00000050600	Zfp831	0	0.411061	1.32966	0.426162		ENSMUSG00000090215	Trim34b	0	0.480394	1.39513	1
	ENSMUSG00000070354	Evi2	1	1.12343	2.17864	8.39011e-06		ENSMUSG00000068264	Ap5s1	1	1.28498	2.43679	5.42021e-06		ENSMUSG00000112539	Gm40787	0	0.410113	1.32879	0.711238		ENSMUSG00000035459	Stab2	0	0.479743	1.3945	1
	ENSMUSG00000030747	Dgat2	1	1.12069	2.1745	2.35064e-10		ENSMUSG00000032690	Oas2	1	1.28206	2.43186	0.000247772		ENSMUSG00000020638	Cmpk2	0	0.407821	1.32668	0.474383		ENSMUSG00000022092	Ppp3cc	0	0.47941	1.39417	1
	ENSMUSG00000021986	Amer2	1	1.11979	2.17315	1.4181e-09		ENSMUSG00000071076	Jund	1	1.28052	2.42927	4.94716e-13		ENSMUSG00000029790	Cep41	0	0.407662	1.32653	0.677681		ENSMUSG00000004698	Hdac9	0	0.476341	1.39121	1
	ENSMUSG00000113701	B230303A05Rik	1	1.11768	2.16998	1.63713e-08		ENSMUSG00000027562	Car2	1	1.27727	2.42379	0.0014232		ENSMUSG00000014039	Prdm15	0	0.406566	1.32553	0.642244		ENSMUSG00000104291	A130071D04Rik	0	0.47622	1.39109	1
	ENSMUSG00000052684	Jun	1	1.1174	2.16956	5.37392e-06		ENSMUSG00000047953	Gp5	0	1.27657	2.42262	0.0502413		ENSMUSG00000012819	Cdh23	0	0.40471	1.32382	0.697583		ENSMUSG00000028680	Plk3	0	0.475874	1.39076	0.552081
	ENSMUSG00000041954	Tnfrsf18	1	1.11459	2.16533	8.09514e-07		ENSMUSG00000027236	Eif3j1	1	1.27488	2.41979	6.99204e-11		ENSMUSG00000074677	Sirpb1c	0	0.404396	1.32354	0.43289		ENSMUSG00000056708	Ier5	0	0.475025	1.38994	0.373274
	ENSMUSG00000098234	Snhg6	1	1.11134	2.16046	0.00599319		ENSMUSG00000025997	Ikzf2	1	1.27332	2.41718	0.0475451		ENSMUSG00000023966	Rsph9	0	0.403054	1.3223	0.791357		ENSMUSG00000006235	Epor	0	0.474208	1.38916	1
	ENSMUSG00000078853	Igtp	1	1.11132	2.16043	6.26269e-07		ENSMUSG00000083041	Gmfg-ps	1	1.2726	2.41597	0.00634355		ENSMUSG00000026200	Glb1l	0	0.402875	1.32214	0.638545		ENSMUSG00000111378	Gm47230	0	0.474102	1.38905	1
	ENSMUSG00000022218	Tgm1	1	1.11072	2.15953	1.13124e-05		ENSMUSG00000027253	Lrp4	1	1.27215	2.41522	1.15829e-13		ENSMUSG00000067297	Ifit1bl2	0	0.402309	1.32162	0.596081		ENSMUSG00000020359	Phykpl	0	0.473971	1.38893	1
	ENSMUSG00000053347	Zfp943	1	1.10898	2.15692	1.12372e-07		ENSMUSG00000059588	Calcrl	1	1.27103	2.41334	1.35297e-09		ENSMUSG00000078670	Fam174b	0	0.402171	1.32149	0.737289		ENSMUSG00000021880	Rnase6	0	0.473346	1.38833	0.610479
	ENSMUSG00000066621	Tecpr1	1	1.1081	2.15562	2.21158e-10		ENSMUSG00000063160	Numbl	1	1.27074	2.41286	9.47958e-05		ENSMUSG00000033355	Rtp4	0	0.401563	1.32094	0.664519		ENSMUSG00000022157	Mcpt8	0	0.472875	1.38787	1
	ENSMUSG00000024082	Ndufaf7	1	1.10717	2.15423	1.06931e-12		ENSMUSG00000067212	H2-T23	1	1.26994	2.41152	8.29269e-17		ENSMUSG00000024238	Zeb1	0	0.400567	1.32003	0.410988		ENSMUSG00000062040	Zfp27	0	0.472567	1.38758	1
	ENSMUSG00000064284	Cdpf1	1	1.10687	2.15378	0.0108057		ENSMUSG00000038418	Egr1	1	1.26617	2.40523	0.00021417		ENSMUSG00000019808	Adat2	0	0.399931	1.31945	0.61575		ENSMUSG00000056145	AI504432	0	0.471947	1.38698	1
	ENSMUSG00000039981	Zc3h12d	1	1.10391	2.14936	0.00217916		ENSMUSG00000030107	Usp18	1	1.26533	2.40383	4.31949e-05		ENSMUSG00000028293	Slc35a1	0	0.399649	1.31919	0.650606		ENSMUSG00000115276	9930017N22Rik	0	0.470844	1.38592	1
	ENSMUSG00000074361	C5ar2	1	1.10241	2.14712	2.21467e-06		ENSMUSG00000053175	Bcl3	1	1.26459	2.40259	7.37746e-12		ENSMUSG00000047747	Rnf150	0	0.399469	1.31902	0.720913		ENSMUSG00000026170	Cyp27a1	0	0.468227	1.38341	1
	ENSMUSG00000001065	Zfp276	1	1.10202	2.14655	4.06521e-10		ENSMUSG00000031939	Taf1d	1	1.2607	2.39612	0.000686594		ENSMUSG00000046201	Scaf8	0	0.398704	1.31832	0.366536		ENSMUSG00000030109	Slc6a12	0	0.46797	1.38316	0.881778
	ENSMUSG00000074570	Cass4	1	1.10125	2.1454	5.599e-05		ENSMUSG00000070354	Evi2	1	1.25959	2.39428	1.74742e-07		ENSMUSG00000039153	Runx2	0	0.397015	1.31678	0.252108		ENSMUSG00000027347	Rasgrp1	0	0.467191	1.38242	1
	ENSMUSG00000023827	Agpat4	1	1.09989	2.14339	5.76652e-06		ENSMUSG00000040659	Efhd2	1	1.25897	2.39325	6.63423e-32		ENSMUSG00000086564	Cd101	0	0.396849	1.31663	0.573337		ENSMUSG00000022010	Tsc22d1	0	0.466706	1.38195	1
	ENSMUSG00000023034	Nr4a1	1	1.09564	2.13708	7.51948e-06		ENSMUSG00000029919	Hpgds	1	1.25823	2.39202	0.00188654		ENSMUSG00000018372	Cep95	0	0.39613	1.31597	0.605316		ENSMUSG00000036585	Fgf1	0	0.46645	1.38171	1
	ENSMUSG00000029993	Nfu1	1	1.0952	2.13642	8.64643e-18		ENSMUSG00000036067	Slc2a6	1	1.25788	2.39144	3.31409e-13		ENSMUSG00000027313	Chac1	0	0.395226	1.31515	0.60915		ENSMUSG00000090019	Gimap1	0	0.464204	1.37956	1
	ENSMUSG00000029060	Mib2	1	1.09486	2.13593	3.56609e-12		ENSMUSG00000031698	Mylk3	1	1.25583	2.38804	0.0223975		ENSMUSG00000116802	Gm5165	0	0.394628	1.3146	0.673308		ENSMUSG00000021222	Dcaf4	0	0.463909	1.37927	1
	ENSMUSG00000015127	Unkl	1	1.09415	2.13488	3.23277e-05		ENSMUSG00000045087	S1pr5	1	1.25462	2.38604	0.0136517		ENSMUSG00000039634	Zfp189	0	0.394502	1.31449	0.70272		ENSMUSG00000052949	Rnf157	0	0.463592	1.37897	1
	ENSMUSG00000003545	Fosb	1	1.09119	2.13049	5.58329e-06		ENSMUSG00000018927	Ccl6	1	1.25218	2.382	2.68943e-09		ENSMUSG00000047767	Atg16l2	0	0.394053	1.31408	0.405861		ENSMUSG00000017309	Cd300lg	0	0.463486	1.37887	1
	ENSMUSG00000020309	Chac2	1	1.08881	2.12699	8.54505e-05		ENSMUSG00000027360	Hdc	1	1.25213	2.38192	6.17754e-15		ENSMUSG00000033276	Stk36	0	0.393856	1.3139	0.79537		ENSMUSG00000038437	Mllt6	0	0.462017	1.37747	1
	ENSMUSG00000032487	Ptgs2	1	1.08799	2.12578	0.00133953		ENSMUSG00000076577	Igkv8-30	0	1.24858	2.37607	0.25273		ENSMUSG00000038214	Bend3	0	0.393687	1.31375	0.783227		ENSMUSG00000052234	Epx	0	0.46167	1.37713	1
	ENSMUSG00000067199	Frat1	1	1.08663	2.12377	3.1494e-13		ENSMUSG00000028680	Plk3	1	1.24812	2.37532	1.21145e-10		ENSMUSG00000081788	Gm5898	0	0.393568	1.31364	0.737358		ENSMUSG00000042286	Stab1	0	0.461192	1.37668	1
	ENSMUSG00000017737	Mmp9	1	1.08508	2.1215	5.32158e-07		ENSMUSG00000094433	Igkv5-43	1	1.24749	2.37428	0.0451056		ENSMUSG00000033526	Ppip5k1	0	0.393262	1.31336	0.466591		ENSMUSG00000032915	Adgre4	0	0.46084	1.37634	0.772104
	ENSMUSG00000022235	Cmbl	1	1.08493	2.12128	0.0427507		ENSMUSG00000032470	Mras	1	1.24712	2.37366	0.00801256		ENSMUSG00000027371	Fahd2a	0	0.39322	1.31332	0.718054		ENSMUSG00000020010	Vnn3	0	0.458772	1.37437	0.84355
	ENSMUSG00000011263	Exoc3l2	1	1.07787	2.11092	0.0279134		ENSMUSG00000037827	Gm5884	1	1.24663	2.37286	0.0452173		ENSMUSG00000013275	Slc41a1	0	0.39307	1.31318	0.754894		ENSMUSG00000048442	Smim5	0	0.45825	1.37387	0.397382
	ENSMUSG00000029923	Rab19	1	1.07689	2.10948	5.0924e-05		ENSMUSG00000002985	Apoe	1	1.2466	2.37282	3.86658e-11		ENSMUSG00000032323	Cyp11a1	0	0.392673	1.31282	0.699041		ENSMUSG00000018102	Hist1h2bc	0	0.457256	1.37293	0.622124
	ENSMUSG00000028982	Slc25a33	1	1.07629	2.10861	0.00663632		ENSMUSG00000060600	Eno3	1	1.24605	2.37192	1.39448e-06		ENSMUSG00000113204	Gm46430	0	0.391039	1.31134	0.682825		ENSMUSG00000022416	Cacna1i	0	0.456511	1.37222	1
	ENSMUSG00000063160	Numbl	1	1.06791	2.09639	0.00163153		ENSMUSG00000116097	Gm36738	1	1.24062	2.363	4.66128e-05		ENSMUSG00000022755	Adgrg7	0	0.390606	1.31094	0.657974		ENSMUSG00000117145	AC170998.1	0	0.456505	1.37221	1
	ENSMUSG00000040659	Efhd2	1	1.06769	2.09607	1.39732e-21		ENSMUSG00000059089	Fcgr4	1	1.24047	2.36276	2.24706e-12		ENSMUSG00000063286	Gm8995	0	0.390042	1.31043	0.488183		ENSMUSG00000035547	Capn5	0	0.456411	1.37212	1
	ENSMUSG00000073468	Sft2d1	1	1.06532	2.09263	0.00138528		ENSMUSG00000005360	Slc1a3	1	1.23658	2.35639	0.0145629		ENSMUSG00000000791	Il12rb1	0	0.390029	1.31042	0.792982		ENSMUSG00000003420	Fcgrt	0	0.454861	1.37065	1
	ENSMUSG00000097779	4833407H14Rik	1	1.06495	2.09209	9.90534e-05		ENSMUSG00000008845	Cd163	1	1.23603	2.35549	0.000678415		ENSMUSG00000030787	Lyve1	0	0.389403	1.30985	0.59358		ENSMUSG00000029925	Tbxas1	0	0.453887	1.36973	0.527341
	ENSMUSG00000044501	Zfp758	1	1.06494	2.09208	9.0067e-07		ENSMUSG00000033577	Myo6	1	1.23598	2.35541	0.000135788		ENSMUSG00000020718	Polg2	0	0.389343	1.3098	0.674081		ENSMUSG00000079505	Gm11131	0	0.453669	1.36952	1
	ENSMUSG00000046721	Rpl14-ps1	0	1.05965	2.08443	0.296204		ENSMUSG00000097589	Dleu2	1	1.22991	2.34552	1.69526e-12		ENSMUSG00000030410	Dmwd	0	0.389329	1.30978	0.563981		ENSMUSG00000022099	Dmtn	0	0.453186	1.36906	1
	ENSMUSG00000068264	Ap5s1	1	1.05743	2.08122	0.000498556		ENSMUSG00000027506	Tpd52	1	1.2288	2.34372	6.27725e-24		ENSMUSG00000063234	Gpr84	0	0.388885	1.30938	0.368565		ENSMUSG00000042401	Crtac1	0	0.452821	1.36871	1
	ENSMUSG00000042367	Gjb3	1	1.05518	2.07798	0.00585224		ENSMUSG00000039899	Fgl2	1	1.22691	2.34065	1.23862e-14		ENSMUSG00000033149	Phldb2	0	0.388348	1.30889	0.739086		ENSMUSG00000040435	Ppp1r15a	0	0.452611	1.36851	1
	ENSMUSG00000071489	Ptgdr	1	1.0518	2.07311	0.0161261		ENSMUSG00000059305	Vpreb1	1	1.22494	2.33746	0.0101689		ENSMUSG00000040446	Rprd1a	0	0.38745	1.30808	0.618123		ENSMUSG00000092305	Prps1l1	0	0.452361	1.36828	1
	ENSMUSG00000032420	Nt5e	1	1.05068	2.07151	4.15232e-07		ENSMUSG00000034765	Dusp5	1	1.22462	2.33695	6.84303e-09		ENSMUSG00000059772	Slx1b	0	0.38624	1.30698	0.671331		ENSMUSG00000063160	Numbl	0	0.451903	1.36784	1
	ENSMUSG00000076613	Ighg2b	0	1.04621	2.0651	0.0737879		ENSMUSG00000021453	Gadd45g	1	1.22119	2.33138	0.000570488		ENSMUSG00000032842	Abcc10	0	0.385755	1.30654	0.67009		ENSMUSG00000022353	Mtss1	0	0.451712	1.36766	1
	ENSMUSG00000034613	Ppm1h	1	1.04486	2.06317	3.74624e-12		ENSMUSG00000025916	Ppp1r42	1	1.21874	2.32743	5.4513e-07		ENSMUSG00000025473	Adam8	0	0.385475	1.30629	0.504101		ENSMUSG00000066877	Nck2	0	0.451141	1.36712	1
	ENSMUSG00000078783	Gm9733	1	1.04478	2.06306	4.0329e-07		ENSMUSG00000026548	Slamf9	1	1.21578	2.32267	0.00333353		ENSMUSG00000028278	Rragd	0	0.385272	1.30611	0.664519		ENSMUSG00000028565	Nfia	0	0.451091	1.36707	1
	ENSMUSG00000025492	Ifitm3	1	1.04174	2.05871	1.16633e-10		ENSMUSG00000006345	Ggt1	1	1.21502	2.32145	2.27512e-05		ENSMUSG00000017009	Sdc4	0	0.384964	1.30583	0.610889		ENSMUSG00000106019	Gm43672	0	0.450844	1.36684	0.745441
	ENSMUSG00000044566	Cage1	1	1.04141	2.05824	0.006368		ENSMUSG00000080921	Rpl38-ps2	0	1.21474	2.321	0.0803957		ENSMUSG00000071757	Zhx2	0	0.384942	1.30581	0.5098		ENSMUSG00000060519	Tor3a	0	0.450706	1.36671	0.594611
	ENSMUSG00000026504	Sdccag8	1	1.04108	2.05776	3.87847e-10		ENSMUSG00000023349	Clec4n	1	1.21421	2.32013	0.00115964		ENSMUSG00000107092	Gm7993	0	0.38341	1.30442	0.887339		ENSMUSG00000098814	Igkv19-93	0	0.449521	1.36559	1
	ENSMUSG00000043286	Pnpla1	1	1.04052	2.05697	4.51901e-05		ENSMUSG00000067365	Tmem128	1	1.21279	2.31786	1.96267e-10		ENSMUSG00000000686	Abhd15	0	0.383119	1.30416	0.509743		ENSMUSG00000024511	Rab27b	0	0.448696	1.36481	1
	ENSMUSG00000029185	Fam114a1	1	1.04027	2.05662	8.53808e-08		ENSMUSG00000021792	Fam213a	1	1.2083	2.31066	0.00637958		ENSMUSG00000031616	Ednra	0	0.382711	1.30379	0.658245		ENSMUSG00000028528	Dnajc6	0	0.448136	1.36428	1
	ENSMUSG00000021108	Prkch	1	1.03069	2.043	0.00445992		ENSMUSG00000038776	Ephx1	1	1.20318	2.30247	0.000345516		ENSMUSG00000046079	Lrrc8d	0	0.381552	1.30274	0.181607		ENSMUSG00000102512	Ighv1-29	0	0.448079	1.36422	1
	ENSMUSG00000090439	Gm17455	1	1.03036	2.04254	0.0244697		ENSMUSG00000022193	Psmb5	1	1.20228	2.30103	3.71289e-17		ENSMUSG00000072919	Noxred1	0	0.381196	1.30242	0.704212		ENSMUSG00000046748	Tmem45a2	0	0.447526	1.3637	0.743167
	ENSMUSG00000028730	Cfap57	1	1.02905	2.04068	0.00361957		ENSMUSG00000059657	Stfa2l1	1	1.20227	2.30102	5.24869e-06		ENSMUSG00000054381	Zfp747	0	0.380834	1.30209	0.690795		ENSMUSG00000090625	Gm20721	0	0.44743	1.36361	1
	ENSMUSG00000044562	Rasip1	1	1.02898	2.04059	0.000929921		ENSMUSG00000111378	Gm47230	1	1.20128	2.29943	0.00160101		ENSMUSG00000024855	Pacs1	0	0.378877	1.30033	0.371257		ENSMUSG00000027636	Sla2	0	0.447273	1.36346	1
	ENSMUSG00000039886	Tmem120a	1	1.02889	2.04046	1.94117e-10		ENSMUSG00000044562	Rasip1	1	1.19991	2.29725	5.60861e-05		ENSMUSG00000059273	Zc3h4	0	0.378828	1.30029	0.297857		ENSMUSG00000109715	Gm45606	0	0.447062	1.36326	1
	ENSMUSG00000027219	Slc28a2	1	1.02598	2.03634	3.18935e-15		ENSMUSG00000032018	Sc5d	1	1.19913	2.29601	1.18812e-08		ENSMUSG00000064105	Cnnm2	0	0.378654	1.30013	0.680728		ENSMUSG00000095497	Igkv1-122	0	0.447057	1.36326	1
	ENSMUSG00000004730	Adgre1	1	1.0258	2.03608	4.76063e-08		ENSMUSG00000055407	Map6	1	1.19819	2.29451	0.00150828		ENSMUSG00000070639	Lrrc8b	0	0.378409	1.29991	0.789775		ENSMUSG00000042474	Fcmr	0	0.446826	1.36304	1
	ENSMUSG00000027236	Eif3j1	1	1.02323	2.03247	1.01948e-06		ENSMUSG00000020490	Btnl10	1	1.19794	2.29412	0.0337683		ENSMUSG00000032596	Uba7	0	0.378183	1.2997	0.330018		ENSMUSG00000076934	Iglv1	0	0.446712	1.36293	1
	ENSMUSG00000060600	Eno3	1	1.02187	2.03055	0.000221104		ENSMUSG00000056531	Ccdc18	1	1.19724	2.293	0.0178467		ENSMUSG00000053835	H2-T24	0	0.378008	1.29955	0.466591		ENSMUSG00000046456	Tmem150b	0	0.446251	1.3625	1
	ENSMUSG00000015947	Fcgr1	1	1.01883	2.02628	0.00220724		ENSMUSG00000030144	Clec4d	1	1.19607	2.29114	1.45166e-05		ENSMUSG00000051238	Swsap1	0	0.377563	1.29915	0.605816		ENSMUSG00000039450	Dcxr	0	0.445285	1.36158	1
	ENSMUSG00000071203	Naip5	1	1.01626	2.02267	5.0924e-05		ENSMUSG00000023274	Cd4	1	1.19386	2.28764	0.000125166		ENSMUSG00000034917	Tjp3	0	0.377275	1.29889	0.542555		ENSMUSG00000096982	Redrum	0	0.445219	1.36152	1
	ENSMUSG00000073987	Ggh	1	1.0158	2.02202	1.40172e-08		ENSMUSG00000024079	Eif2ak2	1	1.19195	2.28462	6.17822e-19		ENSMUSG00000035236	Scai	0	0.376583	1.29826	0.774648		ENSMUSG00000018417	Myo1b	0	0.445116	1.36142	1
	ENSMUSG00000020077	Srgn	1	1.01433	2.01997	6.54983e-12		ENSMUSG00000029570	Lfng	1	1.1918	2.28437	4.82509e-20		ENSMUSG00000032011	Thy1	0	0.376454	1.29815	0.687666		ENSMUSG00000030329	Pianp	0	0.444934	1.36125	1
	ENSMUSG00000022564	Grina	1	1.01316	2.01833	2.91985e-08		ENSMUSG00000064225	Paqr9	1	1.1916	2.28405	0.0102884		ENSMUSG00000032776	Mctp2	0	0.376081	1.29781	0.509743		ENSMUSG00000070873	Lilra5	0	0.442828	1.35927	1
	ENSMUSG00000033577	Myo6	1	1.01305	2.01817	0.00320346		ENSMUSG00000085213	Gm13091	1	1.18872	2.27951	0.00249458		ENSMUSG00000068227	Il2rb	0	0.375732	1.2975	0.756904		ENSMUSG00000033713	Foxn3	0	0.44229	1.35876	0.743167
	ENSMUSG00000091955	Gm9844	1	1.01224	2.01704	0.000212914		ENSMUSG00000041777	Cir1	1	1.18757	2.27769	6.70921e-10		ENSMUSG00000056234	Ncoa4	0	0.375533	1.29732	0.459159		ENSMUSG00000022014	Epsti1	0	0.442134	1.35861	0.246942
	ENSMUSG00000052688	Rab7b	0	1.01215	2.01691	0.0740353		ENSMUSG00000046031	Calhm6	1	1.18718	2.27707	0.00188211		ENSMUSG00000015846	Rxra	0	0.375194	1.29701	0.579562		ENSMUSG00000042831	Alkbh6	0	0.442004	1.35849	1
	ENSMUSG00000001128	Cfp	1	1.01155	2.01608	6.19022e-10		ENSMUSG00000053769	Lysmd1	1	1.1846	2.273	0.000252488		ENSMUSG00000020573	Pik3cg	0	0.375104	1.29693	0.307307		ENSMUSG00000026142	Rhbdd1	0	0.441838	1.35833	0.167
	ENSMUSG00000052446	Zfp961	1	1.01046	2.01455	8.58264e-05		ENSMUSG00000033467	Crlf2	1	1.18438	2.27266	5.39367e-16		ENSMUSG00000001065	Zfp276	0	0.3751	1.29693	0.440274		ENSMUSG00000021461	Fancc	0	0.441614	1.35812	1
	ENSMUSG00000071724	Smpd5	1	1.00975	2.01356	0.00389819		ENSMUSG00000058163	Gm5431	1	1.1832	2.2708	0.0123922		ENSMUSG00000005339	Fcer1a	0	0.374461	1.29636	0.712139		ENSMUSG00000048534	Jaml	0	0.44124	1.35777	0.788849
	ENSMUSG00000104291	A130071D04Rik	1	1.0095	2.01321	0.012321		ENSMUSG00000030064	Frmd4b	1	1.18311	2.27066	0.00063768		ENSMUSG00000049608	Gpr55	0	0.374147	1.29607	0.813102		ENSMUSG00000015942	Gtf2ird2	0	0.441189	1.35772	0.772104
	ENSMUSG00000033467	Crlf2	1	1.00671	2.00933	5.4269e-11		ENSMUSG00000020053	Igf1	1	1.18191	2.26878	0.00104882		ENSMUSG00000053716	Dusp7	0	0.373021	1.29506	0.561797		ENSMUSG00000049176	Frmpd4	0	0.440764	1.35732	1
	ENSMUSG00000038267	Slc22a23	0	1.0066	2.00917	0.0579893		ENSMUSG00000111167	Gm39321	1	1.18187	2.26871	7.68389e-10		ENSMUSG00000027368	Dusp2	0	0.372837	1.2949	0.749273		ENSMUSG00000050212	Eva1b	0	0.440416	1.357	1
	ENSMUSG00000054342	Kcnn4	1	1.00607	2.00843	0.00820829		ENSMUSG00000097514	Gm17619	1	1.18012	2.26595	0.000434023		ENSMUSG00000027340	Slc23a2	0	0.372771	1.29484	0.582693		ENSMUSG00000031503	Col4a2	0	0.439349	1.35599	1
	ENSMUSG00000115338	Pnp	1	1.00531	2.00738	1.41928e-08		ENSMUSG00000078942	Naip6	1	1.17981	2.26547	0.00178533		ENSMUSG00000036053	Fmnl2	0	0.372746	1.29482	0.330018		ENSMUSG00000049422	Chchd10	0	0.439259	1.35591	1
	ENSMUSG00000030340	Scnn1a	1	1.00381	2.0053	2.25593e-07		ENSMUSG00000066621	Tecpr1	1	1.17662	2.26047	2.92654e-12		ENSMUSG00000025899	Alkbh8	0	0.372609	1.29469	0.709793		ENSMUSG00000023034	Nr4a1	0	0.439205	1.35586	0.932346
	ENSMUSG00000015839	Nfe2l2	1	1.00348	2.00483	9.04136e-22		ENSMUSG00000022901	Cd86	1	1.17516	2.25818	2.40009e-07		ENSMUSG00000057894	Zfp329	0	0.372336	1.29445	0.756973		ENSMUSG00000022180	Slc7a8	0	0.439074	1.35573	0.772104
	ENSMUSG00000044811	Cd300c2	1	1.00313	2.00434	2.43067e-07		ENSMUSG00000030789	Itgax	1	1.17397	2.25632	1.14287e-09		ENSMUSG00000035372	1810055G02Rik	0	0.372228	1.29435	0.28243		ENSMUSG00000035133	Arhgap5	0	0.43876	1.35544	1
	ENSMUSG00000035133	Arhgap5	1	1.00292	2.00405	0.00489424		ENSMUSG00000090439	Gm17455	1	1.17297	2.25475	0.00754821		ENSMUSG00000028634	Hivep3	0	0.372016	1.29416	0.720913		ENSMUSG00000020641	Rsad2	0	0.438714	1.3554	1
	ENSMUSG00000024778	Fas	1	1.00268	2.00372	3.97985e-05		ENSMUSG00000050954	Zfp169	1	1.1729	2.25464	0.0194189		ENSMUSG00000078853	Igtp	0	0.371821	1.29398	0.550929		ENSMUSG00000037010	Apln	0	0.437574	1.35432	1
	ENSMUSG00000035439	Haus8	1	1.00254	2.00352	2.86654e-13		ENSMUSG00000078153	Psme2b	1	1.16983	2.24985	0.00702131		ENSMUSG00000029798	Herc6	0	0.371739	1.29391	0.622696		ENSMUSG00000098973	Mir6236	0	0.436436	1.35326	1
	ENSMUSG00000115276	9930017N22Rik	0	0.999769	1.99968	0.250648		ENSMUSG00000104818	Gm43661	1	1.16789	2.24682	0.0378059		ENSMUSG00000034118	Tpst1	0	0.371709	1.29388	0.739086		ENSMUSG00000040820	Hlcs	0	0.436087	1.35293	0.40814
	ENSMUSG00000009076	Zmat5	1	0.999699	1.99958	5.39067e-06		ENSMUSG00000001158	Snrnp27	1	1.16345	2.23993	3.17783e-07		ENSMUSG00000049086	Bmyc	0	0.37124	1.29346	0.793544		ENSMUSG00000032656	March3	0	0.433087	1.35012	1
	ENSMUSG00000116564	Riok2	1	0.998848	1.9984	3.1079e-05		ENSMUSG00000051839	Gypa	1	1.16313	2.23942	0.0146535		ENSMUSG00000037762	Slc16a9	0	0.370883	1.29314	0.79537		ENSMUSG00000050965	Prkca	0	0.433067	1.3501	1
	ENSMUSG00000043004	Gng2	1	0.997777	1.99692	6.00052e-09		ENSMUSG00000037771	Slc32a1	1	1.16292	2.2391	0.00814254		ENSMUSG00000026933	Camsap1	0	0.370189	1.29252	0.674081		ENSMUSG00000022037	Clu	0	0.432712	1.34977	1
	ENSMUSG00000029474	Rnf34	1	0.995669	1.994	3.30726e-10		ENSMUSG00000020309	Chac2	1	1.16072	2.23569	1.02048e-05		ENSMUSG00000027580	Helz2	0	0.369687	1.29207	0.563657		ENSMUSG00000020393	Kremen1	0	0.43207	1.34917	1
	ENSMUSG00000079523	Tmsb10	1	0.993275	1.9907	2.06422e-06		ENSMUSG00000020077	Srgn	1	1.15968	2.23408	1.80186e-16		ENSMUSG00000039530	Tusc3	0	0.368999	1.29146	0.742761		ENSMUSG00000056399	Prss34	0	0.431413	1.34855	1
	ENSMUSG00000029392	Rilpl1	1	0.989374	1.98532	0.00881667		ENSMUSG00000022235	Cmbl	1	1.15938	2.23361	0.017953		ENSMUSG00000055334	Snupn	0	0.368579	1.29108	0.738602		ENSMUSG00000018474	Chd3	0	0.430952	1.34812	1
	ENSMUSG00000021614	Vcan	0	0.988831	1.98458	0.397736		ENSMUSG00000015243	Abca1	1	1.15859	2.2324	0.000113453		ENSMUSG00000044701	Il27	0	0.368497	1.29101	0.725836		ENSMUSG00000056459	Zbtb25	0	0.430669	1.34786	1
	ENSMUSG00000022359	Wdyhv1	1	0.988818	1.98456	4.18224e-07		ENSMUSG00000001270	Ckb	1	1.15829	2.23192	9.61533e-05		ENSMUSG00000036587	Fut7	0	0.367836	1.29042	0.454202		ENSMUSG00000028681	Ptch2	0	0.429464	1.34673	1
	ENSMUSG00000041329	Atp1b2	1	0.986487	1.98135	0.046685		ENSMUSG00000036905	C1qb	1	1.15587	2.22818	1.38902e-06		ENSMUSG00000032376	Usp3	0	0.367778	1.29036	0.387737		ENSMUSG00000015053	Gata2	0	0.429174	1.34646	1
	ENSMUSG00000033157	Abhd10	1	0.983779	1.97764	2.26554e-07		ENSMUSG00000034674	Tdg	1	1.15353	2.22458	2.24431e-18		ENSMUSG00000022799	Arhgap31	0	0.367598	1.2902	0.366536		ENSMUSG00000021767	Kat6b	0	0.429085	1.34638	0.743167
	ENSMUSG00000051483	Cbr1	1	0.981927	1.9751	0.00805477		ENSMUSG00000037847	Nmrk1	1	1.15328	2.22419	0.000475909		ENSMUSG00000025780	Itih5	0	0.367532	1.29014	0.451199		ENSMUSG00000057137	Tmem140	0	0.428704	1.34602	1
	ENSMUSG00000090266	Mettl23	1	0.981439	1.97443	3.03813e-05		ENSMUSG00000019990	Pde7b	1	1.15217	2.22248	0.0248061		ENSMUSG00000038524	Fchsd1	0	0.367341	1.28997	0.572354		ENSMUSG00000020623	Map2k6	0	0.428538	1.34587	1
	ENSMUSG00000025790	Slco3a1	1	0.979692	1.97204	7.02406e-09		ENSMUSG00000003585	Sec14l2	0	1.15087	2.22047	0.0793611		ENSMUSG00000033594	Spata2l	0	0.366739	1.28943	0.620216		ENSMUSG00000057315	Arhgap24	0	0.428299	1.34565	1
	ENSMUSG00000015854	Cd5l	1	0.979672	1.97202	0.0246456		ENSMUSG00000060044	Tmem26	1	1.15055	2.21998	0.00611326		ENSMUSG00000019464	Ptger1	0	0.36618	1.28894	0.773924		ENSMUSG00000102151	Gm37472	0	0.428119	1.34548	1
	ENSMUSG00000029992	Gfpt1	1	0.979608	1.97193	4.24981e-11		ENSMUSG00000026504	Sdccag8	1	1.14969	2.21866	5.19543e-13		ENSMUSG00000073902	Gm1966	0	0.366095	1.28886	0.557936		ENSMUSG00000002625	Akap8l	0	0.427547	1.34494	0.746762
	ENSMUSG00000084350	Znf41-ps	1	0.978932	1.97101	0.0185513		ENSMUSG00000074024	4632427E13Rik	1	1.14953	2.21841	0.0165576		ENSMUSG00000037509	Arhgef4	0	0.364908	1.2878	0.563657		ENSMUSG00000052684	Jun	0	0.426761	1.34421	0.951014
	ENSMUSG00000060802	B2m	1	0.976862	1.96818	1.73146e-12		ENSMUSG00000030069	Prok2	1	1.14929	2.21804	9.11336e-06		ENSMUSG00000057069	Ero1lb	0	0.364904	1.2878	0.519719		ENSMUSG00000029608	Rph3a	0	0.426513	1.34398	1
	ENSMUSG00000040631	Dok4	1	0.975789	1.96672	0.00893387		ENSMUSG00000037525	Bcdin3d	1	1.14924	2.21797	5.3422e-08		ENSMUSG00000020682	Mmp28	0	0.364714	1.28763	0.760294		ENSMUSG00000060548	Tnfrsf19	0	0.425218	1.34278	1
	ENSMUSG00000038141	Tmem181a	1	0.974854	1.96544	0.000896931		ENSMUSG00000034880	Mrpl34	1	1.1481	2.21622	1.06759e-14		ENSMUSG00000091623	Gm17092	0	0.363964	1.28696	0.786327		ENSMUSG00000042817	Flt3	0	0.424848	1.34243	1
	ENSMUSG00000046245	Pilra	1	0.974381	1.9648	2.9857e-08		ENSMUSG00000002108	Nr1h3	1	1.14713	2.21472	0.00867779		ENSMUSG00000014850	Msh3	0	0.363808	1.28682	0.706293		ENSMUSG00000067714	Lpar5	0	0.424656	1.34225	1
	ENSMUSG00000033356	Pus7l	1	0.973087	1.96304	0.0217218		ENSMUSG00000033355	Rtp4	1	1.147	2.21454	0.000246053		ENSMUSG00000034160	Ogt	0	0.363254	1.28632	0.504147		ENSMUSG00000039163	Cmc1	0	0.424113	1.34175	1
	ENSMUSG00000045464	2810002D19Rik	1	0.972016	1.96158	0.00106005		ENSMUSG00000037683	Armc3	1	1.14305	2.20848	7.05457e-05		ENSMUSG00000062007	Hsh2d	0	0.362897	1.28601	0.497897		ENSMUSG00000071226	Cecr2	0	0.42396	1.34161	1
	ENSMUSG00000046031	Calhm6	1	0.971919	1.96145	0.018322		ENSMUSG00000006344	Ggt5	1	1.14282	2.20812	3.57651e-10		ENSMUSG00000050989	Selenon	0	0.362675	1.28581	0.40929		ENSMUSG00000020941	Map3k14	0	0.423362	1.34105	1
	ENSMUSG00000061232	H2-K1	1	0.971228	1.96051	8.55575e-11		ENSMUSG00000074656	Eif2s2	1	1.14274	2.208	1.46567e-08		ENSMUSG00000110277	Gm45871	0	0.362669	1.2858	0.720913		ENSMUSG00000001270	Ckb	0	0.423191	1.34089	1
	ENSMUSG00000022425	Enpp2	1	0.971146	1.9604	0.0423237		ENSMUSG00000043873	Chil5	1	1.14271	2.20796	3.57338e-09		ENSMUSG00000052760	A630001G21Rik	0	0.362399	1.28556	0.509743		ENSMUSG00000039763	Dnajc28	0	0.423178	1.34088	1
	ENSMUSG00000021728	Emb	1	0.970656	1.95973	6.42289e-10		ENSMUSG00000032712	Resf1	1	1.14271	2.20796	1.60579e-07		ENSMUSG00000060012	Kif13b	0	0.362325	1.2855	0.254328		ENSMUSG00000079293	Clec7a	0	0.422453	1.3402	0.566988
	ENSMUSG00000068566	Myadm	1	0.968955	1.95742	1.09064e-11		ENSMUSG00000053617	Sh3pxd2a	1	1.14104	2.2054	0.00103111		ENSMUSG00000026924	Sec16a	0	0.362269	1.28545	0.343741		ENSMUSG00000113010	Gm34084	0	0.422119	1.33989	1
	ENSMUSG00000041481	Serpina3g	1	0.967887	1.95597	0.0211705		ENSMUSG00000040616	Tmem51	1	1.14086	2.20512	5.75834e-06		ENSMUSG00000023249	Parp3	0	0.361858	1.28508	0.578023		ENSMUSG00000048078	Tenm4	0	0.421609	1.33942	1
	ENSMUSG00000029648	Flt1	0	0.967786	1.95584	0.0918111		ENSMUSG00000060260	Pwwp2b	1	1.14045	2.20449	1.73971e-05		ENSMUSG00000117679	Apbb3	0	0.361431	1.2847	0.760294		ENSMUSG00000026458	Ppfia4	0	0.421213	1.33905	0.91376
	ENSMUSG00000074677	Sirpb1c	1	0.965976	1.95338	3.59893e-07		ENSMUSG00000004730	Adgre1	1	1.1376	2.20015	2.04876e-10		ENSMUSG00000028108	Ecm1	0	0.361253	1.28454	0.758859		ENSMUSG00000052837	Junb	0	0.420783	1.33865	0.772104
	ENSMUSG00000000489	Pdgfb	0	0.965342	1.95253	0.0966401		ENSMUSG00000037966	Ninj1	1	1.13607	2.19782	7.3886e-09		ENSMUSG00000045502	Hcar2	0	0.361095	1.2844	0.666808		ENSMUSG00000024044	Epb41l3	0	0.42001	1.33794	1
	ENSMUSG00000026837	Col5a1	1	0.964135	1.95089	9.21119e-05		ENSMUSG00000010608	Rbm25	1	1.1336	2.19406	3.11356e-06		ENSMUSG00000061079	Zfp143	0	0.361006	1.28432	0.477442		ENSMUSG00000020023	Tmcc3	0	0.419862	1.3378	0.962053
	ENSMUSG00000094420	Igkv10-96	0	0.963331	1.94981	0.121979		ENSMUSG00000058056	Palld	1	1.13327	2.19356	0.0213824		ENSMUSG00000030051	Aplf	0	0.36099	1.28431	0.582693		ENSMUSG00000082820	Gm13803	0	0.418842	1.33685	1
	ENSMUSG00000002797	Ggct	1	0.962539	1.94874	0.000751188		ENSMUSG00000043923	Ccdc84	1	1.1307	2.18965	9.89066e-05		ENSMUSG00000066861	Oas1g	0	0.360006	1.28343	0.743351		ENSMUSG00000022885	St6gal1	0	0.418777	1.33679	1
	ENSMUSG00000018774	Cd68	1	0.961046	1.94672	9.90288e-09		ENSMUSG00000003418	St8sia6	1	1.12931	2.18754	0.0106724		ENSMUSG00000027514	Zbp1	0	0.359918	1.28335	0.602051		ENSMUSG00000071076	Jund	0	0.41823	1.33629	0.627346
	ENSMUSG00000060149	BC002059	1	0.959808	1.94505	0.010444		ENSMUSG00000042367	Gjb3	1	1.12922	2.1874	0.00175444		ENSMUSG00000074829	2010315B03Rik	0	0.359867	1.28331	0.739139		ENSMUSG00000038775	Vill	0	0.418002	1.33608	1
	ENSMUSG00000053113	Socs3	1	0.956864	1.94109	0.000758813		ENSMUSG00000028756	Pink1	1	1.12751	2.18481	5.20283e-08		ENSMUSG00000036959	Bcorl1	0	0.359779	1.28323	0.523163		ENSMUSG00000023216	Epb42	0	0.417899	1.33598	1
	ENSMUSG00000028268	Gbp3	1	0.955407	1.93913	0.00117341		ENSMUSG00000113701	B230303A05Rik	1	1.1273	2.1845	2.37026e-09		ENSMUSG00000035929	H2-Q4	0	0.359548	1.28302	0.32471		ENSMUSG00000021904	Sema3g	0	0.416532	1.33472	1
	ENSMUSG00000059277	R74862	1	0.95496	1.93853	0.0245543		ENSMUSG00000058818	Pirb	1	1.12644	2.18319	1.44277e-18		ENSMUSG00000104213	Ighd	0	0.359137	1.28266	0.825813		ENSMUSG00000117924	Tmem223	0	0.416054	1.33427	0.811886
	ENSMUSG00000100199	Gm20324	0	0.95371	1.93685	0.058504		ENSMUSG00000029482	Aacs	1	1.12444	2.18017	1.543e-13		ENSMUSG00000044562	Rasip1	0	0.358496	1.28209	0.674081		ENSMUSG00000038421	Fcrla	0	0.415108	1.3334	1
	ENSMUSG00000029470	P2rx4	1	0.951693	1.93414	5.7218e-05		ENSMUSG00000039191	Rbpj	1	1.12333	2.17849	1.84767e-17		ENSMUSG00000027878	Notch2	0	0.358221	1.28184	0.48715		ENSMUSG00000037972	Snn	0	0.415019	1.33332	1
	ENSMUSG00000063524	Eno1	1	0.950504	1.93255	3.01294e-11		ENSMUSG00000073400	Trim10	1	1.12322	2.17832	0.0237147		ENSMUSG00000033450	Tagap	0	0.35805	1.28169	0.459605		ENSMUSG00000034462	Pkd2	0	0.414541	1.33287	1
	ENSMUSG00000050666	Vstm4	0	0.948882	1.93038	0.157466		ENSMUSG00000006574	Slc4a1	1	1.12305	2.17807	0.0209803		ENSMUSG00000029408	Abcb9	0	0.357963	1.28162	0.471825		ENSMUSG00000032333	Stoml1	0	0.412699	1.33117	1
	ENSMUSG00000032715	Trib3	1	0.947562	1.92861	0.032884		ENSMUSG00000067199	Frat1	1	1.12173	2.17608	1.08068e-14		ENSMUSG00000039523	Cep104	0	0.357866	1.28153	0.466591		ENSMUSG00000043415	Otud1	0	0.411917	1.33045	1
	ENSMUSG00000040483	Xaf1	1	0.947043	1.92792	0.00502554		ENSMUSG00000030276	Ttll3	1	1.11782	2.17018	0.000714806		ENSMUSG00000037750	Fam222b	0	0.356871	1.28064	0.319151		ENSMUSG00000007039	Ddah2	0	0.41126	1.32985	1
	ENSMUSG00000027488	Snta1	1	0.946495	1.92718	0.0132965		ENSMUSG00000078783	Gm9733	1	1.11655	2.16828	1.431e-08		ENSMUSG00000100199	Gm20324	0	0.356495	1.28031	0.79537		ENSMUSG00000034171	Faah	0	0.411035	1.32964	1
	ENSMUSG00000033256	Shf	0	0.945203	1.92546	0.0671521		ENSMUSG00000110275	Gm5905	1	1.11558	2.16682	0.00194385		ENSMUSG00000041329	Atp1b2	0	0.356448	1.28027	0.79537		ENSMUSG00000039853	Trim14	0	0.410828	1.32945	0.950082
	ENSMUSG00000053617	Sh3pxd2a	1	0.944825	1.92496	0.0122839		ENSMUSG00000032715	Trib3	1	1.11483	2.16569	0.00734162		ENSMUSG00000027784	Ppm1l	0	0.355976	1.27985	0.727014		ENSMUSG00000034930	Rtkn	0	0.410738	1.32937	1
	ENSMUSG00000078495	Zfp984	1	0.943865	1.92367	4.00724e-08		ENSMUSG00000073492	Gm10521	1	1.11333	2.16345	0.00400351		ENSMUSG00000039477	Tnrc18	0	0.355947	1.27983	0.371257		ENSMUSG00000111521	Gm48529	0	0.408459	1.32727	1
	ENSMUSG00000059498	Fcgr3	1	0.943695	1.92345	1.02006e-08		ENSMUSG00000091649	Phf11b	1	1.11266	2.16244	0.017745		ENSMUSG00000014453	Blk	0	0.354909	1.2789	0.795457		ENSMUSG00000032380	Dapk2	0	0.408361	1.32718	0.610412
	ENSMUSG00000032204	Aqp9	1	0.943315	1.92294	2.87131e-06		ENSMUSG00000078566	Bnip3	1	1.11172	2.16103	1.97877e-14		ENSMUSG00000043683	Fem1a	0	0.354128	1.27821	0.371257		ENSMUSG00000013236	Ptprs	0	0.4078	1.32666	1
	ENSMUSG00000018858	Mrpl58	1	0.943211	1.9228	4.68893e-07		ENSMUSG00000015854	Cd5l	1	1.11099	2.15993	0.00584597		ENSMUSG00000043183	Simc1	0	0.35339	1.27756	0.7858		ENSMUSG00000014245	Pigl	0	0.406712	1.32566	0.91376
	ENSMUSG00000024081	Cebpz	1	0.942281	1.92156	5.7412e-07		ENSMUSG00000029642	Polr1d	1	1.11088	2.15977	3.18321e-14		ENSMUSG00000054942	Miga1	0	0.353388	1.27756	0.791357		ENSMUSG00000018168	Ikzf3	0	0.406687	1.32564	1
	ENSMUSG00000002227	Mov10	1	0.941577	1.92063	5.42899e-05		ENSMUSG00000022817	Itgb5	1	1.11069	2.15948	8.09105e-08		ENSMUSG00000089942	Pira2	0	0.353374	1.27754	0.558713		ENSMUSG00000021262	Evl	0	0.406633	1.32559	1
	ENSMUSG00000073421	H2-Ab1	1	0.941015	1.91988	0.00112573		ENSMUSG00000039264	Gimap3	1	1.11037	2.15902	0.0475577		ENSMUSG00000075370	Igll1	0	0.353313	1.27749	0.760294		ENSMUSG00000101585	1600010M07Rik	0	0.406126	1.32512	1
	ENSMUSG00000033594	Spata2l	1	0.937296	1.91494	0.000783898		ENSMUSG00000054169	Ceacam10	1	1.10982	2.15818	5.7403e-10		ENSMUSG00000061086	Myl4	0	0.353219	1.27741	0.760294		ENSMUSG00000025920	Stau2	0	0.406039	1.32504	1
	ENSMUSG00000030793	Pycard	1	0.937267	1.9149	9.19712e-10		ENSMUSG00000021699	Pde4d	1	1.10982	2.15818	0.0144764		ENSMUSG00000041649	Klf8	0	0.353094	1.2773	0.82425		ENSMUSG00000027073	Prg2	0	0.405606	1.32464	1
	ENSMUSG00000057666	Gapdh	1	0.936668	1.9141	1.03684e-09		ENSMUSG00000022103	Gfra2	1	1.1087	2.15652	0.00231671		ENSMUSG00000030724	Cd19	0	0.352732	1.27698	0.738205		ENSMUSG00000024084	Qpct	0	0.404764	1.32387	1
	ENSMUSG00000020893	Per1	1	0.936517	1.9139	1.23726e-05		ENSMUSG00000054404	Slfn5	1	1.10807	2.15558	2.94051e-07		ENSMUSG00000026797	Stxbp1	0	0.352616	1.27687	0.817357		ENSMUSG00000038545	Cul7	0	0.404646	1.32376	1
	ENSMUSG00000024737	Slc15a3	1	0.936445	1.91381	1.1333e-05		ENSMUSG00000097779	4833407H14Rik	1	1.107	2.15397	1.97647e-05		ENSMUSG00000039976	Tbc1d16	0	0.352261	1.27656	0.883274		ENSMUSG00000022103	Gfra2	0	0.404003	1.32317	1
	ENSMUSG00000016194	Hsd11b1	1	0.936343	1.91367	2.34192e-13		ENSMUSG00000042616	Oscp1	1	1.10554	2.15179	6.76414e-07		ENSMUSG00000002343	Armc6	0	0.351706	1.27607	0.677498		ENSMUSG00000030577	Cd22	0	0.403862	1.32304	1
	ENSMUSG00000076514	Igkv17-121	0	0.933849	1.91037	0.21124		ENSMUSG00000087644	Gm14703	1	1.10311	2.14817	0.00139038		ENSMUSG00000055717	Slain1	0	0.351695	1.27606	0.673308		ENSMUSG00000003546	Klc4	0	0.402907	1.32217	0.632985
	ENSMUSG00000025538	Sumf2	1	0.930185	1.90552	0.0408585		ENSMUSG00000068923	Syt11	1	1.10298	2.14797	8.99228e-05		ENSMUSG00000082674	Gm11914	0	0.351683	1.27605	0.796703		ENSMUSG00000097076	Platr7	0	0.402458	1.32176	1
	ENSMUSG00000006095	Tbcb	1	0.919891	1.89197	3.75344e-10		ENSMUSG00000006356	Crip2	1	1.09671	2.13866	0.0187594		ENSMUSG00000036944	Tmem71	0	0.351576	1.27595	0.368565		ENSMUSG00000061353	Cxcl12	0	0.402401	1.32171	1
	ENSMUSG00000030142	Clec4e	1	0.919622	1.89162	1.10692e-05		ENSMUSG00000032739	Pram1	1	1.09549	2.13685	0.00268169		ENSMUSG00000062488	Ifit3b	0	0.351553	1.27593	0.773717		ENSMUSG00000087165	2010001A14Rik	0	0.401702	1.32107	1
	ENSMUSG00000001025	S100a6	1	0.91746	1.88879	0.00030624		ENSMUSG00000030745	Il21r	1	1.09536	2.13667	0.00117574		ENSMUSG00000041117	Ccdc8	0	0.351141	1.27557	0.79537		ENSMUSG00000097177	9330159M07Rik	0	0.401544	1.32092	1
	ENSMUSG00000024521	Pmaip1	1	0.916117	1.88703	0.001595		ENSMUSG00000112148	Lilrb4a	1	1.09518	2.1364	3.54656e-05		ENSMUSG00000111478	Gm18251	0	0.351112	1.27554	0.692786		ENSMUSG00000067567	Hdac8	0	0.401406	1.32079	1
	ENSMUSG00000027322	Siglec1	1	0.915943	1.8868	0.00946391		ENSMUSG00000032556	Bfsp2	1	1.09371	2.13422	0.0449923		ENSMUSG00000022836	Mylk	0	0.350308	1.27483	0.70272		ENSMUSG00000000903	Vpreb3	0	0.401093	1.32051	1
	ENSMUSG00000024334	H2-Oa	1	0.913816	1.88402	0.0493002		ENSMUSG00000053886	Sh2d4a	0	1.08815	2.12601	0.118246		ENSMUSG00000025810	Nrp1	0	0.350242	1.27477	0.303159		ENSMUSG00000027398	Il1b	0	0.400893	1.32032	1
	ENSMUSG00000032802	Srxn1	1	0.913367	1.88344	0.0288111		ENSMUSG00000117059	AC154766.1	1	1.08747	2.125	0.0057975		ENSMUSG00000021986	Amer2	0	0.350002	1.27456	0.490598		ENSMUSG00000076575	Igkv7-33	0	0.400339	1.31982	1
	ENSMUSG00000032059	Alg9	1	0.913089	1.88307	0.000133544		ENSMUSG00000039908	Slc26a11	1	1.08689	2.12416	0.00150165		ENSMUSG00000030166	Rad52	0	0.34947	1.27409	0.451199		ENSMUSG00000066687	Zbtb16	0	0.400311	1.31979	1
	ENSMUSG00000055452	Gm7353	1	0.910444	1.87962	0.0352868		ENSMUSG00000045464	2810002D19Rik	1	1.08688	2.12414	0.000107044		ENSMUSG00000113184	Gm49654	0	0.349308	1.27395	0.602051		ENSMUSG00000089809	Rasgef1b	0	0.400006	1.31951	1
	ENSMUSG00000066684	Pilrb1	1	0.907383	1.87564	9.08094e-08		ENSMUSG00000074151	Nlrc5	1	1.08481	2.1211	0.00147562		ENSMUSG00000018474	Chd3	0	0.347578	1.27242	0.638491		ENSMUSG00000033966	Cdkl4	0	0.399333	1.3189	1
	ENSMUSG00000090258	Churc1	0	0.905745	1.87351	0.114863		ENSMUSG00000055435	Maf	1	1.08002	2.11407	0.00135832		ENSMUSG00000047735	Samd9l	0	0.347258	1.27214	0.582693		ENSMUSG00000022114	Spry2	0	0.398676	1.3183	1
	ENSMUSG00000036944	Tmem71	1	0.90449	1.87188	8.06525e-10		ENSMUSG00000030556	Lrrc28	1	1.07983	2.11379	8.6829e-06		ENSMUSG00000034430	Zxdc	0	0.347206	1.27209	0.447011		ENSMUSG00000002602	Axl	0	0.397946	1.31763	1
	ENSMUSG00000001062	Vps9d1	1	0.903409	1.87048	6.56522e-07		ENSMUSG00000059336	Slc14a1	1	1.07902	2.1126	0.0131752		ENSMUSG00000059013	Sh2d3c	0	0.34712	1.27202	0.451199		ENSMUSG00000090192	Gm16556	0	0.397744	1.31745	1
	ENSMUSG00000029657	Hsph1	1	0.902094	1.86878	0.0198522		ENSMUSG00000024334	H2-Oa	1	1.07813	2.11129	0.0120148		ENSMUSG00000055652	Klhl25	0	0.346533	1.2715	0.56911		ENSMUSG00000028538	St3gal3	0	0.397709	1.31741	0.857242
	ENSMUSG00000024691	Fam111a	1	0.899254	1.8651	2.10856e-09		ENSMUSG00000080058	Gm11175	1	1.07583	2.10793	0.00110112		ENSMUSG00000021703	Serinc5	0	0.346323	1.27132	0.426162		ENSMUSG00000026628	Atf3	0	0.397149	1.3169	1
	ENSMUSG00000032018	Sc5d	1	0.897454	1.86278	8.3253e-05		ENSMUSG00000006095	Tbcb	1	1.07372	2.10486	1.75974e-14		ENSMUSG00000020401	Fam71b	0	0.346	1.27103	0.67884		ENSMUSG00000061232	H2-K1	0	0.396445	1.31626	0.36452
	ENSMUSG00000056260	Lrif1	1	0.897107	1.86233	0.00110321		ENSMUSG00000001025	S100a6	1	1.07358	2.10465	6.14806e-06		ENSMUSG00000037151	Lrrc20	0	0.345888	1.27093	0.739086		ENSMUSG00000048921	Zfp689	0	0.396268	1.3161	1
	ENSMUSG00000086119	Gm2415	1	0.896227	1.86119	0.000208543		ENSMUSG00000061232	H2-K1	1	1.07344	2.10444	6.55565e-14		ENSMUSG00000027981	Rnpc3	0	0.345754	1.27082	0.605316		ENSMUSG00000073421	H2-Ab1	0	0.395429	1.31533	1
	ENSMUSG00000044986	Tst	1	0.893962	1.85827	5.95458e-10		ENSMUSG00000062054	Iah1	1	1.0734	2.10439	2.4969e-09		ENSMUSG00000032854	Ugt8a	0	0.345713	1.27078	0.774739		ENSMUSG00000080814	Gm12314	0	0.395279	1.3152	1
	ENSMUSG00000024055	Cyp4f13	1	0.892476	1.85636	0.000666754		ENSMUSG00000021200	Asb2	1	1.06768	2.09606	0.0132028		ENSMUSG00000042423	Fbrs	0	0.34559	1.27067	0.43289		ENSMUSG00000022747	St3gal6	0	0.395071	1.31501	1
	ENSMUSG00000026994	Galnt3	1	0.890838	1.85425	2.98871e-05		ENSMUSG00000027322	Siglec1	1	1.06709	2.0952	0.00110511		ENSMUSG00000029647	Pan3	0	0.345401	1.2705	0.447011		ENSMUSG00000041025	Iffo2	0	0.394544	1.31453	1
	ENSMUSG00000068758	Il3ra	1	0.890061	1.85325	1.86475e-07		ENSMUSG00000117145	AC170998.1	1	1.06645	2.09427	0.021985		ENSMUSG00000015882	Lcorl	0	0.345258	1.27038	0.703765		ENSMUSG00000020601	Trib2	0	0.393948	1.31398	1
	ENSMUSG00000049866	Arl4c	1	0.887925	1.85051	2.75254e-05		ENSMUSG00000051397	Tacstd2	1	1.06334	2.08976	3.94981e-07		ENSMUSG00000023473	Celsr3	0	0.344964	1.27012	0.624492		ENSMUSG00000033209	Ttc28	0	0.393558	1.31363	1
	ENSMUSG00000050989	Selenon	1	0.885709	1.84767	5.08353e-08		ENSMUSG00000086119	Gm2415	1	1.06223	2.08815	3.06855e-06		ENSMUSG00000026047	Kdelc1	0	0.34402	1.26929	0.876124		ENSMUSG00000041538	H2-Ob	0	0.393512	1.31359	1
	ENSMUSG00000090272	Mndal	1	0.883805	1.84524	0.011142		ENSMUSG00000078495	Zfp984	1	1.06194	2.08773	9.14641e-11		ENSMUSG00000004552	Ctse	0	0.343954	1.26923	0.43289		ENSMUSG00000073400	Trim10	0	0.393487	1.31356	1
	ENSMUSG00000054582	Pabpc1l	1	0.882826	1.84398	0.000901598		ENSMUSG00000062691	Cebpzos	1	1.06084	2.08614	2.13502e-05		ENSMUSG00000084918	Gm12708	0	0.343864	1.26915	0.791324		ENSMUSG00000047747	Rnf150	0	0.393121	1.31323	1
	ENSMUSG00000020108	Ddit4	1	0.882624	1.84373	0.000410494		ENSMUSG00000044600	Smim7	1	1.05923	2.08382	7.93772e-15		ENSMUSG00000063320	1190007I07Rik	0	0.343781	1.26908	0.791324		ENSMUSG00000067341	H2-Eb2	0	0.392766	1.31291	1
	ENSMUSG00000078942	Naip6	1	0.882411	1.84345	0.0310476		ENSMUSG00000022635	Zcrb1	1	1.05898	2.08346	1.89447e-07		ENSMUSG00000026616	Cr2	0	0.343265	1.26862	0.867674		ENSMUSG00000032899	Styk1	0	0.392699	1.31285	1
	ENSMUSG00000027562	Car2	1	0.882404	1.84344	0.0487223		ENSMUSG00000090272	Mndal	1	1.05769	2.0816	0.00101649		ENSMUSG00000002496	Tsc2	0	0.342823	1.26824	0.441677		ENSMUSG00000037138	Aff3	0	0.39212	1.31232	1
	ENSMUSG00000076564	Igkv12-46	0	0.882229	1.84322	0.36482		ENSMUSG00000034647	Ankrd12	1	1.05707	2.0807	2.75052e-05		ENSMUSG00000018334	Ksr1	0	0.342818	1.26823	0.466591		ENSMUSG00000047867	Gimap6	0	0.391284	1.31156	1
	ENSMUSG00000030921	Trim30a	1	0.880574	1.84111	7.5028e-05		ENSMUSG00000000244	Tspan32	1	1.05528	2.07812	1.54998e-15		ENSMUSG00000024778	Fas	0	0.342012	1.26752	0.610889		ENSMUSG00000034957	Cebpa	0	0.391203	1.31149	0.0550205
	ENSMUSG00000074513	Arfip1	1	0.87981	1.84013	0.0136428		ENSMUSG00000028982	Slc25a33	1	1.05507	2.07782	0.00512311		ENSMUSG00000028080	Lrba	0	0.341181	1.26679	0.57564		ENSMUSG00000032076	Cadm1	0	0.390886	1.3112	1
	ENSMUSG00000031583	Wrn	1	0.877733	1.83749	8.09328e-11		ENSMUSG00000115869	Gm31814	1	1.05229	2.07382	0.00114215		ENSMUSG00000054675	Tmem119	0	0.340475	1.26617	0.805592		ENSMUSG00000097636	Mirt1	0	0.390873	1.31119	0.788849
	ENSMUSG00000000184	Ccnd2	1	0.877185	1.83679	0.000220621		ENSMUSG00000029545	Acads	1	1.05181	2.07313	4.97668e-08		ENSMUSG00000036698	Ago2	0	0.339447	1.26527	0.471154		ENSMUSG00000030852	Tacc2	0	0.390799	1.31112	1
	ENSMUSG00000028756	Pink1	1	0.87714	1.83673	8.01922e-05		ENSMUSG00000036111	Lmo1	1	1.05113	2.07215	2.28489e-08		ENSMUSG00000013236	Ptprs	0	0.339225	1.26508	0.770383		ENSMUSG00000027692	Tnik	0	0.390058	1.31045	1
	ENSMUSG00000038175	Mylip	1	0.87635	1.83572	2.51181e-07		ENSMUSG00000050022	Amz1	1	1.04816	2.06789	0.00516804		ENSMUSG00000054435	Gimap4	0	0.339212	1.26507	0.802295		ENSMUSG00000044340	Phlpp1	0	0.389966	1.31036	1
	ENSMUSG00000037772	Mrpl23	1	0.876248	1.83559	0.0211705		ENSMUSG00000020961	Ston2	1	1.04474	2.06299	4.7244e-05		ENSMUSG00000041775	Mapk1ip1	0	0.338801	1.2647	0.72119		ENSMUSG00000044338	Aplnr	0	0.389675	1.3101	1
	ENSMUSG00000044328	Trp53i13	1	0.874928	1.83392	0.00544675		ENSMUSG00000001552	Jup	1	1.04459	2.06278	2.34282e-09		ENSMUSG00000024066	Xdh	0	0.338663	1.26458	0.466591		ENSMUSG00000031162	Gata1	0	0.389396	1.30984	1
	ENSMUSG00000064105	Cnnm2	1	0.874092	1.83285	0.0120881		ENSMUSG00000022359	Wdyhv1	1	1.04458	2.06276	3.20772e-08		ENSMUSG00000019539	Rcn3	0	0.338396	1.26435	0.70506		ENSMUSG00000074671	Tspyl3	0	0.389241	1.3097	0.549802
	ENSMUSG00000070327	Rnf213	1	0.873695	1.83235	1.16579e-06		ENSMUSG00000029373	Pf4	1	1.04421	2.06224	0.0427013		ENSMUSG00000025078	Nhlrc2	0	0.33833	1.26429	0.490598		ENSMUSG00000042851	Zc3h6	0	0.389065	1.30954	1
	ENSMUSG00000047793	Sned1	1	0.871767	1.8299	0.0133338		ENSMUSG00000097867	Lppos	1	1.04413	2.06212	0.026874		ENSMUSG00000023044	Csad	0	0.338204	1.26418	0.563981		ENSMUSG00000118012	AC158975.2	0	0.388881	1.30938	1
	ENSMUSG00000090137	Uba52	0	0.871683	1.8298	0.0863117		ENSMUSG00000006235	Epor	1	1.04318	2.06077	0.0488042		ENSMUSG00000024273	2700062C07Rik	0	0.33792	1.26393	0.739086		ENSMUSG00000022994	Adcy6	0	0.388347	1.30889	1
	ENSMUSG00000000440	Pparg	1	0.870998	1.82893	0.00908467		ENSMUSG00000034613	Ppm1h	1	1.04183	2.05884	6.74251e-13		ENSMUSG00000030533	Unc45a	0	0.337764	1.2638	0.417829		ENSMUSG00000025328	Padi3	0	0.387983	1.30856	1
	ENSMUSG00000030671	Pde3b	1	0.870661	1.8285	0.000501402		ENSMUSG00000117284	CT030661.1	1	1.03901	2.05481	1.92545e-05		ENSMUSG00000030583	Sipa1l3	0	0.337548	1.26361	0.471825		ENSMUSG00000039007	Cpq	0	0.387605	1.30822	1
	ENSMUSG00000055675	Kbtbd11	1	0.869272	1.82674	0.0454814		ENSMUSG00000026185	Igfbp5	0	1.03805	2.05344	0.241848		ENSMUSG00000000627	Sema4f	0	0.336169	1.2624	0.447011		ENSMUSG00000021453	Gadd45g	0	0.387108	1.30777	1
	ENSMUSG00000027556	Car1	1	0.869218	1.82667	0.0411422		ENSMUSG00000034438	Gbp8	0	1.03606	2.05062	0.0522799		ENSMUSG00000042500	Ago4	0	0.335496	1.26181	0.588893		ENSMUSG00000030257	Srgap3	0	0.387014	1.30768	1
	ENSMUSG00000005986	Ankrd13d	1	0.868862	1.82622	1.67641e-05		ENSMUSG00000093402	Gm18588	0	1.03475	2.04876	0.189372		ENSMUSG00000048534	Jaml	0	0.335438	1.26176	0.59377		ENSMUSG00000016255	Tubb1	0	0.386967	1.30764	1
	ENSMUSG00000032712	Resf1	1	0.867767	1.82484	0.000239915		ENSMUSG00000032661	Oas3	1	1.03434	2.04817	0.000369783		ENSMUSG00000000538	Tom1l2	0	0.334857	1.26125	0.683849		ENSMUSG00000018750	Zbtb4	0	0.386231	1.30697	1
	ENSMUSG00000037731	Themis2	1	0.867316	1.82427	1.49707e-08		ENSMUSG00000031438	Rnf128	1	1.03359	2.04712	0.000932896		ENSMUSG00000072949	Acot1	0	0.334817	1.26122	0.735647		ENSMUSG00000021265	Slc25a29	0	0.386047	1.30681	1
	ENSMUSG00000085829	Gm4285	1	0.865085	1.82145	0.0451528		ENSMUSG00000001630	Stk38l	1	1.03353	2.04703	0.000192896		ENSMUSG00000023903	Mmp25	0	0.334592	1.26102	0.550929		ENSMUSG00000076665	Ighv7-1	0	0.385124	1.30597	1
	ENSMUSG00000037260	Hgsnat	1	0.862694	1.81843	1.33167e-10		ENSMUSG00000042066	Tmcc2	1	1.03283	2.04603	0.016926		ENSMUSG00000031539	Ap3m2	0	0.334441	1.26089	0.70272		ENSMUSG00000097287	D130017N08Rik	0	0.385049	1.3059	1
	ENSMUSG00000057143	Trim12c	1	0.860741	1.81597	1.27258e-06		ENSMUSG00000069874	Irgm2	1	1.0325	2.04556	2.16633e-06		ENSMUSG00000095079	Igha	0	0.33383	1.26036	0.779524		ENSMUSG00000040276	Pacsin1	0	0.384742	1.30563	1
	ENSMUSG00000030064	Frmd4b	1	0.857487	1.81188	0.0253424		ENSMUSG00000071256	Zfp213	1	1.03161	2.04431	4.3799e-05		ENSMUSG00000031145	Prickle3	0	0.33347	1.26004	0.538073		ENSMUSG00000094335	Igkv1-117	0	0.384418	1.30533	1
	ENSMUSG00000030556	Lrrc28	1	0.856208	1.81027	0.000962623		ENSMUSG00000040229	Gpr34	1	1.03159	2.04428	0.0181408		ENSMUSG00000036983	Tfb1m	0	0.333455	1.26003	0.850188		ENSMUSG00000037921	Ddx60	0	0.384009	1.30496	0.891009
	ENSMUSG00000029642	Polr1d	1	0.854687	1.80837	3.69608e-08		ENSMUSG00000028270	Gbp2	1	1.02517	2.0352	1.95171e-06		ENSMUSG00000032913	Lrig2	0	0.333015	1.25964	0.583373		ENSMUSG00000029059	Fam213b	0	0.382787	1.30386	1
	ENSMUSG00000040552	C3ar1	0	0.850144	1.80268	0.118066		ENSMUSG00000021061	Sptb	1	1.02344	2.03276	0.0375098		ENSMUSG00000000562	Adora3	0	0.332403	1.25911	0.715123		ENSMUSG00000033149	Phldb2	0	0.382688	1.30377	1
	ENSMUSG00000012428	Steap4	0	0.847119	1.79891	0.0564547		ENSMUSG00000073538	E330020D12Rik	0	1.02297	2.0321	0.103613		ENSMUSG00000110440	Gm45894	0	0.332023	1.25878	0.801018		ENSMUSG00000088609	Gm24187	0	0.382595	1.30368	1
	ENSMUSG00000039208	Metrnl	1	0.84604	1.79756	2.87804e-08		ENSMUSG00000032089	Il10ra	1	1.02221	2.03103	1.06855e-10		ENSMUSG00000046417	Lrrc75a	0	0.331994	1.25875	0.811619		ENSMUSG00000041375	Ccdc9	0	0.382329	1.30344	0.749802
	ENSMUSG00000036362	P2ry13	1	0.845918	1.79741	3.64051e-07		ENSMUSG00000010358	Ifi35	1	1.02203	2.03078	1.09557e-12		ENSMUSG00000026883	Dab2ip	0	0.331564	1.25838	0.447011		ENSMUSG00000027864	Ptgfrn	0	0.382249	1.30337	1
	ENSMUSG00000030704	Rab6a	1	0.845746	1.79719	5.75758e-11		ENSMUSG00000060802	B2m	1	1.02203	2.03077	1.67755e-14		ENSMUSG00000041773	Enc1	0	0.330206	1.25719	0.761291		ENSMUSG00000036322	H2-Ea-ps	0	0.381875	1.30303	1
	ENSMUSG00000092607	Scnm1	1	0.845655	1.79708	3.19162e-06		ENSMUSG00000007039	Ddah2	1	1.01959	2.02735	0.0198127		ENSMUSG00000032594	Ip6k1	0	0.330142	1.25714	0.438778		ENSMUSG00000025780	Itih5	0	0.381854	1.30302	0.743167
	ENSMUSG00000026815	Gfi1b	0	0.844652	1.79583	0.0671888		ENSMUSG00000021250	Fos	1	1.01941	2.02709	6.25989e-06		ENSMUSG00000042207	Kdm5b	0	0.330097	1.2571	0.495003		ENSMUSG00000020401	Fam71b	0	0.3814	1.30261	1
	ENSMUSG00000054404	Slfn5	1	0.844184	1.79525	0.000297967		ENSMUSG00000040093	Bmf	1	1.01775	2.02476	0.00179759		ENSMUSG00000026288	Inpp5d	0	0.329398	1.25649	0.440274		ENSMUSG00000078566	Bnip3	0	0.381306	1.30252	0.444238
	ENSMUSG00000022489	Pde1b	1	0.843128	1.79394	0.0171145		ENSMUSG00000032773	Chrm1	1	1.01769	2.02468	0.00363433		ENSMUSG00000039050	Osbpl2	0	0.329364	1.25646	0.474826		ENSMUSG00000000325	Arvcf	0	0.380682	1.30196	1
	ENSMUSG00000118071	AC166172.4	1	0.842645	1.79333	0.0428195		ENSMUSG00000033917	Gde1	1	1.01698	2.02368	4.18011e-15		ENSMUSG00000026483	Fam129a	0	0.328965	1.25611	0.447011		ENSMUSG00000073155	1810058I24Rik	0	0.380394	1.3017	0.622124
	ENSMUSG00000023992	Trem2	0	0.8411	1.79142	0.0927456		ENSMUSG00000020074	Ccar1	1	1.0146	2.02035	5.21157e-12		ENSMUSG00000093973	Mrgpra2a	0	0.328793	1.25596	0.651797		ENSMUSG00000026576	Atp1b1	0	0.380133	1.30146	1
	ENSMUSG00000039899	Fgl2	1	0.84078	1.79102	8.4342e-07		ENSMUSG00000030188	Magohb	1	1.01361	2.01896	0.00063768		ENSMUSG00000085172	Gm6542	0	0.328597	1.25579	0.950287		ENSMUSG00000037185	Krt80	0	0.379092	1.30052	0.6115
	ENSMUSG00000024413	Npc1	1	0.840717	1.79094	1.3492e-07		ENSMUSG00000087477	Gm13822	1	1.01049	2.0146	0.00936903		ENSMUSG00000037010	Apln	0	0.328595	1.25579	0.806322		ENSMUSG00000091625	Lsm5	0	0.379089	1.30052	1
	ENSMUSG00000044600	Smim7	1	0.837016	1.78635	5.22108e-09		ENSMUSG00000004626	Stxbp2	1	1.00975	2.01356	9.71246e-13		ENSMUSG00000041220	Elovl6	0	0.328542	1.25574	0.774219		ENSMUSG00000014850	Msh3	0	0.379	1.30044	1
	ENSMUSG00000027737	Slc7a11	1	0.833431	1.78192	0.0006449		ENSMUSG00000022723	Crybg3	1	1.00796	2.01106	1.81587e-06		ENSMUSG00000070327	Rnf213	0	0.328498	1.25571	0.49882		ENSMUSG00000084796	Mir142hg	0	0.378923	1.30037	0.622124
	ENSMUSG00000022701	Ccdc191	1	0.832791	1.78113	0.0227939		ENSMUSG00000001930	Vwf	0	1.00723	2.01005	0.0931484		ENSMUSG00000021182	Ccdc88c	0	0.328053	1.25532	0.465837		ENSMUSG00000024887	Asah2	0	0.378751	1.30022	1
	ENSMUSG00000032561	Acpp	1	0.830786	1.77865	1.67848e-08		ENSMUSG00000032915	Adgre4	1	1.0069	2.00959	5.24588e-06		ENSMUSG00000038705	Gmeb2	0	0.327492	1.25483	0.328703		ENSMUSG00000090665	Gad1-ps	0	0.37866	1.30013	0.772104
	ENSMUSG00000004626	Stxbp2	1	0.830563	1.77838	2.49976e-08		ENSMUSG00000022651	Retnlg	1	1.00563	2.00782	2.04063e-05		ENSMUSG00000004698	Hdac9	0	0.327159	1.25454	0.758859		ENSMUSG00000038605	Samd10	0	0.378576	1.30006	0.854372
	ENSMUSG00000020638	Cmpk2	1	0.830463	1.77826	0.000171502		ENSMUSG00000057143	Trim12c	1	1.00485	2.00674	2.48753e-09		ENSMUSG00000015944	Castor2	0	0.326602	1.25406	0.789775		ENSMUSG00000075486	Commd6	0	0.378347	1.29985	0.788849
	ENSMUSG00000041777	Cir1	1	0.829018	1.77648	7.02114e-05		ENSMUSG00000018381	Abi3	1	1.00437	2.00607	7.85363e-09		ENSMUSG00000039621	Prex1	0	0.325222	1.25286	0.43289		ENSMUSG00000031129	Slc9a9	0	0.378329	1.29984	1
	ENSMUSG00000014850	Msh3	1	0.828253	1.77553	0.0234254		ENSMUSG00000002580	Mien1	1	1.00437	2.00607	3.26717e-11		ENSMUSG00000040177	2310057M21Rik	0	0.324752	1.25245	0.700083		ENSMUSG00000034652	Cd300a	0	0.37742	1.29902	0.40814
	ENSMUSG00000024608	Rps14	1	0.827123	1.77414	7.77646e-07		ENSMUSG00000083899	Gm12346	1	1.00184	2.00255	0.0149954		ENSMUSG00000034575	Tent4a	0	0.324349	1.2521	0.723812		ENSMUSG00000097923	Gm26577	0	0.376573	1.29825	1
	ENSMUSG00000066682	Pilrb2	1	0.826638	1.77355	2.54901e-07		ENSMUSG00000035439	Haus8	1	1.00124	2.00173	4.24376e-14		ENSMUSG00000036676	Tmtc3	0	0.324309	1.25206	0.826658		ENSMUSG00000037944	Ccr7	0	0.376367	1.29807	1
	ENSMUSG00000044881	Coa4	1	0.825993	1.77275	5.86098e-06		ENSMUSG00000030737	Slco2b1	1	1.00119	2.00164	0.00464867		ENSMUSG00000031907	Zfp90	0	0.323963	1.25176	0.792817		ENSMUSG00000026532	Spta1	0	0.376333	1.29804	1
	ENSMUSG00000026544	Dusp23	1	0.825727	1.77243	0.0145041		ENSMUSG00000034664	Itga2b	1	1.00113	2.00157	0.000728629		ENSMUSG00000021696	Elovl7	0	0.323682	1.25152	0.669653		ENSMUSG00000036887	C1qa	0	0.376111	1.29784	1
	ENSMUSG00000047747	Rnf150	0	0.824946	1.77147	0.0522653		ENSMUSG00000036896	C1qc	1	0.998932	1.99852	3.57772e-05		ENSMUSG00000024298	Zfp871	0	0.323674	1.25151	0.447011		ENSMUSG00000020389	Cdkl3	0	0.37602	1.29776	1
	ENSMUSG00000087644	Gm14703	1	0.824592	1.77103	0.0285489		ENSMUSG00000042675	Ypel3	1	0.993623	1.99118	1.25918e-08		ENSMUSG00000007812	Zfp655	0	0.323307	1.25119	0.550929		ENSMUSG00000027669	Gnb4	0	0.375914	1.29766	1
	ENSMUSG00000017639	Rab11fip4	1	0.823309	1.76946	3.36587e-07		ENSMUSG00000061878	Sphk1	0	0.992172	1.98918	0.0803957		ENSMUSG00000029016	Clcn6	0	0.323252	1.25115	0.651797		ENSMUSG00000043252	Tmem64	0	0.375337	1.29714	1
	ENSMUSG00000027639	Samhd1	1	0.821896	1.76773	3.4612e-08		ENSMUSG00000033880	Lgals3bp	1	0.991312	1.98799	0.00010679		ENSMUSG00000060771	Tsga10	0	0.323172	1.25108	0.709793		ENSMUSG00000020474	Polm	0	0.375122	1.29695	1
	ENSMUSG00000112148	Lilrb4a	1	0.821691	1.76748	0.00473033		ENSMUSG00000040722	Scamp5	1	0.991156	1.98778	0.0491349		ENSMUSG00000074220	Zfp382	0	0.322564	1.25055	0.726455		ENSMUSG00000047407	Tgif1	0	0.374826	1.29668	1
	ENSMUSG00000053716	Dusp7	1	0.818486	1.76355	0.000507337		ENSMUSG00000044501	Zfp758	1	0.989635	1.98568	1.97856e-06		ENSMUSG00000024201	Kdm4b	0	0.322376	1.25039	0.466591		ENSMUSG00000062101	Zfp119b	0	0.374814	1.29667	1
	ENSMUSG00000019210	Atp6v1e1	1	0.816977	1.76171	1.01267e-10		ENSMUSG00000085622	3110056K07Rik	1	0.988958	1.98475	0.0067905		ENSMUSG00000020553	Pctp	0	0.32152	1.24965	0.657974		ENSMUSG00000004837	Grap	0	0.374254	1.29617	1
	ENSMUSG00000041977	Arhgef11	1	0.816482	1.76111	5.98232e-07		ENSMUSG00000060519	Tor3a	1	0.986552	1.98144	2.61828e-07		ENSMUSG00000031808	Slc27a1	0	0.320902	1.24911	0.817357		ENSMUSG00000016496	Cd274	0	0.373893	1.29584	1
	ENSMUSG00000051397	Tacstd2	1	0.816284	1.76087	0.000307043		ENSMUSG00000086841	2410006H16Rik	1	0.98628	1.98107	0.000701007		ENSMUSG00000045932	Ifit2	0	0.320794	1.24902	0.474383		ENSMUSG00000071632	2510002D24Rik	0	0.373275	1.29529	1
	ENSMUSG00000030000	Add2	0	0.816042	1.76057	0.199704		ENSMUSG00000028295	Smim8	1	0.98527	1.97968	0.00317333		ENSMUSG00000029050	Ski	0	0.320658	1.2489	0.480377		ENSMUSG00000030055	Rab43	0	0.372492	1.29459	0.9801
	ENSMUSG00000053769	Lysmd1	1	0.815805	1.76028	0.0238062		ENSMUSG00000010307	Tmem86a	1	0.984215	1.97824	3.00948e-05		ENSMUSG00000051256	Jagn1	0	0.32065	1.24889	0.582693		ENSMUSG00000051098	Mblac2	0	0.372127	1.29426	1
	ENSMUSG00000086146	Gm15729	1	0.815443	1.75984	0.00322949		ENSMUSG00000078853	Igtp	1	0.984091	1.97807	6.34776e-06		ENSMUSG00000040102	Klhl42	0	0.320577	1.24883	0.683656		ENSMUSG00000074466	Gm15417	0	0.372048	1.29419	1
	ENSMUSG00000099843	Gm7160	0	0.813976	1.75805	0.0526228		ENSMUSG00000044468	Tent5c	1	0.981479	1.97449	4.28238e-07		ENSMUSG00000029512	Ulk1	0	0.32049	1.24875	0.557996		ENSMUSG00000001865	Cpa3	0	0.371919	1.29407	1
	ENSMUSG00000025997	Ikzf2	0	0.812833	1.75666	0.276495		ENSMUSG00000046404	Yod1	1	0.980927	1.97373	0.0144875		ENSMUSG00000066687	Zbtb16	0	0.319387	1.2478	0.747079		ENSMUSG00000023868	Pde10a	0	0.371732	1.29391	1
	ENSMUSG00000069899	Gm12166	0	0.811996	1.75564	0.0996098		ENSMUSG00000079067	Hmgn2-ps1	1	0.980853	1.97363	0.0100097		ENSMUSG00000055866	Per2	0	0.319204	1.24764	0.535918		ENSMUSG00000020681	Ace	0	0.371716	1.29389	1
	ENSMUSG00000041362	Shtn1	0	0.810043	1.75326	0.121571		ENSMUSG00000022148	Fyb	1	0.979472	1.97174	1.143e-12		ENSMUSG00000036273	Lrrk2	0	0.318956	1.24743	0.509743		ENSMUSG00000079067	Hmgn2-ps1	0	0.371393	1.2936	1
	ENSMUSG00000034438	Gbp8	0	0.808569	1.75147	0.17357		ENSMUSG00000039968	Rsbn1l	1	0.97935	1.97158	5.54126e-07		ENSMUSG00000030126	Tmcc1	0	0.318888	1.24737	0.481097		ENSMUSG00000039908	Slc26a11	0	0.371334	1.29355	1
	ENSMUSG00000008843	Cldn13	0	0.806755	1.74927	0.269649		ENSMUSG00000094392	Gm3788	1	0.97764	1.96924	0.00254651		ENSMUSG00000005686	Ampd3	0	0.318848	1.24733	0.474383		ENSMUSG00000049608	Gpr55	0	0.370638	1.29292	1
	ENSMUSG00000025473	Adam8	1	0.806055	1.74842	0.000243088		ENSMUSG00000058624	Gda	1	0.97697	1.96833	9.84972e-17		ENSMUSG00000000530	Acvrl1	0	0.318478	1.24701	0.570236		ENSMUSG00000083041	Gmfg-ps	0	0.370537	1.29283	1
	ENSMUSG00000074063	Osgin1	1	0.805234	1.74743	0.000385971		ENSMUSG00000000184	Ccnd2	1	0.97642	1.96758	1.31177e-05		ENSMUSG00000025231	Sufu	0	0.318304	1.24686	0.695543		ENSMUSG00000023044	Csad	0	0.370505	1.29281	0.91376
	ENSMUSG00000050270	Tmem220	1	0.8046	1.74666	0.040242		ENSMUSG00000030108	Slc6a13	1	0.974809	1.96538	0.003255		ENSMUSG00000046556	Zfp319	0	0.318295	1.24686	0.490598		ENSMUSG00000045087	S1pr5	0	0.370492	1.29279	1
	ENSMUSG00000025810	Nrp1	1	0.804432	1.74646	3.24667e-09		ENSMUSG00000109675	Nxpe1-ps	1	0.97356	1.96368	0.0206462		ENSMUSG00000029624	Ptcd1	0	0.318258	1.24682	0.478207		ENSMUSG00000038150	Ormdl3	0	0.370215	1.29255	0.811886
	ENSMUSG00000033276	Stk36	0	0.803572	1.74542	0.161449		ENSMUSG00000029059	Fam213b	1	0.973311	1.96334	0.00770559		ENSMUSG00000026004	Kansl1l	0	0.317218	1.24593	0.674081		ENSMUSG00000074358	Ccdc61	0	0.370109	1.29245	0.627346
	ENSMUSG00000094356	Igkv8-28	0	0.80317	1.74493	0.612249		ENSMUSG00000023235	Ccl25	0	0.973254	1.96326	0.0843289		ENSMUSG00000042202	Slc35e2	0	0.317173	1.24589	0.561909		ENSMUSG00000024610	Cd74	0	0.369537	1.29194	1
	ENSMUSG00000041949	Tango6	1	0.801435	1.74283	1.54569e-07		ENSMUSG00000079184	Mphosph8	1	0.972621	1.9624	0.000414072		ENSMUSG00000038145	Snrk	0	0.317027	1.24576	0.497331		ENSMUSG00000054426	A930005H10Rik	0	0.369363	1.29178	1
	ENSMUSG00000063684	Gm13910	0	0.800928	1.74222	0.217234		ENSMUSG00000020982	Nemf	1	0.970167	1.95907	4.47876e-07		ENSMUSG00000040296	Ddx58	0	0.316868	1.24562	0.525352		ENSMUSG00000064225	Paqr9	0	0.368718	1.2912	1
	ENSMUSG00000028439	Fam219a	1	0.800344	1.74152	1.48089e-05		ENSMUSG00000092607	Scnm1	1	0.970031	1.95888	1.91937e-08		ENSMUSG00000033166	Dis3	0	0.31677	1.24554	0.720913		ENSMUSG00000015243	Abca1	0	0.368397	1.29092	1
	ENSMUSG00000021127	Zfp36l1	1	0.800127	1.74125	2.05287e-05		ENSMUSG00000025408	Ddit3	1	0.969458	1.9581	0.000224758		ENSMUSG00000043290	Zfp784	0	0.316619	1.24541	0.718054		ENSMUSG00000029916	Agk	0	0.368384	1.29091	1
	ENSMUSG00000111378	Gm47230	0	0.799064	1.73997	0.0554579		ENSMUSG00000024055	Cyp4f13	1	0.968662	1.95703	0.000103655		ENSMUSG00000006301	Tmbim1	0	0.316597	1.24539	0.734804		ENSMUSG00000039713	Plekhg5	0	0.368378	1.2909	1
	ENSMUSG00000116097	Gm36738	1	0.799061	1.73997	0.0200589		ENSMUSG00000001128	Cfp	1	0.968603	1.95694	9.1782e-10		ENSMUSG00000052085	Dock8	0	0.31624	1.24508	0.447011		ENSMUSG00000097164	Cep83os	0	0.367725	1.29032	1
	ENSMUSG00000053684	BC048403	1	0.798234	1.73897	0.00274665		ENSMUSG00000025898	Cwf19l2	1	0.967028	1.95481	1.31566e-07		ENSMUSG00000032053	Pou2af1	0	0.315797	1.2447	0.726455		ENSMUSG00000023274	Cd4	0	0.367702	1.2903	1
	ENSMUSG00000040724	Kcna2	0	0.798001	1.73869	0.0941278		ENSMUSG00000020642	Rnf144a	1	0.96688	1.95461	1.26305e-08		ENSMUSG00000025200	Cwf19l1	0	0.315367	1.24433	0.679069		ENSMUSG00000035342	Lzts2	0	0.367573	1.29018	1
	ENSMUSG00000040907	Atp1a3	1	0.797661	1.73828	5.13374e-05		ENSMUSG00000061207	Stk19	1	0.966662	1.95431	0.00446469		ENSMUSG00000033174	Mgll	0	0.31529	1.24426	0.466591		ENSMUSG00000003541	Ier3	0	0.367361	1.28999	0.951014
	ENSMUSG00000038279	Nop2	1	0.797621	1.73823	8.03023e-05		ENSMUSG00000044708	Kcnj10	1	0.966311	1.95384	0.00178102		ENSMUSG00000064120	Mocs1	0	0.314893	1.24392	0.417829		ENSMUSG00000026131	Dst	0	0.367153	1.2898	1
	ENSMUSG00000079067	Hmgn2-ps1	0	0.797163	1.73768	0.052632		ENSMUSG00000029084	Cd38	1	0.963899	1.95057	0.00533717		ENSMUSG00000001768	Rin2	0	0.314615	1.24368	0.56911		ENSMUSG00000052861	Dnah6	0	0.365896	1.28868	1
	ENSMUSG00000028843	Sh3bgrl3	1	0.795746	1.73597	2.06499e-07		ENSMUSG00000052748	Swt1	1	0.963003	1.94936	5.42021e-06		ENSMUSG00000053226	Dand5	0	0.314555	1.24363	0.787968		ENSMUSG00000057147	Dph6	0	0.365765	1.28857	1
	ENSMUSG00000022148	Fyb	1	0.795721	1.73595	4.18432e-08		ENSMUSG00000066684	Pilrb1	1	0.961365	1.94715	3.6889e-09		ENSMUSG00000039852	Rere	0	0.313958	1.24311	0.328703		ENSMUSG00000036381	P2ry14	0	0.365719	1.28852	1
	ENSMUSG00000030589	Rasgrp4	1	0.794862	1.73491	1.51085e-06		ENSMUSG00000098332	2310009A05Rik	1	0.960942	1.94658	1.93547e-05		ENSMUSG00000031627	Irf2	0	0.313889	1.24305	0.442115		ENSMUSG00000087269	D330023K18Rik	0	0.365034	1.28791	1
	ENSMUSG00000038085	Cnbd2	1	0.793073	1.73276	0.00697777		ENSMUSG00000115338	Pnp	1	0.95927	1.94433	1.64208e-08		ENSMUSG00000046185	Zfp84	0	0.313603	1.24281	0.590409		ENSMUSG00000064373	Selenop	0	0.364778	1.28768	1
	ENSMUSG00000041263	Rusc1	0	0.792854	1.7325	0.116457		ENSMUSG00000034226	Rhov	1	0.956719	1.94089	3.8885e-05		ENSMUSG00000042644	Itpr3	0	0.313588	1.2428	0.795687		ENSMUSG00000110275	Gm5905	0	0.36395	1.28694	1
	ENSMUSG00000037922	Bank1	1	0.790804	1.73004	0.000230978		ENSMUSG00000031785	Adgrg1	1	0.955858	1.93973	0.00214618		ENSMUSG00000029033	Acap3	0	0.313173	1.24244	0.374449		ENSMUSG00000116875	Morf4l1-ps1	0	0.363587	1.28662	1
	ENSMUSG00000029570	Lfng	1	0.789686	1.7287	1.10853e-08		ENSMUSG00000087687	Pet100	1	0.955499	1.93925	1.44906e-05		ENSMUSG00000000631	Myo18a	0	0.313158	1.24242	0.461128		ENSMUSG00000007476	Lrrc8a	0	0.363573	1.28661	1
	ENSMUSG00000024856	Cdk2ap2	1	0.789489	1.72846	5.21123e-08		ENSMUSG00000017057	Il13ra1	1	0.954002	1.93724	0.000269418		ENSMUSG00000030172	Erc1	0	0.313136	1.24241	0.617824		ENSMUSG00000101523	Gm10031	0	0.363075	1.28616	1
	ENSMUSG00000024726	Carnmt1	1	0.78903	1.72791	0.0165357		ENSMUSG00000043004	Gng2	1	0.952914	1.93578	9.58462e-09		ENSMUSG00000030213	Atf7ip	0	0.312697	1.24203	0.451199		ENSMUSG00000036594	H2-Aa	0	0.362306	1.28548	1
	ENSMUSG00000029413	Naaa	1	0.788093	1.72679	0.00351291		ENSMUSG00000104351	Gm37125	0	0.949893	1.93173	0.229905		ENSMUSG00000010290	AI597479	0	0.312488	1.24185	0.725836		ENSMUSG00000050666	Vstm4	0	0.36204	1.28524	1
	ENSMUSG00000041538	H2-Ob	0	0.787562	1.72615	0.135748		ENSMUSG00000027624	Epb41l1	1	0.949243	1.93086	0.0258358		ENSMUSG00000041037	Irgq	0	0.311017	1.24058	0.572354		ENSMUSG00000102101	Zbtb11os1	0	0.362027	1.28523	1
	ENSMUSG00000025150	Cbr2	1	0.787165	1.72568	0.0346928		ENSMUSG00000021127	Zfp36l1	1	0.948661	1.93008	8.97434e-08		ENSMUSG00000038375	Trp53inp2	0	0.310596	1.24022	0.578023		ENSMUSG00000098134	Rnf113a2	0	0.36162	1.28487	0.772104
	ENSMUSG00000068923	Syt11	1	0.786659	1.72508	0.0120728		ENSMUSG00000024856	Cdk2ap2	1	0.948021	1.92922	6.33578e-12		ENSMUSG00000022894	Adamts5	0	0.310555	1.24018	0.833983		ENSMUSG00000025408	Ddit3	0	0.36128	1.28457	1
	ENSMUSG00000008845	Cd163	0	0.785911	1.72418	0.0551009		ENSMUSG00000022013	Dnajc15	1	0.946722	1.92749	0.000144718		ENSMUSG00000030839	Sergef	0	0.309763	1.2395	0.834734		ENSMUSG00000041117	Ccdc8	0	0.361271	1.28456	1
	ENSMUSG00000046185	Zfp84	1	0.78522	1.72336	0.000293601		ENSMUSG00000069662	Marcks	1	0.944648	1.92472	8.22834e-07		ENSMUSG00000028688	Toe1	0	0.309497	1.23928	0.670293		ENSMUSG00000037096	Gm9762	0	0.36122	1.28451	1
	ENSMUSG00000055296	Tmem245	1	0.781496	1.71891	0.00134442		ENSMUSG00000030423	Pop4	1	0.941739	1.92084	1.84527e-06		ENSMUSG00000060510	Zfp266	0	0.309393	1.23919	0.727014		ENSMUSG00000031438	Rnf128	0	0.361058	1.28437	1
	ENSMUSG00000022651	Retnlg	1	0.781288	1.71867	0.00227638		ENSMUSG00000053012	Krcc1	1	0.941137	1.92004	7.86248e-06		ENSMUSG00000037134	Prmt9	0	0.309366	1.23916	0.510779		ENSMUSG00000025825	Iscu	0	0.360813	1.28415	0.706338
	ENSMUSG00000035944	Ttc38	1	0.78055	1.71779	8.64121e-05		ENSMUSG00000018774	Cd68	1	0.939185	1.91744	6.93857e-09		ENSMUSG00000041642	Kif21b	0	0.309215	1.23903	0.511968		ENSMUSG00000009076	Zmat5	0	0.360299	1.28369	1
	ENSMUSG00000026879	Gsn	1	0.779929	1.71705	3.01018e-07		ENSMUSG00000036390	Gadd45a	1	0.93904	1.91725	4.38559e-07		ENSMUSG00000033016	Nfatc1	0	0.309178	1.239	0.440274		ENSMUSG00000075010	AW112010	0	0.360208	1.28361	1
	ENSMUSG00000039908	Slc26a11	1	0.778873	1.71579	0.0366265		ENSMUSG00000068566	Myadm	1	0.937565	1.91529	1.15316e-11		ENSMUSG00000047264	Zfp358	0	0.309109	1.23894	0.605316		ENSMUSG00000078921	Tgtp2	0	0.35956	1.28303	1
	ENSMUSG00000028893	Sesn2	1	0.778251	1.71505	2.89415e-05		ENSMUSG00000017737	Mmp9	1	0.937414	1.91509	8.57488e-06		ENSMUSG00000085287	4833418N02Rik	0	0.308989	1.23884	0.827112		ENSMUSG00000029923	Rab19	0	0.359321	1.28282	1
	ENSMUSG00000063171	Rps4l	0	0.776659	1.71316	0.088758		ENSMUSG00000019210	Atp6v1e1	1	0.936909	1.91442	1.03385e-14		ENSMUSG00000027130	Slc12a6	0	0.308895	1.23876	0.387977		ENSMUSG00000060586	H2-Eb1	0	0.359017	1.28255	1
	ENSMUSG00000049608	Gpr55	0	0.776536	1.71301	0.186689		ENSMUSG00000030990	Pgap2	1	0.9367	1.91414	5.00467e-11		ENSMUSG00000021866	Anxa11	0	0.308636	1.23854	0.509743		ENSMUSG00000024680	Ms4a2	0	0.358826	1.28238	1
	ENSMUSG00000036594	H2-Aa	1	0.775773	1.71211	0.006853		ENSMUSG00000020941	Map3k14	1	0.936263	1.91356	0.00241969		ENSMUSG00000026339	Ccdc93	0	0.308626	1.23853	0.527161		ENSMUSG00000000579	Dynlt1c	0	0.357457	1.28117	1
	ENSMUSG00000109715	Gm45606	0	0.775199	1.71143	0.0742847		ENSMUSG00000020023	Tmcc3	1	0.936219	1.91351	6.47036e-05		ENSMUSG00000019055	Plod1	0	0.308461	1.23839	0.447011		ENSMUSG00000019843	Fyn	0	0.356489	1.28031	1
	ENSMUSG00000028019	Pdgfc	0	0.772889	1.70869	0.202689		ENSMUSG00000033213	AA467197	1	0.936056	1.91329	9.59926e-09		ENSMUSG00000038175	Mylip	0	0.308173	1.23814	0.507518		ENSMUSG00000053877	Srcap	0	0.356267	1.28011	1
	ENSMUSG00000019139	Isyna1	1	0.771172	1.70666	1.0834e-06		ENSMUSG00000021986	Amer2	1	0.933789	1.91029	2.65566e-07		ENSMUSG00000101517	4732465J04Rik	0	0.30805	1.23803	0.766213		ENSMUSG00000032323	Cyp11a1	0	0.356219	1.28007	1
	ENSMUSG00000018507	Trpv2	1	0.771153	1.70663	2.14497e-06		ENSMUSG00000054342	Kcnn4	1	0.932405	1.90846	0.00973311		ENSMUSG00000032109	Nlrx1	0	0.307797	1.23782	0.521927		ENSMUSG00000090439	Gm17455	0	0.356134	1.27999	1
	ENSMUSG00000027597	Ahcy	1	0.770363	1.7057	0.0167196		ENSMUSG00000044328	Trp53i13	1	0.930054	1.90535	0.00167571		ENSMUSG00000019920	Lims1	0	0.307714	1.23774	0.507518		ENSMUSG00000045826	Ptprcap	0	0.355105	1.27908	1
	ENSMUSG00000000682	Cd52	1	0.769114	1.70422	3.22894e-06		ENSMUSG00000085829	Gm4285	1	0.92841	1.90318	0.0195063		ENSMUSG00000033088	Triobp	0	0.307632	1.23767	0.570236		ENSMUSG00000000686	Abhd15	0	0.354809	1.27882	1
	ENSMUSG00000071076	Jund	1	0.766221	1.70081	8.03869e-05		ENSMUSG00000025743	Sdc3	1	0.928089	1.90275	0.000627579		ENSMUSG00000062519	Zfp398	0	0.307417	1.23749	0.657974		ENSMUSG00000074213	Gm10642	0	0.354768	1.27878	1
	ENSMUSG00000057329	Bcl2	0	0.765599	1.70008	0.0638807		ENSMUSG00000023020	Cox14	1	0.927649	1.90217	2.83883e-06		ENSMUSG00000095571	Ighv5-17	0	0.307297	1.23739	0.895743		ENSMUSG00000020654	Adcy3	0	0.35464	1.27867	1
	ENSMUSG00000078763	Slfn1	1	0.765294	1.69972	0.000394246		ENSMUSG00000031245	Hmgn5	1	0.927248	1.90164	8.65239e-07		ENSMUSG00000046879	Irgm1	0	0.30729	1.23738	0.585768		ENSMUSG00000031785	Adgrg1	0	0.3546	1.27863	1
	ENSMUSG00000034278	Dnajc17	1	0.764739	1.69906	0.00555562		ENSMUSG00000030000	Add2	0	0.927108	1.90146	0.109634		ENSMUSG00000082145	Gm12312	0	0.307204	1.23731	0.883274		ENSMUSG00000038175	Mylip	0	0.354102	1.27819	0.772104
	ENSMUSG00000030413	Pglyrp1	1	0.763926	1.6981	1.50367e-05		ENSMUSG00000100153	Ppp1ccb	1	0.926792	1.90104	0.00810679		ENSMUSG00000020272	Stk10	0	0.307182	1.23729	0.521927		ENSMUSG00000022476	Polr3h	0	0.35334	1.27751	1
	ENSMUSG00000023048	Prr13	1	0.763785	1.69794	2.60053e-05		ENSMUSG00000031610	Scrg1	1	0.926113	1.90015	6.71522e-05		ENSMUSG00000021185	Dglucy	0	0.306948	1.23709	0.589131		ENSMUSG00000108732	2310043P16Rik	0	0.353126	1.27733	1
	ENSMUSG00000092074	Dynlt1a	0	0.763407	1.69749	0.450711		ENSMUSG00000023048	Prr13	1	0.925145	1.89888	6.24156e-08		ENSMUSG00000024413	Npc1	0	0.306939	1.23708	0.474383		ENSMUSG00000038178	Slc43a2	0	0.352833	1.27707	0.547376
	ENSMUSG00000026447	Pik3c2b	1	0.763375	1.69746	0.014361		ENSMUSG00000020893	Per1	1	0.924707	1.8983	6.90188e-06		ENSMUSG00000034634	Ly6d	0	0.306839	1.23699	0.781028		ENSMUSG00000044285	Gm1821	0	0.352775	1.27701	1
	ENSMUSG00000032724	Abtb2	1	0.763255	1.69732	0.000336822		ENSMUSG00000039886	Tmem120a	1	0.924412	1.89791	4.13631e-09		ENSMUSG00000074580	4931440P22Rik	0	0.306807	1.23697	0.747079		ENSMUSG00000023020	Cox14	0	0.352621	1.27688	0.995808
	ENSMUSG00000034686	Prr7	1	0.762358	1.69626	0.0312187		ENSMUSG00000000594	Gm2a	1	0.92364	1.89689	4.44555e-11		ENSMUSG00000030134	Rasgef1a	0	0.306655	1.23684	0.822932		ENSMUSG00000059772	Slx1b	0	0.352484	1.27676	1
	ENSMUSG00000010911	Apip	1	0.761553	1.69531	0.00542143		ENSMUSG00000084817	Gm5526	1	0.923406	1.89659	0.000402147		ENSMUSG00000028085	Gatb	0	0.306472	1.23668	0.761291		ENSMUSG00000074743	Thbd	0	0.352335	1.27662	1
	ENSMUSG00000019822	Smpd2	1	0.760817	1.69445	3.99902e-05		ENSMUSG00000014599	Csf1	1	0.923033	1.8961	5.5014e-06		ENSMUSG00000098234	Snhg6	0	0.306463	1.23667	0.789845		ENSMUSG00000030365	Clec2i	0	0.352072	1.27639	1
	ENSMUSG00000020941	Map3k14	1	0.760766	1.69439	0.0206479		ENSMUSG00000075010	AW112010	1	0.922617	1.89555	0.0144818		ENSMUSG00000000915	Hip1r	0	0.305842	1.23614	0.410988		ENSMUSG00000044708	Kcnj10	0	0.351737	1.2761	1
	ENSMUSG00000023809	Rps6ka2	1	0.760385	1.69394	4.43932e-05		ENSMUSG00000038175	Mylip	1	0.922279	1.89511	2.44204e-08		ENSMUSG00000022884	Eif4a2	0	0.30579	1.2361	0.6492		ENSMUSG00000006288	Ttc5	0	0.351064	1.2755	0.91376
	ENSMUSG00000067203	H2-K2	0	0.760382	1.69394	0.232301		ENSMUSG00000022371	Col14a1	1	0.921992	1.89473	0.0154905		ENSMUSG00000026575	Nme7	0	0.305759	1.23607	0.813683		ENSMUSG00000024063	Lbh	0	0.350452	1.27496	0.40814
	ENSMUSG00000026822	Lcn2	1	0.760301	1.69384	1.11664e-06		ENSMUSG00000046245	Pilra	1	0.921897	1.8946	6.07681e-08		ENSMUSG00000026404	Ddx59	0	0.305196	1.23559	0.787627		ENSMUSG00000036537	Rnf113a1	0	0.34965	1.27425	1
	ENSMUSG00000048799	Cep120	1	0.759927	1.69341	2.1418e-08		ENSMUSG00000045954	Cavin2	0	0.921145	1.89362	0.262745		ENSMUSG00000029603	Dtx1	0	0.304962	1.23539	0.852083		ENSMUSG00000055435	Maf	0	0.349451	1.27408	1
	ENSMUSG00000025854	Fam20c	0	0.759488	1.69289	0.069209		ENSMUSG00000064284	Cdpf1	1	0.920544	1.89283	0.0285354		ENSMUSG00000053950	Adnp2	0	0.304698	1.23516	0.497331		ENSMUSG00000055717	Slain1	0	0.348953	1.27364	1
	ENSMUSG00000037095	Lrg1	1	0.759281	1.69265	4.68019e-06		ENSMUSG00000024670	Cd6	1	0.920009	1.89213	0.0106407		ENSMUSG00000035941	Ibtk	0	0.304681	1.23515	0.447868		ENSMUSG00000117818	AC166172.1	0	0.348708	1.27342	1
	ENSMUSG00000064339	mt-Rnr2	1	0.758897	1.6922	8.26252e-07		ENSMUSG00000035329	Fbxo33	1	0.919723	1.89175	9.63363e-06		ENSMUSG00000036537	Rnf113a1	0	0.304393	1.2349	0.679331		ENSMUSG00000030161	Gabarapl1	0	0.347814	1.27263	1
	ENSMUSG00000039115	Itga9	0	0.757979	1.69112	0.0515519		ENSMUSG00000030865	Chp2	0	0.918409	1.89003	0.100607		ENSMUSG00000034928	Rnf44	0	0.304307	1.23483	0.433234		ENSMUSG00000041132	N4bp2l1	0	0.346951	1.27187	0.552081
	ENSMUSG00000052837	Junb	1	0.757552	1.69062	0.000421764		ENSMUSG00000032204	Aqp9	1	0.916065	1.88696	2.56609e-06		ENSMUSG00000051506	Wdfy4	0	0.303922	1.2345	0.417829		ENSMUSG00000036526	Card11	0	0.346806	1.27174	1
	ENSMUSG00000031610	Scrg1	1	0.756977	1.68995	0.00245523		ENSMUSG00000041483	Zfp281	1	0.914151	1.88446	1.00133e-07		ENSMUSG00000039910	Cited2	0	0.302987	1.2337	0.366536		ENSMUSG00000006800	Sulf2	0	0.346097	1.27112	0.891009
	ENSMUSG00000046794	Ppp1r3b	1	0.753596	1.68599	0.000674926		ENSMUSG00000039115	Itga9	1	0.911814	1.88141	0.0101475		ENSMUSG00000001281	Itgb7	0	0.302932	1.23365	0.557885		ENSMUSG00000047090	Tmem198b	0	0.345907	1.27095	1
	ENSMUSG00000043923	Ccdc84	1	0.75319	1.68552	0.0191388		ENSMUSG00000052776	Oas1a	1	0.911496	1.881	4.13242e-05		ENSMUSG00000018433	Nol11	0	0.302878	1.2336	0.744343		ENSMUSG00000087187	Gm13431	0	0.345348	1.27046	1
	ENSMUSG00000026177	Slc11a1	1	0.751575	1.68363	5.23413e-05		ENSMUSG00000045777	Ifitm10	1	0.909993	1.87904	0.00400023		ENSMUSG00000062456	Rpl9-ps6	0	0.302608	1.23337	0.821782		ENSMUSG00000046658	Zfp316	0	0.345238	1.27036	1
	ENSMUSG00000044468	Tent5c	1	0.751111	1.68309	0.000328341		ENSMUSG00000025545	Clybl	0	0.909884	1.8789	0.120021		ENSMUSG00000031217	Efnb1	0	0.302342	1.23314	0.742484		ENSMUSG00000041231	Ublcp1	0	0.344653	1.26985	0.772104
	ENSMUSG00000075370	Igll1	0	0.750746	1.68266	0.0859217		ENSMUSG00000037762	Slc16a9	0	0.909853	1.87885	0.068418		ENSMUSG00000058881	Zfp516	0	0.30232	1.23313	0.43289		ENSMUSG00000027322	Siglec1	0	0.344396	1.26962	1
	ENSMUSG00000023216	Epb42	0	0.749885	1.68166	0.271133		ENSMUSG00000026568	Mpc2	1	0.909531	1.87844	4.73098e-08		ENSMUSG00000021892	Sh3bp5	0	0.302257	1.23307	0.465837		ENSMUSG00000040877	Wdr25	0	0.344191	1.26944	1
	ENSMUSG00000005800	Mmp8	1	0.749462	1.68117	4.13701e-05		ENSMUSG00000094356	Igkv8-28	0	0.907938	1.87636	0.523534		ENSMUSG00000076532	Igkv4-91	0	0.301905	1.23277	0.909547		ENSMUSG00000023055	Calcoco1	0	0.344021	1.26929	0.693124
	ENSMUSG00000033213	AA467197	1	0.749377	1.68107	1.57412e-05		ENSMUSG00000006411	Nectin4	1	0.907893	1.8763	0.0188123		ENSMUSG00000041346	Wrap53	0	0.301816	1.23269	0.651797		ENSMUSG00000039997	Ifi203	0	0.343894	1.26918	1
	ENSMUSG00000027940	Tpm3	1	0.748579	1.68014	3.75344e-10		ENSMUSG00000085148	Mir22hg	1	0.90772	1.87608	0.00402465		ENSMUSG00000001419	Mef2d	0	0.301637	1.23254	0.417829		ENSMUSG00000022957	Itsn1	0	0.343607	1.26893	1
	ENSMUSG00000022103	Gfra2	0	0.748261	1.67977	0.0640501		ENSMUSG00000037475	Thoc2	1	0.907637	1.87597	5.28286e-05		ENSMUSG00000017405	Nek8	0	0.301408	1.23235	0.848189		ENSMUSG00000079659	Tmem243	0	0.343535	1.26886	1
	ENSMUSG00000040435	Ppp1r15a	0	0.748152	1.67964	0.0504674		ENSMUSG00000005057	Sh2b2	1	0.907514	1.87581	3.27905e-05		ENSMUSG00000030880	Polr3e	0	0.301379	1.23232	0.786052		ENSMUSG00000087403	Kantr	0	0.343064	1.26845	1
	ENSMUSG00000038776	Ephx1	1	0.747755	1.67918	0.0454688		ENSMUSG00000058503	Fam133b	1	0.907264	1.87549	4.66128e-05		ENSMUSG00000038179	Slamf7	0	0.301326	1.23228	0.735842		ENSMUSG00000067719	Gm10221	0	0.342971	1.26837	1
	ENSMUSG00000006179	Prss16	0	0.747574	1.67897	0.0502206		ENSMUSG00000022562	Oplah	1	0.904994	1.87254	0.0346767		ENSMUSG00000009292	Trpm2	0	0.301191	1.23216	0.510779		ENSMUSG00000032565	Nudt16	0	0.342878	1.26828	0.788849
	ENSMUSG00000034118	Tpst1	0	0.747522	1.67891	0.0778858		ENSMUSG00000040483	Xaf1	1	0.904441	1.87182	0.00490263		ENSMUSG00000037185	Krt80	0	0.301178	1.23215	0.503715		ENSMUSG00000073147	5031425E22Rik	0	0.342786	1.2682	0.804589
	ENSMUSG00000078670	Fam174b	0	0.746047	1.67719	0.105896		ENSMUSG00000031590	Frg1	1	0.903386	1.87045	8.47158e-08		ENSMUSG00000041439	Mfsd6	0	0.300847	1.23187	0.504934		ENSMUSG00000020865	Abcc3	0	0.341613	1.26717	1
	ENSMUSG00000025408	Ddit3	1	0.745533	1.67659	0.00851952		ENSMUSG00000029185	Fam114a1	1	0.902262	1.86899	2.10643e-06		ENSMUSG00000052609	Plekhg3	0	0.300501	1.23157	0.509743		ENSMUSG00000043183	Simc1	0	0.341245	1.26685	1
	ENSMUSG00000024472	Dcp2	1	0.744814	1.67576	0.000129687		ENSMUSG00000005672	Kit	1	0.902228	1.86895	8.8061e-06		ENSMUSG00000075254	Heg1	0	0.300479	1.23155	0.678269		ENSMUSG00000054364	Rhob	0	0.341069	1.26669	0.788849
	ENSMUSG00000045777	Ifitm10	1	0.744766	1.6757	0.0286182		ENSMUSG00000041538	H2-Ob	0	0.902209	1.86893	0.0631666		ENSMUSG00000000278	Scpep1	0	0.30028	1.23138	0.666808		ENSMUSG00000005043	Sgsh	0	0.340544	1.26623	0.812101
	ENSMUSG00000025916	Ppp1r42	1	0.744578	1.67548	0.00621562		ENSMUSG00000035356	Nfkbiz	1	0.901437	1.86793	0.000104446		ENSMUSG00000024680	Ms4a2	0	0.300051	1.23119	0.804509		ENSMUSG00000061313	Ddhd2	0	0.340507	1.2662	1
	ENSMUSG00000022946	Dop1b	1	0.744418	1.6753	5.53243e-05		ENSMUSG00000025492	Ifitm3	1	0.900337	1.8665	1.15986e-08		ENSMUSG00000026979	Psd4	0	0.299356	1.23059	0.466591		ENSMUSG00000030787	Lyve1	0	0.340135	1.26587	1
	ENSMUSG00000040616	Tmem51	1	0.744079	1.67491	0.00771076		ENSMUSG00000078453	Abracl	1	0.900217	1.86635	1.04564e-08		ENSMUSG00000031988	Vps26b	0	0.299338	1.23058	0.447011		ENSMUSG00000025498	Irf7	0	0.340059	1.26581	1
	ENSMUSG00000019960	Dusp6	1	0.74355	1.67429	0.00171696		ENSMUSG00000082127	Gm13577	1	0.899851	1.86587	0.0125909		ENSMUSG00000020196	Cabin1	0	0.299272	1.23052	0.28243		ENSMUSG00000026616	Cr2	0	0.340013	1.26577	1
	ENSMUSG00000027287	Snap23	1	0.742179	1.6727	1.17365e-05		ENSMUSG00000087269	D330023K18Rik	1	0.898535	1.86417	0.00264146		ENSMUSG00000056724	Nbeal2	0	0.298976	1.23027	0.562821		ENSMUSG00000022367	Has2	0	0.33943	1.26526	1
	ENSMUSG00000095115	Itpripl2	1	0.741393	1.67179	6.40398e-06		ENSMUSG00000073529	F830208F22Rik	1	0.897958	1.86343	0.00192013		ENSMUSG00000044783	Hjurp	0	0.298846	1.23016	0.561909		ENSMUSG00000024672	Ms4a7	0	0.339298	1.26514	1
	ENSMUSG00000030579	Tyrobp	1	0.740763	1.67106	7.27113e-05		ENSMUSG00000005983	1700037C18Rik	0	0.897042	1.86224	0.0501463		ENSMUSG00000039834	Zfp335	0	0.298839	1.23015	0.570236		ENSMUSG00000079597	Gm5483	0	0.33923	1.26508	1
	ENSMUSG00000036181	Hist1h1c	1	0.739821	1.66997	0.00886102		ENSMUSG00000036887	C1qa	1	0.896828	1.86197	0.000693655		ENSMUSG00000068551	Zfp467	0	0.298401	1.22978	0.763282		ENSMUSG00000010608	Rbm25	0	0.338856	1.26475	1
	ENSMUSG00000052310	Slc39a1	1	0.739528	1.66963	2.90107e-06		ENSMUSG00000051682	Treml4	1	0.896627	1.86171	0.000334261		ENSMUSG00000022443	Myh9	0	0.297871	1.22933	0.466591		ENSMUSG00000049353	Rd3	0	0.337979	1.26398	1
	ENSMUSG00000045165	AI467606	1	0.739455	1.66955	2.56205e-07		ENSMUSG00000084012	Gm11956	0	0.896598	1.86167	0.127808		ENSMUSG00000060548	Tnfrsf19	0	0.2978	1.22927	0.866002		ENSMUSG00000021391	Cenpp	0	0.337763	1.2638	1
	ENSMUSG00000006494	Pdk1	0	0.739285	1.66935	0.0787229		ENSMUSG00000086894	Gm15708	1	0.894341	1.85876	0.0102625		ENSMUSG00000019850	Tnfaip3	0	0.29773	1.22921	0.56911		ENSMUSG00000004098	Col5a3	0	0.33695	1.26308	1
	ENSMUSG00000065990	Aurkaip1	1	0.7389	1.6689	3.23277e-05		ENSMUSG00000073987	Ggh	1	0.892818	1.8568	2.87154e-07		ENSMUSG00000039157	Fam102a	0	0.297215	1.22877	0.447011		ENSMUSG00000018378	Cuedc1	0	0.336906	1.26304	1
	ENSMUSG00000052676	Zmat1	1	0.738454	1.66839	0.00963309		ENSMUSG00000024014	Pim1	1	0.892202	1.85601	7.16368e-09		ENSMUSG00000016382	Pls3	0	0.297149	1.22871	0.910226		ENSMUSG00000008206	Cers4	0	0.336868	1.26301	1
	ENSMUSG00000034634	Ly6d	0	0.738454	1.66839	0.0674158		ENSMUSG00000037860	Aim2	1	0.891162	1.85467	0.00020773		ENSMUSG00000043286	Pnpla1	0	0.297113	1.22868	0.678871		ENSMUSG00000024217	Snrpc	0	0.336809	1.26296	0.540622
	ENSMUSG00000097119	B230354K17Rik	1	0.737764	1.66759	0.0427507		ENSMUSG00000111752	Gm38575	1	0.890732	1.85412	0.00199665		ENSMUSG00000000916	Nsun5	0	0.296325	1.22801	0.835026		ENSMUSG00000085995	Gm2788	0	0.336719	1.26288	1
	ENSMUSG00000060519	Tor3a	1	0.737745	1.66757	0.000287295		ENSMUSG00000041328	Pcf11	1	0.889996	1.85317	1.46232e-06		ENSMUSG00000030397	Mark4	0	0.296148	1.22786	0.441677		ENSMUSG00000085704	4921531C22Rik	0	0.335895	1.26216	1
	ENSMUSG00000033863	Klf9	1	0.737489	1.66727	0.0212464		ENSMUSG00000024082	Ndufaf7	1	0.889915	1.85307	7.59291e-09		ENSMUSG00000027200	Sema6d	0	0.29532	1.22716	0.817357		ENSMUSG00000062270	Morf4l1	0	0.335866	1.26213	1
	ENSMUSG00000014599	Csf1	1	0.736026	1.66558	0.000759072		ENSMUSG00000029470	P2rx4	1	0.889903	1.85305	9.80528e-05		ENSMUSG00000041040	Fam117b	0	0.295247	1.2271	0.366536		ENSMUSG00000097705	Gm26740	0	0.335778	1.26206	1
	ENSMUSG00000082820	Gm13803	0	0.735915	1.66545	0.437738		ENSMUSG00000002105	Slc39a13	1	0.889687	1.85277	9.33634e-05		ENSMUSG00000028028	Alpk1	0	0.295189	1.22705	0.735647		ENSMUSG00000038888	Ctu1	0	0.335765	1.26205	1
	ENSMUSG00000046879	Irgm1	1	0.735514	1.66499	0.000443611		ENSMUSG00000065990	Aurkaip1	1	0.887619	1.85012	1.19837e-07		ENSMUSG00000034462	Pkd2	0	0.295055	1.22693	0.864336		ENSMUSG00000051314	Ffar2	0	0.335609	1.26191	0.39368
	ENSMUSG00000040296	Ddx58	1	0.73466	1.664	7.51499e-05		ENSMUSG00000022521	Crebbp	1	0.887558	1.85004	0.000325812		ENSMUSG00000022489	Pde1b	0	0.294674	1.22661	0.76159		ENSMUSG00000079017	Ifi27l2a	0	0.335481	1.2618	1
	ENSMUSG00000032526	Ss18l2	1	0.734497	1.66382	0.00211727		ENSMUSG00000015850	Adamtsl4	1	0.887541	1.85002	0.000591549		ENSMUSG00000005682	Pan2	0	0.294257	1.22625	0.542555		ENSMUSG00000060044	Tmem26	0	0.335058	1.26143	1
	ENSMUSG00000042608	Stk40	1	0.73235	1.66134	1.0871e-05		ENSMUSG00000107411	Gm19040	1	0.886588	1.8488	0.030866		ENSMUSG00000061232	H2-K1	0	0.294233	1.22623	0.472799		ENSMUSG00000062515	Fabp4	0	0.334704	1.26112	1
	ENSMUSG00000090877	Hspa1b	0	0.732293	1.66128	0.36111		ENSMUSG00000047867	Gimap6	1	0.886317	1.84845	0.0287166		ENSMUSG00000038831	Ralgps1	0	0.294145	1.22616	0.573337		ENSMUSG00000023030	Slc11a2	0	0.3346	1.26103	1
	ENSMUSG00000022824	Muc13	0	0.732265	1.66125	0.0941278		ENSMUSG00000029392	Rilpl1	1	0.885639	1.84758	0.0161222		ENSMUSG00000037946	Fgd3	0	0.294138	1.22615	0.562821		ENSMUSG00000114493	Gm47071	0	0.334455	1.2609	1
	ENSMUSG00000032115	Hyou1	1	0.731972	1.66091	0.000751188		ENSMUSG00000105139	Gm19391	0	0.885472	1.84737	0.0760031		ENSMUSG00000039158	Akna	0	0.293805	1.22587	0.49882		ENSMUSG00000037336	Mfsd2b	0	0.334033	1.26053	1
	ENSMUSG00000028680	Plk3	1	0.731136	1.65995	0.000601519		ENSMUSG00000026177	Slc11a1	1	0.884722	1.84641	4.76124e-07		ENSMUSG00000025921	Rdh10	0	0.293364	1.22549	0.717532		ENSMUSG00000036501	Fam13b	0	0.334021	1.26052	0.788849
	ENSMUSG00000069539	Scyl2	1	0.730257	1.65893	1.72303e-06		ENSMUSG00000003541	Ier3	1	0.884719	1.84641	1.42407e-05		ENSMUSG00000056602	Fry	0	0.293231	1.22538	0.44096		ENSMUSG00000022064	Pibf1	0	0.333802	1.26033	1
	ENSMUSG00000024290	Rock1	1	0.729303	1.65784	0.0182689		ENSMUSG00000053347	Zfp943	1	0.88452	1.84615	1.81873e-05		ENSMUSG00000078676	Casc3	0	0.29306	1.22524	0.380329		ENSMUSG00000049411	Tmem241	0	0.333777	1.26031	1
	ENSMUSG00000030990	Pgap2	1	0.728641	1.65708	1.44164e-06		ENSMUSG00000035493	Tgfbi	1	0.884054	1.84555	7.48831e-09		ENSMUSG00000041161	Otud3	0	0.292501	1.22476	0.669653		ENSMUSG00000032691	Nlrp3	0	0.333638	1.26019	1
	ENSMUSG00000028825	Rhd	0	0.728249	1.65663	0.195475		ENSMUSG00000110841	Gpx4-ps2	1	0.883676	1.84507	0.00187818		ENSMUSG00000022016	Akap11	0	0.292292	1.22458	0.509743		ENSMUSG00000094546	Ighv1-26	0	0.333449	1.26002	1
	ENSMUSG00000078920	Ifi47	1	0.727775	1.65608	0.00123899		ENSMUSG00000039485	Tspyl4	0	0.883657	1.84505	0.0621868		ENSMUSG00000021796	Bmpr1a	0	0.292242	1.22454	0.611074		ENSMUSG00000029603	Dtx1	0	0.33263	1.25931	1
	ENSMUSG00000032089	Il10ra	1	0.727668	1.65596	1.97213e-05		ENSMUSG00000037731	Themis2	1	0.883587	1.84496	2.24267e-09		ENSMUSG00000076614	Ighg1	0	0.292065	1.22439	0.913078		ENSMUSG00000020604	Arsg	0	0.332629	1.25931	0.772104
	ENSMUSG00000027398	Il1b	1	0.726722	1.65487	0.00361387		ENSMUSG00000015839	Nfe2l2	1	0.883503	1.84485	5.00434e-18		ENSMUSG00000021916	Glt8d1	0	0.291844	1.2242	0.714288		ENSMUSG00000003948	Mmd	0	0.332577	1.25926	1
	ENSMUSG00000030824	Nucb1	1	0.726478	1.6546	7.86202e-10		ENSMUSG00000069206	Zfp874a	1	0.881365	1.84212	0.0238386		ENSMUSG00000027864	Ptgfrn	0	0.291682	1.22407	0.786327		ENSMUSG00000029127	Zbtb49	0	0.332008	1.25876	1
	ENSMUSG00000027395	Polr1b	0	0.726124	1.65419	0.0531528		ENSMUSG00000074063	Osgin1	1	0.88052	1.84104	4.05606e-05		ENSMUSG00000035476	Tab3	0	0.291481	1.2239	0.578023		ENSMUSG00000038240	Pdss2	0	0.331526	1.25834	1
	ENSMUSG00000042675	Ypel3	1	0.725793	1.65381	0.00011368		ENSMUSG00000101970	1810026B05Rik	1	0.880385	1.84087	0.0054605		ENSMUSG00000020400	Tnip1	0	0.291298	1.22374	0.465837		ENSMUSG00000092368	A930015D03Rik	0	0.331386	1.25822	1
	ENSMUSG00000031785	Adgrg1	1	0.724669	1.65252	0.0335459		ENSMUSG00000016194	Hsd11b1	1	0.878336	1.83825	1.58409e-12		ENSMUSG00000036411	9530077C05Rik	0	0.291289	1.22373	0.649958		ENSMUSG00000036572	Upf3b	0	0.331164	1.25803	1
	ENSMUSG00000076508	Igkv17-127	0	0.724439	1.65226	0.280497		ENSMUSG00000021185	Dglucy	1	0.87734	1.83699	1.35505e-05		ENSMUSG00000044795	Cyb5d1	0	0.291206	1.22366	0.803798		ENSMUSG00000068735	Trp53i11	0	0.33094	1.25783	1
	ENSMUSG00000090641	Zfp712	0	0.723805	1.65153	0.0994522		ENSMUSG00000023367	Tmem176a	1	0.875567	1.83473	0.0051252		ENSMUSG00000029345	Tfip11	0	0.29089	1.2234	0.495003		ENSMUSG00000063953	Amd2	0	0.330395	1.25736	1
	ENSMUSG00000034226	Rhov	1	0.719972	1.64715	0.00458016		ENSMUSG00000060791	Gmfg	1	0.875215	1.83428	1.65619e-05		ENSMUSG00000018168	Ikzf3	0	0.290589	1.22314	0.754412		ENSMUSG00000020183	Cpm	0	0.33035	1.25732	1
	ENSMUSG00000078771	Evi2a	1	0.719937	1.64711	6.09693e-07		ENSMUSG00000060445	Sycp2	1	0.874143	1.83292	0.0394731		ENSMUSG00000000134	Tfe3	0	0.289959	1.22261	0.557972		ENSMUSG00000019808	Adat2	0	0.330039	1.25705	1
	ENSMUSG00000078994	Zfp429	1	0.719755	1.6469	0.0233548		ENSMUSG00000047798	Cd300lf	1	0.873737	1.8324	4.38148e-08		ENSMUSG00000096719	Mrgpra2b	0	0.28919	1.22195	0.570236		ENSMUSG00000020544	Cox11	0	0.329992	1.25701	1
	ENSMUSG00000056999	Ide	1	0.719664	1.6468	0.0239718		ENSMUSG00000020205	Phlda1	1	0.873186	1.8317	0.000411472		ENSMUSG00000029561	Oasl2	0	0.28918	1.22195	0.749273		ENSMUSG00000014361	Mertk	0	0.329711	1.25676	1
	ENSMUSG00000097514	Gm17619	0	0.719196	1.64626	0.0606178		ENSMUSG00000042286	Stab1	0	0.873173	1.83169	0.0573408		ENSMUSG00000004996	Mri1	0	0.289166	1.22193	0.780474		ENSMUSG00000049295	Zfp219	0	0.329372	1.25647	1
	ENSMUSG00000026104	Stat1	1	0.718448	1.64541	2.81509e-08		ENSMUSG00000029060	Mib2	1	0.872015	1.83022	1.82528e-08		ENSMUSG00000042401	Crtac1	0	0.288811	1.22163	0.704212		ENSMUSG00000037151	Lrrc20	0	0.328963	1.25611	1
	ENSMUSG00000017631	Abr	1	0.71831	1.64525	1.7315e-07		ENSMUSG00000030671	Pde3b	1	0.871805	1.82995	0.000275072		ENSMUSG00000020669	Sh3yl1	0	0.288167	1.22109	0.804033		ENSMUSG00000086841	2410006H16Rik	0	0.32874	1.25592	1
	ENSMUSG00000044708	Kcnj10	1	0.716594	1.6433	0.0347287		ENSMUSG00000002602	Axl	1	0.87101	1.82894	0.00493077		ENSMUSG00000051344	Plekhm3	0	0.287851	1.22082	0.531673		ENSMUSG00000004996	Mri1	0	0.328731	1.25591	1
	ENSMUSG00000014361	Mertk	0	0.716278	1.64294	0.0857685		ENSMUSG00000064337	mt-Rnr1	1	0.867377	1.82434	4.35672e-11		ENSMUSG00000020227	Irak3	0	0.287236	1.2203	0.43289		ENSMUSG00000051906	Cd209f	0	0.328675	1.25586	1
	ENSMUSG00000021592	Arsk	0	0.715341	1.64187	0.0560549		ENSMUSG00000037958	Nsrp1	1	0.866547	1.82329	9.98135e-08		ENSMUSG00000043432	Leng9	0	0.287087	1.22017	0.684872		ENSMUSG00000060675	Pla2g16	0	0.328346	1.25557	1
	ENSMUSG00000026131	Dst	0	0.713589	1.63988	0.244794		ENSMUSG00000106106	CT010467.1	1	0.866283	1.82296	0.0175187		ENSMUSG00000028864	Hgf	0	0.287068	1.22016	0.631803		ENSMUSG00000031791	Tmem38a	0	0.328269	1.25551	1
	ENSMUSG00000004056	Akt2	1	0.713576	1.63986	3.4462e-09		ENSMUSG00000025790	Slco3a1	1	0.863761	1.81978	1.93573e-07		ENSMUSG00000042292	Mrtfa	0	0.287055	1.22015	0.495935		ENSMUSG00000030917	Tmem159	0	0.328249	1.25549	1
	ENSMUSG00000053158	Fes	1	0.713413	1.63968	3.80277e-08		ENSMUSG00000035954	Dock4	1	0.863508	1.81946	0.0275318		ENSMUSG00000005718	Tfap4	0	0.287024	1.22012	0.896209		ENSMUSG00000001288	Rarg	0	0.327786	1.25509	0.907317
	ENSMUSG00000063902	Gm7964	0	0.712401	1.63853	0.23942		ENSMUSG00000001763	Tspan33	0	0.862986	1.8188	0.0579362		ENSMUSG00000037849	Ifi206	0	0.286907	1.22002	0.835183		ENSMUSG00000071256	Zfp213	0	0.32752	1.25485	1
	ENSMUSG00000100147	1700047M11Rik	1	0.711734	1.63777	0.0121925		ENSMUSG00000022420	Dnal4	1	0.862793	1.81856	2.20949e-05		ENSMUSG00000033705	Stard9	0	0.286881	1.22	0.867871		ENSMUSG00000101191	Gm28809	0	0.327385	1.25474	1
	ENSMUSG00000004846	Plod3	1	0.711477	1.63748	1.67079e-06		ENSMUSG00000049184	Purg	1	0.861185	1.81653	0.000673431		ENSMUSG00000031328	Flna	0	0.286835	1.21996	0.548708		ENSMUSG00000033256	Shf	0	0.327341	1.2547	1
	ENSMUSG00000018927	Ccl6	1	0.710813	1.63673	0.00255288		ENSMUSG00000022204	Ngdn	1	0.860023	1.81507	2.02056e-10		ENSMUSG00000018199	Trove2	0	0.286825	1.21995	0.700083		ENSMUSG00000029570	Lfng	0	0.327245	1.25462	0.552081
	ENSMUSG00000109556	Gm38843	1	0.710455	1.63632	0.0337083		ENSMUSG00000062175	Tgif2	0	0.859699	1.81466	0.0929614		ENSMUSG00000025578	Cbx8	0	0.286532	1.2197	0.61575		ENSMUSG00000032890	Rims3	0	0.326713	1.25415	1
	ENSMUSG00000061207	Stk19	0	0.709993	1.6358	0.0571797		ENSMUSG00000033538	Casp4	1	0.858673	1.81337	1.4623e-07		ENSMUSG00000031166	Wdr13	0	0.286516	1.21969	0.651797		ENSMUSG00000042155	Klhl23	0	0.326451	1.25392	1
	ENSMUSG00000070304	Scn2b	0	0.708648	1.63427	0.0564547		ENSMUSG00000023031	Cela1	0	0.858167	1.81273	0.0534421		ENSMUSG00000034342	Cbl	0	0.286239	1.21946	0.43289		ENSMUSG00000028540	Dph2	0	0.326377	1.25386	1
	ENSMUSG00000030681	Mvp	1	0.707293	1.63274	3.06961e-08		ENSMUSG00000028525	Pde4b	1	0.855766	1.80972	2.17652e-06		ENSMUSG00000025332	Kdm5c	0	0.285998	1.21925	0.503561		ENSMUSG00000017677	Wsb1	0	0.326349	1.25384	1
	ENSMUSG00000062210	Tnfaip8	1	0.706788	1.63217	3.09577e-09		ENSMUSG00000022747	St3gal6	1	0.855079	1.80886	0.000244167		ENSMUSG00000041187	Prkd2	0	0.285982	1.21924	0.497331		ENSMUSG00000032011	Thy1	0	0.326153	1.25367	1
	ENSMUSG00000033306	Lpp	1	0.70669	1.63206	0.00944061		ENSMUSG00000027219	Slc28a2	1	0.853869	1.80734	1.98174e-11		ENSMUSG00000010025	Aldh3a2	0	0.285914	1.21918	0.56911		ENSMUSG00000054191	Klf1	0	0.325766	1.25333	1
	ENSMUSG00000051839	Gypa	0	0.706457	1.63179	0.1957		ENSMUSG00000033540	Idua	1	0.853446	1.80681	0.000464233		ENSMUSG00000020868	Xylt2	0	0.285821	1.2191	0.813818		ENSMUSG00000013622	Atraid	0	0.32563	1.25321	1
	ENSMUSG00000032501	Trib1	1	0.706227	1.63153	0.000744103		ENSMUSG00000044881	Coa4	1	0.853007	1.80626	1.20859e-06		ENSMUSG00000029338	Antxr2	0	0.285541	1.21887	0.550929		ENSMUSG00000076508	Igkv17-127	0	0.325614	1.2532	1
	ENSMUSG00000023274	Cd4	1	0.70618	1.63148	0.0443411		ENSMUSG00000097572	Gm26797	1	0.852863	1.80608	2.79074e-06		ENSMUSG00000097352	C920009B18Rik	0	0.285533	1.21886	0.839881		ENSMUSG00000093803	Ppp2r3d	0	0.32549	1.25309	1
	ENSMUSG00000028937	Acot7	1	0.705587	1.63081	2.45225e-05		ENSMUSG00000035704	Alg8	1	0.852681	1.80585	0.0196811		ENSMUSG00000038990	Cables2	0	0.284981	1.21839	0.504915		ENSMUSG00000034265	Zdhhc14	0	0.325425	1.25303	1
	ENSMUSG00000073409	H2-Q6	1	0.704938	1.63007	0.0201453		ENSMUSG00000029648	Flt1	0	0.852621	1.80578	0.13068		ENSMUSG00000038369	Ncoa6	0	0.28475	1.2182	0.474383		ENSMUSG00000076514	Igkv17-121	0	0.325228	1.25286	1
	ENSMUSG00000097754	Ptgs2os2	0	0.704932	1.63007	0.164082		ENSMUSG00000024397	Aif1	1	0.852321	1.8054	0.00879682		ENSMUSG00000028980	H6pd	0	0.284622	1.21809	0.468099		ENSMUSG00000028988	Ctnnbip1	0	0.324549	1.25227	1
	ENSMUSG00000111478	Gm18251	1	0.704833	1.62996	0.0373477		ENSMUSG00000074466	Gm15417	0	0.852111	1.80514	0.123531		ENSMUSG00000015776	Med22	0	0.284413	1.21791	0.468099		ENSMUSG00000029759	Pon3	0	0.324209	1.25198	1
	ENSMUSG00000030787	Lyve1	1	0.701731	1.62646	0.0129711		ENSMUSG00000054641	Mmrn1	0	0.851981	1.80498	0.266437		ENSMUSG00000025236	Adpgk	0	0.284117	1.21767	0.550929		ENSMUSG00000023019	Gpd1	0	0.324183	1.25196	1
	ENSMUSG00000020490	Btnl10	0	0.701321	1.62599	0.283931		ENSMUSG00000022099	Dmtn	0	0.851389	1.80424	0.189975		ENSMUSG00000043008	Klhl6	0	0.283645	1.21727	0.538073		ENSMUSG00000000957	Mmp14	0	0.323681	1.25152	1
	ENSMUSG00000026482	Rgl1	0	0.700279	1.62482	0.0703278		ENSMUSG00000026126	Ptpn18	1	0.850691	1.80336	1.31827e-07		ENSMUSG00000022387	Brd1	0	0.283637	1.21726	0.454202		ENSMUSG00000028525	Pde4b	0	0.323412	1.25129	0.994148
	ENSMUSG00000040093	Bmf	0	0.699947	1.62444	0.0536164		ENSMUSG00000038264	Sema7a	1	0.849856	1.80232	2.61857e-05		ENSMUSG00000026113	Inpp4a	0	0.283395	1.21706	0.447011		ENSMUSG00000076609	Igkc	0	0.322926	1.25087	1
	ENSMUSG00000054843	Atrnl1	1	0.698629	1.62296	1.35682e-05		ENSMUSG00000027160	Ccdc34	1	0.848957	1.8012	0.000239127		ENSMUSG00000074909	Ranbp6	0	0.283385	1.21705	0.726622		ENSMUSG00000038213	Tapbpl	0	0.322338	1.25036	0.826587
	ENSMUSG00000047880	Cxcr5	0	0.697082	1.62122	0.322032		ENSMUSG00000029474	Rnf34	1	0.848629	1.80079	5.31522e-08		ENSMUSG00000113165	Gm47863	0	0.283143	1.21684	0.722814		ENSMUSG00000093765	Gm20658	0	0.322192	1.25023	1
	ENSMUSG00000025889	Snca	0	0.696739	1.62084	0.245752		ENSMUSG00000034278	Dnajc17	1	0.848549	1.80069	0.00103471		ENSMUSG00000020261	Slc36a1	0	0.282888	1.21663	0.570236		ENSMUSG00000049307	Fut4	0	0.322184	1.25022	1
	ENSMUSG00000004633	Chn2	0	0.696574	1.62065	0.15153		ENSMUSG00000105504	Gbp5	0	0.848382	1.80048	0.177734		ENSMUSG00000029056	Pank4	0	0.282443	1.21625	0.705249		ENSMUSG00000051550	Zfp579	0	0.32203	1.25009	1
	ENSMUSG00000020982	Nemf	1	0.693965	1.61772	0.000940852		ENSMUSG00000030921	Trim30a	1	0.848083	1.80011	7.29711e-05		ENSMUSG00000021384	Susd3	0	0.282349	1.21617	0.739139		ENSMUSG00000009248	Ascl2	0	0.322	1.25006	1
	ENSMUSG00000042595	Fam199x	0	0.693067	1.61672	0.270476		ENSMUSG00000021728	Emb	1	0.847637	1.79955	3.46238e-08		ENSMUSG00000004661	Arid3b	0	0.282125	1.21598	0.605312		ENSMUSG00000021733	Slc4a7	0	0.321688	1.24979	1
	ENSMUSG00000047798	Cd300lf	1	0.692821	1.61644	4.60739e-05		ENSMUSG00000079523	Tmsb10	1	0.847305	1.79914	3.36814e-05		ENSMUSG00000023947	Nfkbie	0	0.281991	1.21587	0.550277		ENSMUSG00000020798	Spns3	0	0.321358	1.24951	1
	ENSMUSG00000053411	Cbx7	0	0.692322	1.61588	0.187561		ENSMUSG00000022969	Il10rb	1	0.846604	1.79826	1.34836e-09		ENSMUSG00000030769	Slc5a11	0	0.281871	1.21577	0.702071		ENSMUSG00000003526	Prodh	0	0.321281	1.24944	1
	ENSMUSG00000076577	Igkv8-30	0	0.691132	1.61455	0.594146		ENSMUSG00000030579	Tyrobp	1	0.846233	1.7978	1.70438e-06		ENSMUSG00000049643	2310022A10Rik	0	0.281864	1.21576	0.571886		ENSMUSG00000039787	Cercam	0	0.320564	1.24882	1
	ENSMUSG00000026981	Il1rn	1	0.691127	1.61454	0.000247373		ENSMUSG00000033379	Atp6v0b	1	0.843707	1.79466	2.23666e-09		ENSMUSG00000049562	Ap5b1	0	0.281855	1.21576	0.582693		ENSMUSG00000031387	Renbp	0	0.320494	1.24876	1
	ENSMUSG00000073889	Il11ra1	1	0.690171	1.61348	0.0343389		ENSMUSG00000093661	Eif4e3	1	0.843522	1.79443	1.98101e-05		ENSMUSG00000024899	Papss2	0	0.281157	1.21517	0.814088		ENSMUSG00000040860	Crocc	0	0.320227	1.24853	1
	ENSMUSG00000112023	Lilr4b	1	0.689866	1.61313	9.35199e-05		ENSMUSG00000014850	Msh3	1	0.843445	1.79433	0.0162779		ENSMUSG00000029578	Wipi2	0	0.280892	1.21495	0.466591		ENSMUSG00000060147	Serpinb6a	0	0.319858	1.24821	0.877929
	ENSMUSG00000064337	mt-Rnr1	1	0.689676	1.61292	7.07791e-07		ENSMUSG00000032112	Trappc4	1	0.84335	1.79421	2.89483e-09		ENSMUSG00000034761	Map4k5	0	0.280848	1.21491	0.790424		ENSMUSG00000097113	Gm19705	0	0.319702	1.24807	1
	ENSMUSG00000032596	Uba7	1	0.689484	1.61271	9.09936e-06		ENSMUSG00000063524	Eno1	1	0.843302	1.79415	1.54232e-09		ENSMUSG00000031826	Usp10	0	0.280824	1.21489	0.683849		ENSMUSG00000001627	Ifrd1	0	0.319644	1.24802	1
	ENSMUSG00000037363	Letm2	1	0.688666	1.61179	0.011921		ENSMUSG00000000489	Pdgfb	0	0.841759	1.79223	0.117142		ENSMUSG00000034312	Iqsec1	0	0.280788	1.21486	0.623682		ENSMUSG00000037217	Syn1	0	0.319506	1.2479	1
	ENSMUSG00000010358	Ifi35	1	0.688653	1.61178	8.08046e-06		ENSMUSG00000038717	Atp5l	1	0.841254	1.79161	6.90709e-07		ENSMUSG00000020821	Kif1c	0	0.280788	1.21486	0.471154		ENSMUSG00000011263	Exoc3l2	0	0.319207	1.24764	1
	ENSMUSG00000000594	Gm2a	1	0.688197	1.61127	4.15314e-06		ENSMUSG00000032253	Phip	1	0.841218	1.79156	1.83004e-05		ENSMUSG00000022526	Zfp251	0	0.28077	1.21484	0.801285		ENSMUSG00000024403	Atp6v1g2	0	0.318889	1.24737	1
	ENSMUSG00000029798	Herc6	1	0.686955	1.60988	0.0203839		ENSMUSG00000022564	Grina	1	0.838424	1.7881	2.91755e-06		ENSMUSG00000026579	F5	0	0.280638	1.21473	0.43289		ENSMUSG00000042476	Abcb4	0	0.318574	1.2471	1
	ENSMUSG00000036905	C1qb	1	0.686316	1.60917	0.0106729		ENSMUSG00000034652	Cd300a	1	0.838175	1.78779	1.07236e-08		ENSMUSG00000047793	Sned1	0	0.280425	1.21455	0.775097		ENSMUSG00000000440	Pparg	0	0.317923	1.24653	1
	ENSMUSG00000016503	Gtf3a	1	0.686182	1.60902	0.00897102		ENSMUSG00000026104	Stat1	1	0.836507	1.78572	1.47025e-11		ENSMUSG00000059555	Tor4a	0	0.280331	1.21447	0.555652		ENSMUSG00000014873	Surf2	0	0.317788	1.24642	1
	ENSMUSG00000031662	Snx20	1	0.685989	1.6088	1.82279e-05		ENSMUSG00000111478	Gm18251	1	0.834972	1.78382	0.00973856		ENSMUSG00000001280	Sp1	0	0.280301	1.21445	0.474383		ENSMUSG00000105139	Gm19391	0	0.317397	1.24608	1
	ENSMUSG00000018381	Abi3	1	0.684585	1.60724	0.000298229		ENSMUSG00000070605	Zfp992	0	0.834848	1.78367	0.050224		ENSMUSG00000096054	Syne1	0	0.280044	1.21423	0.509743		ENSMUSG00000047180	Neurl3	0	0.317302	1.246	1
	ENSMUSG00000002885	Adgre5	1	0.683646	1.60619	0.0051484		ENSMUSG00000042369	Rbm45	1	0.834443	1.78317	8.9712e-06		ENSMUSG00000002325	Irf9	0	0.279863	1.21408	0.657711		ENSMUSG00000026637	Traf5	0	0.317141	1.24586	1
	ENSMUSG00000058715	Fcer1g	1	0.683491	1.60602	3.38513e-05		ENSMUSG00000045867	Cradd	1	0.83289	1.78125	0.00729543		ENSMUSG00000039959	Hip1	0	0.279765	1.214	0.679251		ENSMUSG00000093661	Eif4e3	0	0.317118	1.24584	1
	ENSMUSG00000013974	Mcemp1	1	0.681983	1.60434	0.000358619		ENSMUSG00000025825	Iscu	1	0.832512	1.78078	3.07861e-07		ENSMUSG00000067722	BC003965	0	0.279516	1.21379	0.715028		ENSMUSG00000028232	Tmem68	0	0.316342	1.24517	1
	ENSMUSG00000030108	Slc6a13	0	0.681909	1.60426	0.0641618		ENSMUSG00000048163	Selplg	1	0.832096	1.78027	7.57769e-07		ENSMUSG00000009035	Tmem184b	0	0.279424	1.21371	0.542555		ENSMUSG00000027452	Acss1	0	0.315973	1.24485	1
	ENSMUSG00000000244	Tspan32	1	0.6819	1.60425	1.75015e-06		ENSMUSG00000014748	Tex261	1	0.831715	1.7798	4.97377e-10		ENSMUSG00000048232	Fbxo10	0	0.279358	1.21365	0.490598		ENSMUSG00000005802	Slc30a4	0	0.315912	1.2448	1
	ENSMUSG00000054435	Gimap4	0	0.681635	1.60396	0.18324		ENSMUSG00000062906	Hdac10	1	0.829704	1.77732	0.000355008		ENSMUSG00000035284	Vps13c	0	0.279253	1.21357	0.509743		ENSMUSG00000040771	Oard1	0	0.315305	1.24427	1
	ENSMUSG00000064225	Paqr9	0	0.681428	1.60373	0.20197		ENSMUSG00000027200	Sema6d	0	0.827834	1.77502	0.0601102		ENSMUSG00000035208	Slfn8	0	0.279103	1.21344	0.739086		ENSMUSG00000037999	Arap2	0	0.315109	1.24411	1
	ENSMUSG00000025161	Slc16a3	1	0.681326	1.60361	0.000834755		ENSMUSG00000064339	mt-Rnr2	1	0.827707	1.77486	2.04295e-08		ENSMUSG00000041538	H2-Ob	0	0.278865	1.21324	0.855476		ENSMUSG00000038271	Iffo1	0	0.315027	1.24404	1
	ENSMUSG00000071713	Csf2rb	1	0.680826	1.60306	1.88357e-05		ENSMUSG00000087331	1810021B22Rik	1	0.827503	1.77461	0.00423793		ENSMUSG00000069892	9930111J21Rik2	0	0.278821	1.2132	0.56911		ENSMUSG00000072875	Gpr27	0	0.314818	1.24386	1
	ENSMUSG00000015850	Adamtsl4	1	0.680483	1.60268	0.0154962		ENSMUSG00000024663	Rab3il1	1	0.826089	1.77287	0.0315335		ENSMUSG00000055053	Nfic	0	0.278525	1.21295	0.447011		ENSMUSG00000031871	Cdh5	0	0.314442	1.24353	1
	ENSMUSG00000040253	Gbp7	1	0.679849	1.60197	4.27324e-07		ENSMUSG00000112023	Lilr4b	1	0.825732	1.77243	6.90756e-07		ENSMUSG00000056204	Pgpep1	0	0.278153	1.21264	0.726828		ENSMUSG00000026470	Stx6	0	0.313974	1.24313	0.747435
	ENSMUSG00000039013	Siglecf	1	0.679441	1.60152	0.0177273		ENSMUSG00000027333	Smox	1	0.825662	1.77235	1.84474e-06		ENSMUSG00000028952	Zbtb48	0	0.278018	1.21253	0.816469		ENSMUSG00000040429	Mterf1a	0	0.313479	1.2427	1
	ENSMUSG00000045551	Fpr1	1	0.677159	1.59899	0.000940828		ENSMUSG00000116858	Gm49797	1	0.825523	1.77218	0.0223956		ENSMUSG00000059713	Rcan3	0	0.277818	1.21236	0.658245		ENSMUSG00000024983	Vti1a	0	0.312634	1.24197	0.804589
	ENSMUSG00000026986	Hnmt	1	0.676265	1.598	0.00305133		ENSMUSG00000058755	Osm	1	0.824991	1.77152	0.00022505		ENSMUSG00000014547	Wdfy2	0	0.27769	1.21225	0.555652		ENSMUSG00000033174	Mgll	0	0.312599	1.24194	0.826587
	ENSMUSG00000040472	Rabggta	1	0.674974	1.59657	0.00026416		ENSMUSG00000096490	Igkv10-94	0	0.824474	1.77089	0.548885		ENSMUSG00000031378	Abcd1	0	0.277631	1.2122	0.488183		ENSMUSG00000108291	Gm44292	0	0.312399	1.24177	1
	ENSMUSG00000026568	Mpc2	1	0.674908	1.59649	0.000169665		ENSMUSG00000026946	Nmi	1	0.823264	1.7694	2.12316e-07		ENSMUSG00000057637	Prdm2	0	0.276899	1.21159	0.604159		ENSMUSG00000010142	Tnfrsf13b	0	0.312377	1.24175	1
	ENSMUSG00000062054	Iah1	1	0.674732	1.5963	0.000694558		ENSMUSG00000002233	Rhoc	1	0.822832	1.76887	0.000807671		ENSMUSG00000041977	Arhgef11	0	0.276739	1.21145	0.550929		ENSMUSG00000062729	Ppox	0	0.312225	1.24162	1
	ENSMUSG00000060063	Alox5ap	1	0.674689	1.59625	9.29591e-07		ENSMUSG00000028730	Cfap57	1	0.821737	1.76753	0.0164731		ENSMUSG00000050786	Ccdc126	0	0.276685	1.21141	0.674172		ENSMUSG00000097572	Gm26797	0	0.312069	1.24149	1
	ENSMUSG00000037913	Tmem156	1	0.674603	1.59616	0.00715672		ENSMUSG00000028248	Pnisr	1	0.82146	1.76719	7.95422e-05		ENSMUSG00000024130	Abca3	0	0.27653	1.21128	0.56911		ENSMUSG00000021120	Pigh	0	0.311959	1.24139	1
	ENSMUSG00000030203	Dusp16	1	0.674386	1.59592	0.0456783		ENSMUSG00000053846	Lipg	0	0.821033	1.76667	0.071879		ENSMUSG00000066440	Zfyve26	0	0.276514	1.21126	0.636		ENSMUSG00000033157	Abhd10	0	0.311955	1.24139	1
	ENSMUSG00000101599	Gm20342	0	0.67424	1.59576	0.15722		ENSMUSG00000026482	Rgl1	1	0.820431	1.76593	0.0214137		ENSMUSG00000073609	D2hgdh	0	0.276513	1.21126	0.611394		ENSMUSG00000097536	2610037D02Rik	0	0.311452	1.24096	1
	ENSMUSG00000035181	Heatr5a	1	0.674116	1.59562	9.53516e-06		ENSMUSG00000097113	Gm19705	1	0.819939	1.76533	0.00115972		ENSMUSG00000030016	Zfp638	0	0.276199	1.211	0.595189		ENSMUSG00000059336	Slc14a1	0	0.311353	1.24087	1
	ENSMUSG00000021905	Dph3	1	0.674024	1.59552	3.38493e-06		ENSMUSG00000095630	Igkv6-23	0	0.819763	1.76512	0.139054		ENSMUSG00000053436	Mapk14	0	0.276186	1.21099	0.457847		ENSMUSG00000031097	Tnni2	0	0.311339	1.24086	1
	ENSMUSG00000115869	Gm31814	0	0.673721	1.59518	0.063795		ENSMUSG00000001062	Vps9d1	1	0.819706	1.76505	3.93964e-06		ENSMUSG00000030107	Usp18	0	0.276144	1.21095	0.773409		ENSMUSG00000036278	Macrod1	0	0.311022	1.24059	1
	ENSMUSG00000049285	Mblac1	0	0.673717	1.59518	0.089916		ENSMUSG00000070493	Chchd2	1	0.819369	1.76463	1.00918e-12		ENSMUSG00000031995	St14	0	0.275937	1.21078	0.699057		ENSMUSG00000060244	Alyref2	0	0.311002	1.24057	1
	ENSMUSG00000028995	Fam126a	1	0.671988	1.59327	0.000104073		ENSMUSG00000018509	Cenpv	0	0.818868	1.76402	0.0543649		ENSMUSG00000032763	Ilvbl	0	0.275891	1.21074	0.669912		ENSMUSG00000033857	Engase	0	0.311002	1.24057	1
	ENSMUSG00000086158	Ccpg1os	0	0.671877	1.59314	0.181188		ENSMUSG00000047747	Rnf150	1	0.818599	1.76369	0.0490785		ENSMUSG00000061186	Sfmbt2	0	0.275706	1.21059	0.704148		ENSMUSG00000094685	Gm5900	0	0.310956	1.24053	1
	ENSMUSG00000056531	Ccdc18	0	0.671506	1.59273	0.256516		ENSMUSG00000047180	Neurl3	1	0.817996	1.76296	8.59956e-06		ENSMUSG00000067825	Pex26	0	0.27554	1.21045	0.814695		ENSMUSG00000118145	AC131675.2	0	0.310632	1.24025	1
	ENSMUSG00000037683	Armc3	1	0.671293	1.5925	0.0395556		ENSMUSG00000029372	Ppbp	0	0.817029	1.76177	0.230967		ENSMUSG00000024776	Stambpl1	0	0.275504	1.21042	0.561909		ENSMUSG00000059479	B3gnt8	0	0.310378	1.24003	1
	ENSMUSG00000022412	Mief1	1	0.671085	1.59227	3.28334e-05		ENSMUSG00000058715	Fcer1g	1	0.815627	1.76006	1.64376e-07		ENSMUSG00000079469	Pigb	0	0.275503	1.21042	0.611074		ENSMUSG00000031995	St14	0	0.310359	1.24002	1
	ENSMUSG00000025981	Coq10b	1	0.6707	1.59185	0.000618117		ENSMUSG00000030742	Lat	1	0.814691	1.75892	0.0406827		ENSMUSG00000098112	Bin2	0	0.274986	1.20998	0.6083		ENSMUSG00000006574	Slc4a1	0	0.310308	1.23997	1
	ENSMUSG00000039264	Gimap3	0	0.670466	1.59159	0.296614		ENSMUSG00000036931	Nfkbid	1	0.814681	1.75891	0.000770432		ENSMUSG00000021481	Zfp346	0	0.274977	1.20997	0.695543		ENSMUSG00000057894	Zfp329	0	0.3103	1.23997	1
	ENSMUSG00000038507	Parp12	1	0.669409	1.59042	0.000783204		ENSMUSG00000047181	Samd14	0	0.813716	1.75773	0.106158		ENSMUSG00000074497	A430078G23Rik	0	0.274882	1.20989	0.658245		ENSMUSG00000026712	Mrc1	0	0.310278	1.23995	1
	ENSMUSG00000029810	Tmem176b	0	0.668685	1.58962	0.0860547		ENSMUSG00000091955	Gm9844	1	0.813693	1.75771	0.00213286		ENSMUSG00000025702	March8	0	0.27483	1.20985	0.441677		ENSMUSG00000071561	BC100530	0	0.3102	1.23988	1
	ENSMUSG00000030069	Prok2	1	0.667005	1.58777	0.0234917		ENSMUSG00000032515	Csrnp1	1	0.812984	1.75684	4.05799e-10		ENSMUSG00000052087	Rgs14	0	0.274761	1.20979	0.582693		ENSMUSG00000104351	Gm37125	0	0.309964	1.23968	1
	ENSMUSG00000039031	Arhgap18	1	0.666413	1.58712	0.000475918		ENSMUSG00000044786	Zfp36	1	0.81281	1.75663	8.55732e-05		ENSMUSG00000092118	Fancf	0	0.2746	1.20966	0.855928		ENSMUSG00000046330	Rpl37a	0	0.308767	1.23865	1
	ENSMUSG00000043939	A530064D06Rik	1	0.666339	1.58704	0.00160443		ENSMUSG00000086564	Cd101	1	0.811613	1.75517	0.00136352		ENSMUSG00000029860	Zyx	0	0.274378	1.20947	0.59377		ENSMUSG00000038822	Hace1	0	0.308349	1.23829	1
	ENSMUSG00000024610	Cd74	1	0.666074	1.58675	0.0211705		ENSMUSG00000079505	Gm11131	1	0.810497	1.75381	0.0138425		ENSMUSG00000095115	Itpripl2	0	0.273918	1.20909	0.550929		ENSMUSG00000063019	Manbal	0	0.308063	1.23804	1
	ENSMUSG00000015243	Abca1	0	0.66457	1.5851	0.0510603		ENSMUSG00000041453	Rpl21	1	0.810418	1.75372	2.10372e-05		ENSMUSG00000050188	Lsm10	0	0.273721	1.20892	0.599288		ENSMUSG00000062519	Zfp398	0	0.307431	1.2375	1
	ENSMUSG00000031825	Crispld2	1	0.663943	1.58441	0.00434308		ENSMUSG00000037921	Ddx60	1	0.809659	1.7528	7.72708e-05		ENSMUSG00000036611	Eepd1	0	0.27364	1.20885	0.570236		ENSMUSG00000032324	Tspan3	0	0.30707	1.23719	1
	ENSMUSG00000026107	Nabp1	1	0.663728	1.58417	9.10392e-05		ENSMUSG00000028843	Sh3bgrl3	1	0.809155	1.75218	4.42377e-08		ENSMUSG00000014426	Map3k4	0	0.273157	1.20845	0.670293		ENSMUSG00000044811	Cd300c2	0	0.306842	1.237	1
	ENSMUSG00000037321	Tap1	1	0.66299	1.58336	4.7788e-07		ENSMUSG00000018858	Mrpl58	1	0.808897	1.75187	9.49515e-06		ENSMUSG00000046020	Pofut1	0	0.273001	1.20832	0.48715		ENSMUSG00000050232	Cxcr3	0	0.306784	1.23695	1
	ENSMUSG00000074622	Mafb	0	0.662529	1.58285	0.0852238		ENSMUSG00000025328	Padi3	0	0.808799	1.75175	0.0714425		ENSMUSG00000040268	Plekha1	0	0.272896	1.20823	0.749273		ENSMUSG00000043801	Oaz1-ps	0	0.306596	1.23679	1
	ENSMUSG00000021114	Atp6v1d	1	0.661233	1.58143	3.08515e-06		ENSMUSG00000025035	Arl3	1	0.808783	1.75173	0.000965659		ENSMUSG00000047153	Khnyn	0	0.272863	1.2082	0.5086		ENSMUSG00000070858	Gm1673	0	0.306595	1.23679	1
	ENSMUSG00000039814	Xkr5	1	0.660599	1.58074	0.0247971		ENSMUSG00000003380	Rabac1	1	0.80852	1.75141	4.19087e-08		ENSMUSG00000031101	Sash3	0	0.272855	1.2082	0.490598		ENSMUSG00000019842	Traf3ip2	0	0.306418	1.23663	1
	ENSMUSG00000073664	Nbeal1	0	0.660217	1.58032	0.134257		ENSMUSG00000024325	Ring1	1	0.806939	1.7495	0.000922116		ENSMUSG00000002052	Supt6	0	0.272803	1.20815	0.418114		ENSMUSG00000067199	Frat1	0	0.306309	1.23654	0.811886
	ENSMUSG00000009292	Trpm2	1	0.658408	1.57834	0.000157115		ENSMUSG00000030413	Pglyrp1	1	0.806394	1.74883	1.81587e-06		ENSMUSG00000005198	Polr2a	0	0.272649	1.20802	0.447011		ENSMUSG00000066892	Fbxl12	0	0.305921	1.23621	1
	ENSMUSG00000086564	Cd101	1	0.658181	1.57809	0.0164022		ENSMUSG00000038178	Slc43a2	1	0.805513	1.74777	3.23472e-08		ENSMUSG00000070002	Ell	0	0.272385	1.2078	0.562821		ENSMUSG00000024399	Ltb	0	0.305796	1.2361	1
	ENSMUSG00000051212	Gpr183	0	0.657878	1.57776	0.188866		ENSMUSG00000062101	Zfp119b	1	0.804038	1.74598	0.00198154		ENSMUSG00000046541	Zfp526	0	0.272092	1.20756	0.699057		ENSMUSG00000017009	Sdc4	0	0.305238	1.23562	1
	ENSMUSG00000006019	Dhx34	1	0.6577	1.57757	4.51901e-05		ENSMUSG00000036199	Ndufa13	1	0.803408	1.74522	1.83623e-05		ENSMUSG00000052539	Magi3	0	0.272092	1.20756	0.662997		ENSMUSG00000057133	Chd6	0	0.305042	1.23545	1
	ENSMUSG00000067722	BC003965	1	0.657571	1.57742	0.0210412		ENSMUSG00000018417	Myo1b	1	0.802048	1.74357	0.0194468		ENSMUSG00000021189	Atxn3	0	0.271898	1.2074	0.573337		ENSMUSG00000020032	Nuak1	0	0.305024	1.23544	1
	ENSMUSG00000027907	S100a11	1	0.657119	1.57693	0.000287471		ENSMUSG00000032212	Sltm	1	0.801834	1.74332	4.16229e-08		ENSMUSG00000033356	Pus7l	0	0.271751	1.20727	0.821113		ENSMUSG00000099764	Rps10-ps2	0	0.304885	1.23532	1
	ENSMUSG00000015016	Acsf3	0	0.656967	1.57676	0.0505913		ENSMUSG00000049866	Arl4c	1	0.799877	1.74095	0.00010852		ENSMUSG00000037846	Rtkn2	0	0.27156	1.20711	0.63165		ENSMUSG00000097354	2310001H17Rik	0	0.304707	1.23517	1
	ENSMUSG00000039157	Fam102a	1	0.655689	1.57537	9.59834e-06		ENSMUSG00000103520	1110025M09Rik	0	0.799803	1.74086	0.116121		ENSMUSG00000026035	Ppil3	0	0.271535	1.20709	0.67009		ENSMUSG00000079164	Tlr5	0	0.304521	1.23501	1
	ENSMUSG00000044991	Shld1	1	0.65558	1.57525	0.040242		ENSMUSG00000001065	Zfp276	1	0.799528	1.74053	6.10149e-06		ENSMUSG00000028927	Padi2	0	0.271509	1.20707	0.760626		ENSMUSG00000056938	Acbd4	0	0.304447	1.23495	1
	ENSMUSG00000022849	Hspbap1	1	0.655215	1.57485	0.017926		ENSMUSG00000052446	Zfp961	1	0.798988	1.73988	0.00169955		ENSMUSG00000070858	Gm1673	0	0.271344	1.20693	0.847096		ENSMUSG00000079575	Rbpj-ps3	0	0.304353	1.23487	1
	ENSMUSG00000067719	Gm10221	0	0.654251	1.5738	0.192114		ENSMUSG00000000682	Cd52	1	0.798521	1.73932	5.05509e-07		ENSMUSG00000055452	Gm7353	0	0.271209	1.20682	0.824963		ENSMUSG00000049092	Gpr137c	0	0.304172	1.23471	1
	ENSMUSG00000056370	Sftpb	0	0.653488	1.57297	0.123333		ENSMUSG00000075486	Commd6	1	0.798431	1.73921	1.95342e-05		ENSMUSG00000067199	Frat1	0	0.271206	1.20682	0.515707		ENSMUSG00000024381	Bin1	0	0.304171	1.23471	1
	ENSMUSG00000041453	Rpl21	1	0.653079	1.57252	0.00141142		ENSMUSG00000026994	Galnt3	1	0.796727	1.73716	0.000116886		ENSMUSG00000034300	Fam53c	0	0.271091	1.20672	0.471154		ENSMUSG00000020785	Camkk1	0	0.30414	1.23468	1
	ENSMUSG00000037344	Slc12a9	1	0.652977	1.57241	4.33525e-06		ENSMUSG00000039105	Atp6v1g1	1	0.796699	1.73712	2.77133e-05		ENSMUSG00000048154	Kmt2d	0	0.270729	1.20642	0.610889		ENSMUSG00000076532	Igkv4-91	0	0.304114	1.23466	1
	ENSMUSG00000017002	Slpi	1	0.651333	1.57062	0.00103857		ENSMUSG00000051748	Wfdc21	1	0.796391	1.73675	1.6126e-05		ENSMUSG00000075284	Wipf1	0	0.270728	1.20642	0.588349		ENSMUSG00000013089	Etv5	0	0.303707	1.23431	1
	ENSMUSG00000024325	Ring1	1	0.651308	1.57059	0.0130178		ENSMUSG00000006494	Pdk1	1	0.796096	1.7364	0.0396751		ENSMUSG00000035828	Pim3	0	0.270719	1.20641	0.763282		ENSMUSG00000015854	Cd5l	0	0.303697	1.2343	1
	ENSMUSG00000030929	Eri2	1	0.651271	1.57055	0.0230237		ENSMUSG00000026749	Nek6	1	0.795602	1.7358	8.95754e-05		ENSMUSG00000020143	Dock2	0	0.27071	1.2064	0.482019		ENSMUSG00000043510	Hscb	0	0.303598	1.23422	1
	ENSMUSG00000003752	Itpkc	1	0.650319	1.56952	0.0202749		ENSMUSG00000035595	1600002K03Rik	0	0.794896	1.73495	0.0947056		ENSMUSG00000086894	Gm15708	0	0.270517	1.20624	0.789775		ENSMUSG00000029162	Khk	0	0.303492	1.23413	1
	ENSMUSG00000114554	5430425K12Rik	0	0.649818	1.56897	0.205901		ENSMUSG00000009549	Srp14	1	0.794034	1.73392	1.00415e-10		ENSMUSG00000027073	Prg2	0	0.270503	1.20623	0.816469		ENSMUSG00000070369	Itgad	0	0.303387	1.23404	1
	ENSMUSG00000030706	Mrpl48	1	0.649158	1.56825	2.6479e-05		ENSMUSG00000020407	Upp1	1	0.793963	1.73383	0.000870255		ENSMUSG00000038352	Arl5c	0	0.270381	1.20613	0.796928		ENSMUSG00000117379	AC166102.1	0	0.303114	1.2338	1
	ENSMUSG00000100153	Ppp1ccb	0	0.648997	1.56808	0.0941278		ENSMUSG00000034714	Ttyh2	0	0.793471	1.73324	0.0714776		ENSMUSG00000017737	Mmp9	0	0.269851	1.20568	0.67009		ENSMUSG00000067071	Hes6	0	0.301897	1.23276	1
	ENSMUSG00000020205	Phlda1	1	0.648956	1.56803	0.0164901		ENSMUSG00000030590	Fam98c	1	0.793459	1.73323	0.0026277		ENSMUSG00000043940	Wdfy3	0	0.26982	1.20566	0.474383		ENSMUSG00000027078	Ube2l6	0	0.30168	1.23258	0.755361
	ENSMUSG00000023913	Pla2g7	1	0.648949	1.56803	0.00034981		ENSMUSG00000116564	Riok2	1	0.792809	1.73244	0.000707741		ENSMUSG00000033335	Dnm2	0	0.269793	1.20563	0.546059		ENSMUSG00000015312	Gadd45b	0	0.301291	1.23225	1
	ENSMUSG00000028977	Casz1	1	0.648529	1.56757	0.000666754		ENSMUSG00000042677	Zc3h12a	1	0.792162	1.73167	0.0168546		ENSMUSG00000110279	Gm45552	0	0.269671	1.20553	0.79537		ENSMUSG00000026177	Slc11a1	0	0.301142	1.23212	1
	ENSMUSG00000052748	Swt1	1	0.648092	1.56709	0.00585271		ENSMUSG00000038085	Cnbd2	1	0.791558	1.73094	0.00487603		ENSMUSG00000035901	Dennd5a	0	0.269287	1.20521	0.478207		ENSMUSG00000031521	Aga	0	0.300925	1.23193	1
	ENSMUSG00000061878	Sphk1	0	0.64795	1.56694	0.321779		ENSMUSG00000026162	Nhej1	1	0.790791	1.73002	0.000138158		ENSMUSG00000038949	Cnst	0	0.269166	1.20511	0.507743		ENSMUSG00000021226	Acot2	0	0.30091	1.23192	1
	ENSMUSG00000078153	Psme2b	0	0.647477	1.56643	0.196497		ENSMUSG00000035585	Tsen34	1	0.790028	1.72911	3.36011e-09		ENSMUSG00000034135	Sik3	0	0.269161	1.20511	0.466591		ENSMUSG00000018698	Lhx1	0	0.300514	1.23158	1
	ENSMUSG00000054309	Cpsf3	1	0.644788	1.56351	1.10773e-06		ENSMUSG00000019362	D8Ertd738e	1	0.789797	1.72883	9.98135e-08		ENSMUSG00000053469	Tg	0	0.269135	1.20508	0.79537		ENSMUSG00000021702	Thbs4	0	0.300446	1.23152	1
	ENSMUSG00000073609	D2hgdh	1	0.644034	1.56269	0.00168323		ENSMUSG00000084806	Gm15232	1	0.789499	1.72847	0.00583076		ENSMUSG00000038914	Dido1	0	0.268975	1.20495	0.491803		ENSMUSG00000050732	Vamp8	0	0.300129	1.23125	1
	ENSMUSG00000061028	Clasrp	1	0.643543	1.56216	5.70795e-05		ENSMUSG00000027940	Tpm3	1	0.789374	1.72832	8.44587e-12		ENSMUSG00000031824	6430548M08Rik	0	0.268888	1.20488	0.53111		ENSMUSG00000071793	2610005L07Rik	0	0.299953	1.2311	1
	ENSMUSG00000028861	Mrps15	1	0.643434	1.56204	5.87679e-09		ENSMUSG00000042682	Selenok	1	0.789232	1.72815	5.38577e-10		ENSMUSG00000042594	Sh2b3	0	0.268841	1.20484	0.43289		ENSMUSG00000037525	Bcdin3d	0	0.299784	1.23096	1
	ENSMUSG00000028525	Pde4b	1	0.643218	1.56181	0.000895347		ENSMUSG00000069045	Ddx3y	1	0.788511	1.72729	2.57967e-05		ENSMUSG00000044456	Rin3	0	0.268717	1.20474	0.596395		ENSMUSG00000034634	Ly6d	0	0.299626	1.23082	1
	ENSMUSG00000034973	Dop1a	1	0.642791	1.56135	0.000118909		ENSMUSG00000091931	Gon7	1	0.788163	1.72687	0.0144207		ENSMUSG00000042474	Fcmr	0	0.268623	1.20466	0.851292		ENSMUSG00000074580	4931440P22Rik	0	0.298868	1.23018	1
	ENSMUSG00000020305	Asb3	1	0.641271	1.5597	0.00380971		ENSMUSG00000022849	Hspbap1	1	0.787352	1.7259	0.00216332		ENSMUSG00000025278	Flnb	0	0.268593	1.20463	0.735161		ENSMUSG00000025743	Sdc3	0	0.298636	1.22998	1
	ENSMUSG00000037525	Bcdin3d	1	0.641123	1.55954	0.00666699		ENSMUSG00000031848	Lsm4	1	0.787135	1.72564	4.03376e-07		ENSMUSG00000030259	Rassf8	0	0.268575	1.20462	0.848624		ENSMUSG00000028821	Syf2	0	0.29809	1.22952	0.84355
	ENSMUSG00000025647	Shisa5	1	0.640824	1.55922	9.85905e-06		ENSMUSG00000036362	P2ry13	1	0.786548	1.72494	1.22924e-06		ENSMUSG00000044103	Il1f9	0	0.26856	1.20461	0.718054		ENSMUSG00000047507	Baiap3	0	0.29803	1.22946	1
	ENSMUSG00000035704	Alg8	0	0.640068	1.5584	0.118079		ENSMUSG00000037260	Hgsnat	1	0.785408	1.72358	2.47569e-09		ENSMUSG00000023055	Calcoco1	0	0.268516	1.20457	0.556772		ENSMUSG00000074141	Il4i1	0	0.297137	1.2287	1
	ENSMUSG00000045092	S1pr1	0	0.638526	1.55674	0.0740914		ENSMUSG00000020459	Mtif2	1	0.784613	1.72263	0.000367875		ENSMUSG00000040907	Atp1a3	0	0.268468	1.20453	0.617824		ENSMUSG00000035064	Eef2k	0	0.296696	1.22833	0.480555
	ENSMUSG00000092417	Gpank1	1	0.636623	1.55469	0.000441818		ENSMUSG00000021592	Arsk	1	0.784563	1.72257	0.0242234		ENSMUSG00000054293	P2ry10b	0	0.268389	1.20446	0.804033		ENSMUSG00000028619	Tceanc2	0	0.296695	1.22833	0.622331
	ENSMUSG00000020300	Cpeb4	1	0.635018	1.55296	0.0025815		ENSMUSG00000051184	Zfp524	1	0.78455	1.72256	0.0113277		ENSMUSG00000040250	Ints13	0	0.268132	1.20425	0.578302		ENSMUSG00000024673	Ms4a1	0	0.296346	1.22803	1
	ENSMUSG00000029084	Cd38	0	0.634766	1.55269	0.101421		ENSMUSG00000049285	Mblac1	1	0.784368	1.72234	0.0325619		ENSMUSG00000078942	Naip6	0	0.268014	1.20415	0.816662		ENSMUSG00000030590	Fam98c	0	0.296215	1.22792	1
	ENSMUSG00000117284	CT030661.1	1	0.632961	1.55074	0.0214466		ENSMUSG00000050552	Lamtor4	1	0.783751	1.7216	3.72227e-05		ENSMUSG00000020128	Vps54	0	0.267857	1.20402	0.538073		ENSMUSG00000087113	Gm11714	0	0.296181	1.22789	1
	ENSMUSG00000061815	Rufy4	1	0.632911	1.55069	0.0292024		ENSMUSG00000024737	Slc15a3	1	0.783198	1.72094	0.000177931		ENSMUSG00000033170	Card10	0	0.267802	1.20397	0.613369		ENSMUSG00000042625	Safb2	0	0.29593	1.22768	0.72435
	ENSMUSG00000031591	Asah1	1	0.63215	1.54987	5.36279e-08		ENSMUSG00000032519	Slc25a38	1	0.78289	1.72057	5.39669e-07		ENSMUSG00000018428	Akap1	0	0.267693	1.20388	0.895587		ENSMUSG00000030722	Nfatc2ip	0	0.295769	1.22754	1
	ENSMUSG00000050786	Ccdc126	1	0.631836	1.54954	0.0107325		ENSMUSG00000033773	Rpap2	0	0.782142	1.71968	0.0783709		ENSMUSG00000058427	Cxcl2	0	0.267477	1.2037	0.754894		ENSMUSG00000082284	H3f3a-ps1	0	0.29562	1.22741	1
	ENSMUSG00000111128	Gm49338	1	0.630734	1.54835	0.0499908		ENSMUSG00000074903	Gm2058	0	0.782086	1.71962	0.589168		ENSMUSG00000059970	Hspa2	0	0.267429	1.20366	0.791068		ENSMUSG00000003363	Pld3	0	0.295279	1.22712	1
	ENSMUSG00000017466	Timp2	1	0.63045	1.54805	0.000642537		ENSMUSG00000059498	Fcgr3	1	0.781759	1.71923	1.44029e-06		ENSMUSG00000060260	Pwwp2b	0	0.2674	1.20364	0.738602		ENSMUSG00000100755	Rps23-ps1	0	0.295189	1.22705	1
	ENSMUSG00000036026	Tmem63b	1	0.630365	1.54796	0.0389746		ENSMUSG00000105547	Iglc3	0	0.780989	1.71831	0.180806		ENSMUSG00000054509	Parp4	0	0.267016	1.20332	0.477442		ENSMUSG00000034614	Pik3ip1	0	0.29511	1.22698	1
	ENSMUSG00000032750	Gab3	1	0.628801	1.54628	0.000759072		ENSMUSG00000115816	Gm34589	1	0.780784	1.71806	0.00122176		ENSMUSG00000018500	Adora2b	0	0.266921	1.20324	0.916531		ENSMUSG00000063047	Zfp780b	0	0.294948	1.22684	1
	ENSMUSG00000046807	Lrrc75b	0	0.627789	1.5452	0.0785726		ENSMUSG00000027962	Vcam1	1	0.778409	1.71524	0.0248431		ENSMUSG00000030830	Itgal	0	0.266805	1.20314	0.509743		ENSMUSG00000032259	Drd2	0	0.294811	1.22672	1
	ENSMUSG00000022969	Il10rb	1	0.627425	1.54481	2.59286e-05		ENSMUSG00000030706	Mrpl48	1	0.778116	1.71489	1.14256e-07		ENSMUSG00000036986	Pml	0	0.266629	1.20299	0.57564		ENSMUSG00000054405	Dnajc8	0	0.29463	1.22657	0.881778
	ENSMUSG00000044092	C130050O18Rik	1	0.627155	1.54452	0.000145521		ENSMUSG00000002395	Use1	1	0.776722	1.71323	4.24267e-08		ENSMUSG00000031833	Mast3	0	0.266607	1.20298	0.509743		ENSMUSG00000047246	Hist1h2be	0	0.294386	1.22636	1
	ENSMUSG00000027430	Dtd1	1	0.626139	1.54343	0.0054099		ENSMUSG00000024044	Epb41l3	1	0.776003	1.71238	0.0277943		ENSMUSG00000071547	Nt5dc2	0	0.2666	1.20297	0.674081		ENSMUSG00000030410	Dmwd	0	0.293333	1.22547	1
	ENSMUSG00000020604	Arsg	1	0.626057	1.54334	0.000212914		ENSMUSG00000036299	BC031181	1	0.775545	1.71184	1.39488e-07		ENSMUSG00000026986	Hnmt	0	0.266469	1.20286	0.67009		ENSMUSG00000078570	1110065P20Rik	0	0.293191	1.22535	1
	ENSMUSG00000025094	Slc18a2	0	0.625367	1.5426	0.310665		ENSMUSG00000024691	Fam111a	1	0.775023	1.71122	1.47137e-07		ENSMUSG00000002083	Bbc3	0	0.265603	1.20214	0.735161		ENSMUSG00000016940	Kctd2	0	0.293162	1.22532	1
	ENSMUSG00000074212	Dnajb14	1	0.624551	1.54173	1.08022e-06		ENSMUSG00000030704	Rab6a	1	0.774047	1.71006	8.66162e-10		ENSMUSG00000042284	Itga1	0	0.265554	1.2021	0.835183		ENSMUSG00000050350	Gpr18	0	0.2931	1.22527	1
	ENSMUSG00000014856	Tmem208	1	0.624434	1.54161	0.000371686		ENSMUSG00000049608	Gpr55	0	0.773027	1.70885	0.169474		ENSMUSG00000030314	Atg7	0	0.26533	1.20191	0.57564		ENSMUSG00000031755	Bbs2	0	0.292764	1.22499	1
	ENSMUSG00000055435	Maf	0	0.624012	1.54116	0.104466		ENSMUSG00000039219	Arid4b	1	0.772908	1.70871	0.00282177		ENSMUSG00000021281	Tnfaip2	0	0.265293	1.20188	0.538073		ENSMUSG00000032652	Crebl2	0	0.29263	1.22487	1
	ENSMUSG00000042992	Borcs5	1	0.622569	1.53961	0.00634247		ENSMUSG00000044573	Acp1	1	0.770819	1.70624	3.11356e-06		ENSMUSG00000090673	Gm340	0	0.265049	1.20168	0.786327		ENSMUSG00000046329	Slc25a23	0	0.292544	1.2248	1
	ENSMUSG00000035208	Slfn8	1	0.622493	1.53953	0.0479419		ENSMUSG00000039031	Arhgap18	1	0.770788	1.7062	1.94286e-05		ENSMUSG00000009628	Tex15	0	0.265042	1.20167	0.521927		ENSMUSG00000091623	Gm17092	0	0.292235	1.22454	1
	ENSMUSG00000062906	Hdac10	1	0.622327	1.53936	0.013806		ENSMUSG00000021190	Lgmn	1	0.770612	1.70599	0.00279946		ENSMUSG00000029071	Dvl1	0	0.264778	1.20145	0.646834		ENSMUSG00000038332	Sesn1	0	0.292032	1.22436	1
	ENSMUSG00000041926	Rnpep	1	0.622301	1.53933	7.35753e-08		ENSMUSG00000028645	Slc2a1	1	0.769326	1.70447	0.000255339		ENSMUSG00000015127	Unkl	0	0.264749	1.20143	0.726455		ENSMUSG00000025978	Rftn2	0	0.291773	1.22414	1
	ENSMUSG00000040249	Lrp1	1	0.622185	1.5392	0.0258577		ENSMUSG00000020108	Ddit4	1	0.769265	1.7044	0.00154231		ENSMUSG00000052713	Zfp608	0	0.264623	1.20132	0.613369		ENSMUSG00000028104	Polr3gl	0	0.291665	1.22405	1
	ENSMUSG00000038646	Ramac	1	0.621847	1.53884	6.80823e-05		ENSMUSG00000001166	Oas1c	1	0.769218	1.70435	0.0123951		ENSMUSG00000037646	Vps13b	0	0.264495	1.20122	0.525352		ENSMUSG00000042675	Ypel3	0	0.291353	1.22379	1
	ENSMUSG00000038058	Nod1	1	0.618067	1.53482	1.87534e-05		ENSMUSG00000076258	Gm23935	1	0.769017	1.70411	0.000632897		ENSMUSG00000045551	Fpr1	0	0.264342	1.20109	0.637478		ENSMUSG00000030605	Mfge8	0	0.291286	1.22373	1
	ENSMUSG00000007891	Ctsd	1	0.617952	1.5347	0.000650182		ENSMUSG00000057666	Gapdh	1	0.768217	1.70316	3.89136e-07		ENSMUSG00000038894	Irs2	0	0.264239	1.201	0.611063		ENSMUSG00000076583	Igkv8-24	0	0.291047	1.22353	1
	ENSMUSG00000027200	Sema6d	0	0.61789	1.53463	0.203222		ENSMUSG00000071724	Smpd5	1	0.768108	1.70303	0.0251123		ENSMUSG00000028538	St3gal3	0	0.264139	1.20092	0.67009		ENSMUSG00000028076	Cd1d1	0	0.290701	1.22323	1
	ENSMUSG00000115026	Gm49041	1	0.617443	1.53415	0.046229		ENSMUSG00000091811	Inafm1	1	0.767361	1.70215	0.0389626		ENSMUSG00000042724	Map3k9	0	0.264114	1.2009	0.509743		ENSMUSG00000047843	Bri3	0	0.29042	1.223	1
	ENSMUSG00000042700	Sipa1l1	1	0.616921	1.5336	0.00692376		ENSMUSG00000078921	Tgtp2	0	0.766933	1.70165	0.104962		ENSMUSG00000035773	Kiss1r	0	0.264099	1.20089	0.745452		ENSMUSG00000040209	Zfp704	0	0.289984	1.22263	1
	ENSMUSG00000025743	Sdc3	1	0.616826	1.5335	0.041712		ENSMUSG00000044092	C130050O18Rik	1	0.766699	1.70137	8.55259e-07		ENSMUSG00000039501	Znfx1	0	0.263818	1.20065	0.509743		ENSMUSG00000078201	Tmem203	0	0.289984	1.22263	1
	ENSMUSG00000039959	Hip1	1	0.616285	1.53292	0.015674		ENSMUSG00000017639	Rab11fip4	1	0.766594	1.70125	1.2165e-06		ENSMUSG00000058099	Nfam1	0	0.26366	1.20052	0.550929		ENSMUSG00000030407	Qpctl	0	0.289615	1.22231	1
	ENSMUSG00000005672	Kit	1	0.616191	1.53282	0.00565288		ENSMUSG00000003363	Pld3	1	0.764943	1.6993	0.000136125		ENSMUSG00000031617	Tmem184c	0	0.263644	1.20051	0.729757		ENSMUSG00000072596	Ear2	0	0.289085	1.22187	0.772104
	ENSMUSG00000038268	Ovca2	1	0.615996	1.53262	0.0465799		ENSMUSG00000086765	Gm11827	1	0.76303	1.69705	0.0344561		ENSMUSG00000038587	Akap12	0	0.263468	1.20036	0.857409		ENSMUSG00000036478	Btg1	0	0.288906	1.22171	1
	ENSMUSG00000023904	Hcfc1r1	1	0.61555	1.53214	0.000847486		ENSMUSG00000048118	Arid4a	1	0.762917	1.69692	5.03895e-05		ENSMUSG00000094497	Gm8210	0	0.263438	1.20034	0.913424		ENSMUSG00000049577	Zfpm1	0	0.288902	1.22171	1
	ENSMUSG00000011179	Odc1	0	0.613197	1.52964	0.0557955		ENSMUSG00000001348	Acp5	1	0.762135	1.696	0.00557142		ENSMUSG00000061132	Blnk	0	0.263411	1.20031	0.788138		ENSMUSG00000042363	Lgalsl	0	0.288884	1.2217	1
	ENSMUSG00000036931	Nfkbid	1	0.611636	1.52799	0.0202624		ENSMUSG00000062515	Fabp4	0	0.758915	1.69222	0.177387		ENSMUSG00000039449	Prpf18	0	0.263197	1.20014	0.426162		ENSMUSG00000115026	Gm49041	0	0.287618	1.22062	1
	ENSMUSG00000030423	Pop4	1	0.61148	1.52783	0.00527971		ENSMUSG00000021114	Atp6v1d	1	0.758141	1.69131	2.19515e-08		ENSMUSG00000010453	Kansl3	0	0.26311	1.20006	0.610256		ENSMUSG00000032773	Chrm1	0	0.287001	1.2201	1
	ENSMUSG00000044786	Zfp36	1	0.611476	1.52782	0.00662715		ENSMUSG00000115026	Gm49041	1	0.757959	1.6911	0.00935546		ENSMUSG00000023019	Gpd1	0	0.263011	1.19998	0.827112		ENSMUSG00000006445	Epha2	0	0.286659	1.21981	1
	ENSMUSG00000028842	Ago3	0	0.611038	1.52736	0.292835		ENSMUSG00000016940	Kctd2	1	0.757434	1.69048	3.56347e-05		ENSMUSG00000049323	Smcr8	0	0.262999	1.19997	0.542555		ENSMUSG00000016344	Ppdpf	0	0.286422	1.21961	0.91376
	ENSMUSG00000031532	Saraf	1	0.610899	1.52721	6.72755e-06		ENSMUSG00000022957	Itsn1	1	0.757363	1.6904	0.00439093		ENSMUSG00000038425	Poli	0	0.262937	1.19992	0.799661		ENSMUSG00000021235	Coq6	0	0.286047	1.2193	1
	ENSMUSG00000031722	Hp	1	0.610663	1.52696	4.16308e-05		ENSMUSG00000072596	Ear2	1	0.757189	1.69019	3.11105e-08		ENSMUSG00000039901	Armh3	0	0.262007	1.19915	0.669912		ENSMUSG00000020732	Rab37	0	0.285609	1.21892	0.903848
	ENSMUSG00000053730	Tmem39b	1	0.610348	1.52663	0.0448027		ENSMUSG00000024778	Fas	1	0.757162	1.69016	0.00180218		ENSMUSG00000024299	Adamts10	0	0.26189	1.19905	0.699057		ENSMUSG00000102644	Thap6	0	0.284808	1.21825	1
	ENSMUSG00000026034	Clk1	1	0.609754	1.526	0.0209036		ENSMUSG00000054191	Klf1	0	0.756265	1.68911	0.106207		ENSMUSG00000069873	4930438A08Rik	0	0.261703	1.19889	0.466591		ENSMUSG00000029833	Trim24	0	0.284732	1.21818	1
	ENSMUSG00000014778	Fhod1	1	0.609554	1.52579	0.000239984		ENSMUSG00000027556	Car1	0	0.756015	1.68882	0.0624646		ENSMUSG00000029480	Dhx37	0	0.261609	1.19882	0.674563		ENSMUSG00000036896	C1qc	0	0.283561	1.2172	1
	ENSMUSG00000025898	Cwf19l2	1	0.609382	1.52561	0.00264056		ENSMUSG00000020863	Luc7l3	1	0.754922	1.68754	1.48641e-05		ENSMUSG00000031608	Galnt7	0	0.26157	1.19878	0.674172		ENSMUSG00000028967	Errfi1	0	0.28356	1.21719	1
	ENSMUSG00000022204	Ngdn	1	0.60912	1.52533	2.71098e-05		ENSMUSG00000032802	Srxn1	0	0.754457	1.687	0.0570991		ENSMUSG00000024019	Cmtr1	0	0.261375	1.19862	0.746439		ENSMUSG00000035278	Plekhj1	0	0.283314	1.21699	0.951014
	ENSMUSG00000002395	Use1	1	0.608234	1.52439	5.45398e-05		ENSMUSG00000060063	Alox5ap	1	0.754447	1.68699	1.04564e-08		ENSMUSG00000024220	Zfp523	0	0.261352	1.1986	0.61992		ENSMUSG00000072601	Ear1	0	0.282841	1.21659	1
	ENSMUSG00000091498	Mpc1-ps	1	0.60789	1.52403	0.00320346		ENSMUSG00000004359	Spic	0	0.754114	1.6866	0.0616837		ENSMUSG00000060675	Pla2g16	0	0.26091	1.19823	0.773717		ENSMUSG00000056144	Trim34a	0	0.282771	1.21653	1
	ENSMUSG00000028645	Slc2a1	1	0.607499	1.52362	0.00778076		ENSMUSG00000096844	Igkv6-14	0	0.753983	1.68644	0.602016		ENSMUSG00000021457	Syk	0	0.260906	1.19823	0.573337		ENSMUSG00000038065	Mturn	0	0.282692	1.21646	1
	ENSMUSG00000055835	Zfp1	0	0.606286	1.52233	0.160251		ENSMUSG00000022018	Rgcc	1	0.753105	1.68542	3.0155e-06		ENSMUSG00000018733	Pex12	0	0.26081	1.19815	0.766118		ENSMUSG00000042613	Pbxip1	0	0.282599	1.21638	1
	ENSMUSG00000107317	Gm19719	0	0.606053	1.52209	0.384403		ENSMUSG00000016409	Nkap	1	0.751394	1.68342	0.000524366		ENSMUSG00000048264	Dip2c	0	0.260732	1.19809	0.817357		ENSMUSG00000031563	Wwc2	0	0.282537	1.21633	1
	ENSMUSG00000037966	Ninj1	1	0.605979	1.52201	0.00630598		ENSMUSG00000039531	Zup1	1	0.751072	1.68304	0.000151311		ENSMUSG00000034330	Plcg2	0	0.260563	1.19795	0.490598		ENSMUSG00000032715	Trib3	0	0.282253	1.21609	1
	ENSMUSG00000021094	Dhrs7	1	0.605878	1.5219	0.00100546		ENSMUSG00000013974	Mcemp1	1	0.750293	1.68213	3.42957e-05		ENSMUSG00000011256	Adam19	0	0.260473	1.19787	0.57564		ENSMUSG00000033773	Rpap2	0	0.280895	1.21495	1
	ENSMUSG00000029314	Gpat3	1	0.605661	1.52168	0.00263095		ENSMUSG00000017002	Slpi	1	0.750152	1.68197	5.96393e-05		ENSMUSG00000039018	Mtg1	0	0.260421	1.19783	0.79537		ENSMUSG00000070354	Evi2	0	0.279745	1.21398	1
	ENSMUSG00000037110	Ralgapa2	1	0.605621	1.52163	0.00355717		ENSMUSG00000074677	Sirpb1c	1	0.749481	1.68119	8.8727e-05		ENSMUSG00000050310	Rictor	0	0.260075	1.19754	0.726455		ENSMUSG00000055148	Klf2	0	0.279313	1.21362	0.891009
	ENSMUSG00000084012	Gm11956	0	0.605547	1.52156	0.347314		ENSMUSG00000008384	Sertad1	1	0.748949	1.68057	0.00116532		ENSMUSG00000097471	5830432E09Rik	0	0.26003	1.1975	0.651705		ENSMUSG00000039046	Usp6nl	0	0.27929	1.2136	1
	ENSMUSG00000049988	Lrrc25	1	0.60552	1.52153	0.000366811		ENSMUSG00000031591	Asah1	1	0.748841	1.68044	2.06206e-11		ENSMUSG00000030881	Arfip2	0	0.259621	1.19716	0.703765		ENSMUSG00000011267	Zfp296	0	0.27925	1.21356	1
	ENSMUSG00000002064	Sdf2	1	0.605462	1.52147	1.26081e-05		ENSMUSG00000045251	Zfp688	1	0.7487	1.68028	0.000740025		ENSMUSG00000020397	Med7	0	0.25946	1.19703	0.622636		ENSMUSG00000033083	Tbc1d4	0	0.278816	1.2132	1
	ENSMUSG00000101517	4732465J04Rik	0	0.605427	1.52143	0.127002		ENSMUSG00000027706	Sec62	1	0.748215	1.67971	2.52148e-06		ENSMUSG00000024451	Arap3	0	0.259263	1.19687	0.61575		ENSMUSG00000105196	Mir142	0	0.278701	1.2131	1
	ENSMUSG00000053559	Smagp	0	0.605266	1.52126	0.106749		ENSMUSG00000042476	Abcb4	0	0.746945	1.67824	0.139054		ENSMUSG00000027652	Ralgapb	0	0.259152	1.19677	0.509743		ENSMUSG00000046718	Bst2	0	0.278627	1.21304	1
	ENSMUSG00000068580	Zfyve19	1	0.604429	1.52038	0.00674073		ENSMUSG00000076281	Gm24270	1	0.74681	1.67808	0.00674962		ENSMUSG00000047098	Rnf31	0	0.259058	1.1967	0.582693		ENSMUSG00000038205	Prkab2	0	0.278626	1.21304	1
	ENSMUSG00000004996	Mri1	0	0.603367	1.51926	0.118887		ENSMUSG00000092417	Gpank1	1	0.746708	1.67796	1.25846e-05		ENSMUSG00000063849	Ppcdc	0	0.258954	1.19661	0.749515		ENSMUSG00000011832	Evi5l	0	0.278582	1.213	1
	ENSMUSG00000032231	Anxa2	1	0.602233	1.51806	0.00039398		ENSMUSG00000024011	Pi16	1	0.746693	1.67794	3.23576e-05		ENSMUSG00000029073	Cptp	0	0.258895	1.19656	0.582693		ENSMUSG00000054716	Zfp771	0	0.27836	1.21282	1
	ENSMUSG00000025035	Arl3	1	0.601854	1.51767	0.0245543		ENSMUSG00000064368	mt-Nd6	1	0.745528	1.67659	0.0473334		ENSMUSG00000028436	Dcaf12	0	0.258832	1.19651	0.491803		ENSMUSG00000004707	Ly9	0	0.27831	1.21277	1
	ENSMUSG00000028106	Rprd2	1	0.601331	1.51712	1.57053e-05		ENSMUSG00000023571	C1qtnf12	1	0.7455	1.67655	1.49748e-06		ENSMUSG00000024773	Atg2a	0	0.258799	1.19648	0.590224		ENSMUSG00000059839	Zfp874b	0	0.278075	1.21258	1
	ENSMUSG00000079164	Tlr5	1	0.600618	1.51637	0.0141242		ENSMUSG00000045624	Esf1	1	0.745194	1.6762	0.00273035		ENSMUSG00000042331	Specc1	0	0.258668	1.19637	0.610256		ENSMUSG00000023827	Agpat4	0	0.277922	1.21245	1
	ENSMUSG00000018322	Tomm34	1	0.600534	1.51628	0.000130847		ENSMUSG00000102151	Gm37472	0	0.742654	1.67325	0.182725		ENSMUSG00000028580	Pum1	0	0.258516	1.19625	0.451199		ENSMUSG00000062488	Ifit3b	0	0.277883	1.21241	1
	ENSMUSG00000097572	Gm26797	1	0.599747	1.51545	0.00209414		ENSMUSG00000026981	Il1rn	1	0.740973	1.6713	3.68536e-05		ENSMUSG00000021948	Prkcd	0	0.258488	1.19622	0.617824		ENSMUSG00000032044	Rpusd4	0	0.277533	1.21212	1
	ENSMUSG00000024160	Spsb3	1	0.599446	1.51514	2.63832e-05		ENSMUSG00000016206	H2-M3	1	0.740893	1.67121	0.0164731		ENSMUSG00000035392	Dennd1a	0	0.258223	1.196	0.67009		ENSMUSG00000081453	Gm6767	0	0.277237	1.21187	1
	ENSMUSG00000111167	Gm39321	1	0.598726	1.51438	0.0058301		ENSMUSG00000025326	Ube3a	1	0.739823	1.66997	0.000154506		ENSMUSG00000073538	E330020D12Rik	0	0.257886	1.19573	0.901327		ENSMUSG00000075254	Heg1	0	0.276778	1.21149	1
	ENSMUSG00000014748	Tex261	1	0.597985	1.5136	2.96826e-05		ENSMUSG00000023904	Hcfc1r1	1	0.738784	1.66877	1.95342e-05		ENSMUSG00000021322	Aoah	0	0.257746	1.19561	0.56911		ENSMUSG00000016028	Celsr1	0	0.276752	1.21146	1
	ENSMUSG00000044250	Pced1b	1	0.597603	1.5132	0.0182073		ENSMUSG00000062210	Tnfaip8	1	0.738394	1.66832	1.66677e-10		ENSMUSG00000045639	Zfp629	0	0.257603	1.19549	0.856749		ENSMUSG00000049823	Zbtb12	0	0.276654	1.21138	1
	ENSMUSG00000026896	Ifih1	1	0.597587	1.51318	0.000147222		ENSMUSG00000022994	Adcy6	0	0.73758	1.66738	0.199835		ENSMUSG00000022946	Dop1b	0	0.257488	1.1954	0.611074		ENSMUSG00000101878	Gm8203	0	0.276439	1.2112	1
	ENSMUSG00000039005	Tlr4	1	0.597528	1.51312	0.00679136		ENSMUSG00000026712	Mrc1	1	0.736897	1.66659	0.0163983		ENSMUSG00000035944	Ttc38	0	0.257166	1.19513	0.648378		ENSMUSG00000022095	Fam160b2	0	0.276095	1.21091	0.743167
	ENSMUSG00000047867	Gimap6	0	0.59687	1.51243	0.190137		ENSMUSG00000023249	Parp3	1	0.736181	1.66576	0.00194287		ENSMUSG00000040723	Rcsd1	0	0.257156	1.19512	0.550929		ENSMUSG00000026874	Hc	0	0.276062	1.21088	1
	ENSMUSG00000034303	Ccdc15	0	0.596798	1.51236	0.31851		ENSMUSG00000042312	S100a13	1	0.736032	1.66559	2.74101e-05		ENSMUSG00000030110	Ret	0	0.25711	1.19508	0.845371		ENSMUSG00000027935	Rab13	0	0.275749	1.21062	1
	ENSMUSG00000044573	Acp1	1	0.596704	1.51226	0.000796934		ENSMUSG00000021786	Oxsm	1	0.735919	1.66546	0.000613252		ENSMUSG00000057738	Sptan1	0	0.25695	1.19495	0.542555		ENSMUSG00000037280	Galnt6	0	0.275695	1.21058	1
	ENSMUSG00000033880	Lgals3bp	1	0.595969	1.51149	0.0386177		ENSMUSG00000028832	Stmn1	1	0.734347	1.66364	1.3455e-05		ENSMUSG00000028030	Tbck	0	0.256931	1.19493	0.512802		ENSMUSG00000073436	Eme2	0	0.275545	1.21045	1
	ENSMUSG00000030188	Magohb	0	0.595957	1.51147	0.0832559		ENSMUSG00000012428	Steap4	0	0.734309	1.6636	0.0803235		ENSMUSG00000022488	Nckap1l	0	0.256768	1.1948	0.509743		ENSMUSG00000033355	Rtp4	0	0.275418	1.21034	1
	ENSMUSG00000030084	Plxna1	0	0.595733	1.51124	0.12636		ENSMUSG00000037606	Osbpl5	0	0.734111	1.66337	0.181397		ENSMUSG00000028465	Tln1	0	0.256654	1.1947	0.583373		ENSMUSG00000111942	Gm5182	0	0.275209	1.21017	1
	ENSMUSG00000053886	Sh2d4a	0	0.595551	1.51105	0.479444		ENSMUSG00000050270	Tmem220	0	0.73342	1.66258	0.0527638		ENSMUSG00000035399	Oser1	0	0.256535	1.19461	0.459159		ENSMUSG00000059423	Zfp933	0	0.275158	1.21013	1
	ENSMUSG00000023571	C1qtnf12	1	0.595493	1.51099	0.000293601		ENSMUSG00000055148	Klf2	1	0.73298	1.66207	4.99885e-07		ENSMUSG00000031400	G6pdx	0	0.25647	1.19455	0.510779		ENSMUSG00000097848	Gm807	0	0.274964	1.20996	1
	ENSMUSG00000025531	Chm	1	0.593612	1.50902	0.000222082		ENSMUSG00000004707	Ly9	1	0.731903	1.66083	0.00185038		ENSMUSG00000036941	Elac1	0	0.256269	1.19439	0.659962		ENSMUSG00000039307	Hexdc	0	0.274524	1.20959	1
	ENSMUSG00000038215	Cep44	1	0.593197	1.50859	0.0390423		ENSMUSG00000034634	Ly6d	0	0.731241	1.66007	0.0548102		ENSMUSG00000032216	Nedd4	0	0.256082	1.19423	0.550929		ENSMUSG00000020689	Itgb3	0	0.27444	1.20952	0.884002
	ENSMUSG00000033983	Coil	0	0.592876	1.50825	0.210651		ENSMUSG00000027639	Samhd1	1	0.731032	1.65983	5.59726e-07		ENSMUSG00000109675	Nxpe1-ps	0	0.256057	1.19421	0.839881		ENSMUSG00000079179	Rab10os	0	0.273773	1.20897	1
	ENSMUSG00000062937	Mtap	0	0.592479	1.50784	0.148418		ENSMUSG00000029048	Rer1	1	0.729968	1.6586	1.56398e-11		ENSMUSG00000031822	Gse1	0	0.256006	1.19417	0.477749		ENSMUSG00000029722	Agfg2	0	0.273571	1.2088	0.811065
	ENSMUSG00000046223	Plaur	1	0.592333	1.50768	0.00297879		ENSMUSG00000037922	Bank1	1	0.728502	1.65692	0.000500599		ENSMUSG00000063281	Zfp35	0	0.255875	1.19406	0.59377		ENSMUSG00000027981	Rnpc3	0	0.273305	1.20857	1
	ENSMUSG00000017756	Slc12a7	0	0.591839	1.50717	0.190144		ENSMUSG00000046229	Scand1	1	0.7281	1.65646	0.000105204		ENSMUSG00000046947	Adck2	0	0.255799	1.194	0.666808		ENSMUSG00000027624	Epb41l1	0	0.273286	1.20856	1
	ENSMUSG00000003123	Lipe	1	0.591707	1.50703	2.0632e-05		ENSMUSG00000058492	Scp2-ps2	0	0.728069	1.65642	0.0502004		ENSMUSG00000048410	Zfp407	0	0.255771	1.19397	0.658245		ENSMUSG00000097353	A430046D13Rik	0	0.27306	1.20837	1
	ENSMUSG00000033777	Tlr13	1	0.591428	1.50674	0.00908002		ENSMUSG00000030838	Ush1c	0	0.727151	1.65537	0.219388		ENSMUSG00000057691	Zfp746	0	0.255655	1.19388	0.474383		ENSMUSG00000051285	Pcmtd1	0	0.272773	1.20813	1
	ENSMUSG00000050022	Amz1	0	0.590733	1.50601	0.172261		ENSMUSG00000049988	Lrrc25	1	0.726436	1.65455	5.67104e-06		ENSMUSG00000027582	Zgpat	0	0.255537	1.19378	0.658313		ENSMUSG00000031712	Il15	0	0.27274	1.2081	1
	ENSMUSG00000072596	Ear2	1	0.589701	1.50494	4.73784e-05		ENSMUSG00000033256	Shf	0	0.72637	1.65447	0.159806		ENSMUSG00000032580	Rbm5	0	0.255456	1.19371	0.709793		ENSMUSG00000117763	AC025794.1	0	0.27273	1.20809	1
	ENSMUSG00000032601	Prkar2a	1	0.589301	1.50452	0.000221104		ENSMUSG00000075122	Cd80	1	0.726326	1.65442	0.0326552		ENSMUSG00000029438	Bcl7a	0	0.255431	1.19369	0.870248		ENSMUSG00000055413	H2-Q5	0	0.272452	1.20786	1
	ENSMUSG00000026832	Cytip	1	0.588566	1.50375	0.000255851		ENSMUSG00000076940	Iglv2	0	0.725892	1.65392	0.32325		ENSMUSG00000005540	Fcer2a	0	0.255363	1.19364	0.874207		ENSMUSG00000051790	Nlgn2	0	0.272451	1.20786	1
	ENSMUSG00000059657	Stfa2l1	0	0.588229	1.5034	0.0538554		ENSMUSG00000050705	2310061I04Rik	1	0.725646	1.65364	0.00231142		ENSMUSG00000022353	Mtss1	0	0.255203	1.1935	0.786327		ENSMUSG00000042198	Chchd7	0	0.272357	1.20778	1
	ENSMUSG00000034168	Irf2bpl	0	0.5874	1.50254	0.188345		ENSMUSG00000016833	Mrps18c	1	0.725327	1.65328	0.0199543		ENSMUSG00000055994	Nod2	0	0.255067	1.19339	0.726455		ENSMUSG00000085622	3110056K07Rik	0	0.272265	1.2077	1
	ENSMUSG00000074890	Lcmt2	1	0.585039	1.50008	0.00983879		ENSMUSG00000016503	Gtf3a	1	0.724218	1.652	0.00355758		ENSMUSG00000045980	Tmem104	0	0.255032	1.19336	0.509743		ENSMUSG00000118087	AC114539.1	0	0.27214	1.2076	1
	ENSMUSG00000074417	Gm14548	1	0.584719	1.49975	0.0162148		ENSMUSG00000022020	Naa16	1	0.723629	1.65133	0.00178909		ENSMUSG00000038241	Cep250	0	0.254162	1.19264	0.472229		ENSMUSG00000096403	Gm9825	0	0.271657	1.20719	1
	ENSMUSG00000101970	1810026B05Rik	0	0.584488	1.49951	0.0980164		ENSMUSG00000041949	Tango6	1	0.723582	1.65128	1.78275e-06		ENSMUSG00000043962	Thrap3	0	0.254138	1.19262	0.431686		ENSMUSG00000034714	Ttyh2	0	0.27153	1.20709	1
	ENSMUSG00000039623	Ap5z1	1	0.584388	1.4994	0.00758188		ENSMUSG00000040429	Mterf1a	1	0.723426	1.6511	0.0288181		ENSMUSG00000024143	Rhoq	0	0.254107	1.1926	0.783744		ENSMUSG00000038037	Socs1	0	0.270946	1.2066	1
	ENSMUSG00000021786	Oxsm	1	0.584269	1.49928	0.0118649		ENSMUSG00000050212	Eva1b	1	0.723314	1.65097	0.032933		ENSMUSG00000047466	8030462N17Rik	0	0.254099	1.19259	0.596081		ENSMUSG00000035828	Pim3	0	0.269857	1.20569	1
	ENSMUSG00000022995	Enah	0	0.582577	1.49752	0.364081		ENSMUSG00000046223	Plaur	1	0.722721	1.65029	0.000102828		ENSMUSG00000030223	Ptpro	0	0.254073	1.19257	0.822824		ENSMUSG00000045251	Zfp688	0	0.269857	1.20569	1
	ENSMUSG00000022884	Eif4a2	1	0.582229	1.49716	0.0214153		ENSMUSG00000037280	Galnt6	1	0.722588	1.65014	0.000149764		ENSMUSG00000005142	Man2b1	0	0.253773	1.19232	0.465837		ENSMUSG00000062148	Ear6	0	0.269816	1.20565	1
	ENSMUSG00000036896	C1qc	1	0.580849	1.49573	0.0336952		ENSMUSG00000020604	Arsg	1	0.722116	1.6496	7.88177e-06		ENSMUSG00000043939	A530064D06Rik	0	0.253693	1.19226	0.666808		ENSMUSG00000074361	C5ar2	0	0.269646	1.20551	1
	ENSMUSG00000070737	Tmem35b	0	0.580401	1.49526	0.0776199		ENSMUSG00000032413	Rasa2	1	0.722011	1.64948	1.29111e-07		ENSMUSG00000001741	Il16	0	0.253612	1.19219	0.57564		ENSMUSG00000034902	Pip5k1c	0	0.269403	1.20531	0.804858
	ENSMUSG00000110355	Gm7514	1	0.580141	1.495	0.0193729		ENSMUSG00000046807	Lrrc75b	1	0.721078	1.64841	0.0285741		ENSMUSG00000023764	Sfi1	0	0.253516	1.19211	0.79525		ENSMUSG00000026360	Rgs2	0	0.268798	1.2048	1
	ENSMUSG00000048779	P2ry6	0	0.58005	1.4949	0.0507848		ENSMUSG00000032249	Anp32a	1	0.720416	1.64766	1.5517e-05		ENSMUSG00000038256	Bcl9	0	0.253368	1.19199	0.67009		ENSMUSG00000020577	Tspan13	0	0.268672	1.2047	0.994148
	ENSMUSG00000039531	Zup1	1	0.57996	1.49481	0.00694577		ENSMUSG00000029551	Psmg3	1	0.720287	1.64751	0.0116426		ENSMUSG00000044544	4921513I03Rik	0	0.253288	1.19192	0.82829		ENSMUSG00000019866	Crybg1	0	0.268624	1.20466	0.802925
	ENSMUSG00000030695	Aldoa	1	0.579922	1.49477	3.21814e-05		ENSMUSG00000029465	Arpc3	1	0.72018	1.64739	2.51029e-07		ENSMUSG00000029528	Pxn	0	0.253268	1.1919	0.610256		ENSMUSG00000041762	Gpr155	0	0.26827	1.20436	1
	ENSMUSG00000022270	Retreg1	1	0.579486	1.49432	0.00125446		ENSMUSG00000056185	Snx32	0	0.71897	1.64601	0.0712942		ENSMUSG00000039308	Ndst2	0	0.253249	1.19189	0.642259		ENSMUSG00000035597	Prpf39	0	0.268205	1.20431	1
	ENSMUSG00000024456	Diaph1	1	0.578871	1.49368	0.000306824		ENSMUSG00000006519	Cyba	1	0.718661	1.64565	2.1848e-06		ENSMUSG00000020777	Acox1	0	0.253114	1.19178	0.59377		ENSMUSG00000050002	Idnk	0	0.268177	1.20429	1
	ENSMUSG00000024663	Rab3il1	0	0.578526	1.49332	0.180554		ENSMUSG00000027287	Snap23	1	0.718569	1.64555	1.20147e-05		ENSMUSG00000050213	Snip1	0	0.253078	1.19175	0.477065		ENSMUSG00000026069	Il1rl1	0	0.266802	1.20314	1
	ENSMUSG00000021061	Sptb	0	0.578452	1.49325	0.313557		ENSMUSG00000057329	Bcl2	0	0.717692	1.64455	0.0660379		ENSMUSG00000091649	Phf11b	0	0.253059	1.19173	0.867871		ENSMUSG00000059895	Ptp4a3	0	0.266688	1.20304	0.788849
	ENSMUSG00000117679	Apbb3	0	0.577932	1.49271	0.212166		ENSMUSG00000063049	Ing2	1	0.717656	1.64451	0.000260958		ENSMUSG00000023800	Tiam2	0	0.253053	1.19173	0.611074		ENSMUSG00000020956	Dtd2	0	0.266449	1.20284	1
	ENSMUSG00000029752	Asns	1	0.577791	1.49256	0.000163402		ENSMUSG00000038451	Spsb2	1	0.717	1.64376	5.75461e-06		ENSMUSG00000035545	Leng8	0	0.252868	1.19157	0.509743		ENSMUSG00000087644	Gm14703	0	0.266148	1.20259	1
	ENSMUSG00000047180	Neurl3	1	0.576389	1.49111	0.00409938		ENSMUSG00000042992	Borcs5	1	0.716265	1.64292	0.000868207		ENSMUSG00000017639	Rab11fip4	0	0.25277	1.19149	0.578023		ENSMUSG00000060429	Sntb1	0	0.265932	1.20241	1
	ENSMUSG00000049037	Clec4a1	1	0.575957	1.49067	0.0206427		ENSMUSG00000001053	N4bp3	1	0.71395	1.64029	0.00686755		ENSMUSG00000040321	Zfp770	0	0.252493	1.19126	0.898319		ENSMUSG00000028089	Chd1l	0	0.26581	1.20231	1
	ENSMUSG00000025877	Hk3	1	0.575612	1.49031	0.000791367		ENSMUSG00000090258	Churc1	0	0.713513	1.63979	0.185284		ENSMUSG00000053684	BC048403	0	0.252465	1.19124	0.735161		ENSMUSG00000039899	Fgl2	0	0.265334	1.20191	1
	ENSMUSG00000001794	Capns1	1	0.575491	1.49018	1.88192e-06		ENSMUSG00000035944	Ttc38	1	0.713377	1.63964	0.000297543		ENSMUSG00000037896	Rcor1	0	0.252407	1.19119	0.568367		ENSMUSG00000054435	Gimap4	0	0.265249	1.20184	1
	ENSMUSG00000051748	Wfdc21	1	0.575176	1.48986	0.00429309		ENSMUSG00000066551	Hmgb1	1	0.712904	1.6391	7.95495e-06		ENSMUSG00000027068	Dhrs9	0	0.251968	1.19083	0.760294		ENSMUSG00000090164	BC035044	0	0.265033	1.20166	1
	ENSMUSG00000018199	Trove2	1	0.575013	1.48969	0.0428195		ENSMUSG00000020300	Cpeb4	1	0.712785	1.63897	0.000346118		ENSMUSG00000028893	Sesn2	0	0.251952	1.19082	0.622696		ENSMUSG00000019699	Akt3	0	0.264222	1.20099	1
	ENSMUSG00000024661	Fth1	1	0.574826	1.4895	0.00111275		ENSMUSG00000068580	Zfyve19	1	0.712741	1.63892	0.000582081		ENSMUSG00000023022	Lima1	0	0.251942	1.19081	0.536771		ENSMUSG00000017754	Pltp	0	0.26415	1.20093	1
	ENSMUSG00000026273	Mterf4	1	0.57457	1.48923	0.0199078		ENSMUSG00000057762	Gm6169	1	0.712687	1.63885	0.0382788		ENSMUSG00000050332	Amer1	0	0.251918	1.19079	0.861138		ENSMUSG00000033450	Tagap	0	0.263942	1.20075	1
	ENSMUSG00000024597	Slc12a2	0	0.574367	1.48902	0.283581		ENSMUSG00000039195	1110008P14Rik	1	0.712654	1.63882	8.44737e-05		ENSMUSG00000044447	Dock5	0	0.25187	1.19075	0.573337		ENSMUSG00000029735	Tpk1	0	0.263653	1.20051	1
	ENSMUSG00000087593	Gm16174	0	0.573142	1.48776	0.357543		ENSMUSG00000053279	Aldh1a1	0	0.712165	1.63826	0.20356		ENSMUSG00000044167	Foxo1	0	0.251636	1.19056	0.773717		ENSMUSG00000028431	Elp1	0	0.263399	1.2003	0.907317
	ENSMUSG00000002985	Apoe	1	0.572311	1.4869	0.00821852		ENSMUSG00000033863	Klf9	1	0.712038	1.63812	0.0163983		ENSMUSG00000023982	Guca1a	0	0.251496	1.19044	0.82685		ENSMUSG00000014075	Tctex1d2	0	0.263222	1.20016	1
	ENSMUSG00000002332	Dhrs1	1	0.571566	1.48614	0.000463276		ENSMUSG00000020530	Ggnbp2	1	0.71187	1.63793	5.39669e-07		ENSMUSG00000020641	Rsad2	0	0.251051	1.19007	0.771665		ENSMUSG00000022686	B3gnt5	0	0.262587	1.19963	1
	ENSMUSG00000034714	Ttyh2	0	0.57154	1.48611	0.246041		ENSMUSG00000060639	Hist1h4i	1	0.711719	1.63775	0.00362333		ENSMUSG00000039787	Cercam	0	0.250874	1.18993	0.870926		ENSMUSG00000040929	Rfx3	0	0.262403	1.19948	1
	ENSMUSG00000029551	Psmg3	0	0.571525	1.48609	0.0721511		ENSMUSG00000091537	Tma7	1	0.710359	1.63621	1.07953e-06		ENSMUSG00000040563	Plppr2	0	0.250873	1.18993	0.869169		ENSMUSG00000002910	Arrdc2	0	0.26239	1.19946	1
	ENSMUSG00000034647	Ankrd12	1	0.571381	1.48595	0.0476607		ENSMUSG00000111128	Gm49338	1	0.709265	1.63497	0.0187426		ENSMUSG00000054008	Ndst1	0	0.250676	1.18976	0.57564		ENSMUSG00000033762	Recql4	0	0.262017	1.19915	1
	ENSMUSG00000021270	Hsp90aa1	1	0.571039	1.48559	0.0011297		ENSMUSG00000044792	Isca1	1	0.709101	1.63479	2.02479e-05		ENSMUSG00000110148	5830408C22Rik	0	0.250583	1.18969	0.814752		ENSMUSG00000053560	Ier2	0	0.261639	1.19884	1
	ENSMUSG00000021069	Pygl	1	0.570858	1.48541	0.001111		ENSMUSG00000046138	9930021J03Rik	1	0.707867	1.63339	0.00190114		ENSMUSG00000024947	Men1	0	0.250544	1.18966	0.503561		ENSMUSG00000024558	Mapk4	0	0.261416	1.19865	1
	ENSMUSG00000024014	Pim1	1	0.570466	1.485	0.000768345		ENSMUSG00000049526	Tmem202	1	0.707115	1.63254	0.0441885		ENSMUSG00000057132	Rpgrip1	0	0.250217	1.18939	0.909208		ENSMUSG00000006412	Pfdn2	0	0.261413	1.19865	1
	ENSMUSG00000030314	Atg7	1	0.570283	1.48481	0.00131084		ENSMUSG00000032750	Gab3	1	0.706602	1.63196	6.30773e-05		ENSMUSG00000070733	Fryl	0	0.249921	1.18914	0.550929		ENSMUSG00000043290	Zfp784	0	0.26131	1.19857	1
	ENSMUSG00000027309	4930402H24Rik	1	0.57003	1.48455	0.0114804		ENSMUSG00000026879	Gsn	1	0.706083	1.63137	2.15805e-06		ENSMUSG00000035064	Eef2k	0	0.249553	1.18884	0.451199		ENSMUSG00000024055	Cyp4f13	0	0.260612	1.19799	1
	ENSMUSG00000026946	Nmi	1	0.569351	1.48386	0.000916023		ENSMUSG00000002661	Alkbh7	1	0.705825	1.63108	0.0238386		ENSMUSG00000029089	5730480H06Rik	0	0.249533	1.18882	0.862387		ENSMUSG00000033577	Myo6	0	0.260015	1.19749	1
	ENSMUSG00000030403	Vasp	1	0.568505	1.48299	0.000415641		ENSMUSG00000037772	Mrpl23	0	0.705256	1.63043	0.0546923		ENSMUSG00000032615	Nt5m	0	0.249411	1.18872	0.762045		ENSMUSG00000085823	Gm13012	0	0.259599	1.19715	1
	ENSMUSG00000025279	Dnase1l3	0	0.568454	1.48293	0.282036		ENSMUSG00000079293	Clec7a	1	0.704193	1.62923	0.000129866		ENSMUSG00000040850	Psme4	0	0.249168	1.18852	0.550929		ENSMUSG00000024235	Map3k8	0	0.259443	1.19702	1
	ENSMUSG00000017747	Ghdc	1	0.568308	1.48278	0.0215214		ENSMUSG00000050732	Vamp8	1	0.702727	1.62758	0.000103913		ENSMUSG00000063160	Numbl	0	0.249067	1.18844	0.801285		ENSMUSG00000024457	Trim26	0	0.258995	1.19664	1
	ENSMUSG00000031144	Syp	0	0.567807	1.48227	0.0898426		ENSMUSG00000043770	Gm12481	1	0.702619	1.62746	0.000448534		ENSMUSG00000024135	Srbd1	0	0.248861	1.18827	0.610889		ENSMUSG00000031453	Rasa3	0	0.258949	1.19661	0.772104
	ENSMUSG00000037860	Aim2	1	0.567627	1.48208	0.0335439		ENSMUSG00000098318	Lockd	1	0.702309	1.62711	0.0453405		ENSMUSG00000021156	Zmynd11	0	0.248638	1.18808	0.576166		ENSMUSG00000017132	Cyth1	0	0.258786	1.19647	0.746762
	ENSMUSG00000059108	Ifitm6	1	0.567323	1.48177	0.000861093		ENSMUSG00000036585	Fgf1	0	0.701356	1.62603	0.220045		ENSMUSG00000078606	Gm4070	0	0.248597	1.18805	0.873897		ENSMUSG00000019539	Rcn3	0	0.258336	1.1961	1
	ENSMUSG00000033538	Casp4	1	0.567261	1.48171	0.00155937		ENSMUSG00000066682	Pilrb2	1	0.700451	1.62501	9.60018e-06		ENSMUSG00000026837	Col5a1	0	0.24854	1.188	0.726455		ENSMUSG00000033191	Tie1	0	0.257928	1.19576	1
	ENSMUSG00000037348	Paqr7	1	0.565808	1.48022	6.79434e-07		ENSMUSG00000047407	Tgif1	0	0.699862	1.62435	0.133316		ENSMUSG00000031399	Fam3a	0	0.248284	1.18779	0.620216		ENSMUSG00000022390	Zc3h7b	0	0.25734	1.19527	1
	ENSMUSG00000039219	Arid4b	1	0.565677	1.48008	0.046796		ENSMUSG00000040713	Creg1	1	0.699289	1.6237	2.27464e-05		ENSMUSG00000022416	Cacna1i	0	0.248258	1.18777	0.919692		ENSMUSG00000020589	Fam49a	0	0.257089	1.19506	1
[truncated: 9,599 more rows]

## Sheet: S4 (MS B6>Balbc)
GroupID	Category	Term	Description	LogP	Log(q-value)	InTerm_InList	Genes	Symbols
[truncated: 271 more rows]

## Sheet: S5 (MS Balbc>B6)
GroupID	Category	Term	Description	LogP	Log(q-value)	InTerm_InList	Genes	Symbols
[truncated: 273 more rows]

[truncated: 4 more sheets: S6 (MS TC1>CT26), S7 (MS CT26>TC1), S8 (IPA B6-Balbc), S9 (IPA TC1-CT26)]
